# Supplementary material for: Midkine-a Regulates the Formation of a Fibrotic Scar During Zebrafish Heart Regeneration
Source: Front Cell Dev Biol. 2021 May 7;9:669439. doi: 10.3389/fcell.2021.669439 (PMC8138450; doi:10.3389/fcell.2021.669439)
Supplement: Supplementary file 8 [file Table_1.xlsx]

## Sheet: All genes
ID		AvrExp		Norm_KO_2	Raw_KO_2	Norm_KO_3	Raw_KO_3	Norm_KO_4_	Raw_KO_4_		Norm_WT_1	Raw_WT_1	Norm_WT_2	Raw_WT_2	Norm_WT_4	Raw_WT_4		ave_KO	ave_WT	foldChange	logFC	P.Value	adj.P.Val	chromosome_name	start_position	end_position	strand	zfin_id_symbol	description	gene_biotype	ensembl_transcript_id
ENSDARG00000075963		85.8416		166.829	4280	140.869	3024	193.978	3877		6.77981	146	3.77345	72	2.82065	53		167.225	4.45797	39.1906	5.29244	2.00103e-07	0.00323486	19	7072854	7101100	1	mhc1uba	major histocompatibility complex class I UBA [Source:ZFIN;Acc:ZDB-GENE-990415-145]	protein_coding	ENSDART00000009689,ENSDART00000151233,ENSDART00000151649
ENSDARG00000091951		0.587799		1.22768	31	1.04796	22	1.17563	23		0.0231393	0	0.0260238	0	0.0263612	0		1.15042	0.0251748	45.7953	5.51713	1.67307e-06	0.0135234	19	7878122	7886461	1	nuggc.2	nuclear GTPase, germinal center associated, tandem duplicate 2 [Source:ZFIN;Acc:ZDB-GENE-060503-185]	protein_coding	ENSDART00000131656,ENSDART00000131917,ENSDART00000136583
ENSDARG00000013687		39.1555		49.8674	1279	55.0294	1181	53.5035	1069		25.8466	558	26.9346	517	23.7515	450		52.8001	25.5109	2.07014	1.04973	1.41601e-05	0.0538778	22	18469004	18485470	1	cilp2	cartilage intermediate layer protein 2 [Source:ZFIN;Acc:ZDB-GENE-050208-436]	protein_coding	ENSDART00000061430,ENSDART00000132684
ENSDARG00000095082		1.68817		0.0194871	0	0.0698638	1	0.0250133	0		3.03125	65	2.21202	42	4.77138	90		0.0381214	3.33822	-97.6666	-6.60979	1.59114e-05	0.0538778	7	33172066	33176106	1	si:ch211-194p6.12	si:ch211-194p6.12 [Source:ZFIN;Acc:ZDB-GENE-160728-9]	protein_coding	ENSDART00000174013
ENSDARG00000046019		25.6269		32.9136	844	34.6757	744	36.5945	731		14.6934	317	17.6702	339	17.2139	326		34.728	16.5258	2.11011	1.07732	2.73177e-05	0.0538778	23	2502181	2513300	-1	snai1b	snail family zinc finger 1b [Source:ZFIN;Acc:ZDB-GENE-980526-514]	protein_coding	ENSDART00000067652
ENSDARG00000013050		18.0727		27.886	715	22.566	484	24.7382	494		10.6209	229	11.6326	223	10.9926	208		25.0634	11.0821	2.26084	1.17686	2.95972e-05	0.0538778	7	38158604	38183331	-1	abcc12	ATP-binding cassette, sub-family C (CFTR/MRP), member 12 [Source:ZFIN;Acc:ZDB-GENE-050517-25]	protein_coding	ENSDART00000149382
ENSDARG00000056653		61.4034		80.4621	2064	81.2982	1745	76.2156	1523		43.9878	950	41.2998	793	45.1568	856		79.3253	43.4814	1.82482	0.867754	3.09529e-05	0.0538778	10	26597990	26621189	1	fhl1b	four and a half LIM domains 1b [Source:ZFIN;Acc:ZDB-GENE-031219-1]	protein_coding	ENSDART00000079187,ENSDART00000134322,ENSDART00000138474
ENSDARG00000077261		15.5378		21.7281	557	19.9112	427	20.586	411		9.78792	211	10.6958	205	10.5181	199		20.7417	10.3339	2.01225	1.00881	3.71367e-05	0.0538778	11	24889170	24894907	1	lmod1b	leiomodin 1b (smooth muscle) [Source:ZFIN;Acc:ZDB-GENE-141215-22]	protein_coding	ENSDART00000113310
ENSDARG00000100075		24.2932		30.7701	789	33.4182	717	33.8931	677		14.5546	314	15.2239	292	17.8993	339		32.6938	15.8926	2.06644	1.04714	3.86377e-05	0.0538778	23	45906137	45936357	1	abcg2a	ATP-binding cassette, sub-family G (WHITE), member 2a [Source:ZFIN;Acc:ZDB-GENE-050517-35]	protein_coding	ENSDART00000159939,ENSDART00000165025
ENSDARG00000110658		0.770086		1.38358	35	1.79317	38	1.27568	25		0.115696	2	0.0260238	0	0.0263612	0		1.48414	0.0560271	34.1492	5.09378	3.92345e-05	0.0538778	4	42065748	42074960	-1	zgc:174696	zgc:174696 [Source:ZFIN;Acc:ZDB-GENE-030131-2836]	protein_coding	ENSDART00000164406
ENSDARG00000070579		1.86465		6.29432	161	2.49181	53	2.32624	46		0.0231393	0	0.0260238	0	0.0263612	0		3.70412	0.0251748	136.871	7.09667	3.984e-05	0.0538778	1	2446996	2453185	-1	ggact.3	gamma-glutamylamine cyclotransferase, tandem duplicate 3 [Source:NCBI gene;Acc:100038780]	protein_coding	ENSDART00000103785,ENSDART00000152555,ENSDART00000190207
ENSDARG00000017058		17.4401		21.4942	551	23.777	510	23.9878	479		11.5465	249	11.8408	227	11.9944	227		23.0863	11.7939	1.95367	0.966184	4.31597e-05	0.0538778	18	45114392	45264117	1	large2	LARGE xylosyl- and glucuronyltransferase 2 [Source:NCBI gene;Acc:446214]	protein_coding	ENSDART00000015786,ENSDART00000127953,ENSDART00000172328
ENSDARG00000070743		29.0201		36.0316	924	36.9114	792	42.0474	840		19.8304	428	18.6591	358	20.6408	391		38.3301	19.7101	1.9409	0.956728	4.43561e-05	0.0538778	6	36821621	36837536	1	tmem45a	transmembrane protein 45a [Source:ZFIN;Acc:ZDB-GENE-050522-34]	protein_coding	ENSDART00000104157
ENSDARG00000010785		383.947		725.328	18610	469.229	10074	513.849	10271		179.445	3877	227.006	4361	188.825	3581		569.468	198.425	2.83196	1.5018	5.17983e-05	0.0538778	20	29036328	29052391	-1	thbs1b	thrombospondin 1b [Source:ZFIN;Acc:ZDB-GENE-020708-1]	protein_coding	ENSDART00000017090,ENSDART00000140350,ENSDART00000153143,ENSDART00000193482
ENSDARG00000114226		20.3333		12.0235	308	12.1796	261	14.6828	293		28.7621	621	24.8007	476	29.5509	560		12.962	27.7046	-2.14954	-1.10403	5.27172e-05	0.0538778	17	741424	751083	-1			protein_coding	ENSDART00000188606
ENSDARG00000040178		32.9064		43.3977	1113	42.6868	916	49.2012	983		17.609	380	20.8451	400	23.6987	449		45.0952	20.7176	2.19345	1.1332	5.33246e-05	0.0538778	21	29100972	29110607	-1	havcr1	hepatitis A virus cellular receptor 1 [Source:ZFIN;Acc:ZDB-GENE-040718-131]	protein_coding	ENSDART00000058774,ENSDART00000133318,ENSDART00000134238,ENSDART00000134782,ENSDART00000142625,ENSDART00000181595
ENSDARG00000017128		85.3669		106.185	2724	107.8	2314	116.887	2336		67.451	1457	57.1223	1097	56.7557	1076		110.291	60.443	1.82902	0.871073	8.22279e-05	0.0747465	13	29238850	29288902	1	myofl	myoferlin like [Source:ZFIN;Acc:ZDB-GENE-111116-2]	protein_coding	ENSDART00000026000
ENSDARG00000104292		11.5445		15.6091	400	15.3933	330	17.5343	350		8.26072	178	6.06355	116	6.40578	121		16.1789	6.91002	2.34114	1.22721	8.32264e-05	0.0747465	19	13803155	13808632	-1	ccn2b	cellular communication network factor 2b [Source:ZFIN;Acc:ZDB-GENE-070705-82]	protein_coding	ENSDART00000166895,ENSDART00000187670
ENSDARG00000036036		430.873		81.7482	2097	132.345	2841	140.1	2800		427.221	9231	733.793	14098	1070.03	20295		118.064	743.681	-6.04879	-2.59665	9.23784e-05	0.0785995	7	39166460	39178198	1	mdka	midkine a [Source:ZFIN;Acc:ZDB-GENE-990621-1]	protein_coding	ENSDART00000052318,ENSDART00000146635,ENSDART00000173600,ENSDART00000173767,ENSDART00000173877
ENSDARG00000034643		79.9091		110.745	2841	105.564	2266	112.185	2242		61.4348	1327	48.5344	932	40.9917	777		109.498	50.3203	2.20491	1.14072	0.00010854	0.0813531	16	33655890	33736831	1	fhl3a	four and a half LIM domains 3a [Source:ZFIN;Acc:ZDB-GENE-030131-4741]	protein_coding	ENSDART00000143757,ENSDART00000144874
ENSDARG00000038248		4.56777		15.882	407	6.1713	132	5.27781	105		0.0231393	0	0.0260238	0	0.0263612	0		9.11036	0.0251748	331.479	8.37277	0.000108662	0.0813531	1	2450140	2453174	-1	ggact.2	gamma-glutamylamine cyclotransferase, tandem duplicate 2 [Source:NCBI gene;Acc:447805]	protein_coding	ENSDART00000055779
ENSDARG00000060093		19.4055		24.4952	628	24.4756	525	24.2879	485		14.3695	310	14.8596	285	13.9451	264		24.4196	14.3914	1.69744	0.763362	0.000110712	0.0813531	5	44654535	44795906	1	dapk1	death-associated protein kinase 1 [Source:ZFIN;Acc:ZDB-GENE-060526-177]	protein_coding	ENSDART00000124059,ENSDART00000136642,ENSDART00000181872,ENSDART00000182190
ENSDARG00000043081		91.9712		107.783	2765	115.252	2474	124.141	2481		64.3041	1389	69.1453	1328	71.2017	1350		115.725	68.217	1.69528	0.761522	0.000127177	0.0885159	6	49771372	49781362	1	ctsz	cathepsin Z [Source:ZFIN;Acc:ZDB-GENE-041010-139]	protein_coding	ENSDART00000063251,ENSDART00000134207,ENSDART00000149055
ENSDARG00000071014		78.5283		97.6886	2506	94.1066	2020	99.2779	1984		56.9458	1230	61.6504	1184	61.5007	1166		97.0244	60.0323	1.61693	0.693253	0.00013141	0.0885159	19	7575141	7591062	1	s100u	S100 calcium binding protein U [Source:ZFIN;Acc:ZDB-GENE-030131-3121]	protein_coding	ENSDART00000051528,ENSDART00000134271
ENSDARG00000010962		35.0761		40.5526	1040	49.3006	1058	45.1991	903		25.1987	544	23.3434	448	26.8621	509		45.0174	25.1347	1.78803	0.83837	0.00015076	0.0974878	9	42728269	42730672	-1	fkbp7	FKBP prolyl isomerase 7 [Source:ZFIN;Acc:ZDB-GENE-030616-182]	protein_coding	ENSDART00000132608,ENSDART00000136728
ENSDARG00000042122		40.0424		29.0552	745	30.9962	665	28.8404	576		51.2535	1107	45.5677	875	54.5414	1034		29.6306	50.4542	-1.69907	-0.764742	0.000166142	0.100445	8	17993788	18010735	-1	acot11b	acyl-CoA thioesterase 11b [Source:ZFIN;Acc:ZDB-GENE-051127-37]	protein_coding	ENSDART00000121660,ENSDART00000122730,ENSDART00000125014,ENSDART00000133666,ENSDART00000140324,ENSDART00000142761
ENSDARG00000022372		10.1956		20.5588	527	13.9029	298	12.8819	257		4.23449	91	4.08574	78	5.5095	104		15.7812	4.60991	3.4238	1.7756	0.000173416	0.100445	22	36839080	36876133	-1	kng1	kininogen 1 [Source:ZFIN;Acc:ZDB-GENE-041010-56]	protein_coding	ENSDART00000029588,ENSDART00000137548,ENSDART00000147006
ENSDARG00000077073		10.6201		12.803	328	14.6947	315	15.4332	308		6.17819	133	7.57293	145	7.03845	133		14.3103	6.92985	2.0644	1.04573	0.000177339	0.100445	6	12036951	12172424	-1	tanc1a	tetratricopeptide repeat, ankyrin repeat and coiled-coil containing 1a [Source:ZFIN;Acc:ZDB-GENE-130530-819]	protein_coding	ENSDART00000109344,ENSDART00000155090
ENSDARG00000098817		33.2875		21.3383	547	26.9441	578	24.6381	492		41.2573	891	42.3407	813	43.206	819		24.3069	42.268	-1.74998	-0.807335	0.000180186	0.100445	24	37274759	37287792	-1		potassium channel tetramerization domain containing 5b [Source:NCBI gene;Acc:100334206]	protein_coding	ENSDART00000166086
ENSDARG00000100596		59.23		45.2295	1160	38.7744	832	39.346	786		89.8961	1942	73.6214	1414	68.5128	1299		41.1166	77.3434	-1.8723	-0.90481	0.000207727	0.108815	14	7120620	7128980	-1	si:ch73-43g23.1	si:ch73-43g23.1 [Source:ZFIN;Acc:ZDB-GENE-041111-305]	protein_coding	ENSDART00000171311
ENSDARG00000040621		12.1507		19.8573	509	15.4865	332	14.7329	294		7.05748	152	7.67702	147	8.0929	153		16.6922	7.60913	2.19604	1.13491	0.000208664	0.108815	10	252425	257043	1	lrrc32	leucine rich repeat containing 32 [Source:ZFIN;Acc:ZDB-GENE-090630-1]	protein_coding	ENSDART00000059478
ENSDARG00000075831		30.6704		35.0962	900	43.5252	934	38.4955	769		21.4501	463	23.7077	455	21.748	412		39.039	22.3019	1.74564	0.803753	0.000218673	0.110471	7	24208611	24236364	-1	slc7a8a	solute carrier family 7 member 8a [Source:ZFIN;Acc:ZDB-GENE-121120-2]	protein_coding	ENSDART00000010124
ENSDARG00000070314		116.168		147.108	3774	143.011	3070	156.508	3128		96.3751	2082	72.7365	1397	81.2717	1541		148.876	83.4611	1.79473	0.843766	0.000235364	0.1153	4	7415337	7503443	1	cald1a	caldesmon 1a [Source:ZFIN;Acc:ZDB-GENE-030131-1629]	processed_transcript	ENSDART00000103048,ENSDART00000168327
ENSDARG00000039150		349.285		404.61	10381	427.823	9185	436.758	8730		269.503	5823	276.399	5310	280.615	5322		423.063	275.506	1.5351	0.618329	0.000266049	0.122102	13	36037970	36050327	-1	lgmn	legumain [Source:ZFIN;Acc:ZDB-GENE-021030-1]	protein_coding	ENSDART00000134955,ENSDART00000139087,ENSDART00000189978
ENSDARG00000075707		49.2649		55.2458	1417	74.6378	1602	62.3582	1246		35.7502	772	36.043	692	31.5544	598		64.0806	34.4492	1.84882	0.886601	0.000270055	0.122102	17	14796926	14876758	-1	nid2a	nidogen 2a (osteonidogen) [Source:ZFIN;Acc:ZDB-GENE-030827-2]	protein_coding	ENSDART00000154473,ENSDART00000155857,ENSDART00000155907,ENSDART00000156287,ENSDART00000156326,ENSDART00000156476,ENSDART00000157051
ENSDARG00000030092		14.6393		18.3373	470	18.3742	394	17.7345	354		11.1763	241	10.8519	208	11.3617	215		18.1487	11.13	1.63136	0.706075	0.000281937	0.122102	20	48116476	48139941	1	tram2	translocation associated membrane protein 2 [Source:ZFIN;Acc:ZDB-GENE-040426-2024]	protein_coding	ENSDART00000043938,ENSDART00000148494
ENSDARG00000079703		1.62563		1.34461	34	6.35761	136	1.97605	39		0.0231393	0	0.0260238	0	0.0263612	0		3.22609	0.0251748	99.3922	6.63506	0.00028234	0.122102	9	30387916	30392745	1	si:dkey-18p12.4	si:dkey-18p12.4 [Source:ZFIN;Acc:ZDB-GENE-070912-408]	protein_coding	ENSDART00000112827,ENSDART00000141565
ENSDARG00000032856		2.11904		3.29331	84	3.4699	74	3.47685	69		0.485925	10	1.17107	22	0.817198	15		3.41336	0.824731	4.45245	2.1546	0.000287015	0.122102	11	25583950	25618583	1	ccdc120	coiled-coil domain containing 120 [Source:ZFIN;Acc:ZDB-GENE-061027-93]	protein_coding	ENSDART00000111961,ENSDART00000140856
ENSDARG00000110178		17.668		20.9876	538	22.24	477	23.5876	471		11.963	258	14.3391	275	12.8906	244		22.2717	13.0643	1.70846	0.772693	0.000307669	0.125388	6	168962	172992	1			protein_coding	ENSDART00000182631
ENSDARG00000090890		33.4875		37.1618	953	44.4567	954	51.0022	1019		25.3375	547	20.4807	393	22.4861	426		44.2069	22.7681	1.92896	0.947821	0.000317053	0.125388	5	20570573	20590795	1	cmklr1	chemokine-like receptor 1 [Source:ZFIN;Acc:ZDB-GENE-060526-126]	protein_coding	ENSDART00000130911,ENSDART00000137019
ENSDARG00000093386		0.935613		0.175384	4	0.349319	7	0.325173	6		1.4115	30	1.69155	32	1.66076	31		0.283292	1.58793	-5.92913	-2.56782	0.000318007	0.125388	8	20950344	20953980	1	si:dkeyp-82a1.1	si:dkeyp-82a1.1 [Source:ZFIN;Acc:ZDB-GENE-081105-23]	protein_coding	ENSDART00000131329,ENSDART00000136484,ENSDART00000138728,ENSDART00000142229,ENSDART00000144451,ENSDART00000144650,ENSDART00000144929,ENSDART00000146919
ENSDARG00000021442		33.1008		41.1762	1056	47.2978	1015	37.595	751		25.8466	558	22.0942	424	24.595	466		42.023	24.1786	1.73276	0.793071	0.000337415	0.125978	7	43760149	43857938	-1	cdh11	cadherin 11, type 2, OB-cadherin (osteoblast) [Source:ZFIN;Acc:ZDB-GENE-980526-170]	protein_coding	ENSDART00000002279,ENSDART00000174592,ENSDART00000179758,ENSDART00000183602
ENSDARG00000043806		265.143		405.662	10408	359.17	7711	284.126	5679		182.361	3940	164.757	3165	194.783	3694		349.653	180.633	1.91895	0.940318	0.000340746	0.125978	10	25762196	25817854	-1	postna	periostin, osteoblast specific factor a [Source:ZFIN;Acc:ZDB-GENE-091113-23]	protein_coding	ENSDART00000017240,ENSDART00000134176,ENSDART00000147677
ENSDARG00000016348		3.68796		6.09945	156	5.14663	110	5.72805	114		1.1801	25	2.57636	49	1.39714	26		5.65805	1.71787	3.52895	1.81924	0.000357379	0.125978	6	39531135	39605734	-1	dip2bb	disco-interacting protein 2 homolog Bb [Source:ZFIN;Acc:ZDB-GENE-100729-4]	protein_coding	ENSDART00000044276,ENSDART00000179059
ENSDARG00000092228		1.52638		2.5528	65	2.25893	48	2.77648	55		0.624761	13	0.286262	5	0.659031	12		2.5294	0.523351	5.10675	2.3524	0.000366859	0.125978	5	22406672	22424496	1	si:dkey-27p18.3	si:dkey-27p18.3 [Source:ZFIN;Acc:ZDB-GENE-060526-287]	protein_coding	ENSDART00000141385
ENSDARG00000069773		22.9704		16.6614	427	15.3468	329	15.3332	306		27.9754	604	26.206	503	36.2994	688		15.7805	30.1603	-1.88863	-0.917337	0.000368039	0.125978	7	17559929	17600540	1	nitr1b	novel immune-type receptor 1b [Source:ZFIN;Acc:ZDB-GENE-020225-16]	protein_coding	ENSDART00000063060,ENSDART00000101955,ENSDART00000129017,ENSDART00000159699,ENSDART00000165724
ENSDARG00000076010		23.458		38.1751	979	33.6511	722	26.0389	520		17.4239	376	12.6736	243	12.7852	242		32.6217	14.2942	2.27352	1.18493	0.000368079	0.125978	16	19732543	19734149	1	twist1b	twist family bHLH transcription factor 1b [Source:ZFIN;Acc:ZDB-GENE-050417-357]	protein_coding	ENSDART00000052927,ENSDART00000149901
ENSDARG00000062688		9.1745		16.1548	414	13.4371	288	11.331	226		3.7717	81	6.68812	128	3.66421	69		13.641	4.70801	3.02368	1.59631	0.000374053	0.125978	19	20247435	20270207	-1	gpnmb	glycoprotein (transmembrane) nmb [Source:ZFIN;Acc:ZDB-GENE-060503-106]	protein_coding	ENSDART00000090883,ENSDART00000144891,ENSDART00000151818
ENSDARG00000037362		3.97873		5.04715	129	6.03158	129	5.77808	115		2.24451	48	2.05588	39	2.71521	51		5.61893	2.33853	2.40318	1.26494	0.00039657	0.129238	7	28569266	28611145	-1	scube2	signal peptide, CUB domain, EGF-like 2 [Source:NCBI gene;Acc:503728]	protein_coding	ENSDART00000054366
ENSDARG00000063634		9.03876		11.283	289	11.1083	238	14.7829	295		6.27074	135	5.64717	108	5.14044	97		12.3914	5.68612	2.14813	1.10308	0.000399721	0.129238	21	19345558	19364352	1	hpse	heparanase [Source:ZFIN;Acc:ZDB-GENE-041111-200]	protein_coding	ENSDART00000093155,ENSDART00000184733
ENSDARG00000079327		84.1743		126.101	3235	139.145	2987	93.725	1873		63.9801	1382	40.2068	772	41.888	794		119.657	48.6916	2.47882	1.30965	0.000435246	0.135879	8	32613916	32785627	1	hmcn2	hemicentin 2 [Source:ZFIN;Acc:ZDB-GENE-030131-9765]	protein_coding	ENSDART00000112067,ENSDART00000137897,ENSDART00000138117,ENSDART00000142824,ENSDART00000145362,ENSDART00000147594
ENSDARG00000074781		1.4658		0.526151	13	0.535623	11	0.625333	12		2.66102	57	2.68045	51	1.7662	33		0.562369	2.36922	-4.18968	-2.06684	0.000437072	0.135879	6	51020918	51386696	-1	ptprt	protein tyrosine phosphatase receptor type T [Source:ZFIN;Acc:ZDB-GENE-101028-4]	protein_coding	ENSDART00000154732,ENSDART00000177990,ENSDART00000180197,ENSDART00000184928
ENSDARG00000055381		80.8963		106.692	2737	99.5559	2137	95.626	1911		70.0889	1514	56.1854	1079	57.2302	1085		100.625	61.1682	1.6516	0.723865	0.000459352	0.138921	12	23424108	23430356	1	bambia	BMP and activin membrane-bound inhibitor (Xenopus laevis) homolog a [Source:ZFIN;Acc:ZDB-GENE-010416-1]	protein_coding	ENSDART00000077732
ENSDARG00000035198		10.0576		12.842	329	14.0892	302	12.1815	243		8.02933	173	6.37583	122	6.82756	129		13.0376	7.07757	1.84089	0.880402	0.000464044	0.138921	5	51026563	51030105	1	gcnt4a	glucosaminyl (N-acetyl) transferase 4a [Source:NCBI gene;Acc:324510]	protein_coding	ENSDART00000050988
ENSDARG00000014673		31.7936		23.404	600	16.3714	351	24.0878	481		47.5512	1027	40.6752	781	38.6719	733		21.2877	42.2994	-2.00773	-1.00557	0.000483983	0.141473	18	41648812	41650648	-1	fzd9b	frizzled class receptor 9b [Source:ZFIN;Acc:ZDB-GENE-000906-4]	protein_coding	ENSDART00000024087
ENSDARG00000038938		57.6133		87.5164	2245	70.5857	1515	72.5637	1450		48.338	1044	33.909	651	32.767	621		76.8886	38.338	2.02582	1.01851	0.000494476	0.141473	9	44304980	44420380	1	itprid2	ITPR interacting domain containing 2 [Source:ZFIN;Acc:ZDB-GENE-090824-1]	protein_coding	ENSDART00000147990,ENSDART00000148826,ENSDART00000185947
ENSDARG00000076120		97.8224		115.11	2953	121.167	2601	114.436	2287		78.6504	1699	82.6256	1587	74.945	1421		116.904	78.7403	1.48538	0.570829	0.000500052	0.141473	11	21910343	22094392	1	foxp4	forkhead box P4 [Source:ZFIN;Acc:ZDB-GENE-101207-1]	protein_coding	ENSDART00000114288,ENSDART00000161485
ENSDARG00000023578		108.177		154.474	3963	132.532	2845	123.991	2478		68.608	1482	84.6555	1626	84.8041	1608		136.999	79.3558	1.72706	0.788318	0.00051708	0.141473	6	28294113	28690670	1	lpp	LIM domain containing preferred translocation partner in lipoma [Source:ZFIN;Acc:ZDB-GENE-040426-918]	protein_coding	ENSDART00000136898,ENSDART00000188056
ENSDARG00000097256		131.472		77.8118	1996	62.3884	1339	84.7202	1693		252.334	5452	171.679	3298	139.899	2653		74.9735	187.971	-2.45135	-1.29358	0.000537179	0.141473	17	15297398	15305586	1	si:ch211-270g19.5	si:ch211-270g19.5 [Source:ZFIN;Acc:ZDB-GENE-131121-121]	protein_coding	ENSDART00000156574
ENSDARG00000003061		66.9776		80.618	2068	75.1967	1614	98.8777	1976		53.3823	1153	44.8911	862	48.9001	927		84.8975	49.0578	1.72293	0.784863	0.000539307	0.141473	18	50433722	50524042	-1	cd276	CD276 molecule [Source:ZFIN;Acc:ZDB-GENE-070112-452]	protein_coding	ENSDART00000033591,ENSDART00000149912,ENSDART00000150013
ENSDARG00000100904		21.2599		27.1065	695	27.7825	596	28.0399	560		17.0999	369	11.4765	220	16.054	304		27.643	14.8768	1.87912	0.910058	0.000553869	0.141473	KN149855.1	17504	19836	1			protein_coding	ENSDART00000162455
ENSDARG00000031678		922.311		1040.28	26691	1223.8	26275	1136.43	22716		694.711	15011	658.428	12650	780.213	14798		1133.5	711.117	1.59457	0.673167	0.000565469	0.141473	9	42653188	42696408	-1	col5a2a	collagen, type V, alpha 2a [Source:ZFIN;Acc:ZDB-GENE-030616-13]	protein_coding	ENSDART00000144744
ENSDARG00000086703		35.6734		48.6592	1248	47.717	1024	45.2491	904		30.3819	656	23.3434	448	18.6901	354		47.2084	24.1384	1.98712	0.990681	0.000565566	0.141473	23	31920840	31932076	-1	si:dkey-126g1.7	si:dkey-126g1.7 [Source:ZFIN;Acc:ZDB-GENE-090313-181]	protein_coding	ENSDART00000138617
ENSDARG00000045753		33.0987		51.8161	1329	49.3937	1060	33.6429	672		18.9973	410	21.834	419	22.9079	434		44.9509	21.2464	2.08982	1.06338	0.000573914	0.141473	4	10972585	11024844	-1	tmtc2a	transmembrane O-mannosyltransferase targeting cadherins 2a [Source:ZFIN;Acc:ZDB-GENE-041210-299]	protein_coding	ENSDART00000067261,ENSDART00000167631
ENSDARG00000057016		38.1487		28.4316	729	31.0428	666	28.09	561		48.1528	1040	51.7614	994	41.4135	785		29.1881	47.1092	-1.60895	-0.686121	0.000575303	0.141473	22	16190231	16275236	-1	cdc14ab	cell division cycle 14Ab [Source:NCBI gene;Acc:565969]	protein_coding	ENSDART00000105681,ENSDART00000149051,ENSDART00000171823
ENSDARG00000062251		17.8446		23.9106	613	22.6126	485	20.586	411		14.462	312	13.8186	265	11.678	221		22.3697	13.3196	1.68238	0.750503	0.000578466	0.141473	2	21634128	21734733	1	fbxl7	F-box and leucine-rich repeat protein 7 [Source:NCBI gene;Acc:569430]	protein_coding	ENSDART00000089822
ENSDARG00000092813		18.3575		12.803	328	15.3002	328	12.9819	259		24.5045	529	24.02	461	20.5354	389		13.695	23.02	-1.68534	-0.753036	0.000587726	0.141473	2	45643122	45652375	1	fndc7rs4	fibronectin type III domain containing 7, related sequence 4 [Source:ZFIN;Acc:ZDB-GENE-070912-648]	protein_coding	ENSDART00000138179
ENSDARG00000057317		558.325		460.46	11814	463.826	9958	433.506	8665		656.901	14194	646.041	12412	689.214	13072		452.597	664.052	-1.4674	-0.553263	0.000595086	0.141473	8	18515711	18537882	-1	nexn	nexilin (F actin binding protein) [Source:ZFIN;Acc:ZDB-GENE-041114-92]	protein_coding	ENSDART00000100558,ENSDART00000148802,ENSDART00000148857,ENSDART00000148962,ENSDART00000149081,ENSDART00000149506,ENSDART00000149608,ENSDART00000190530,ENSDART00000192783
ENSDARG00000045788		9.20354		3.87792	99	6.68364	143	4.77755	95		16.2206	350	13.0379	250	10.6236	201		5.11304	13.294	-2.67182	-1.41782	0.000616452	0.144428	4	9207722	9214288	-1	avpr1ab	arginine vasopressin receptor 1Ab [Source:ZFIN;Acc:ZDB-GENE-041210-105]	protein_coding	ENSDART00000067309
ENSDARG00000057698		272.219		332.43	8529	319.86	6867	339.906	6794		188.655	4076	223.727	4298	228.736	4338		330.732	213.706	1.55266	0.634737	0.000653679	0.150963	18	16133595	16146081	1	ctsd	cathepsin D [Source:ZFIN;Acc:ZDB-GENE-010131-8]	protein_coding	ENSDART00000080423,ENSDART00000148584,ENSDART00000149598
ENSDARG00000004497		2.48895		4.03382	103	3.37675	72	3.32677	66		1.36522	29	1.22312	23	1.60803	30		3.57912	1.39879	2.58564	1.37052	0.000668761	0.15227	4	14957360	14968641	1	tspan33a	tetraspanin 33a [Source:NCBI gene;Acc:436890]	protein_coding	ENSDART00000002770,ENSDART00000111882,ENSDART00000148292
ENSDARG00000068973		30.3875		22.9752	589	25.2208	541	24.5381	490		34.1767	738	39.0617	750	36.3521	689		24.2447	36.5302	-1.50648	-0.591179	0.00068719	0.153387	21	43738398	43801511	-1	pdlim4	PDZ and LIM domain 4 [Source:ZFIN;Acc:ZDB-GENE-070308-5]	protein_coding	ENSDART00000099978,ENSDART00000138710
ENSDARG00000087749		33.9563		27.1065	695	28.7606	617	25.1884	503		39.3136	849	39.5302	759	43.8387	831		27.0185	40.8942	-1.5129	-0.59732	0.00069264	0.153387	17	26477611	26538075	-1	ccser2a	coiled-coil serine-rich protein 2a [Source:ZFIN;Acc:ZDB-GENE-131121-492]	protein_coding	ENSDART00000122366,ENSDART00000155616,ENSDART00000155692
ENSDARG00000076140		1.11612		1.53948	39	1.79317	38	2.02608	40		0.393368	8	0.33831	6	0.606308	11		1.78624	0.445995	4.08353	2.02982	0.000726347	0.154991	14	22022441	22038396	1	clcf1	cardiotrophin-like cytokine factor 1 [Source:ZFIN;Acc:ZDB-GENE-110411-244]	protein_coding	ENSDART00000149121
ENSDARG00000056122		26.8644		31.9393	819	30.6702	658	37.3449	746		22.5145	486	18.8673	362	19.85	376		33.3181	20.4106	1.62724	0.702427	0.000734349	0.154991	23	26063149	26077038	-1	gdi1	GDP dissociation inhibitor 1 [Source:ZFIN;Acc:ZDB-GENE-050522-504]	protein_coding	ENSDART00000126299
ENSDARG00000036893		100.059		116.63	2992	121.726	2613	133.346	2665		88.1838	1905	72.0079	1383	68.4601	1298		123.901	76.2173	1.6332	0.707705	0.000736133	0.154991	7	8267985	8344243	-1	f13a1b	coagulation factor XIII, A1 polypeptide b [Source:ZFIN;Acc:ZDB-GENE-030131-9634]	protein_coding	ENSDART00000102535,ENSDART00000149510,ENSDART00000182530,ENSDART00000184049
ENSDARG00000088709		5.83494		8.1261	208	8.96586	192	7.1288	142		3.86426	83	2.68045	51	4.24416	80		8.07359	3.59629	2.27825	1.18793	0.000738234	0.154991	18	39522468	39583601	-1	tnfaip8l3	tumor necrosis factor, alpha-induced protein 8-like 3 [Source:NCBI gene;Acc:393322]	protein_coding	ENSDART00000125116
ENSDARG00000067848		302.718		258.067	6621	220.513	4734	198.831	3974		366.457	7918	426.556	8195	345.886	6560		225.804	379.633	-1.68469	-0.75248	0.00076887	0.159353	2	55982300	55990329	1	nmrk2	nicotinamide riboside kinase 2 [Source:ZFIN;Acc:ZDB-GENE-040912-44]	protein_coding	ENSDART00000097751,ENSDART00000097753,ENSDART00000132433,ENSDART00000137432,ENSDART00000140440,ENSDART00000141688,ENSDART00000183599,ENSDART00000183903
ENSDARG00000011510		63.7511		74.577	1913	75.7091	1625	80.4679	1608		50.1428	1083	55.8731	1073	45.7367	867		76.918	50.5842	1.52491	0.60872	0.000787166	0.16108	23	21520769	21535040	-1	rcc2	regulator of chromosome condensation 2 [Source:NCBI gene;Acc:406455]	protein_coding	ENSDART00000010647,ENSDART00000134587,ENSDART00000139092,ENSDART00000189010
ENSDARG00000007219		178.621		207.518	5324	223.355	4795	246.606	4929		153.575	3318	130.718	2511	109.953	2085		225.826	131.415	1.73045	0.791151	0.000803438	0.162339	13	36321088	36391502	-1	actn1	actinin, alpha 1 [Source:ZFIN;Acc:ZDB-GENE-081113-4]	protein_coding	ENSDART00000100217,ENSDART00000133740,ENSDART00000133858,ENSDART00000135741,ENSDART00000140243
ENSDARG00000045544		6.26674		9.10046	233	8.77955	188	7.02875	140		4.46588	96	3.98164	76	4.24416	80		8.30292	4.23056	1.96263	0.972788	0.000831024	0.162339	4	19710657	19742303	-1	hgfa	hepatocyte growth factor a [Source:ZFIN;Acc:ZDB-GENE-041014-2]	protein_coding	ENSDART00000066964,ENSDART00000100952
ENSDARG00000074752		40.4699		34.4726	884	33.3716	716	29.6908	593		48.6619	1051	46.0882	885	50.5345	958		32.5117	48.4282	-1.49036	-0.57566	0.000835769	0.162339	3	11585298	11624694	-1	hlfa	HLF transcription factor, PAR bZIP family member a [Source:ZFIN;Acc:ZDB-GENE-061013-159]	protein_coding	ENSDART00000127157
ENSDARG00000074441		33.4376		44.6449	1145	49.2074	1056	42.9979	859		14.462	312	27.0908	520	22.2225	421		45.6167	21.2584	2.22587	1.15437	0.000840024	0.162339	8	4576132	4586696	-1	gp1bb	glycoprotein Ib platelet subunit beta [Source:ZFIN;Acc:ZDB-GENE-081104-406]	protein_coding	ENSDART00000134324,ENSDART00000143511
ENSDARG00000041779		161.583		114.798	2945	130.343	2798	104.03	2079		245.531	5305	175.583	3373	199.212	3778		116.39	206.775	-1.76692	-0.821239	0.000857933	0.162339	20	40150612	40231379	1	trdn	triadin [Source:ZFIN;Acc:ZDB-GENE-041014-193]	protein_coding	ENSDART00000101041,ENSDART00000109681,ENSDART00000121818,ENSDART00000143680,ENSDART00000153203
ENSDARG00000071445		8.07506		6.41124	164	5.19321	111	5.32784	106		10.7598	232	9.23845	177	11.5199	218		5.6441	10.506	-1.84967	-0.887266	0.000858399	0.162339	12	26385096	26408876	-1	myoz1b	myozenin 1b [Source:ZFIN;Acc:ZDB-GENE-040718-146]	protein_coding	ENSDART00000105636,ENSDART00000131896,ENSDART00000178687
ENSDARG00000062129		108.634		129.297	3317	144.735	3107	128.744	2573		79.576	1719	73.1529	1405	96.2975	1826		134.258	83.0088	1.62585	0.701191	0.000869537	0.162339	23	29889089	29906163	1	mxra8b	matrix-remodelling associated 8b [Source:ZFIN;Acc:ZDB-GENE-061013-368]	protein_coding	ENSDART00000089465,ENSDART00000149378
ENSDARG00000039256		89.7235		74.3042	1906	71.2378	1529	59.7569	1194		107.945	2332	124.108	2384	100.99	1915		68.4329	111.014	-1.62338	-0.698999	0.000889872	0.162339	6	21095918	21155195	1	spega	striated muscle enriched protein kinase a [Source:NCBI gene;Acc:570504]	protein_coding	ENSDART00000167225
ENSDARG00000100753		351.012		291.468	7478	299.087	6421	257.562	5148		433.329	9363	398.763	7661	425.866	8077		282.706	419.319	-1.4855	-0.570946	0.000893923	0.162339	KN150405.1	1010	65756	-1		scavenger receptor class B, member 2b [Source:NCBI gene;Acc:564077]	protein_coding	ENSDART00000160124,ENSDART00000184345
ENSDARG00000069660		23.6485		16.8563	432	16.5577	355	17.7845	355		34.223	739	32.2435	619	24.226	459		17.0662	30.2308	-1.7565	-0.812706	0.000905262	0.162339	7	22543963	22580026	1	chrnb1	cholinergic receptor, nicotinic, beta 1 (muscle) [Source:ZFIN;Acc:ZDB-GENE-070821-4]	protein_coding	ENSDART00000101528,ENSDART00000149774
ENSDARG00000015627		1.84655		1.07179	27	1.00138	21	1.1256	22		2.79985	60	2.57636	49	2.50432	47		1.06626	2.62684	-2.47067	-1.3049	0.000919304	0.162339	20	28511941	28642061	-1	rgs6	regulator of G protein signaling 6 [Source:ZFIN;Acc:ZDB-GENE-030131-31]	protein_coding	ENSDART00000135513,ENSDART00000184779
ENSDARG00000027017		29.5302		26.5219	680	19.3057	414	20.4859	409		35.9816	777	39.1138	751	35.7722	678		22.1045	36.9558	-1.68004	-0.748496	0.000933222	0.162339	20	13175379	13311918	1	ppp2r5a	protein phosphatase 2, regulatory subunit B', alpha isoform [Source:ZFIN;Acc:ZDB-GENE-040724-174]	protein_coding	ENSDART00000025644
ENSDARG00000074156		25.9985		19.4676	499	20.7961	446	17.1341	342		28.6696	619	31.4628	604	38.461	729		19.1326	32.8645	-1.70587	-0.77051	0.000934167	0.162339	12	3078221	3093024	1	sgca	sarcoglycan, alpha [Source:ZFIN;Acc:ZDB-GENE-041111-121]	protein_coding	ENSDART00000148835,ENSDART00000149427
ENSDARG00000102277		5.54105		6.80098	174	7.19597	154	7.67909	153		3.86426	83	3.40912	65	4.29688	81		7.22535	3.85675	1.87277	0.905171	0.000939913	0.162339	24	41690545	41784173	1	lama1	laminin, alpha 1 [Source:ZFIN;Acc:ZDB-GENE-060118-1]	protein_coding	ENSDART00000160069
ENSDARG00000013921		117.714		103.301	2650	91.9175	1973	92.3242	1845		140.247	3030	145.291	2791	133.203	2526		95.8475	139.58	-1.45762	-0.543618	0.000943948	0.162339	15	31806303	31910235	1	frya	furry homolog a (Drosophila) [Source:ZFIN;Acc:ZDB-GENE-060510-4]	protein_coding	ENSDART00000045921,ENSDART00000155315,ENSDART00000155902,ENSDART00000156706,ENSDART00000180401,ENSDART00000186634,ENSDART00000189658,ENSDART00000192525,ENSDART00000193032
ENSDARG00000053222		106.101		77.8508	1997	89.7284	1926	55.4546	1108		137.239	2965	136.963	2631	139.372	2643		74.3446	137.858	-1.89126	-0.919346	0.000983041	0.162544	1	38804961	38816685	-1	asb5b	ankyrin repeat and SOCS box containing 5b [Source:ZFIN;Acc:ZDB-GENE-050417-271]	protein_coding	ENSDART00000075230,ENSDART00000148572,ENSDART00000148790,ENSDART00000148917,ENSDART00000149080,ENSDART00000149809
ENSDARG00000030598		49.9368		37.7854	969	40.7772	875	34.6935	693		71.3847	1542	53.4269	1026	61.5535	1167		37.752	62.1217	-1.63728	-0.711305	0.000983717	0.162544	4	3358383	3385452	1	nampta	nicotinamide phosphoribosyltransferase a [Source:ZFIN;Acc:ZDB-GENE-110420-1]	protein_coding	ENSDART00000075320
ENSDARG00000020984		26.7137		34.5895	887	29.0866	624	39.1959	783		16.6834	360	22.4585	431	18.2683	346		34.2907	19.1368	1.79559	0.844456	0.00100202	0.162544	20	122123	147578	-1	slc16a10	solute carrier family 16 member 10 [Source:NCBI gene;Acc:566499]	protein_coding	ENSDART00000104762,ENSDART00000131635
ENSDARG00000042213		168.135		133.272	3419	147.576	3168	118.488	2368		193.051	4171	201.502	3871	214.923	4076		133.112	203.159	-1.53096	-0.614433	0.00100319	0.162544	18	8917766	8955573	1	si:ch211-233h19.2	si:ch211-233h19.2 [Source:ZFIN;Acc:ZDB-GENE-061009-14]	protein_coding	ENSDART00000145226
ENSDARG00000042904		78.1933		67.016	1719	51.5362	1106	57.5557	1150		111.647	2412	90.4848	1738	90.9199	1724		58.7026	97.6839	-1.66545	-0.735913	0.00100939	0.162544	20	32286765	32332736	-1	foxo3b	forkhead box O3b [Source:ZFIN;Acc:ZDB-GENE-990708-6]	protein_coding	ENSDART00000062982
ENSDARG00000092945		158.065		255.69	6560	179.34	3850	204.284	4083		76.9844	1663	121.557	2335	110.533	2096		213.105	103.025	2.08364	1.05911	0.00102051	0.162544	19	37509638	37519610	1	si:ch211-250g4.3	si:ch211-250g4.3 [Source:ZFIN;Acc:ZDB-GENE-060503-506]	protein_coding	ENSDART00000139999
ENSDARG00000056985		37.9685		46.0479	1181	41.1032	882	52.603	1051		27.0961	585	31.4628	604	29.4982	559		46.5847	29.3524	1.58287	0.662541	0.00105124	0.162544	10	24690534	24707956	1	tpte	transmembrane phosphatase with tensin homology [Source:ZFIN;Acc:ZDB-GENE-030131-5503]	protein_coding	ENSDART00000079549,ENSDART00000139930,ENSDART00000144710,ENSDART00000181600
ENSDARG00000034801		55.8161		91.3748	2344	74.8241	1606	58.156	1162		43.6175	942	31.0464	596	35.8776	680		74.785	36.8472	2.01302	1.00936	0.00105173	0.162544	9	4024250	4075620	-1	mylka	myosin, light chain kinase a [Source:ZFIN;Acc:ZDB-GENE-030131-8207]	protein_coding	ENSDART00000046903
ENSDARG00000017246		68.4914		60.6632	1556	55.4952	1191	52.1528	1042		79.8999	1726	82.6256	1587	80.1118	1519		56.1037	80.8791	-1.44417	-0.530239	0.00106374	0.162544	18	46211210	46241856	-1	prx	periaxin [Source:ZFIN;Acc:ZDB-GENE-030131-5790]	protein_coding	ENSDART00000134244,ENSDART00000145999,ENSDART00000181855,ENSDART00000185021
ENSDARG00000078416		9.22661		11.8286	303	11.7604	252	10.9809	219		7.79794	168	6.42788	123	6.56394	124		11.5233	6.92992	1.6646	0.73518	0.00106427	0.162544	6	840434	957906	-1	zeb2b	zinc finger E-box binding homeobox 2b [Source:ZFIN;Acc:ZDB-GENE-080717-1]	protein_coding	ENSDART00000090019,ENSDART00000171091,ENSDART00000184286
ENSDARG00000074656		87.0818		91.3358	2343	125.406	2692	133.396	2666		45.2836	978	68.4686	1315	58.601	1111		116.713	57.4511	2.03435	1.02457	0.001071	0.162544	16	29509133	29513434	1	ctss2.1	cathepsin S, ortholog2, tandem duplicate 1 [Source:ZFIN;Acc:ZDB-GENE-050522-559]	protein_coding	ENSDART00000112116,ENSDART00000148450
ENSDARG00000055377		25.6997		22.8973	587	19.0728	409	18.5349	370		29.6414	640	32.9722	633	31.0799	589		20.1683	31.2312	-1.54825	-0.630635	0.00108643	0.162544	18	39067575	39105519	1	gnb5b	guanine nucleotide binding protein (G protein), beta 5b [Source:NCBI gene;Acc:393719]	protein_coding	ENSDART00000077724,ENSDART00000142390
ENSDARG00000042977		41.458		36.2264	929	32.0209	687	33.6429	672		49.8189	1076	46.5045	893	50.5345	958		33.9634	48.9526	-1.44169	-0.527757	0.00110435	0.162544	10	5414224	5419256	1	nfil3	nuclear factor, interleukin 3 regulated [Source:NCBI gene;Acc:445509]	protein_coding	ENSDART00000138821
ENSDARG00000094210		11.8667		16.0378	411	18.281	392	12.7818	255		9.32513	201	7.2086	138	7.56567	143		15.7002	8.03313	1.9427	0.958064	0.00112096	0.162544	3	32118670	32120354	1	fthl31	ferritin, heavy polypeptide-like 31 [Source:ZFIN;Acc:ZDB-GENE-050522-428]	protein_coding	ENSDART00000055287,ENSDART00000111688,ENSDART00000133754
ENSDARG00000042934		333.153		411.002	10545	389.304	8358	600.395	12001		163.479	3532	269.32	5174	165.417	3137		466.9	199.405	2.36329	1.2408	0.00112273	0.162544	20	25340814	25343490	1	ccn2a	cellular communication network factor 2a [Source:ZFIN;Acc:ZDB-GENE-030131-102]	protein_coding	ENSDART00000063028
ENSDARG00000031698		238.369		210.246	5394	194.757	4181	170.266	3403		286.025	6180	289.151	5555	279.772	5306		191.756	284.982	-1.49178	-0.577036	0.00112278	0.162544	23	32039386	32060885	1	mylk2	myosin light chain kinase 2 [Source:ZFIN;Acc:ZDB-GENE-080616-2]	protein_coding	ENSDART00000048628,ENSDART00000133801
ENSDARG00000015793		3.75561		4.8133	123	5.00691	107	5.07771	101		2.29079	49	2.52431	48	2.82065	53		4.96597	2.54525	1.96113	0.971686	0.00112738	0.162544	7	38897836	38954874	1	creb3l1	cAMP responsive element binding protein 3-like 1 [Source:ZFIN;Acc:ZDB-GENE-030219-181]	protein_coding	ENSDART00000024330,ENSDART00000172251,ENSDART00000173945
ENSDARG00000011821		223.28		282.27	7242	231.459	4969	306.088	6118		171.069	3696	172.148	3307	176.647	3350		273.272	173.288	1.56652	0.647561	0.00113797	0.162544	24	5237709	5314707	1	plod2	procollagen-lysine, 2-oxoglutarate 5-dioxygenase 2 [Source:ZFIN;Acc:ZDB-GENE-070326-1]	protein_coding	ENSDART00000005901,ENSDART00000106488,ENSDART00000128182,ENSDART00000140035
ENSDARG00000102986		39.3077		45.3464	1163	55.2623	1186	45.7494	914		26.4019	570	34.2734	658	28.8128	546		48.786	29.8294	1.63989	0.713596	0.00115171	0.162544	14	3143337	3180947	-1	csf1ra	colony stimulating factor 1 receptor, a [Source:NCBI gene;Acc:64274]	protein_coding	ENSDART00000163585,ENSDART00000169652,ENSDART00000183810,ENSDART00000184370
ENSDARG00000087911		55.1896		26.366	676	46.3197	994	38.3955	767		67.0808	1449	75.1307	1443	77.8447	1476		37.0271	73.3521	-2.03359	-1.02403	0.00117802	0.162544	13	35689749	35744963	1	psme4a	proteasome activator subunit 4a [Source:NCBI gene;Acc:793897]	protein_coding	ENSDART00000128865,ENSDART00000130050,ENSDART00000158726
ENSDARG00000055575		105.021		154.474	3963	120.282	2582	145.202	2902		50.837	1098	84.9157	1631	74.4177	1411		139.986	70.0568	2.03248	1.02324	0.0011824	0.162544	24	5871589	5910811	-1	pcolce2b	procollagen C-endopeptidase enhancer 2b [Source:ZFIN;Acc:ZDB-GENE-040426-1177]	protein_coding	ENSDART00000077951,ENSDART00000163012
ENSDARG00000095019		26.4148		36.4213	934	28.6209	614	33.5429	670		17.7015	382	22.5106	432	19.6918	373		32.8617	19.968	1.64955	0.722075	0.00119064	0.162544	18	38288877	38296665	1	lmo2	LIM domain only 2 (rhombotin-like 1) [Source:NCBI gene;Acc:30332]	protein_coding	ENSDART00000134247
ENSDARG00000098592		22.5423		28.8214	739	27.5962	592	25.7387	514		17.609	380	19.8562	381	15.6322	296		27.3854	17.6991	1.5541	0.636081	0.00119212	0.162544	8	19398335	19467011	-1	zgc:92140	zgc:92140 [Source:ZFIN;Acc:ZDB-GENE-040912-161]	protein_coding	ENSDART00000162010,ENSDART00000184037
ENSDARG00000061120		18.3634		23.365	599	21.8208	468	24.7882	495		13.2125	285	16.2649	312	10.729	203		23.3247	13.4021	1.76149	0.816792	0.00119413	0.162544	10	24371921	24391716	-1	slc43a2b	solute carrier family 43 member 2b [Source:ZFIN;Acc:ZDB-GENE-041212-6]	protein_coding	ENSDART00000100772,ENSDART00000137749,ENSDART00000141332,ENSDART00000177914,ENSDART00000180013
ENSDARG00000052059		13.9457		9.3343	239	5.19321	111	8.42949	168		26.4945	572	15.7965	303	18.4265	349		7.65234	20.2391	-2.65319	-1.40773	0.00120086	0.162544	7	50876581	50883433	-1		si:dkey-37f13.4 [Source:NCBI gene;Acc:101886606]	protein_coding	ENSDART00000174314
ENSDARG00000104836		1558.23		1197.07	30714	1372.43	29466	1138.53	22758		1769.16	38228	1820.29	34973	2051.93	38919		1236.01	1880.46	-1.52307	-0.606982	0.00120656	0.162544	7	71688710	71758613	-1	myom1b	myomesin 1b [Source:ZFIN;Acc:ZDB-GENE-080416-2]	protein_coding	ENSDART00000161067,ENSDART00000162609,ENSDART00000165253,ENSDART00000166724
ENSDARG00000095695		18.9825		21.806	559	26.8044	575	23.4875	469		11.3151	244	15.6403	300	14.8414	281		24.0327	13.9323	1.74121	0.800088	0.00123438	0.163689	4	76745015	76751266	1	ms4a17a.10	membrane-spanning 4-domains, subfamily A, member 17A.10 [Source:ZFIN;Acc:ZDB-GENE-080829-3]	protein_coding	ENSDART00000075607,ENSDART00000155883
ENSDARG00000069922		865.193		730.628	18746	726.327	15594	655.324	13099		1081.09	23360	1047.07	20117	950.718	18032		704.093	1026.29	-1.45729	-0.543293	0.00124187	0.163689	9	21222428	21231297	-1	popdc2	popeye domain containing 2 [Source:NCBI gene;Acc:793666]	protein_coding	ENSDART00000102147,ENSDART00000150160,ENSDART00000162578
ENSDARG00000060006		58.7461		50.1402	1286	49.3471	1059	42.2475	844		72.4491	1565	73.0488	1403	65.244	1237		47.245	70.2473	-1.48899	-0.574333	0.00124544	0.163689	21	10890258	11054876	-1	nedd4l	NEDD4 like E3 ubiquitin protein ligase [Source:ZFIN;Acc:ZDB-GENE-051118-2]	protein_coding	ENSDART00000084061,ENSDART00000146576,ENSDART00000191378
ENSDARG00000062220		29.6677		20.8706	535	27.2702	585	19.5854	391		38.6657	835	35.2623	677	36.3521	689		22.5754	36.76	-1.64507	-0.718147	0.00126534	0.164387	7	27059330	27231592	1	plekha7b	pleckstrin homology domain containing, family A member 7b [Source:ZFIN;Acc:ZDB-GENE-091014-2]	protein_coding	ENSDART00000173583,ENSDART00000173829,ENSDART00000173919,ENSDART00000173987
ENSDARG00000016156		63.7195		77.8898	1998	69.3282	1488	83.0193	1659		45.7001	987	53.9474	1036	52.4325	994		76.7457	50.6933	1.51388	0.598248	0.00127916	0.164387	12	46883785	46937956	1	fam53b	family with sequence similarity 53 member B [Source:NCBI gene;Acc:406586]	protein_coding	ENSDART00000008312,ENSDART00000134428,ENSDART00000135393
ENSDARG00000021151		12.0347		18.0255	462	13.2043	283	16.1836	323		9.51024	205	8.50979	163	6.77483	128		15.8045	8.26495	1.91209	0.935148	0.00128126	0.164387	17	29319587	29343657	1	ptpreb	protein tyrosine phosphatase receptor type Eb [Source:ZFIN;Acc:ZDB-GENE-060503-263]	protein_coding	ENSDART00000143444
ENSDARG00000024365		9.54163		14.362	368	9.80422	210	15.2331	304		5.0675	109	6.27174	120	6.51122	123		13.1331	5.95015	2.19395	1.13353	0.00130237	0.165781	2	41876595	41920632	1	crlf1a	cytokine receptor-like factor 1a [Source:ZFIN;Acc:ZDB-GENE-040718-397]	protein_coding	ENSDART00000112243,ENSDART00000138013
ENSDARG00000104441		754.158		683.236	17530	562.287	12072	562.425	11242		957.11	20681	893.528	17167	866.362	16432		602.649	905.666	-1.50816	-0.592786	0.00133359	0.168429	23	24258323	24263474	-1	hspb7	heat shock protein family, member 7 (cardiovascular) [Source:ZFIN;Acc:ZDB-GENE-041010-136]	protein_coding	ENSDART00000160312
ENSDARG00000056722		58.7985		74.3431	1907	65.2295	1400	70.8128	1415		43.7564	945	52.438	1007	46.2112	876		70.1285	47.4685	1.47965	0.565261	0.00138388	0.171392	7	25878553	25895472	-1	cd99l2	CD99 molecule-like 2 [Source:NCBI gene;Acc:323266]	protein_coding	ENSDART00000079235,ENSDART00000079245,ENSDART00000173505,ENSDART00000173599,ENSDART00000173602,ENSDART00000173786,ENSDART00000187568
ENSDARG00000002249		23.0239		18.9219	485	18.4673	396	18.5349	370		25.9854	561	25.9978	499	30.2363	573		18.6414	27.4065	-1.465	-0.550904	0.00139531	0.171392	18	12655766	12834323	1	tbxas1	thromboxane A synthase 1 (platelet) [Source:ZFIN;Acc:ZDB-GENE-030131-8805]	protein_coding	ENSDART00000144246
ENSDARG00000059202		3.13245		4.38459	112	3.74936	80	4.82757	96		2.01312	43	2.21202	42	1.60803	30		4.32051	1.94439	2.2229	1.15244	0.0014165	0.171392	23	423351	452365	-1	tspan2b	tetraspanin 2b [Source:ZFIN;Acc:ZDB-GENE-100922-60]	protein_coding	ENSDART00000146776,ENSDART00000192106
ENSDARG00000069017		92.1772		126.802	3253	179.992	3864	91.1236	1821		45.6075	985	42.1846	810	67.3529	1277		132.639	51.715	2.52264	1.33493	0.00143225	0.171392	21	40839857	40880353	-1	elnb	elastin b [Source:ZFIN;Acc:ZDB-GENE-061212-2]	protein_coding	ENSDART00000100054,ENSDART00000137696
ENSDARG00000068231		72.651		64.054	1643	58.0568	1246	54.8542	1096		86.055	1859	92.8269	1783	80.059	1518		58.9883	86.3136	-1.46357	-0.549492	0.00145071	0.171392	18	11556620	11595567	-1		calcium release activated channel regulator 2Aa [Source:NCBI gene;Acc:100330395]	protein_coding	ENSDART00000098565
ENSDARG00000032868		150.846		132.921	3410	124.148	2665	118.438	2367		183.379	3962	177.925	3418	168.264	3191		125.169	176.522	-1.41103	-0.496748	0.0014665	0.171392	6	30851545	30954268	-1	pde4ba	phosphodiesterase 4B, cAMP-specific a [Source:ZFIN;Acc:ZDB-GENE-030131-9570]	protein_coding	ENSDART00000028612,ENSDART00000153851,ENSDART00000154523,ENSDART00000155330,ENSDART00000156235
ENSDARG00000101380		3.10466		3.72203	95	5.14663	110	4.67749	93		2.15195	46	1.7436	33	1.18626	22		4.51539	1.69393	2.66995	1.41681	0.00147246	0.171392	5	57641554	57650998	1	cryabb	crystallin, alpha B, b [Source:ZFIN;Acc:ZDB-GENE-040718-419]	protein_coding	ENSDART00000157992,ENSDART00000164742,ENSDART00000171309
ENSDARG00000052330		8.74737		11.5948	297	10.5029	225	10.5306	210		6.45586	139	7.46883	143	5.93128	112		10.8761	6.61866	1.65424	0.726167	0.00148317	0.171392	24	33301129	33366188	-1	slc4a2b	solute carrier family 4 member 2b [Source:ZFIN;Acc:ZDB-GENE-030429-14]	protein_coding	ENSDART00000074161,ENSDART00000149711
ENSDARG00000052708		2597.77		2206.23	56607	2236.64	48021	1949.41	38967		3029.7	65466	2945.14	56585	3219.52	61065		2130.76	3064.79	-1.44015	-0.526216	0.00148854	0.171392	6	54805136	54826061	-1	tnni1b	troponin I type 1b (skeletal, slow) [Source:ZFIN;Acc:ZDB-GENE-041212-37]	protein_coding	ENSDART00000007498,ENSDART00000149982,ENSDART00000150079,ENSDART00000180793
ENSDARG00000060927		49.8552		69.7442	1789	56.4267	1211	59.2566	1184		37.8327	817	32.2435	619	43.6278	827		61.8091	37.9013	1.63644	0.710557	0.0014935	0.171392	18	49225552	49247479	1	si:ch211-136a13.1	si:ch211-136a13.1 [Source:ZFIN;Acc:ZDB-GENE-050419-214]	protein_coding	ENSDART00000135026
ENSDARG00000034173		1.70077		2.39691	61	2.25893	48	2.57637	51		1.08755	23	1.01493	19	0.86992	16		2.41074	0.990798	2.42903	1.28038	0.00149993	0.171392	4	25410293	25441127	1	prkcq	protein kinase C, theta [Source:ZFIN;Acc:ZDB-GENE-041210-195]	protein_coding	ENSDART00000046253,ENSDART00000123680,ENSDART00000176982
ENSDARG00000017474		62.7915		48.1135	1234	53.3527	1145	38.3454	766		88.0912	1903	80.4916	1546	68.3547	1296		46.6039	78.9792	-1.70075	-0.766174	0.00151819	0.171392	7	38811800	38822387	1	zgc:110699	zgc:110699 [Source:ZFIN;Acc:ZDB-GENE-050522-487]	protein_coding	ENSDART00000052322
ENSDARG00000051814		1.22288		1.46153	37	2.30551	49	2.02608	40		0.393368	8	0.702643	13	0.448141	8		1.93104	0.514717	3.77474	1.91638	0.00154506	0.171392	25	28340171	28443607	-1	ptprz1a	protein tyrosine phosphatase receptor type Z1a [Source:ZFIN;Acc:ZDB-GENE-090406-1]	protein_coding	ENSDART00000073500,ENSDART00000157243
ENSDARG00000029168		46.7711		37.3177	957	36.0264	773	38.3955	767		63.9801	1382	49.6274	953	55.2795	1048		37.2465	56.2957	-1.504	-0.588804	0.00154948	0.171392	25	15933411	16042941	1	ppfibp2b	PPFIA binding protein 2b [Source:ZFIN;Acc:ZDB-GENE-040718-54]	protein_coding	ENSDART00000089035,ENSDART00000126641,ENSDART00000140047,ENSDART00000144723,ENSDART00000191581
ENSDARG00000073684		65.162		93.3235	2394	81.5776	1751	76.916	1537		59.9076	1294	40.2588	773	38.9882	739		83.9391	46.3849	1.83841	0.878456	0.00156022	0.171392	6	2030703	2092659	1	quo	quattro [Source:ZFIN;Acc:ZDB-GENE-030131-9944]	protein_coding	ENSDART00000109679,ENSDART00000153568,ENSDART00000187502,ENSDART00000187544,ENSDART00000191165
ENSDARG00000090973		25.3194		21.3383	547	21.355	458	19.0852	381		30.2893	654	27.8195	534	32.0289	607		20.5928	30.0459	-1.45666	-0.542663	0.00156232	0.171392	11	40032790	40072301	1	si:dkey-264d12.1	si:dkey-264d12.1 [Source:ZFIN;Acc:ZDB-GENE-141215-69]	protein_coding	ENSDART00000130278,ENSDART00000158809
ENSDARG00000111714		3.45666		1.96819	50	0.489047	10	0.475253	9		3.81798	82	6.74017	129	7.24934	137		0.977498	5.93583	-6.97963	-2.80315	0.00156836	0.171392	7	59553040	59564011	-1	zgc:112271	zgc:112271 [Source:ZFIN;Acc:ZDB-GENE-050522-443]	protein_coding	ENSDART00000186053
ENSDARG00000054454		39.4945		47.8797	1228	49.0211	1052	45.049	900		36.0741	779	28.4961	547	30.4472	577		47.3166	31.6725	1.49899	0.58399	0.00157271	0.171392	2	40067808	40136024	-1	epha4a	eph receptor A4a [Source:NCBI gene;Acc:64271]	protein_coding	ENSDART00000098632,ENSDART00000148563,ENSDART00000149895,ENSDART00000173665,ENSDART00000176951
ENSDARG00000031776		256.88		295.17	7573	404.162	8677	304.637	6089		221.373	4783	168.973	3246	146.964	2787		334.657	179.103	1.87719	0.908577	0.00157786	0.171392	3	32099507	32100999	1	fthl27	ferritin, heavy polypeptide-like 27 [Source:ZFIN;Acc:ZDB-GENE-040718-72]	protein_coding	ENSDART00000044238,ENSDART00000142856,ENSDART00000145331
ENSDARG00000076796		78.8252		67.2888	1726	64.8569	1392	66.3604	1326		86.3789	1866	93.1392	1789	94.9268	1800		66.1687	91.4816	-1.38163	-0.466369	0.00159247	0.171392	14	33070284	33177997	-1	dlg3	discs, large homolog 3 (Drosophila) [Source:ZFIN;Acc:ZDB-GENE-050208-93]	protein_coding	ENSDART00000074720,ENSDART00000078856,ENSDART00000160173,ENSDART00000163795,ENSDART00000165726,ENSDART00000180583
ENSDARG00000078318		51.594		41.4879	1064	45.6676	980	34.1432	682		64.8594	1401	58.2673	1119	65.1386	1235		40.4329	62.7551	-1.56061	-0.642109	0.00161171	0.171392	1	12231478	12257979	1	tmod1	tropomodulin 1 [Source:ZFIN;Acc:ZDB-GENE-090312-131]	protein_coding	ENSDART00000111485
ENSDARG00000092422		7.56905		4.0728	104	5.05348	108	6.72859	134		10.3895	224	9.75893	187	9.41096	178		5.28495	9.85314	-1.93637	-0.953353	0.00161355	0.171392	13	4445553	4447653	-1			antisense	ENSDART00000135141,ENSDART00000140757
ENSDARG00000101759		34.0297		28.9773	743	26.525	569	28.8404	576		41.8127	903	37.0839	712	40.939	776		28.1142	39.9452	-1.41999	-0.505881	0.00161708	0.171392	5	51774983	51830997	-1	homer1b	homer scaffold protein 1b [Source:ZFIN;Acc:ZDB-GENE-040801-44]	protein_coding	ENSDART00000159166,ENSDART00000163616,ENSDART00000164267
ENSDARG00000035327		2145.09		1276.89	32762	1824.73	39177	1731.15	34604		2777.01	60006	2460.58	47275	2800.17	53111		1610.92	2679.25	-1.67992	-0.748395	0.00163789	0.171392	5	36832079	36837846	-1	ckma	creatine kinase, muscle a [Source:ZFIN;Acc:ZDB-GENE-980526-109]	protein_coding	ENSDART00000032481
ENSDARG00000004782		7.15133		9.21738	236	9.01243	193	8.77968	175		5.48401	118	5.95945	114	4.45505	84		9.00316	5.2995	1.71033	0.774276	0.001652	0.171392	13	13213567	13294872	-1	fgfr3	fibroblast growth factor receptor 3 [Source:NCBI gene;Acc:58129]	protein_coding	ENSDART00000013534,ENSDART00000125883
ENSDARG00000012671		10.0349		11.8676	304	12.3659	265	20.1858	403		5.02122	108	7.1045	136	3.66421	69		14.8064	5.26331	2.80035	1.48561	0.00166589	0.171392	24	3050020	3062610	1	inhbaa	inhibin subunit beta Aa [Source:ZFIN;Acc:ZDB-GENE-000210-21]	protein_coding	ENSDART00000004241
ENSDARG00000006603		109.124		139.157	3570	117.162	2515	140.35	2805		96.7453	2090	77.2647	1484	84.0659	1594		132.223	86.0253	1.53855	0.621568	0.00167242	0.171392	23	5765514	5818992	-1	csrp1a	cysteine and glycine-rich protein 1a [Source:ZFIN;Acc:ZDB-GENE-030909-4]	protein_coding	ENSDART00000019455,ENSDART00000131521,ENSDART00000148730
ENSDARG00000002986		9.03186		11.9845	307	10.5029	225	16.4338	328		3.21636	69	5.59512	107	6.4585	122		12.9737	5.08999	2.63242	1.39639	0.00167617	0.171392	5	25708369	25723079	-1	gda	guanine deaminase [Source:ZFIN;Acc:ZDB-GENE-050522-434]	protein_coding	ENSDART00000014013
ENSDARG00000014746		13.2377		14.5958	374	18.281	392	16.884	337		8.39956	181	10.7478	206	10.5181	199		16.5869	9.88851	1.68246	0.750574	0.00168062	0.171392	3	27982269	28428198	-1	rbfox1	RNA binding fox-1 homolog 1 [Source:NCBI gene;Acc:449554]	protein_coding	ENSDART00000055534,ENSDART00000122037,ENSDART00000150888,ENSDART00000151143,ENSDART00000151178,ENSDART00000151546,ENSDART00000165936,ENSDART00000191573
ENSDARG00000090396		8.44618		10.6204	272	9.66449	207	12.7818	255		4.83611	104	6.94836	133	5.82583	110		11.0223	5.8701	1.88938	0.917912	0.00168073	0.171392	7	5305381	5316968	-1	si:cabz01074946.1	si:cabz01074946.1 [Source:ZFIN;Acc:ZDB-GENE-160113-134]	protein_coding	ENSDART00000124367,ENSDART00000181505
ENSDARG00000075954		100.985		123.489	3168	125.033	2684	133.196	2662		60.6018	1309	69.6137	1337	93.9778	1782		127.239	74.7311	1.73103	0.791629	0.00168601	0.171392	10	38512270	38521710	1	serpinh1a	serpin peptidase inhibitor, clade H (heat shock protein 47), member 1a [Source:ZFIN;Acc:ZDB-GENE-080219-21]	protein_coding	ENSDART00000109752
ENSDARG00000068257		44.9585		81.6313	2094	47.8567	1027	60.9575	1218		17.7478	383	30.1616	579	31.3962	595		63.4818	26.4352	2.43023	1.28109	0.00170297	0.171392	15	43093044	43100399	1	kcne4	potassium voltage-gated channel, Isk-related family, member 4 [Source:ZFIN;Acc:ZDB-GENE-050419-163]	protein_coding	ENSDART00000141125
ENSDARG00000036065		31.3936		41.5269	1065	37.0511	795	35.1437	702		28.1142	607	22.5106	432	24.0151	455		37.9073	24.88	1.5251	0.608908	0.00170693	0.171392	19	27366932	27395531	-1	mgat1b	alpha-1,3-mannosyl-glycoprotein 2-beta-N-acetylglucosaminyltransferase b [Source:ZFIN;Acc:ZDB-GENE-061103-589]	protein_coding	ENSDART00000103940,ENSDART00000181108
ENSDARG00000018461		24.522		29.9516	768	27.4099	588	29.1906	583		18.7197	404	20.4287	392	21.4317	406		28.8507	20.1933	1.43221	0.518244	0.00171937	0.171576	24	7741521	7746478	1	zgc:56095	zgc:56095 [Source:ZFIN;Acc:ZDB-GENE-040426-1948]	protein_coding	ENSDART00000009687,ENSDART00000189956,ENSDART00000193229
ENSDARG00000040072		82.3942		92.1153	2363	93.0819	1998	108.233	2163		72.5416	1567	63.9405	1228	64.4532	1222		97.81	66.9784	1.4589	0.544877	0.0017335	0.171925	3	36127287	36138174	1	scpep1	serine carboxypeptidase 1 [Source:ZFIN;Acc:ZDB-GENE-040426-890]	protein_coding	ENSDART00000058605,ENSDART00000182500
ENSDARG00000034375		8.4256		9.76302	250	10.0837	216	11.4311	228		6.13191	132	6.89631	132	6.24761	118		10.4259	6.42528	1.61682	0.693158	0.00175278	0.172455	4	9103182	9173552	-1	chst11	carbohydrate (chondroitin 4) sulfotransferase 11 [Source:NCBI gene;Acc:404232]	protein_coding	ENSDART00000042963
ENSDARG00000117609		14.0079		19.3896	497	20.0043	429	16.2837	325		8.81607	190	12.6736	243	6.88028	130		18.5592	9.45665	2.02294	1.01646	0.00176148	0.172455	KN150127.1	27702	32057	-1			lincRNA	ENSDART00000194868
ENSDARG00000054619		13.215		6.64509	170	8.91928	191	7.37893	147		22.6071	488	12.4134	238	21.3262	404		7.64777	18.7822	-2.41335	-1.27104	0.00177085	0.172455	5	38837429	39086768	1	fras1	Fraser extracellular matrix complex subunit 1 [Source:ZFIN;Acc:ZDB-GENE-060526-68]	protein_coding	ENSDART00000076845,ENSDART00000097856,ENSDART00000137112,ENSDART00000144008,ENSDART00000160236
ENSDARG00000020953		240.817		216.988	5567	192.149	4125	167.764	3353		308.886	6674	285.351	5482	273.761	5192		192.301	289.333	-1.51109	-0.595593	0.0017975	0.173902	7	40536928	40578733	-1	dnajb6b	DnaJ heat shock protein family (Hsp40) member B6b [Source:ZFIN;Acc:ZDB-GENE-040426-1122]	protein_coding	ENSDART00000010035,ENSDART00000173661,ENSDART00000173813,ENSDART00000173926
ENSDARG00000102706		925.055		803.861	20625	628.751	13499	765.983	15311		1193.73	25794	1027.39	19739	1130.61	21444		732.865	1117.24	-1.53005	-0.613583	0.00183756	0.173902	7	44730625	44734005	1			lincRNA	ENSDART00000158920
ENSDARG00000076532		355.216		455.042	11675	386.836	8305	469.876	9392		305.878	6609	285.663	5488	227.998	4324		437.251	273.18	1.60737	0.684702	0.00184463	0.173902	11	40677616	40696136	-1	si:ch211-222l21.1	si:ch211-222l21.1 [Source:ZFIN;Acc:ZDB-GENE-030131-247]	protein_coding	ENSDART00000110622,ENSDART00000159713,ENSDART00000165163,ENSDART00000166372,ENSDART00000173071
ENSDARG00000044356		11.9676		9.76302	250	9.75765	209	8.37947	167		15.3413	331	13.09	251	15.474	293		9.30004	14.6351	-1.56865	-0.649526	0.00186347	0.173902	6	28795780	28914225	1	tp63	tumor protein p63 [Source:ZFIN;Acc:ZDB-GENE-030819-1]	protein_coding	ENSDART00000065135,ENSDART00000065137,ENSDART00000123189,ENSDART00000127965,ENSDART00000130799,ENSDART00000163541,ENSDART00000168237,ENSDART00000181512
ENSDARG00000093748		11.1268		14.1671	363	14.5084	311	18.785	375		3.7717	81	5.95945	114	9.56912	181		15.8202	6.43343	2.64688	1.40429	0.00186408	0.173902	1	52441080	52443379	-1	si:ch211-217k17.11	si:ch211-217k17.11 [Source:ZFIN;Acc:ZDB-GENE-030131-8636]	protein_coding	ENSDART00000144676
ENSDARG00000056111		1.53465		3.05947	78	2.44523	52	1.876	37		0.671039	14	0.286262	5	0.86992	16		2.46023	0.609074	4.43394	2.14859	0.00187839	0.173902	8	28297066	28304534	-1	lmod1a	leiomodin 1a (smooth muscle) [Source:ZFIN;Acc:ZDB-GENE-081104-348]	protein_coding	ENSDART00000078545
ENSDARG00000044129		15.933		20.7147	531	16.2783	349	22.9873	459		11.7316	253	11.997	230	11.8889	225		19.9934	11.8725	1.66681	0.737093	0.00190192	0.173902	17	25585487	25586858	-1		si:ch211-214p16.1 [Source:NCBI gene;Acc:368901]	processed_transcript	ENSDART00000139570
ENSDARG00000031325		3.75583		5.35894	137	4.96033	106	4.47739	89		2.66102	57	2.8366	54	2.2407	42		4.93222	2.57944	1.9241	0.944184	0.00190913	0.173902	3	47222096	47235997	-1	tmed1a	transmembrane p24 trafficking protein 1a [Source:ZFIN;Acc:ZDB-GENE-040801-229]	protein_coding	ENSDART00000047071
ENSDARG00000091009		17.6105		12.4522	319	10.27	220	8.92976	178		31.2612	675	16.8895	324	25.8604	490		10.5507	24.6703	-2.27313	-1.18468	0.00192275	0.173902	12	30563550	30567711	1	si:ch211-28p3.4	si:ch211-28p3.4 [Source:ZFIN;Acc:ZDB-GENE-130603-54]	protein_coding	ENSDART00000126064
ENSDARG00000069029		18.8025		16.7784	430	12.6453	271	10.2805	205		27.42	592	21.834	419	23.8569	452		13.2347	24.3703	-1.8525	-0.889474	0.00192415	0.173902	2	54586647	54639964	-1	acss2l	acyl-CoA synthetase short chain family member 2 like [Source:ZFIN;Acc:ZDB-GENE-130530-723]	protein_coding	ENSDART00000100103
ENSDARG00000098578		6.34666		7.81431	200	7.80146	167	7.92923	158		5.16006	111	4.8144	92	4.56049	86		7.84833	4.84499	1.61783	0.694057	0.00192701	0.173902	3	12924930	12970428	-1	pdgfab	platelet-derived growth factor alpha polypeptide b [Source:ZFIN;Acc:ZDB-GENE-060929-124]	protein_coding	ENSDART00000158747,ENSDART00000158815,ENSDART00000162102,ENSDART00000166322
ENSDARG00000051857		23.9747		28.3147	726	25.4537	546	34.1432	682		18.0718	390	19.5439	375	18.3211	347		29.3039	18.6456	1.55989	0.641444	0.00193067	0.173902	25	18475032	18496410	1	tes	testis derived transcript (3 LIM domains) [Source:ZFIN;Acc:ZDB-GENE-040718-59]	protein_coding	ENSDART00000073564,ENSDART00000152103
ENSDARG00000094792		50.8736		45.0346	1155	34.9552	750	32.7925	655		75.7811	1637	56.6538	1088	60.0245	1138		37.5941	64.1532	-1.70721	-0.771642	0.00194833	0.173902	6	41463785	41501766	1	twf2a	twinfilin actin binding protein 2 [Source:NCBI gene;Acc:100310784]	protein_coding	ENSDART00000065006,ENSDART00000132172
ENSDARG00000020979		10.4614		16.0378	411	12.8782	276	12.8318	256		4.83611	104	8.24955	158	7.93473	150		13.916	7.0068	2.06378	1.04529	0.00195063	0.173902	6	51676227	51763503	1	ripor3	RIPOR family member 3 [Source:NCBI gene;Acc:503535]	protein_coding	ENSDART00000146281,ENSDART00000151565
ENSDARG00000003998		0.980783		1.5005	38	1.28084	27	1.57584	31		0.532203	11	0.494452	9	0.500863	9		1.45239	0.509173	2.84035	1.50607	0.00195126	0.173902	17	20963477	20979077	-1	phyhipla	phytanoyl-CoA 2-hydroxylase interacting protein-like a [Source:ZFIN;Acc:ZDB-GENE-061215-64]	protein_coding	ENSDART00000006676,ENSDART00000126075
ENSDARG00000061977		42.5816		38.2141	980	33.7908	725	29.3907	587		46.857	1012	52.9064	1016	54.3305	1030		33.7985	51.3646	-1.52317	-0.60708	0.001958	0.173902	18	29145681	29193708	1	ppfibp2a	PPFIA binding protein 2a [Source:ZFIN;Acc:ZDB-GENE-070705-277]	protein_coding	ENSDART00000089031,ENSDART00000135633,ENSDART00000137587,ENSDART00000144423,ENSDART00000147361,ENSDART00000193336
ENSDARG00000026990		4.95386		5.74868	147	6.40418	137	7.47899	149		3.17008	68	2.94069	56	3.98054	75		6.54395	3.36377	1.9389	0.955241	0.0019737	0.173902	2	36646451	36659156	1	klhl6	kelch-like family member 6 [Source:ZFIN;Acc:ZDB-GENE-030616-325]	protein_coding	ENSDART00000039174,ENSDART00000122748
ENSDARG00000053129		12.2336		15.6091	400	14.8344	318	14.4827	289		7.93677	171	9.91507	190	10.6236	201		14.9754	9.49181	1.59972	0.67782	0.00197934	0.173902	3	27798094	27831815	1	carhsp1	calcium regulated heat stable protein 1 [Source:ZFIN;Acc:ZDB-GENE-040426-1479]	protein_coding	ENSDART00000075100,ENSDART00000151437
ENSDARG00000008494		91.9319		119.202	3058	115.392	2477	117.388	2346		48.3842	1045	71.8517	1380	79.3736	1505		117.327	66.5365	1.80202	0.849614	0.00201964	0.176037	6	39874177	39893526	-1	myl6	myosin, light chain 6, alkali, smooth muscle and non-muscle [Source:ZFIN;Acc:ZDB-GENE-041010-28]	protein_coding	ENSDART00000077662,ENSDART00000130613,ENSDART00000135631,ENSDART00000137333,ENSDART00000138100,ENSDART00000141611
ENSDARG00000099137		166.722		196.644	5045	213.9	4592	204.434	4086		151.771	3279	104.017	1998	129.565	2457		204.993	128.451	1.61416	0.690786	0.00202542	0.176037	18	49001425	49116382	-1		latent-transforming growth factor beta-binding protein 4 [Source:NCBI gene;Acc:100333499]	protein_coding	ENSDART00000160702,ENSDART00000174103,ENSDART00000174157,ENSDART00000174394
ENSDARG00000078725		29.8505		39.0326	1001	33.8839	727	39.446	788		27.9754	604	19.2316	369	19.5337	370		37.4542	22.2469	1.69986	0.765413	0.0020665	0.178647	6	35099897	35106425	-1	nos1apa	nitric oxide synthase 1 (neuronal) adaptor protein a [Source:ZFIN;Acc:ZDB-GENE-081024-1]	protein_coding	ENSDART00000165139
ENSDARG00000076348		222.672		184.991	4746	163.691	3514	180.271	3603		294.308	6359	285.039	5476	227.735	4319		176.318	269.027	-1.51817	-0.602335	0.00207903	0.178775	7	41821311	41858513	-1	mylk3	myosin light chain kinase 3 [Source:NCBI gene;Acc:561635]	protein_coding	ENSDART00000109918,ENSDART00000142981
ENSDARG00000086685		107.264		93.7133	2404	90.3339	1939	80.8181	1615		115.627	2498	133.632	2567	129.46	2455		88.2884	126.24	-1.43012	-0.51614	0.00212312	0.180711	9	23900703	23902215	1	trim63b	tripartite motif containing 63b [Source:ZFIN;Acc:ZDB-GENE-040426-1003]	protein_coding	ENSDART00000127859
ENSDARG00000104733		13.3383		9.91891	254	9.8508	211	12.2315	244		16.1281	348	16.0046	307	15.8958	301		10.6671	16.0095	-1.51592	-0.600194	0.00212874	0.180711	5	54416258	54424049	-1	coq4	coenzyme Q4 homolog (S. cerevisiae) [Source:NCBI gene;Acc:100137123]	protein_coding	ENSDART00000164067,ENSDART00000164595,ENSDART00000169270
ENSDARG00000045199		27.9195		31.1988	800	35.421	760	31.2417	624		22.8847	494	23.9159	459	22.8552	433		32.6205	23.2186	1.40276	0.488272	0.00213509	0.180711	7	6684123	6754012	-1	zgc:55262	zgc:55262 [Source:ZFIN;Acc:ZDB-GENE-040426-2814]	protein_coding	ENSDART00000113658
ENSDARG00000061603		123.259		97.6886	2506	112.504	2415	85.7707	1714		141.034	3047	143.625	2759	158.932	3014		98.6545	147.864	-1.50603	-0.590753	0.00215508	0.181453	14	29807097	29906209	-1	sorbs2b	sorbin and SH3 domain containing 2b [Source:ZFIN;Acc:ZDB-GENE-070308-3]	protein_coding	ENSDART00000088004,ENSDART00000136380,ENSDART00000138413,ENSDART00000141034,ENSDART00000142605,ENSDART00000172349,ENSDART00000181466,ENSDART00000186445,ENSDART00000192952,ENSDART00000193537
ENSDARG00000092610		42.6076		37.4346	960	34.9086	749	33.2928	665		51.9014	1121	45.3595	871	52.7488	1000		35.212	50.0032	-1.41787	-0.503726	0.00221663	0.185669	9	34380299	34389875	1	lamp1b	lysosomal associated membrane protein 1b [Source:ZFIN;Acc:ZDB-GENE-030131-9303]	protein_coding	ENSDART00000131705
ENSDARG00000028731		72.5937		57.7402	1481	62.4815	1341	41.0469	820		100.494	2171	83.3543	1601	90.4454	1715		53.7562	91.4312	-1.72271	-0.784676	0.002249	0.187409	9	41156287	41208343	1	stat4	signal transducer and activator of transcription 4 [Source:ZFIN;Acc:ZDB-GENE-030616-264]	protein_coding	ENSDART00000105764,ENSDART00000147052,ENSDART00000186270,ENSDART00000189195
ENSDARG00000088805		12.9829		18.6491	478	13.5769	291	18.835	376		10.7135	231	8.92617	171	7.19661	136		17.0203	8.94542	1.89724	0.923899	0.00227095	0.188267	16	29043813	29057849	1	nes	nestin [Source:NCBI gene;Acc:100150939]	protein_coding	ENSDART00000122681
ENSDARG00000027063		199.949		215.04	5517	229.037	4917	284.577	5688		172.226	3721	151.901	2918	146.911	2786		242.884	157.013	1.5396	0.622552	0.00229229	0.189067	3	40809011	40820612	1	arpc1b	actin related protein 2/3 complex, subunit 1B [Source:ZFIN;Acc:ZDB-GENE-030131-7414]	protein_coding	ENSDART00000033713,ENSDART00000190803
ENSDARG00000012801		208.767		189.512	4862	165.647	3556	141.851	2835		230.166	4973	264.948	5090	260.475	4940		165.67	251.863	-1.52821	-0.61184	0.00230614	0.189067	2	48119494	48171441	-1	pfkpb	phosphofructokinase, platelet b [Source:ZFIN;Acc:ZDB-GENE-070912-634]	protein_coding	ENSDART00000123040,ENSDART00000137733,ENSDART00000141152,ENSDART00000146553,ENSDART00000156258
ENSDARG00000098293		15.975		20.403	523	16.3248	350	27.7398	554		9.18629	198	12.2052	234	9.9909	189		21.4892	10.4608	2.0211	1.01514	0.00231773	0.189067	14	14560932	14566417	-1	si:dkey-27i16.2	si:dkey-27i16.2 [Source:ZFIN;Acc:ZDB-GENE-030131-9667]	protein_coding	ENSDART00000159056
ENSDARG00000043403		36.4709		39.851	1022	45.9937	987	51.4524	1028		24.3657	526	23.4995	451	33.6633	638		45.7657	27.1761	1.69919	0.764849	0.00232796	0.189067	8	15239549	15250265	1	paox1	polyamine oxidase (exo-N4-amino) 1 [Source:ZFIN;Acc:ZDB-GENE-081104-436]	protein_coding	ENSDART00000132216,ENSDART00000142472
ENSDARG00000071562		153.611		131.986	3386	116.836	2508	120.039	2399		208.971	4515	160.177	3077	183.659	3483		122.953	184.269	-1.49198	-0.577228	0.00233907	0.189067	14	30285613	30357641	1	mtus1a	microtubule associated tumor suppressor 1a [Source:NCBI gene;Acc:563853]	protein_coding	ENSDART00000105889,ENSDART00000148448,ENSDART00000149765,ENSDART00000173004,ENSDART00000173090
ENSDARG00000115041		4.43107		6.37227	163	7.3357	157	4.67749	93		2.7073	58	3.25298	62	2.2407	42		6.12849	2.73366	2.24344	1.16571	0.00235992	0.189804	3	4555758	4557653	-1	ftr50	finTRIM family, member 50 [Source:ZFIN;Acc:ZDB-GENE-080215-17]	protein_coding	ENSDART00000111305
ENSDARG00000034270		630.315		563.351	14454	534.901	11484	472.327	9441		770.052	16639	712.818	13695	728.44	13816		523.526	737.103	-1.41117	-0.496892	0.00238234	0.190181	8	45762484	45838481	-1	ogdha	oxoglutarate (alpha-ketoglutarate) dehydrogenase a (lipoamide) [Source:ZFIN;Acc:ZDB-GENE-030131-2143]	protein_coding	ENSDART00000022242,ENSDART00000046064,ENSDART00000132965,ENSDART00000148206,ENSDART00000170485
ENSDARG00000041068		582.295		485.13	12447	477.752	10257	469.976	9394		702.347	15176	604.871	11621	753.694	14295		477.619	686.971	-1.43251	-0.51855	0.00238961	0.190181	18	21178721	21188768	-1	got2a	glutamic-oxaloacetic transaminase 2a, mitochondrial [Source:ZFIN;Acc:ZDB-GENE-040426-2703]	protein_coding	ENSDART00000060166
ENSDARG00000014215		135.609		96.6753	2480	103.142	2214	123.791	2474		179.26	3873	163.508	3141	147.28	2793		107.87	163.349	-1.51761	-0.601802	0.00240176	0.190181	18	13792490	14134035	1	cdh13	cadherin 13, H-cadherin (heart) [Source:ZFIN;Acc:ZDB-GENE-060503-286]	protein_coding	ENSDART00000136754,ENSDART00000169552
ENSDARG00000078989		73.6964		68.0683	1746	54.4239	1168	54.1539	1082		94.1074	2033	91.6819	1761	79.7427	1512		58.882	88.5107	-1.50797	-0.592609	0.00243025	0.190181	18	26719787	26755230	1	alpk3a	alpha-kinase 3a [Source:ZFIN;Acc:ZDB-GENE-050419-48]	protein_coding	ENSDART00000110843,ENSDART00000141672,ENSDART00000145212
ENSDARG00000019128		68.0571		85.9574	2205	86.7941	1863	78.4168	1567		42.2292	912	52.0736	1000	62.8715	1192		83.7228	52.3914	1.61783	0.694064	0.0024422	0.190181	2	55300425	55337585	-1	tpm4b	tropomyosin 4b [Source:ZFIN;Acc:ZDB-GENE-030131-2964]	protein_coding	ENSDART00000097874,ENSDART00000163859,ENSDART00000169382,ENSDART00000177924
ENSDARG00000005578		65.8764		60.3124	1547	51.0704	1096	41.8473	836		79.252	1712	75.5471	1451	87.2293	1654		51.0767	80.6761	-1.59378	-0.672451	0.00244576	0.190181	1	50997156	51015627	1	ugp2a	UDP-glucose pyrophosphorylase 2a [Source:ZFIN;Acc:ZDB-GENE-090311-46]	protein_coding	ENSDART00000010449
ENSDARG00000035322		572.28		487.43	12506	449.108	9642	379.978	7595		726.735	15703	591.079	11356	799.351	15161		438.838	705.722	-1.60449	-0.682116	0.00245111	0.190181	23	18722715	18757078	1	myh7bb	myosin, heavy chain 7B, cardiac muscle, beta b [Source:ZFIN;Acc:ZDB-GENE-090311-5]	protein_coding	ENSDART00000025057,ENSDART00000137438
ENSDARG00000100693		26.1074		28.1978	723	32.1141	689	33.9431	678		18.6271	402	20.1164	386	23.646	448		31.4183	20.7965	1.51469	0.599027	0.00246967	0.190181	6	34960025	35032792	-1	ddr2a	discoidin domain receptor tyrosine kinase 2a [Source:ZFIN;Acc:ZDB-GENE-090316-2]	protein_coding	ENSDART00000168256
ENSDARG00000036628		248.182		266.408	6835	346.781	7445	329.801	6592		141.774	3063	190.885	3667	213.447	4048		314.33	182.035	1.74105	0.799955	0.00247816	0.190181	21	33459524	33463894	1	cd74b	CD74 molecule, major histocompatibility complex, class II invariant chain b [Source:ZFIN;Acc:ZDB-GENE-990910-10]	protein_coding	ENSDART00000053205
ENSDARG00000103317		8.53347		9.72404	249	11.481	246	11.4811	229		4.83611	104	6.32379	121	7.35478	139		10.8954	6.17156	1.79085	0.840647	0.00248226	0.190181	18	3475688	3527988	-1	capn5a	calpain 5a [Source:ZFIN;Acc:ZDB-GENE-061103-214]	protein_coding	ENSDART00000157669,ENSDART00000169049,ENSDART00000181412
ENSDARG00000061794		210.573		184.328	4729	166.113	3566	179.771	3593		254.139	5491	252.405	4849	226.68	4299		176.737	244.408	-1.38236	-0.467131	0.00252034	0.190221	21	24984970	25046991	1	jam3b	junctional adhesion molecule 3b [Source:ZFIN;Acc:ZDB-GENE-030131-441]	protein_coding	ENSDART00000088546
ENSDARG00000070155		81.0493		99.0137	2540	87.1667	1871	105.631	2111		56.1128	1212	71.071	1365	67.3002	1276		97.2706	64.828	1.50326	0.588094	0.00252634	0.190221	9	7662638	7673856	-1	tuba8l3	tubulin, alpha 8 like 3 [Source:ZFIN;Acc:ZDB-GENE-040801-77]	protein_coding	ENSDART00000102715
ENSDARG00000112168		3.3975		3.83895	98	4.86718	104	5.17776	103		1.73545	37	2.47226	47	2.29343	43		4.62796	2.16704	2.13448	1.09388	0.00253442	0.190221	KN150019.2	4903	10929	1			protein_coding	ENSDART00000183122
ENSDARG00000002917		71.9554		58.5586	1502	65.3227	1402	47.8505	956		92.4414	1997	84.8116	1629	82.7479	1569		57.2439	86.667	-1.52454	-0.608371	0.00253475	0.190221	22	10098446	10110988	-1	gls2b	glutaminase 2b (liver, mitochondrial) [Source:ZFIN;Acc:ZDB-GENE-050208-408]	protein_coding	ENSDART00000031005,ENSDART00000147580
ENSDARG00000043457		5528.79		5059.64	129820	4468.09	95931	4335.09	86655		6382.72	137919	6680.7	128357	6246.53	118479		4620.94	6436.65	-1.39567	-0.480954	0.00256937	0.190221	16	17189839	17200120	-1	gapdh	glyceraldehyde-3-phosphate dehydrogenase [Source:NCBI gene;Acc:317743]	protein_coding	ENSDART00000063800,ENSDART00000135146,ENSDART00000139939,ENSDART00000147739,ENSDART00000148397,ENSDART00000163606
ENSDARG00000021633		30.8613		24.2224	621	25.5934	549	23.5876	471		40.5169	875	31.0464	596	40.2009	762		24.4678	37.2547	-1.51263	-0.597057	0.00257028	0.190221	15	5923851	5958803	1	sh3bgr	SH3 domain binding glutamate-rich protein [Source:ZFIN;Acc:ZDB-GENE-040801-27]	protein_coding	ENSDART00000121529,ENSDART00000145827,ENSDART00000152520
ENSDARG00000077002		13.4173		18.2204	467	17.0701	366	13.9324	278		10.1119	218	10.0712	193	11.0981	210		16.4076	10.4271	1.57387	0.654317	0.00259541	0.190221	9	20076556	20372977	-1	igsf3	immunoglobulin superfamily, member 3 [Source:ZFIN;Acc:ZDB-GENE-070912-243]	protein_coding	ENSDART00000113418
ENSDARG00000076320		11.7099		12.2574	314	18.7468	402	15.9335	318		8.58467	185	6.0115	115	8.72556	165		15.6459	7.77391	1.99169	0.993991	0.00259773	0.190221	25	35155618	35182347	-1	ano9a	anoctamin 9a [Source:ZFIN;Acc:ZDB-GENE-071004-46]	protein_coding	ENSDART00000115210,ENSDART00000193240
ENSDARG00000100352		17.5117		14.0112	359	7.84803	168	11.331	226		23.3938	505	29.9014	574	18.5847	352		11.0634	23.9599	-2.16583	-1.11492	0.00260792	0.190221	24	29783638	29868151	-1	aglb	amylo-alpha-1, 6-glucosidase, 4-alpha-glucanotransferase b [Source:ZFIN;Acc:ZDB-GENE-050309-54]	protein_coding	ENSDART00000160929,ENSDART00000184802
ENSDARG00000030012		216.409		181.054	4645	182.414	3916	179.971	3597		255.944	5530	227.838	4377	271.231	5144		181.147	251.671	-1.38572	-0.47064	0.00261862	0.190221	9	24065855	24115589	1	lrrfip1a	leucine rich repeat (in FLII) interacting protein 1a [Source:ZFIN;Acc:ZDB-GENE-030131-99]	protein_coding	ENSDART00000011344,ENSDART00000023196,ENSDART00000039295,ENSDART00000079689,ENSDART00000101577,ENSDART00000126198,ENSDART00000150443,ENSDART00000159324,ENSDART00000161468,ENSDART00000166303,ENSDART00000171577,ENSDART00000172743
ENSDARG00000015869		5.41286		3.64408	93	4.35484	93	3.3768	67		6.31702	136	6.42788	123	8.35651	158		3.79191	7.0338	-1.84295	-0.88202	0.00262535	0.190221	20	31287356	31305503	1	slc22a16	solute carrier family 22 member 16 [Source:ZFIN;Acc:ZDB-GENE-041001-166]	protein_coding	ENSDART00000007688
ENSDARG00000093089		1.64917		3.13742	80	2.58496	55	1.72592	34		0.717318	15	0.806738	15	0.922643	17		2.48277	0.815566	3.03932	1.60375	0.00263112	0.190221	23	28139489	28141419	-1	tac3a	tachykinin precursor 3a [Source:ZFIN;Acc:ZDB-GENE-090313-253]	protein_coding	ENSDART00000133039
ENSDARG00000104451		30.28		32.6408	837	37.8895	813	39.296	785		27.0961	585	20.6369	396	24.1205	457		36.6087	23.9512	1.52956	0.613112	0.00263574	0.190221	19	18903533	18915937	1	slc39a7	solute carrier family 39 member 7 [Source:NCBI gene;Acc:30094]	protein_coding	ENSDART00000157523,ENSDART00000166562
ENSDARG00000062479		159.837		143.561	3683	125.359	2691	121.49	2428		168.014	3630	198.119	3806	202.481	3840		130.137	189.538	-1.45556	-0.541576	0.00266688	0.191329	22	16169447	16180849	-1	vcam1b	vascular cell adhesion molecule 1b [Source:ZFIN;Acc:ZDB-GENE-070209-238]	protein_coding	ENSDART00000090390,ENSDART00000171331,ENSDART00000185607
ENSDARG00000076594		18.8372		13.7774	353	17.0701	366	9.58011	191		26.0317	562	23.6036	453	22.9606	435		13.4758	24.1986	-1.83445	-0.875346	0.00267477	0.191329	14	16308840	16328331	-1	pcdh12	protocadherin 12 [Source:ZFIN;Acc:ZDB-GENE-140106-126]	protein_coding	ENSDART00000111262
ENSDARG00000077231		609.638		858.58	22029	813.238	17460	641.117	12815		551.34	11913	372.167	7150	421.384	7992		770.978	448.297	1.73004	0.790805	0.00269272	0.19137	18	7150144	7228004	1	vwf	von Willebrand factor [Source:ZFIN;Acc:ZDB-GENE-070103-1]	protein_coding	ENSDART00000114690,ENSDART00000134872,ENSDART00000142484,ENSDART00000142905,ENSDART00000143345
ENSDARG00000067829		15.7685		14.1281	362	6.21788	133	9.53008	190		24.0417	519	21.0012	403	19.6918	373		9.95869	21.5783	-2.24809	-1.1687	0.00269902	0.19137	7	70578985	70665965	-1	ppargc1a	peroxisome proliferator-activated receptor gamma, coactivator 1 alpha [Source:ZFIN;Acc:ZDB-GENE-080505-1]	protein_coding	ENSDART00000097710
ENSDARG00000019930		29.7132		47.6459	1222	34.4894	740	33.3428	666		17.0074	367	26.1019	501	19.6918	373		38.4927	20.9337	1.85111	0.888391	0.00272516	0.192379	22	16535575	16545330	1	tal1	T-cell acute lymphocytic leukemia 1 [Source:NCBI gene;Acc:30766]	protein_coding	ENSDART00000083063
ENSDARG00000000002		102.465		118.968	3052	117.581	2524	136.348	2725		68.5617	1481	95.2732	1830	78.0556	1480		124.299	80.6301	1.55234	0.634446	0.0027489	0.192746	9	34089156	34113209	1	ccdc80	coiled-coil domain containing 80 [Source:NCBI gene;Acc:368419]	protein_coding	ENSDART00000000005
ENSDARG00000041607		84.5741		68.0683	1746	45.7608	982	57.0554	1140		147.42	3185	99.8013	1917	89.3382	1694		56.9615	112.187	-1.94791	-0.96193	0.0027638	0.192746	14	6972868	6987649	-1	eif4ebp3l	eukaryotic translation initiation factor 4E binding protein 3, like [Source:NCBI gene;Acc:324490]	protein_coding	ENSDART00000060990,ENSDART00000157637
ENSDARG00000099600		16.6118		22.3517	573	18.6536	400	23.3875	467		8.307	179	13.9748	268	12.9961	246		21.4643	11.7593	1.879	0.909968	0.00276612	0.192746	11	45174520	45185792	-1	si:dkey-93h22.7	si:dkey-93h22.7 [Source:ZFIN;Acc:ZDB-GENE-141216-252]	protein_coding	ENSDART00000171328
ENSDARG00000029596		23.2482		18.3763	471	20.2372	434	17.2342	344		24.1805	522	29.2247	561	30.2363	573		18.6159	27.8805	-1.49096	-0.576241	0.00279171	0.193695	2	42114310	42128714	-1	trim55a	tripartite motif containing 55a [Source:ZFIN;Acc:ZDB-GENE-040718-50]	protein_coding	ENSDART00000047055
ENSDARG00000099390		4.41734		3.761	96	2.39866	51	2.37627	47		5.66912	122	7.0004	134	5.29861	100		2.84531	5.98938	-2.10135	-1.07131	0.00281125	0.194187	20	1903481	1979652	1	lama2	laminin, alpha 2 [Source:ZFIN;Acc:ZDB-GENE-060119-1]	protein_coding	ENSDART00000164896
ENSDARG00000014588		56.8341		77.6949	1993	64.624	1387	65.71	1313		46.7182	1009	36.3032	697	49.9545	947		69.343	44.3253	1.57298	0.653497	0.00285051	0.194187	19	27608927	27777228	-1	adcy2b	adenylate cyclase 2b (brain) [Source:ZFIN;Acc:ZDB-GENE-060503-69]	protein_coding	ENSDART00000046166,ENSDART00000135348
ENSDARG00000095767		2.86387		4.89125	125	4.16854	89	3.72699	74		0.671039	14	1.37926	26	2.34615	44		4.26226	1.46548	3.37036	1.7529	0.00285286	0.194187	20	53802521	53810638	1		iodothyronine deiodinase 3b [Source:NCBI gene;Acc:798872]	processed_transcript	ENSDART00000131982
ENSDARG00000055120		317.434		353.047	9058	362.523	7783	392.784	7851		291.208	6292	251.104	4824	253.938	4816		369.452	265.416	1.39398	0.479207	0.00286012	0.194187	17	32622931	32631514	1	ctsba	cathepsin Ba [Source:ZFIN;Acc:ZDB-GENE-040426-2650]	protein_coding	ENSDART00000077418,ENSDART00000135339,ENSDART00000136459,ENSDART00000137270,ENSDART00000137617,ENSDART00000138373,ENSDART00000142449,ENSDART00000144217,ENSDART00000147144,ENSDART00000152067
ENSDARG00000043182		71.9263		64.015	1642	59.4541	1276	48.9011	977		95.9123	2072	81.7928	1571	81.4825	1545		57.4567	86.3959	-1.50861	-0.593221	0.00287206	0.194187	10	35417099	35437624	1	hhla2a.1	HERV-H LTR-associating 2a, tandem duplicate 1 [Source:ZFIN;Acc:ZDB-GENE-050327-45]	protein_coding	ENSDART00000063398,ENSDART00000147303
ENSDARG00000079542		32.0422		26.8727	689	25.9195	556	23.3875	467		45.4224	981	36.3553	698	34.296	650		25.3932	38.6912	-1.51404	-0.598407	0.00288003	0.194187	10	34315719	34404768	1	stard13a	StAR-related lipid transfer (START) domain containing 13a [Source:ZFIN;Acc:ZDB-GENE-091116-18]	protein_coding	ENSDART00000110121,ENSDART00000135303,ENSDART00000189441,ENSDART00000190523
ENSDARG00000077777		1976.62		2144.57	55025	2395.19	51425	2529.07	50554		1383.84	29902	1655.3	31803	1751.73	33225		2356.28	1596.96	1.47938	0.564988	0.00288573	0.194187	9	54178475	54180059	1	tmsb4x	thymosin beta 4 X-linked [Source:ZFIN;Acc:ZDB-GENE-030131-8304]	protein_coding	ENSDART00000104475,ENSDART00000189829
ENSDARG00000086327		12.6509		9.84096	252	7.61516	163	7.67909	153		13.9993	302	14.4432	277	22.328	423		8.3784	16.9235	-1.96243	-0.972644	0.00290732	0.194187	5	15667874	15817204	1	srrm4	serine/arginine repetitive matrix 4 [Source:NCBI gene;Acc:796574]	protein_coding	ENSDART00000127015,ENSDART00000145273
ENSDARG00000091411		13.0993		22.0399	565	12.459	267	18.8851	377		9.18629	198	8.3016	159	7.72384	146		17.7947	8.40391	2.06902	1.04895	0.00291762	0.194187	9	9411009	9419704	-1	si:ch211-214p13.9	si:ch211-214p13.9 [Source:ZFIN;Acc:ZDB-GENE-060503-213]	protein_coding	ENSDART00000138996,ENSDART00000146210
ENSDARG00000012405		1555.93		1667.06	42773	2141.77	45984	1854.51	37070		1058.65	22875	1237.93	23784	1375.66	26092		1887.78	1224.08	1.54289	0.625636	0.00295384	0.194187	3	23221047	23239458	1	col1a1a	collagen, type I, alpha 1a [Source:ZFIN;Acc:ZDB-GENE-030131-9102]	protein_coding	ENSDART00000009393,ENSDART00000140586
ENSDARG00000011876		63.8028		49.8674	1279	54.4239	1168	57.1054	1141		77.4009	1672	74.6103	1433	69.4091	1316		53.7989	73.8068	-1.37271	-0.457029	0.00296915	0.194187	1	36612660	36702355	1	ednraa	endothelin receptor type Aa [Source:ZFIN;Acc:ZDB-GENE-010906-2]	protein_coding	ENSDART00000010632,ENSDART00000125013,ENSDART00000128557,ENSDART00000186772,ENSDART00000187475,ENSDART00000190784,ENSDART00000192274
ENSDARG00000103211		32.2816		37.0839	951	39.147	840	50.652	1012		16.6834	360	29.6932	570	20.4299	387		42.2943	22.2688	1.94252	0.957932	0.00301737	0.194187	7	20600674	20611039	-1	si:dkey-19b23.8	si:dkey-19b23.8 [Source:ZFIN;Acc:ZDB-GENE-030131-4634]	protein_coding	ENSDART00000170422
ENSDARG00000052522		26.6782		33.6152	862	31.8346	683	30.6914	613		17.7478	383	24.7486	475	21.4317	406		32.047	21.3094	1.52138	0.60538	0.0030182	0.194187	12	20605191	20616160	-1	snx11	sorting nexin 11 [Source:ZFIN;Acc:ZDB-GENE-041111-253]	protein_coding	ENSDART00000105362
ENSDARG00000039041		41.7303		31.5495	809	37.0045	794	25.5886	511		49.5412	1070	45.6718	877	61.0262	1157		31.3809	52.0797	-1.66396	-0.734624	0.00302095	0.194187	13	39911551	39947335	-1	sfrp5	secreted frizzled-related protein 5 [Source:ZFIN;Acc:ZDB-GENE-011108-2]	protein_coding	ENSDART00000056996
ENSDARG00000071361		26.28		35.369	907	30.9031	663	33.2928	665		13.9067	300	22.3024	428	21.9062	415		33.1883	19.3718	1.75969	0.815321	0.00302098	0.194187	22	17455711	17459587	-1	si:ch211-197g15.10	si:ch211-197g15.10 [Source:ZFIN;Acc:ZDB-GENE-050208-617]	protein_coding	ENSDART00000139658,ENSDART00000142267
ENSDARG00000058818		7.38724		9.1784	235	8.12749	174	11.6812	233		4.32705	93	4.8144	92	6.19489	117		9.66237	5.11211	1.89118	0.919288	0.00302867	0.194187	23	6586467	6632106	1	rbm38	RNA binding motif protein 38 [Source:ZFIN;Acc:ZDB-GENE-030131-5923]	protein_coding	ENSDART00000081763,ENSDART00000121480
ENSDARG00000104587		276.193		245.44	6297	230.388	4946	196.18	3921		328.138	7090	297.895	5723	359.119	6811		224.002	328.384	-1.46836	-0.554207	0.00303988	0.194187	3	12128117	12187245	-1	srl	sarcalumenin [Source:ZFIN;Acc:ZDB-GENE-061110-91]	protein_coding	ENSDART00000165131,ENSDART00000189553
ENSDARG00000092060		16.0486		12.6081	323	14.2755	306	8.6296	172		21.4964	464	20.0644	385	19.2173	364		11.8377	20.2594	-1.73664	-0.796296	0.00307298	0.194187	5	23151169	23161715	1	tbx5b	T-box transcription factor 5b [Source:ZFIN;Acc:ZDB-GENE-060601-2]	protein_coding	ENSDART00000125638,ENSDART00000166783
ENSDARG00000098408		11.7811		10.8933	279	7.28912	156	5.67803	113		14.0455	303	17.2538	331	15.5268	294		7.95347	15.6087	-1.98282	-0.987552	0.00308292	0.194187	21	5589923	5603828	1	stbd1	starch binding domain 1 [Source:ZFIN;Acc:ZDB-GENE-120817-2]	protein_coding	ENSDART00000160885
ENSDARG00000097243		15.1589		9.13943	234	13.1577	282	8.6296	172		25.3375	547	16.421	315	18.2683	346		10.3089	20.009	-1.95301	-0.965698	0.00308403	0.194187	15	24592325	24618905	-1		uncharacterized LOC110437905 [Source:NCBI gene;Acc:110437905]	antisense	ENSDART00000156270,ENSDART00000156733
ENSDARG00000076787		21.7322		19.4286	498	17.7687	381	14.6828	293		25.4763	550	28.6002	549	24.4369	463		17.2934	26.1711	-1.51288	-0.597302	0.00308884	0.194187	6	51932267	52030817	1	angpt4	angiopoietin 4 [Source:ZFIN;Acc:ZDB-GENE-110104-1]	protein_coding	ENSDART00000156256,ENSDART00000181778
ENSDARG00000076317		46.843		52.4786	1346	51.7225	1110	58.4061	1167		36.9534	798	41.56	798	39.9373	757		54.2024	39.4836	1.37264	0.456957	0.0030939	0.194187	23	44843860	44879214	-1	plod3	procollagen-lysine, 2-oxoglutarate 5-dioxygenase 3 [Source:ZFIN;Acc:ZDB-GENE-021031-4]	protein_coding	ENSDART00000085764,ENSDART00000136839,ENSDART00000138037,ENSDART00000149181,ENSDART00000149883
ENSDARG00000103181		46.1479		60.1565	1543	48.4622	1040	55.2044	1103		34.7783	751	41.1957	791	37.0902	703		54.6077	37.6881	1.44733	0.533397	0.00311497	0.194187	16	35343493	35379565	1	si:dkey-34d22.1	si:dkey-34d22.1 [Source:ZFIN;Acc:ZDB-GENE-131121-338]	protein_coding	ENSDART00000167140,ENSDART00000171269
ENSDARG00000093563		6.85098		8.04816	206	8.54667	183	8.77968	175		4.46588	96	5.38693	103	5.87855	111		8.45817	5.24379	1.62621	0.70151	0.00312584	0.194187	5	20886282	20921677	-1	si:ch211-225b11.4	si:ch211-225b11.4 [Source:ZFIN;Acc:ZDB-GENE-060526-114]	protein_coding	ENSDART00000137603,ENSDART00000158030
ENSDARG00000032765		61.7138		76.7985	1970	85.6763	1839	80.0677	1600		59.5836	1287	37.6565	723	30.4999	578		80.8475	42.58	1.97192	0.979601	0.00313275	0.194187	4	11573568	11603149	-1	net1	neuroepithelial cell transforming 1 [Source:ZFIN;Acc:ZDB-GENE-041121-18]	protein_coding	ENSDART00000002682,ENSDART00000049066,ENSDART00000144452,ENSDART00000150468,ENSDART00000150705
ENSDARG00000104654		1.48021		1.6564	42	3.88909	83	2.07611	41		0.208254	4	0.234214	4	0.817198	15		2.54053	0.419889	6.94236	2.79543	0.00316372	0.194187	7	51752239	51757085	-1	leap2	liver-expressed antimicrobial peptide 2 [Source:ZFIN;Acc:ZDB-GENE-081022-131]	protein_coding	ENSDART00000167747
ENSDARG00000011851		14.1413		10.4256	267	12.5988	270	10.3305	206		16.2669	351	15.6924	301	19.5337	370		11.1183	17.1643	-1.5431	-0.625829	0.00318273	0.194187	7	33970698	34062301	-1	map2k5	mitogen-activated protein kinase kinase 5 [Source:ZFIN;Acc:ZDB-GENE-030131-1517]	protein_coding	ENSDART00000052404
ENSDARG00000030107		7.52179		4.65741	119	3.60963	77	5.628	112		10.297	222	7.52088	144	13.4179	254		4.63168	10.4119	-2.2278	-1.15562	0.00319742	0.194187	20	21638397	21806170	-1	si:ch211-207i1.2	si:ch211-207i1.2 [Source:ZFIN;Acc:ZDB-GENE-041014-149]	protein_coding	ENSDART00000133286,ENSDART00000145807,ENSDART00000152145,ENSDART00000152768
ENSDARG00000057128		357.762		307.291	7884	286.838	6158	295.433	5905		441.521	9540	367.534	7061	447.956	8496		296.52	419.004	-1.40805	-0.493694	0.00320456	0.194187	20	47953047	47984895	1	hadhaa	hydroxyacyl-CoA dehydrogenase trifunctional multienzyme complex subunit alpha a [Source:ZFIN;Acc:ZDB-GENE-031222-5]	protein_coding	ENSDART00000079734
ENSDARG00000099461		22.9688		15.9209	408	20.703	444	15.8835	317		27.8366	601	24.2802	466	33.1888	629		17.5025	28.4352	-1.62559	-0.700965	0.0032273	0.194187	24	34085940	34107618	1	asb10	ankyrin repeat and SOCS box containing 10 [Source:ZFIN;Acc:ZDB-GENE-060929-1106]	protein_coding	ENSDART00000157466,ENSDART00000171189
ENSDARG00000039399		215.393		187.992	4823	183.998	3950	146.103	2920		280.888	6069	260.368	5002	233.007	4419		172.698	258.088	-1.49958	-0.584559	0.00323152	0.194187	13	28634862	28674422	-1	nt5c2a	5'-nucleotidase, cytosolic IIa [Source:ZFIN;Acc:ZDB-GENE-030131-3566]	protein_coding	ENSDART00000057574,ENSDART00000122754,ENSDART00000164508
ENSDARG00000042670		28.7621		24.3004	623	24.3825	523	22.6871	453		34.8246	752	36.5635	702	29.8145	565		23.79	33.7342	-1.413	-0.49876	0.00326077	0.194187	22	15912253	15957079	-1	eps15l1a	epidermal growth factor receptor pathway substrate 15-like 1a [Source:ZFIN;Acc:ZDB-GENE-060503-274]	protein_coding	ENSDART00000080047,ENSDART00000149236,ENSDART00000176304,ENSDART00000187500,ENSDART00000190068
ENSDARG00000062089		29.9023		33.1085	849	38.495	826	34.5934	691		21.4964	464	24.4364	469	27.2839	517		35.399	24.4055	1.45635	0.542361	0.00326742	0.194187	9	29430432	29482414	1	uggt2	UDP-glucose glycoprotein glucosyltransferase 2 [Source:ZFIN;Acc:ZDB-GENE-050517-21]	protein_coding	ENSDART00000125632,ENSDART00000132606,ENSDART00000182640,ENSDART00000186095
ENSDARG00000013335		258.888		221.665	5687	156.239	3354	211.138	4220		312.542	6753	281.5	5408	370.243	7022		196.347	321.428	-1.64561	-0.718621	0.00329272	0.194187	14	49251331	49360686	1	anxa6	annexin A6 [Source:ZFIN;Acc:ZDB-GENE-030707-3]	protein_coding	ENSDART00000006073,ENSDART00000105346,ENSDART00000148807,ENSDART00000148882
ENSDARG00000070581		2.68811		9.1784	235	2.77126	59	3.52688	70		0.0231393	0	0.286262	5	0.342696	6		5.15885	0.217366	35.3906	5.14529	0.00330672	0.194187	1	2454094	2457546	-1	ggact.1	gamma-glutamylamine cyclotransferase, tandem duplicate 1 [Source:NCBI gene;Acc:777609]	protein_coding	ENSDART00000103795
ENSDARG00000008278		2.31643		3.41024	87	3.19045	68	2.97659	59		1.55033	33	1.79564	34	0.975365	18		3.19242	1.44045	2.28526	1.19236	0.00332179	0.194187	7	24979833	24995640	-1	rcor2	REST corepressor 2 [Source:NCBI gene;Acc:402934]	protein_coding	ENSDART00000002961,ENSDART00000131671,ENSDART00000173791,ENSDART00000173955,ENSDART00000174002
ENSDARG00000090720		1.25331		1.85127	47	1.70002	36	1.92603	38		0.624761	13	0.442405	8	0.975365	18		1.82577	0.680844	2.82763	1.4996	0.00332614	0.194187	19	47522007	47523793	-1	grem1a	gremlin 1a, DAN family BMP antagonist [Source:ZFIN;Acc:ZDB-GENE-040625-1]	protein_coding	ENSDART00000124234
ENSDARG00000059729		4.4555		5.43689	139	5.985	128	6.47845	129		1.96684	42	3.14888	60	3.71693	70		5.96678	2.94422	2.10682	1.07506	0.00336106	0.194187	5	13427826	13469307	1	sec14l8	SEC14-like lipid binding 8 [Source:ZFIN;Acc:ZDB-GENE-060526-180]	protein_coding	ENSDART00000083359,ENSDART00000144810
ENSDARG00000097553		377.86		288.974	7414	316.832	6802	341.257	6821		450.637	9737	405.685	7794	463.773	8796		315.688	440.032	-1.39455	-0.479799	0.00336848	0.194187	2	12798366	12802906	1		uncharacterized LOC110439470 [Source:NCBI gene;Acc:110439470]	lincRNA	ENSDART00000154321
ENSDARG00000074201		751.226		912.209	23405	839.786	18030	979.847	19586		694.248	15001	594.93	11430	486.338	9224		910.614	591.839	1.55206	0.63418	0.00338557	0.194187	23	19759128	19809027	1	flna	filamin A, alpha (actin binding protein 280) [Source:ZFIN;Acc:ZDB-GENE-030131-2145]	protein_coding	ENSDART00000131809,ENSDART00000135820,ENSDART00000141421,ENSDART00000142228,ENSDART00000144281
ENSDARG00000062023		18.2964		23.1311	593	22.566	484	21.3864	427		14.1844	306	17.2017	330	11.309	214		22.3612	14.2317	1.59361	0.6723	0.00339659	0.194187	24	26753956	26885897	-1	fndc3bb	fibronectin type III domain containing 3Bb [Source:ZFIN;Acc:ZDB-GENE-070510-2]	protein_coding	ENSDART00000087991,ENSDART00000147788,ENSDART00000180512
ENSDARG00000031763		51.6378		68.7698	1764	65.5555	1407	56.8553	1136		48.8933	1056	32.4517	623	37.3011	707		63.7269	39.5487	1.62847	0.703516	0.00342084	0.194187	18	19648275	19699061	1	smad6b	SMAD family member 6b [Source:ZFIN;Acc:ZDB-GENE-050419-198]	protein_coding	ENSDART00000100569
ENSDARG00000020328		202.91		172.558	4427	169.653	3642	131.245	2623		283.942	6135	215.191	4134	244.869	4644		157.818	248.001	-1.57326	-0.653756	0.00344157	0.194187	11	23342996	23501467	-1	plekha6	pleckstrin homology domain containing, family A member 6 [Source:ZFIN;Acc:ZDB-GENE-140106-14]	protein_coding	ENSDART00000032844,ENSDART00000159221,ENSDART00000169066,ENSDART00000183935,ENSDART00000184125,ENSDART00000193284
ENSDARG00000099645		19.1743		25.3916	651	27.7359	595	19.1352	382		14.4158	311	16.0567	308	12.3107	233		24.0876	14.2611	1.68168	0.749906	0.0034439	0.194187	15	2931882	2973368	-1	zgc:153184	zgc:153184 [Source:ZFIN;Acc:ZDB-GENE-060825-136]	protein_coding	ENSDART00000161053,ENSDART00000163131
ENSDARG00000069498		35.8886		29.2111	749	32.2538	692	20.8361	416		41.3499	893	44.9952	864	46.6857	885		27.4337	44.3436	-1.63728	-0.7113	0.00344862	0.194187	21	25676097	25685768	-1	phkg1b	phosphorylase kinase, gamma 1b (muscle) [Source:ZFIN;Acc:ZDB-GENE-050522-52]	protein_coding	ENSDART00000101205,ENSDART00000129619,ENSDART00000182921
ENSDARG00000087706		17.5559		20.7927	533	24.0099	515	19.8856	397		16.452	355	12.5175	240	11.678	221		21.5627	13.5492	1.59614	0.67459	0.0034799	0.194187	16	21808418	21810668	-1	dicp3.3	diverse immunoglobulin domain-containing protein 3.3 [Source:ZFIN;Acc:ZDB-GENE-120306-20]	protein_coding	ENSDART00000156575
ENSDARG00000069264		17.3491		20.403	523	21.2153	455	19.3353	386		15.8504	342	13.7145	263	13.576	257		20.3179	14.3803	1.41299	0.498754	0.00350994	0.194187	1	54865552	54889501	1	si:ch211-196h16.5	si:ch211-196h16.5 [Source:ZFIN;Acc:ZDB-GENE-081029-8]	protein_coding	ENSDART00000145381,ENSDART00000193654
ENSDARG00000079738		22.1364		16.8563	432	20.9359	449	16.5838	331		26.4945	572	27.1949	522	24.7532	469		18.1253	26.1475	-1.45109	-0.537141	0.00351972	0.194187	7	73593814	73620363	1	znf219	zinc finger protein 219 [Source:NCBI gene;Acc:102997060]	protein_coding	ENSDART00000110544
ENSDARG00000052948		31.2798		26.366	676	9.38504	201	17.4843	349		37.5088	810	42.3407	813	54.5941	1035		17.7451	44.8145	-2.68428	-1.42453	0.00353051	0.194187	8	48603398	48604351	1	nppal	natriuretic peptide A-like [Source:ZFIN;Acc:ZDB-GENE-081022-175]	protein_coding	ENSDART00000074900
ENSDARG00000061145		56.6382		49.4387	1268	47.9499	1029	43.9985	879		72.8193	1573	66.1785	1271	59.4446	1127		47.129	66.1475	-1.40025	-0.48568	0.00354364	0.194187	7	29044888	29052468	1	gfod2	glucose-fructose oxidoreductase domain containing 2 [Source:ZFIN;Acc:ZDB-GENE-061103-64]	protein_coding	ENSDART00000086871
ENSDARG00000032623		57.0456		46.3207	1188	45.8074	983	45.4492	908		64.1189	1385	59.5165	1143	81.0608	1537		45.8591	68.2321	-1.47476	-0.560477	0.00355051	0.194187	17	26879725	26926577	-1	rcan3	regulator of calcineurin 3 [Source:ZFIN;Acc:ZDB-GENE-040718-445]	protein_coding	ENSDART00000045842,ENSDART00000050202
ENSDARG00000028546		503.164		466.812	11977	410.729	8818	401.089	8017		585.539	12652	558.497	10730	596.317	11310		426.21	580.118	-1.36387	-0.447703	0.00355274	0.194187	6	13206516	13231951	1	ndufs1	NADH:ubiquinone oxidoreductase core subunit S1 [Source:ZFIN;Acc:ZDB-GENE-030131-478]	protein_coding	ENSDART00000036927
ENSDARG00000018382		4.9637		5.82663	149	7.80146	167	6.47845	129		2.38335	51	2.78455	53	4.50777	85		6.70218	3.22522	2.15148	1.10533	0.00355682	0.194187	13	31716820	31748970	1	prkcha	protein kinase C, eta, a [Source:ZFIN;Acc:ZDB-GENE-080402-5]	protein_coding	ENSDART00000034745
ENSDARG00000096971		12.2464		9.84096	252	10.5494	226	8.37947	167		14.9248	322	16.6292	319	13.1543	249		9.58996	14.9028	-1.54949	-0.631796	0.00355889	0.194187	17	46387086	46439252	1	si:dkey-206p8.1	si:dkey-206p8.1 [Source:ZFIN;Acc:ZDB-GENE-131127-460]	protein_coding	ENSDART00000154499,ENSDART00000157079
ENSDARG00000053110		12.0248		7.85328	201	8.59325	184	8.47952	169		20.5245	443	14.6514	281	12.0471	228		8.30868	15.741	-1.86707	-0.900774	0.00355958	0.194187	20	40371897	40451115	-1	pkib	protein kinase (cAMP-dependent, catalytic) inhibitor beta [Source:ZFIN;Acc:ZDB-GENE-041014-312]	protein_coding	ENSDART00000075092
ENSDARG00000033738		359.9		398.725	10230	392.146	8419	462.071	9236		289.634	6258	299.04	5745	317.785	6027		417.647	302.153	1.37956	0.464207	0.00356007	0.194187	23	28374458	28388513	1	zgc:153867	zgc:153867 [Source:ZFIN;Acc:ZDB-GENE-030131-9170]	protein_coding	ENSDART00000014983,ENSDART00000128831,ENSDART00000135178,ENSDART00000138621,ENSDART00000140058,ENSDART00000144051,ENSDART00000144240,ENSDART00000145327,ENSDART00000162722,ENSDART00000188915
ENSDARG00000061747		7.31245		12.2574	314	10.3166	221	7.22885	144		3.86426	83	5.64717	108	4.56049	86		9.93426	4.69064	2.13573	1.09473	0.003562	0.194187	9	33863523	33877514	-1	dipk2b	divergent protein kinase domain 2B [Source:ZFIN;Acc:ZDB-GENE-110411-223]	protein_coding	ENSDART00000088441,ENSDART00000150035,ENSDART00000183210
ENSDARG00000033516		26.8468		24.6122	631	21.8208	468	17.7845	355		30.0116	648	32.5558	625	34.296	650		21.4058	32.2878	-1.51227	-0.596718	0.00356327	0.194187	17	33232748	33289349	-1	efr3ba	EFR3 homolog Ba (S. cerevisiae) [Source:ZFIN;Acc:ZDB-GENE-030616-64]	protein_coding	ENSDART00000040346,ENSDART00000135118,ENSDART00000147305
ENSDARG00000070995		16.1013		13.0368	334	8.63982	185	10.0804	201		19.8766	429	28.3399	544	16.6339	315		10.5857	21.6168	-2.00153	-1.0011	0.00357085	0.194187	6	14172884	14292329	-1	inpp4ab	inositol polyphosphate-4-phosphatase type I Ab [Source:ZFIN;Acc:ZDB-GENE-081104-521]	protein_coding	ENSDART00000061745,ENSDART00000177852
ENSDARG00000075433		512.649		405.194	10396	476.168	10223	366.07	7317		657.78	14213	615.697	11829	554.983	10526		415.811	609.487	-1.47085	-0.556655	0.00358498	0.194187	11	11200550	11262062	1	myom2a	myomesin 2a [Source:ZFIN;Acc:ZDB-GENE-030131-6201]	protein_coding	ENSDART00000087105,ENSDART00000158682,ENSDART00000159603,ENSDART00000171521,ENSDART00000171916,ENSDART00000172438,ENSDART00000181339,ENSDART00000187116
ENSDARG00000078389		19.7319		27.7691	712	21.7742	467	23.5375	470		15.943	344	12.1011	232	17.2666	327		24.3603	15.1035	1.62462	0.700103	0.0035978	0.194187	13	37623276	37631092	-1	ifi46	interferon alpha inducible protein 46 [Source:ZFIN;Acc:ZDB-GENE-090312-190]	protein_coding	ENSDART00000108855
ENSDARG00000079782		25009.7		21413.1	549418	22627.8	485826	16888.8	337596		29543	638372	30243.3	581069	29342	556536		20309.9	29709.4	-1.47431	-0.560042	0.00360449	0.194187	2	24274293	24289726	-1	myh7l	myosin heavy chain 7-like [Source:ZFIN;Acc:ZDB-GENE-061027-393]	protein_coding	ENSDART00000123565,ENSDART00000124461,ENSDART00000128784,ENSDART00000138076,ENSDART00000141922,ENSDART00000146213,ENSDART00000152105,ENSDART00000184550,ENSDART00000191469
ENSDARG00000030465		32.7898		35.8757	920	36.5388	784	40.9468	818		26.8647	580	28.9125	555	27.6002	523		37.7871	27.7925	1.35777	0.44124	0.00361299	0.194187	18	15259388	15269272	-1	tmem263	transmembrane protein 263 [Source:NCBI gene;Acc:406415]	protein_coding	ENSDART00000048206
ENSDARG00000024877		85.7085		103.301	2650	115.019	2469	100.328	2005		64.2115	1387	80.8039	1552	50.5872	959		106.216	65.2009	1.65603	0.72773	0.00361466	0.194187	7	24375070	24390879	-1	ptgr1	prostaglandin reductase 1 [Source:ZFIN;Acc:ZDB-GENE-041212-80]	protein_coding	ENSDART00000036680,ENSDART00000137661,ENSDART00000141769,ENSDART00000146784
ENSDARG00000092398		9.17586		5.43689	139	6.68364	143	6.92869	138		11.6853	252	15.0678	289	9.25279	175		6.34974	12.002	-1.88031	-0.910968	0.00361538	0.194187	21	30886127	30888374	-1		uncharacterized LOC101886778 [Source:NCBI gene;Acc:101886778]	processed_transcript	ENSDART00000133945
ENSDARG00000055647		66.1079		77.8118	1996	78.6434	1688	72.7638	1454		59.6299	1288	50.252	965	57.5466	1091		76.4063	55.8095	1.37182	0.456087	0.0036279	0.194187	5	30707133	30715225	-1	ftr82	finTRIM family, member 82 [Source:ZFIN;Acc:ZDB-GENE-030219-207]	protein_coding	ENSDART00000016758
ENSDARG00000018600		85.3802		64.1709	1646	80.2269	1722	58.056	1160		101.836	2200	93.3995	1794	114.592	2173		67.4846	103.276	-1.53922	-0.622202	0.00363231	0.194187	3	39181387	39190317	-1	retsat	retinol saturase (all-trans-retinol 13,14-reductase) [Source:NCBI gene;Acc:325922]	protein_coding	ENSDART00000013167
ENSDARG00000075463		17.857		13.7774	353	16.4646	353	10.6307	212		21.8203	471	24.072	462	20.3772	386		13.6242	22.0899	-1.63716	-0.711192	0.00363735	0.194187	24	39105051	39114123	1	mss51	MSS51 mitochondrial translational activator [Source:ZFIN;Acc:ZDB-GENE-130530-775]	protein_coding	ENSDART00000115297,ENSDART00000156353
ENSDARG00000086374		5.5612		6.99585	179	7.80146	167	8.32944	166		5.11378	110	3.09683	59	2.02981	38		7.70892	3.41348	2.36601	1.24246	0.00365097	0.194187	5	20112032	20113284	1	isg15	ISG15 ubiquitin like modifier [Source:ZFIN;Acc:ZDB-GENE-021211-1]	protein_coding	ENSDART00000130554
ENSDARG00000070006		18.2064		18.9609	486	22.5194	483	23.5876	471		14.0918	304	14.183	272	15.8958	301		21.6893	14.7235	1.46611	0.551997	0.00365368	0.194187	7	15818778	15830251	-1	rcn1	reticulocalbin 1, EF-hand calcium binding domain [Source:ZFIN;Acc:ZDB-GENE-080225-33]	protein_coding	ENSDART00000102363,ENSDART00000173136
ENSDARG00000078768		3.93405		5.31997	136	4.91375	105	4.72752	94		2.61474	56	2.68045	51	3.34788	63		4.98708	2.88102	1.75285	0.809699	0.00365707	0.194187	15	24946321	24960781	-1	abhd15a	abhydrolase domain containing 15a [Source:ZFIN;Acc:ZDB-GENE-131121-270]	protein_coding	ENSDART00000109990,ENSDART00000186706
ENSDARG00000061081		32.5091		24.4952	628	22.892	491	23.4875	469		47.5975	1028	46.5566	894	30.0254	569		23.6249	41.3932	-1.71602	-0.779065	0.00366367	0.194187	19	42886413	42917226	1	arpp21	cAMP-regulated phosphoprotein, 21 [Source:ZFIN;Acc:ZDB-GENE-081104-296]	protein_coding	ENSDART00000051724,ENSDART00000151298
ENSDARG00000077410		13.6484		15.882	407	16.418	352	17.5844	351		8.49212	183	12.2052	234	11.309	214		16.6281	10.6687	1.58242	0.662135	0.00370754	0.195487	2	37684922	37744951	-1	myo9b	myosin IXb [Source:ZFIN;Acc:ZDB-GENE-030131-938]	protein_coding	ENSDART00000088040,ENSDART00000143725,ENSDART00000144807,ENSDART00000191057
ENSDARG00000092638		19.1671		25.6645	658	24.6619	529	20.2358	404		12.2407	264	17.3058	332	14.8941	282		23.5207	14.8135	1.60547	0.682997	0.0037489	0.195487	19	16222618	16657563	1	ptprua	protein tyrosine phosphatase receptor type Ua [Source:ZFIN;Acc:ZDB-GENE-060503-232]	protein_coding	ENSDART00000137189,ENSDART00000151254,ENSDART00000169246,ENSDART00000189521,ENSDART00000190583
ENSDARG00000103937		947.395		652.134	16732	886.502	19033	653.173	13056		1016.99	21975	1144.03	21980	1331.53	25255		730.603	1164.19	-1.60089	-0.678878	0.0037588	0.195487	25	13332280	13381854	-1	ndrg4	NDRG family member 4 [Source:ZFIN;Acc:ZDB-GENE-060512-226]	protein_coding	ENSDART00000163735,ENSDART00000164297,ENSDART00000164621,ENSDART00000169119,ENSDART00000169129
ENSDARG00000001807		10.4863		15.9209	408	11.807	253	11.8813	237		8.9549	193	7.1045	136	7.24934	137		13.2031	7.76958	1.69689	0.762892	0.00377614	0.195487	20	35797998	35841570	-1	tnfrsf21	tumor necrosis factor receptor superfamily, member 21 [Source:ZFIN;Acc:ZDB-GENE-030131-5971]	protein_coding	ENSDART00000037855
ENSDARG00000079578		1129.86		1000.87	25680	1007.13	21623	796.3	15917		1320.49	28533	1334.06	25631	1320.3	25042		934.769	1324.95	-1.4258	-0.511774	0.00377869	0.195487	7	48252638	48263633	-1	rbpms2b	RNA binding protein, mRNA processing factor 2b [Source:ZFIN;Acc:ZDB-GENE-040426-741]	protein_coding	ENSDART00000006619,ENSDART00000134832,ENSDART00000135671,ENSDART00000136708,ENSDART00000139279,ENSDART00000142370,ENSDART00000147968,ENSDART00000148273
ENSDARG00000068233		56.6915		57.1945	1467	71.2844	1530	79.4173	1587		48.338	1044	38.0728	731	45.8422	869		69.2987	44.0843	1.5655	0.646621	0.00378522	0.195487	5	26869580	26879321	-1	zgc:64051	zgc:64051 [Source:ZFIN;Acc:ZDB-GENE-040426-1349]	protein_coding	ENSDART00000098571,ENSDART00000131241,ENSDART00000139086
ENSDARG00000060875		30.0381		28.5875	733	19.6317	421	18.3848	367		39.8227	860	41.4039	795	32.3979	614		22.2013	37.8748	-1.71983	-0.782263	0.00381957	0.195487	9	44498182	44642108	-1	pde1a	phosphodiesterase 1A, calmodulin-dependent [Source:ZFIN;Acc:ZDB-GENE-090831-2]	protein_coding	ENSDART00000086202,ENSDART00000140689,ENSDART00000191842
ENSDARG00000016160		202.878		191.655	4917	165.321	3549	140	2798		243.772	5267	238.977	4591	237.541	4505		165.659	240.097	-1.46133	-0.547286	0.00381969	0.195487	19	32472996	32487469	-1	gmpr	guanosine monophosphate reductase [Source:ZFIN;Acc:ZDB-GENE-050522-48]	protein_coding	ENSDART00000050130
ENSDARG00000062054		260.313		217.144	5571	237.001	5088	185.874	3715		301.482	6514	285.091	5477	335.288	6359		213.34	307.287	-1.44439	-0.530465	0.00383248	0.195487	25	23591990	23645806	1	cpt1ab	carnitine palmitoyltransferase 1Ab (liver) [Source:ZFIN;Acc:ZDB-GENE-030131-3250]	protein_coding	ENSDART00000089199,ENSDART00000151938
ENSDARG00000103044		1.35302		3.56613	91	1.42056	30	1.92603	38		0.578482	12	0.442405	8	0.184529	3		2.30424	0.401805	5.99455	2.58365	0.00383318	0.195487	KN150552.1	10471	53083	1		argininosuccinate synthase 1 [Source:HGNC Symbol;Acc:HGNC:758]	protein_coding	ENSDART00000170382
ENSDARG00000069189		4.79949		4.03382	103	3.14387	67	3.57691	71		5.94679	128	6.42788	123	5.66766	107		3.58487	6.01411	-1.67415	-0.743429	0.00383322	0.195487	18	19120984	19124312	1	si:dkey-242h9.3	si:dkey-242h9.3 [Source:ZFIN;Acc:ZDB-GENE-060503-347]	protein_coding	ENSDART00000141501,ENSDART00000143440
ENSDARG00000039273		16.0598		19.4286	498	20.9824	450	20.7861	415		10.3895	224	8.71798	167	16.054	304		20.399	11.7205	1.80331	0.850648	0.0038578	0.195487	13	33155428	33170733	-1	fbln5	fibulin 5 [Source:ZFIN;Acc:ZDB-GENE-041010-54]	protein_coding	ENSDART00000057382
ENSDARG00000039265		13.327		14.323	367	16.6043	356	16.4838	329		10.297	222	11.7888	226	10.4654	198		15.8037	10.8504	1.45326	0.539297	0.00387779	0.195487	23	24989387	25015393	1	arhgap4a	Rho GTPase activating protein 4a [Source:ZFIN;Acc:ZDB-GENE-040426-1229]	protein_coding	ENSDART00000145307,ENSDART00000172299
ENSDARG00000079962		2.07137		1.73435	44	0.861654	18	1.02555	20		3.30892	71	2.94069	56	2.55704	48		1.20718	2.93555	-2.49209	-1.31736	0.00389285	0.195487	8	13849999	13955872	1	doc2d	double C2-like domains, delta [Source:ZFIN;Acc:ZDB-GENE-081104-451]	protein_coding	ENSDART00000140374,ENSDART00000143784,ENSDART00000144398
ENSDARG00000076416		14.5971		16.4666	422	16.6509	357	18.685	373		10.9912	237	11.4765	220	13.3124	252		17.2675	11.9267	1.45086	0.536905	0.0038952	0.195487	6	30430591	30456075	1	shroom2a	shroom family member 2a [Source:ZFIN;Acc:ZDB-GENE-050208-128]	protein_coding	ENSDART00000108943
ENSDARG00000039729		38.8518		46.1259	1183	47.1581	1012	41.9974	839		34.6858	749	33.909	651	29.2346	554		45.0938	32.6098	1.38442	0.469278	0.00393306	0.195487	24	10897768	11057305	-1	asap1b	ArfGAP with SH3 domain, ankyrin repeat and PH domain 1b [Source:ZFIN;Acc:ZDB-GENE-091112-16]	protein_coding	ENSDART00000030409,ENSDART00000131204,ENSDART00000133530,ENSDART00000144372,ENSDART00000145466,ENSDART00000186494,ENSDART00000191248,ENSDART00000191320,ENSDART00000191943
ENSDARG00000112045		22.2788		25.3137	649	24.5688	527	31.9921	639		15.1562	327	20.3246	390	16.3176	309		27.2915	17.2661	1.58239	0.662109	0.00394883	0.195487	15	58207	85774	1		AXL receptor tyrosine kinase [Source:NCBI gene;Acc:100330721]	protein_coding	ENSDART00000187260,ENSDART00000188397
ENSDARG00000094782		3.51036		4.73536	121	4.16854	89	4.57744	91		2.66102	57	2.78455	53	2.13526	40		4.49378	2.52694	1.7871	0.837618	0.00394929	0.195487	1	54834119	54861588	1	si:ch211-196h16.4	si:ch211-196h16.4 [Source:ZFIN;Acc:ZDB-GENE-081029-1]	protein_coding	ENSDART00000140020,ENSDART00000145070
ENSDARG00000005023		83.0047		86.3472	2215	103.981	2232	116.087	2320		55.9276	1208	58.5796	1125	77.1066	1462		102.138	63.8713	1.60425	0.6819	0.00395541	0.195487	19	42591150	42607451	-1	fkbp9	FKBP prolyl isomerase 9 [Source:ZFIN;Acc:ZDB-GENE-040801-23]	protein_coding	ENSDART00000004392,ENSDART00000151291
ENSDARG00000098834		24.2002		27.9639	717	28.714	616	29.1405	582		16.8685	364	22.8749	439	19.6391	372		28.6062	19.7942	1.45918	0.545153	0.00395646	0.195487	16	68069	71108	1	sox4b	SRY-box transcription factor 4b [Source:ZFIN;Acc:ZDB-GENE-040426-1274]	protein_coding	ENSDART00000159652,ENSDART00000185385
ENSDARG00000079402		15.3201		16.5445	424	18.8865	405	20.2358	404		11.4539	247	10.6437	204	14.156	268		18.5556	12.0846	1.53899	0.62198	0.00395963	0.195487	19	7038694	7043355	-1	tapbp.1	TAP binding protein (tapasin), tandem duplicate 1 [Source:ZFIN;Acc:ZDB-GENE-010110-2]	protein_coding	ENSDART00000104845
ENSDARG00000077054		25.6807		34.4336	883	27.5031	590	34.0432	680		19.5527	422	23.4995	451	15.0523	285		31.9933	19.3682	1.66961	0.739515	0.00396694	0.195487	14	35876876	35883019	-1	gask1b	golgi associated kinase 1B [Source:ZFIN;Acc:ZDB-GENE-100105-1]	protein_coding	ENSDART00000112379
ENSDARG00000043475		22.3595		23.7547	609	27.1304	582	36.3444	726		12.3332	266	19.7	378	14.8941	282		29.0765	15.6425	1.86582	0.899807	0.00397501	0.195487	20	13647987	13673566	-1	si:ch211-122h15.4	si:ch211-122h15.4 [Source:ZFIN;Acc:ZDB-GENE-121214-340]	protein_coding	ENSDART00000063826,ENSDART00000127654,ENSDART00000152804,ENSDART00000181641
ENSDARG00000053066		11.3608		15.804	405	11.1083	238	16.7339	334		7.28887	157	8.92617	171	8.30379	157		14.5488	8.17294	1.7659	0.820406	0.00397843	0.195487	6	49881864	49888418	1	tubb1	tubulin, beta 1 class VI [Source:ZFIN;Acc:ZDB-GENE-110408-5]	protein_coding	ENSDART00000075040
ENSDARG00000007294		1072.49		960.069	24633	816.964	17540	804.254	16076		1316.56	28448	1092.97	20999	1444.09	27390		860.429	1284.54	-1.48808	-0.573451	0.00399253	0.195586	12	19106571	19119176	-1	aco2	aconitase 2, mitochondrial [Source:ZFIN;Acc:ZDB-GENE-030131-1390]	protein_coding	ENSDART00000149180
ENSDARG00000079462		40.5267		34.3557	881	30.0647	645	26.7393	534		61.805	1335	49.7835	956	40.4118	766		30.3866	50.6668	-1.64892	-0.721525	0.00402411	0.195726	12	6002715	6006865	1	si:ch211-131k2.3	si:ch211-131k2.3 [Source:ZFIN;Acc:ZDB-GENE-121214-210]	protein_coding	ENSDART00000114961
ENSDARG00000075748		71.0354		75.9021	1947	84.4188	1812	87.1214	1741		53.7525	1161	64.0966	1231	60.9208	1155		82.4808	59.59	1.38568	0.470592	0.00403655	0.195726	11	141504	159328	1	zgc:172352	zgc:172352 [Source:ZFIN;Acc:ZDB-GENE-080204-117]	protein_coding	ENSDART00000086166
ENSDARG00000088440		80.1641		68.8478	1766	64.5309	1385	61.858	1236		108.222	2338	96.8866	1861	80.639	1529		65.0789	95.2493	-1.45434	-0.540365	0.00404623	0.195726	15	28545143	28587490	-1	ssh2a	slingshot protein phosphatase 2a [Source:ZFIN;Acc:ZDB-GENE-030131-3810]	protein_coding	ENSDART00000127845,ENSDART00000156049,ENSDART00000186196
ENSDARG00000070542		19.8874		22.7024	582	26.4318	567	27.8899	557		9.78792	211	13.5584	260	18.9537	359		25.6747	14.1	1.89232	0.920156	0.00405027	0.195726	11	25382602	25384213	-1	mafbb	v-maf avian musculoaponeurotic fibrosarcoma oncogene homolog Bb [Source:ZFIN;Acc:ZDB-GENE-010605-4]	protein_coding	ENSDART00000103650
ENSDARG00000059888		0.737114		1.07179	27	1.14111	24	1.02555	20		0.347089	7	0.494452	9	0.342696	6		1.07948	0.394746	2.78165	1.47594	0.00405594	0.195726	16	51001957	51072406	-1	ago3a	argonaute RISC catalytic component 3a [Source:ZFIN;Acc:ZDB-GENE-051107-16]	protein_coding	ENSDART00000083777
ENSDARG00000009087		546.234		590.166	15142	747.613	16051	679.237	13577		329.064	7110	468.871	9008	462.455	8771		672.338	420.13	1.61327	0.689987	0.00407565	0.196092	14	3038473	3052361	1	cd74a	CD74 molecule, major histocompatibility complex, class II invariant chain a [Source:ZFIN;Acc:ZDB-GENE-000901-1]	protein_coding	ENSDART00000026021,ENSDART00000149844,ENSDART00000150000
ENSDARG00000061365		0.807301		1.18871	30	1.14111	24	1.22565	24		0.347089	7	0.598548	11	0.342696	6		1.18516	0.429444	2.8686	1.52035	0.00411302	0.196647	19	40350468	40374428	1	hepacam2	HEPACAM family member 2 [Source:ZFIN;Acc:ZDB-GENE-060503-135]	protein_coding	ENSDART00000087444
ENSDARG00000075556		45.2022		55.6356	1427	49.4869	1062	54.5041	1089		36.9534	798	42.3407	813	32.2925	612		53.2088	37.1956	1.4373	0.523359	0.00411365	0.196647	17	28005763	28071945	1	luzp1	leucine zipper protein 1 [Source:ZFIN;Acc:ZDB-GENE-060810-90]	protein_coding	ENSDART00000155838
ENSDARG00000018149		86.0314		75.1616	1928	39.5196	848	64.7095	1293		122.199	2640	116.457	2237	98.1428	1861		59.7969	112.266	-1.93681	-0.953682	0.00412368	0.196647	4	1516716	1566572	1	slc38a4	solute carrier family 38 member 4 [Source:ZFIN;Acc:ZDB-GENE-041010-14]	protein_coding	ENSDART00000067446,ENSDART00000149826,ENSDART00000150198
ENSDARG00000077083		17.9108		12.9979	333	15.1139	324	10.8808	217		21.4964	464	28.444	546	18.5319	351		12.9975	22.8241	-1.73868	-0.797996	0.00413935	0.196814	25	1549838	1558398	1	avpr1aa	arginine vasopressin receptor 1Aa [Source:ZFIN;Acc:ZDB-GENE-101028-2]	protein_coding	ENSDART00000115001
ENSDARG00000002701		9.16815		6.60611	169	8.03434	172	5.37787	107		9.69536	209	13.09	251	12.2052	231		6.67277	11.6635	-1.74287	-0.801464	0.00422157	0.199096	7	13756215	13782279	1	rasl12	RAS-like, family 12 [Source:NCBI gene;Acc:393366]	protein_coding	ENSDART00000018801,ENSDART00000115054,ENSDART00000172804,ENSDART00000180808
ENSDARG00000096979		29.6746		36.9669	948	34.4894	740	47.8005	955		12.0556	260	22.6147	434	24.1205	457		39.7523	19.5969	2.11561	1.08108	0.00422221	0.199096	17	43021662	43022468	-1	zgc:193725	zgc:193725 [Source:ZFIN;Acc:ZDB-GENE-080723-11]	protein_coding	ENSDART00000002945
ENSDARG00000019949		23.7103		25.3916	651	31.5552	677	28.4902	569		16.3132	352	18.7111	359	21.8007	413		28.479	18.9417	1.5103	0.594831	0.0042243	0.199096	15	29382454	29388012	-1	serpinh1b	serpin peptidase inhibitor, clade H (heat shock protein 47), member 1b [Source:ZFIN;Acc:ZDB-GENE-990415-93]	protein_coding	ENSDART00000035096,ENSDART00000115032,ENSDART00000133845,ENSDART00000145976,ENSDART00000152365
ENSDARG00000103542		35.0212		31.7444	814	24.1496	518	30.3412	606		40.1004	866	43.5378	836	40.2536	763		28.7451	41.2973	-1.44441	-0.53048	0.00425969	0.199513	16	4287542	4317879	-1	vegfaa	vascular endothelial growth factor Aa [Source:NCBI gene;Acc:30682]	protein_coding	ENSDART00000167719
ENSDARG00000033140		56.1642		54.8171	1406	40.7306	874	39.8963	797		65.5999	1417	71.4354	1372	64.5059	1223		45.148	67.1804	-1.50194	-0.586831	0.00426522	0.199513	3	24973025	24980067	-1	desi1a	desumoylating isopeptidase 1a [Source:ZFIN;Acc:ZDB-GENE-040426-1657]	protein_coding	ENSDART00000048871
ENSDARG00000009624		16.1422		11.4779	294	14.0892	302	10.8808	217		22.2831	481	15.9526	306	22.1698	420		12.1493	20.1352	-1.65142	-0.723703	0.00428356	0.199513	12	28117365	28181720	1		urotensin 2 receptor [Source:NCBI gene;Acc:559133]	protein_coding	ENSDART00000066290
ENSDARG00000005870		48.2008		44.2941	1136	40.6374	872	38.2954	765		58.7044	1268	54.1555	1040	53.1179	1007		41.0757	55.3259	-1.34769	-0.43049	0.00430662	0.199513	9	23049500	23056240	1	mmadhc	metabolism of cobalamin associated D [Source:ZFIN;Acc:ZDB-GENE-040704-50]	protein_coding	ENSDART00000012478
ENSDARG00000078546		8.52356		5.55381	142	6.91652	148	7.22885	144		9.74164	210	9.75893	187	11.9416	226		6.56639	10.4807	-1.61011	-0.687164	0.00431636	0.199513	1	29183962	29202689	1	cars2	cysteinyl-tRNA synthetase 2, mitochondrial [Source:ZFIN;Acc:ZDB-GENE-030131-5564]	protein_coding	ENSDART00000113735,ENSDART00000137055
ENSDARG00000067975		69.9191		58.2078	1493	63.3665	1360	57.0554	1140		78.3727	1693	75.5992	1452	86.913	1648		59.5432	80.295	-1.34755	-0.430335	0.00433319	0.199513	19	84052	85593	-1	atp5if1a	ATP synthase inhibitory factor subunit 1a [Source:NCBI gene;Acc:100037369]	protein_coding	ENSDART00000087242,ENSDART00000151243
ENSDARG00000103766		23.8871		30.6921	787	28.5743	613	32.4923	649		21.8203	471	11.5806	222	18.1629	344		30.5862	17.1879	1.82842	0.870597	0.00433409	0.199513	23	42336084	42341795	1	cyp2aa7	cytochrome P450, family 2, subfamily AA, polypeptide 7 [Source:ZFIN;Acc:ZDB-GENE-071004-48]	protein_coding	ENSDART00000158959,ENSDART00000169660
ENSDARG00000103370		30.1472		39.1105	1003	30.0182	644	38.2954	765		23.4401	506	25.5294	490	24.4896	464		35.808	24.4863	1.4542	0.540226	0.00433995	0.199513	2	22495274	22502251	1	lrrc8da	leucine rich repeat containing 8 VRAC subunit Da [Source:ZFIN;Acc:ZDB-GENE-061009-26]	protein_coding	ENSDART00000159638,ENSDART00000167915
ENSDARG00000062040		8.40248		11.3999	292	9.19874	197	9.88027	197		6.68725	144	6.94836	133	6.30033	119		10.1596	6.64531	1.53105	0.614519	0.00434694	0.199513	5	19261391	19296249	1	atp8b5a	ATPase phospholipid transporting 8B5a [Source:ZFIN;Acc:ZDB-GENE-060531-48]	protein_coding	ENSDART00000089173,ENSDART00000139401
ENSDARG00000030782		8.7071		9.37328	240	11.8536	254	10.9809	219		6.03935	130	6.27174	120	7.72384	146		10.7359	6.67831	1.60636	0.683793	0.00437083	0.199513	15	20139031	20190052	-1	exoc3l2b	exocyst complex component 3-like 2b [Source:ZFIN;Acc:ZDB-GENE-100728-5]	protein_coding	ENSDART00000048183,ENSDART00000157149
ENSDARG00000010018		40.8217		36.7331	942	31.6483	679	31.1416	622		48.4768	1047	54.8842	1054	42.0462	797		33.1743	48.4691	-1.45526	-0.541274	0.00439433	0.199513	12	34953038	35019519	1	qki2	QKI, KH domain containing, RNA binding 2 [Source:NCBI gene;Acc:393815]	protein_coding	ENSDART00000027034,ENSDART00000123988,ENSDART00000153007,ENSDART00000153020,ENSDART00000187022
ENSDARG00000069105		68.8216		59.7278	1532	59.5473	1278	58.156	1162		72.4491	1565	82.9379	1593	80.1118	1519		59.1437	78.4996	-1.32524	-0.406257	0.00440266	0.199513	21	37183124	37194839	-1	fgfr4	fibroblast growth factor receptor 4 [Source:NCBI gene;Acc:100000160]	protein_coding	ENSDART00000100286,ENSDART00000175126,ENSDART00000192748
ENSDARG00000078696		1251.29		1071.85	27501	1053.24	22613	824.264	16476		1781.19	38488	1416.24	27210	1360.95	25813		983.118	1519.46	-1.54527	-0.627863	0.0044047	0.199513	12	26408351	26430507	-1	synpo2lb	synaptopodin 2-like b [Source:ZFIN;Acc:ZDB-GENE-090828-5]	protein_coding	ENSDART00000113978,ENSDART00000153214,ENSDART00000185779
ENSDARG00000097470		8.99048		11.2051	287	11.9467	256	10.6807	213		5.11378	110	6.32379	121	8.67284	164		11.2775	6.70347	1.73655	0.796223	0.00440887	0.199513	16	21807422	21808355	-1			processed_transcript	ENSDART00000153516
ENSDARG00000097770		39.313		30.848	791	23.5441	505	34.0932	681		39.545	854	54.5719	1048	53.276	1010		29.4951	49.131	-1.66819	-0.738284	0.00441827	0.199513	15	23799461	23801499	1	si:ch211-167j9.4	si:ch211-167j9.4 [Source:ZFIN;Acc:ZDB-GENE-131121-196]	protein_coding	ENSDART00000154885
ENSDARG00000030616		18.858		16.7394	429	9.57134	205	15.2831	305		24.8747	537	22.8749	439	23.8042	451		13.8646	23.8513	-1.76032	-0.815836	0.0044709	0.200418	3	24072720	24093144	-1	nfe2l1a	nuclear factor, erythroid 2-like 1a [Source:ZFIN;Acc:ZDB-GENE-040630-5]	protein_coding	ENSDART00000103982
ENSDARG00000098288		44.3289		39.6172	1016	37.9826	815	37.7952	755		52.3642	1131	49.3672	948	48.8473	926		38.465	50.1929	-1.30447	-0.38346	0.00449374	0.200418	19	19549062	19599372	-1	tax1bp1a	Tax1 (human T-cell leukemia virus type I) binding protein 1a [Source:NCBI gene;Acc:561219]	protein_coding	ENSDART00000160002,ENSDART00000164060,ENSDART00000171664
ENSDARG00000116680		157.497		133.272	3419	140.263	3011	119.989	2398		174.91	3779	170.378	3273	206.171	3910		131.175	183.82	-1.39927	-0.484678	0.00450553	0.200418	10	3299829	3322338	1	zgc:56235	zgc:56235 [Source:ZFIN;Acc:ZDB-GENE-040426-954]	protein_coding	ENSDART00000183684
ENSDARG00000021220		35.3225		29.406	754	33.325	715	27.2895	545		40.5632	876	40.6232	780	40.7281	772		30.0069	40.6381	-1.35849	-0.442007	0.004569	0.200418	17	24855384	24866964	-1	hmgcl	3-hydroxy-3-methylglutaryl-CoA lyase [Source:ZFIN;Acc:ZDB-GENE-040426-958]	protein_coding	ENSDART00000027957,ENSDART00000136034,ENSDART00000190601,ENSDART00000192547
ENSDARG00000045064		296.817		274.124	7033	251.906	5408	207.135	4140		338.273	7309	371.802	7143	337.661	6404		244.388	349.245	-1.43762	-0.523677	0.00457445	0.200418	12	30046320	30220346	1	ablim1b	actin binding LIM protein 1b [Source:ZFIN;Acc:ZDB-GENE-050327-91]	protein_coding	ENSDART00000042572,ENSDART00000132335,ENSDART00000138252,ENSDART00000140600,ENSDART00000142756,ENSDART00000145628,ENSDART00000153025,ENSDART00000153394,ENSDART00000179904,ENSDART00000193405
ENSDARG00000089805		5.29016		3.9169	100	4.35484	93	3.27675	65		7.24259	156	5.59512	107	7.35478	139		3.8495	6.73083	-1.74413	-0.802512	0.00457624	0.200418	1	13260809	13271569	-1	pcdh18a	protocadherin 18a [Source:ZFIN;Acc:ZDB-GENE-000607-1]	protein_coding	ENSDART00000127838,ENSDART00000193663
ENSDARG00000059751		4.32172		2.66973	68	3.42333	73	3.27675	65		5.62284	121	6.27174	120	4.66594	88		3.12327	5.52017	-1.7813	-0.832927	0.00457826	0.200418	7	49272702	49320952	1	abtb2a	ankyrin repeat and BTB (POZ) domain containing 2a [Source:ZFIN;Acc:ZDB-GENE-100422-13]	protein_coding	ENSDART00000083389
ENSDARG00000060248		13.6333		13.6215	349	17.8153	382	19.9857	399		9.04746	195	9.86302	189	11.4671	217		17.1408	10.1259	1.67351	0.742875	0.00458383	0.200418	4	3312852	3338940	1	fgd4b	FYVE, RhoGEF and PH domain containing 4b [Source:ZFIN;Acc:ZDB-GENE-110421-6]	protein_coding	ENSDART00000084691
ENSDARG00000041609		100.109		134.948	3462	126.477	2715	104.281	2084		88.9705	1922	82.1572	1578	63.8205	1210		121.902	78.3161	1.56246	0.643821	0.00458937	0.200418	22	12641580	12693837	-1	adarb1a	adenosine deaminase RNA specific B1a [Source:ZFIN;Acc:ZDB-GENE-000627-2]	protein_coding	ENSDART00000044574,ENSDART00000129768
ENSDARG00000071697		95.3675		115.578	2965	107.194	2301	112.285	2244		67.127	1450	82.001	1575	88.0201	1669		111.686	79.0494	1.42118	0.507094	0.00459036	0.200418	14	20918701	21001756	1	zgc:66433	zgc:66433 [Source:ZFIN;Acc:ZDB-GENE-030131-9832]	protein_coding	ENSDART00000106198,ENSDART00000106212,ENSDART00000135907,ENSDART00000136500,ENSDART00000144736,ENSDART00000148204,ENSDART00000166366,ENSDART00000182539,ENSDART00000185616
ENSDARG00000074756		40.7183		34.9013	895	35.7004	766	32.2922	645		52.4567	1133	43.4858	835	45.4731	862		34.298	47.1385	-1.37104	-0.455269	0.00459632	0.200418	17	12058509	12073355	1	tfb2m	transcription factor B2, mitochondrial [Source:ZFIN;Acc:ZDB-GENE-070521-3]	protein_coding	ENSDART00000150209
ENSDARG00000008192		21.8675		19.5065	500	19.2591	413	15.083	301		26.911	581	25.165	483	25.2804	479		17.9496	25.7855	-1.44098	-0.527048	0.0045969	0.200418	17	23554932	23575465	1	pank1a	pantothenate kinase 1a [Source:ZFIN;Acc:ZDB-GENE-040426-2846]	protein_coding	ENSDART00000135814,ENSDART00000143508,ENSDART00000146787
ENSDARG00000073950		1.95584		2.00717	51	3.33017	71	3.27675	65		0.763596	16	1.17107	22	1.18626	22		2.87136	1.04031	2.71532	1.44112	0.00461026	0.200418	16	11960588	11963804	-1	cd4-2.2	CD4-2 molecule, tandem duplicate 2 [Source:ZFIN;Acc:ZDB-GENE-100922-127]	protein_coding	ENSDART00000103971,ENSDART00000135379
ENSDARG00000055290		79.9834		85.2949	2188	115.718	2484	107.482	2148		43.8952	948	50.7725	975	76.7375	1455		102.832	57.1351	1.83814	0.87825	0.00461186	0.200418	8	29710110	29713621	-1	mpeg1.1	macrophage expressed 1, tandem duplicate 1 [Source:ZFIN;Acc:ZDB-GENE-030131-7347]	protein_coding	ENSDART00000077637,ENSDART00000131988
ENSDARG00000061391		12.3568		8.86661	227	11.1549	239	7.37893	147		18.442	398	13.2461	254	15.0523	285		9.13349	15.5801	-1.71615	-0.779175	0.00464122	0.201036	17	32391056	32426413	-1	grhl1	grainyhead-like transcription factor 1 [Source:ZFIN;Acc:ZDB-GENE-030131-3665]	protein_coding	ENSDART00000148378,ENSDART00000148455,ENSDART00000148796,ENSDART00000149102,ENSDART00000149715,ENSDART00000149885,ENSDART00000179314
ENSDARG00000005749		41.2666		39.2274	1006	29.8784	641	32.3422	646		51.67	1116	44.5267	855	49.9545	947		33.816	48.7171	-1.44592	-0.531987	0.0046819	0.201036	22	31045277	31060579	-1	cand2	cullin-associated and neddylation-dissociated 2 (putative) [Source:ZFIN;Acc:ZDB-GENE-060503-645]	protein_coding	ENSDART00000022445,ENSDART00000182376
ENSDARG00000095865		59.1167		47.2171	1211	53.4924	1148	51.0022	1019		69.6261	1504	62.9516	1209	70.4108	1335		50.5706	67.6628	-1.33815	-0.420243	0.00468582	0.201036	16	43417632	43742318	-1	oxr1a	oxidation resistance 1a [Source:ZFIN;Acc:ZDB-GENE-080219-14]	processed_transcript	ENSDART00000149552,ENSDART00000159249
ENSDARG00000101181		12.5453		17.6748	453	16.0454	344	14.983	299		5.62284	121	11.0601	212	9.88546	187		16.2344	8.85614	1.93483	0.952209	0.00469253	0.201036	16	23403602	23406155	1	s100w	S100 calcium binding protein W [Source:ZFIN;Acc:ZDB-GENE-080407-2]	protein_coding	ENSDART00000159848,ENSDART00000170061
ENSDARG00000011233		14.0154		13.1538	337	10.2234	219	10.4806	209		16.5909	358	15.7444	302	17.8993	339		11.2859	16.7448	-1.48094	-0.56651	0.00469439	0.201036	2	9755422	9779959	1	pcyt1aa	phosphate cytidylyltransferase 1, choline, alpha a [Source:ZFIN;Acc:ZDB-GENE-050417-108]	protein_coding	ENSDART00000018524,ENSDART00000168972
ENSDARG00000008433		168.97		149.953	3847	126.104	2707	106.432	2127		247.243	5342	215.139	4133	168.949	3204		127.496	210.444	-1.64683	-0.719688	0.00470427	0.201036	8	11204059	11229523	-1	unc45b	unc-45 myosin chaperone B [Source:NCBI gene;Acc:266640]	protein_coding	ENSDART00000002164,ENSDART00000131171
ENSDARG00000017365		3.58866		4.9692	127	4.21512	90	5.42789	108		2.0594	44	3.30502	63	1.55531	29		4.87074	2.30658	2.2066	1.14183	0.00472246	0.201036	8	42917515	42986689	1	slc23a2	solute carrier family 23 member 2 [Source:ZFIN;Acc:ZDB-GENE-090521-3]	protein_coding	ENSDART00000021715,ENSDART00000183206
ENSDARG00000035809		1517.2		1536.69	39428	2012.19	43202	1847.86	36937		1123.44	24275	1259.53	24199	1323.47	25102		1798.92	1235.48	1.45049	0.536539	0.00472557	0.201036	12	3095699	3133483	-1	col1a1b	collagen, type I, alpha 1b [Source:ZFIN;Acc:ZDB-GENE-030131-4400]	protein_coding	ENSDART00000015092
ENSDARG00000004930		644.992		497.329	12760	579.287	12437	445.212	8899		931.981	20138	690.125	13259	726.014	13770		507.276	782.707	-1.53826	-0.6213	0.00474042	0.20109	9	21893757	21970067	-1	lmo7a	LIM domain 7a [Source:ZFIN;Acc:ZDB-GENE-030219-74]	protein_coding	ENSDART00000009920,ENSDART00000090782,ENSDART00000134084,ENSDART00000134768,ENSDART00000135395,ENSDART00000136349,ENSDART00000136534,ENSDART00000139614,ENSDART00000143305,ENSDART00000144843,ENSDART00000145085,ENSDART00000145576,ENSDART00000146528
ENSDARG00000003795		1669.96		1539.5	39500	1394.74	29945	1305.42	26094		1951.82	42175	1792.81	34445	2035.48	38607		1413.22	1926.7	-1.36471	-0.448593	0.00475173	0.20109	18	26096814	26101800	-1	idh2	isocitrate dehydrogenase (NADP(+)) 2 [Source:ZFIN;Acc:ZDB-GENE-031118-95]	protein_coding	ENSDART00000004692
ENSDARG00000060070		48.6447		49.6335	1273	64.3446	1381	56.8053	1135		38.8046	838	42.1846	810	40.0954	760		56.9278	40.3615	1.40357	0.489099	0.00481649	0.202388	7	37761524	37858666	-1	adcy7	adenylate cyclase 7 [Source:ZFIN;Acc:ZDB-GENE-040713-1]	protein_coding	ENSDART00000129156,ENSDART00000164485,ENSDART00000173552,ENSDART00000178306
ENSDARG00000042793		66.7536		70.017	1796	82.1366	1763	85.8208	1715		46.5794	1006	54.5199	1047	61.448	1165		79.3248	54.1824	1.46829	0.554139	0.00481885	0.202388	17	30843881	30855792	1	tpp1	tripeptidyl peptidase I [Source:NCBI gene;Acc:798347]	protein_coding	ENSDART00000148547,ENSDART00000149588,ENSDART00000149600
ENSDARG00000099860		56.449		32.1342	824	32.8127	704	50.652	1012		89.2482	1928	54.0515	1038	79.7954	1513		38.533	74.365	-1.93426	-0.951784	0.00483278	0.202388	25	29160102	29196558	1	pkmb	pyruvate kinase M1/2b [Source:ZFIN;Acc:ZDB-GENE-040801-230]	protein_coding	ENSDART00000162854,ENSDART00000180752
ENSDARG00000055955		15.8306		18.4153	472	18.0482	387	19.8856	397		15.0637	325	11.8929	228	11.678	221		18.783	12.8782	1.45987	0.545844	0.00485042	0.202388	21	30306369	30347592	1	lcp2a	lymphocyte cytosolic protein 2a [Source:ZFIN;Acc:ZDB-GENE-041114-97]	protein_coding	ENSDART00000059420,ENSDART00000145050
ENSDARG00000023536		617.601		558.207	14322	481.758	10343	489.186	9778		731.456	15805	635.632	12212	809.369	15351		509.717	725.485	-1.41972	-0.505608	0.00488	0.202388	21	19763546	19828423	-1	nnt	nicotinamide nucleotide transhydrogenase [Source:ZFIN;Acc:ZDB-GENE-040426-2592]	protein_coding	ENSDART00000037664
ENSDARG00000008697		21.3051		19.1168	490	18.281	392	13.2821	265		26.587	574	24.1761	464	26.3876	500		16.8933	25.7169	-1.53181	-0.615234	0.00488782	0.202388	12	25775734	25830268	1	epas1a	endothelial PAS domain protein 1a [Source:ZFIN;Acc:ZDB-GENE-030131-4490]	protein_coding	ENSDART00000024415,ENSDART00000149198
ENSDARG00000036415		16.6446		18.6101	477	18.8865	405	19.9857	399		14.3695	310	14.7035	282	13.3124	252		19.1608	14.1285	1.35467	0.437941	0.00489131	0.202388	1	52462068	52478746	1	glb1	galactosidase, beta 1 [Source:ZFIN;Acc:ZDB-GENE-050410-9]	protein_coding	ENSDART00000124682
ENSDARG00000012409		203.153		176.728	4534	182.275	3913	160.11	3200		216.884	4686	233.043	4477	249.878	4739		173.038	233.269	-1.34797	-0.430788	0.00490367	0.202388	23	21499585	21515182	-1	rnf207b	ring finger protein 207b [Source:NCBI gene;Acc:568322]	protein_coding	ENSDART00000138415,ENSDART00000142000
ENSDARG00000112073		11.0925		9.25635	237	8.36037	179	5.57797	111		14.3232	309	17.2538	331	11.7835	223		7.73157	14.4535	-1.86385	-0.898286	0.00490943	0.202388	4	75156398	75175407	-1			protein_coding	ENSDART00000180125
ENSDARG00000103826		247.906		218.976	5618	188.656	4050	157.209	3142		344.197	7437	334.692	6430	243.71	4622		188.28	307.533	-1.62908	-0.704055	0.00496743	0.202388	18	402048	423921	1	gpib	glucose-6-phosphate isomerase b [Source:ZFIN;Acc:ZDB-GENE-020513-3]	protein_coding	ENSDART00000166345
ENSDARG00000039222		6.31911		10.1917	261	11.0618	237	5.72805	114		2.7073	58	3.98164	76	4.24416	80		8.99385	3.64437	2.47277	1.30613	0.00498113	0.202388	6	33949280	33980881	-1	mpl	MPL proto-oncogene, thrombopoietin receptor [Source:ZFIN;Acc:ZDB-GENE-060421-1]	protein_coding	ENSDART00000057297,ENSDART00000124917,ENSDART00000151725
ENSDARG00000057671		124.251		109.849	2818	112.364	2412	96.9767	1938		147.744	3192	143.157	2750	135.418	2568		106.397	142.106	-1.33759	-0.419635	0.00498162	0.202388	13	8375612	8446341	-1	epas1b	endothelial PAS domain protein 1b [Source:ZFIN;Acc:ZDB-GENE-060607-11]	protein_coding	ENSDART00000080382
ENSDARG00000104808		97.067		124.23	3187	103.422	2220	110.634	2211		73.7449	1593	87.5181	1681	82.8533	1571		112.762	81.3721	1.38507	0.469964	0.00498569	0.202388	21	249970	294747	1	jak2a	Janus kinase 2a [Source:ZFIN;Acc:ZDB-GENE-980526-481]	protein_coding	ENSDART00000159883,ENSDART00000165303,ENSDART00000169026,ENSDART00000170719,ENSDART00000177919,ENSDART00000184072
ENSDARG00000096419		7.32517		8.90559	228	8.73298	187	9.02981	180		5.0675	109	5.33488	102	6.88028	130		8.88946	5.76089	1.56346	0.644738	0.00499245	0.202388	6	6995294	6997346	-1			lincRNA	ENSDART00000151386
ENSDARG00000008407		67.0906		58.6366	1504	54.3773	1167	61.3077	1225		75.5035	1631	74.6103	1433	78.1083	1481		58.1072	76.074	-1.31057	-0.390196	0.00499878	0.202388	22	11440705	11493236	-1	tspan7b	tetraspanin 7b [Source:ZFIN;Acc:ZDB-GENE-040927-5]	protein_coding	ENSDART00000002691
ENSDARG00000022995		570.233		508.32	13042	479.662	10298	452.566	9046		595.351	12864	658.168	12645	727.333	13795		480.183	660.284	-1.37227	-0.456568	0.0049995	0.202388	17	25444323	25480375	1	clic4	chloride intracellular channel 4 [Source:ZFIN;Acc:ZDB-GENE-030326-3]	protein_coding	ENSDART00000030691,ENSDART00000148592,ENSDART00000149804
ENSDARG00000092124		21.968		20.4809	525	17.3495	372	14.2326	284		28.8084	622	23.8638	458	27.073	513		17.3543	26.5817	-1.53569	-0.618888	0.00502252	0.202388	22	5752257	5756384	1	cox14	cytochrome c oxidase assembly factor COX14 [Source:NCBI gene;Acc:568423]	protein_coding	ENSDART00000143052
ENSDARG00000035650		14.2324		15.0635	386	17.955	385	19.3853	387		8.9549	193	12.6215	242	11.4144	216		17.4679	10.997	1.59709	0.675442	0.00502417	0.202388	17	30897292	30975978	-1	evla	Enah/Vasp-like a [Source:ZFIN;Acc:ZDB-GENE-000607-65]	protein_coding	ENSDART00000051697,ENSDART00000131633,ENSDART00000134517,ENSDART00000138346,ENSDART00000146824,ENSDART00000192663
ENSDARG00000071331		42.5316		37.0449	950	37.7032	809	32.0921	641		44.358	958	51.0847	981	52.907	1003		35.6134	49.4499	-1.38716	-0.472137	0.0050282	0.202388	20	29268444	29420713	-1	ryr3	ryanodine receptor 3 [Source:ZFIN;Acc:ZDB-GENE-041001-165]	protein_coding	ENSDART00000147464,ENSDART00000172634
ENSDARG00000078529		1.57386		2.24101	57	2.53839	54	1.92603	38		1.27266	27	0.858786	16	0.606308	11		2.23514	0.912585	2.52607	1.3369	0.00504683	0.202388	19	92570	103289	-1	adgrb1b	adhesion G protein-coupled receptor B1b [Source:ZFIN;Acc:ZDB-GENE-081031-45]	protein_coding	ENSDART00000141359,ENSDART00000143118,ENSDART00000179342
ENSDARG00000089767		41.1292		45.6582	1171	52.002	1116	44.0485	880		35.1023	758	36.4594	700	33.5051	635		47.2362	35.0223	1.34605	0.428729	0.00506394	0.202388	14	36765612	36863432	-1	rnf130	ring finger protein 130 [Source:ZFIN;Acc:ZDB-GENE-050522-525]	protein_coding	ENSDART00000109293,ENSDART00000158052,ENSDART00000168615
ENSDARG00000098257		40.4849		38.8377	996	30.5305	655	28.14	562		47.5049	1026	53.583	1029	44.3132	840		32.5027	48.4671	-1.49794	-0.582978	0.0050689	0.202388	13	41125358	41546779	-1	pcdh15a	protocadherin-related 15a [Source:ZFIN;Acc:ZDB-GENE-030616-3]	protein_coding	ENSDART00000163331,ENSDART00000164732,ENSDART00000188322
ENSDARG00000102556		5.94387		4.22869	108	5.10006	109	2.77648	55		7.33515	158	9.34255	179	6.88028	130		4.03508	7.85266	-1.96776	-0.976557	0.00507633	0.202388	7	67325933	67421313	1	nfat5b	nuclear factor of activated T cells 5b [Source:ZFIN;Acc:ZDB-GENE-140106-7]	protein_coding	ENSDART00000167564,ENSDART00000170575,ENSDART00000183342
ENSDARG00000043644		8.14846		9.60712	246	9.71107	208	9.78021	195		6.54842	141	7.31269	140	5.93128	112		9.69947	6.59746	1.47446	0.560185	0.0050837	0.202388	5	2002804	2047801	1	vkorc1l1	vitamin K epoxide reductase complex, subunit 1-like 1 [Source:NCBI gene;Acc:553717]	protein_coding	ENSDART00000064088,ENSDART00000137721
ENSDARG00000018809		5.13312		6.83996	175	6.21788	133	6.47845	129		4.51216	97	3.9296	75	2.82065	53		6.5121	3.75414	1.75793	0.81388	0.00511063	0.202388	2	11848510	11912347	-1	abhd3	abhydrolase domain containing 3 [Source:ZFIN;Acc:ZDB-GENE-040912-90]	protein_coding	ENSDART00000023851
ENSDARG00000010252		10.4082		11.3999	292	11.9467	256	13.7823	275		7.98305	172	8.77002	168	8.5674	162		12.3763	8.44016	1.45899	0.544973	0.00511972	0.202388	8	13389115	13412597	1	jak3	Janus kinase 3 (a protein tyrosine kinase, leukocyte) [Source:ZFIN;Acc:ZDB-GENE-070725-4]	protein_coding	ENSDART00000049469,ENSDART00000138151,ENSDART00000154266,ENSDART00000184428
ENSDARG00000043371		1664.14		1489.1	38207	1450.54	31143	1286.06	25707		2089.92	45159	1844.49	35438	1824.75	34610		1408.57	1919.72	-1.36304	-0.446825	0.0051237	0.202388	10	33382858	33394568	1	mdh2	malate dehydrogenase 2, NAD (mitochondrial) [Source:ZFIN;Acc:ZDB-GENE-040426-2143]	protein_coding	ENSDART00000063662
ENSDARG00000010317		8.51588		9.80199	251	11.3412	243	11.6812	233		5.25262	113	8.45774	162	4.56049	86		10.9415	6.09028	1.85309	0.889937	0.00513295	0.202388	9	31105389	31108285	-1	gpr183a	G protein-coupled receptor 183a [Source:NCBI gene;Acc:556770]	protein_coding	ENSDART00000003193
ENSDARG00000015065		284.109		219.639	5635	250.369	5375	248.758	4972		296.345	6403	334.588	6428	354.954	6732		239.588	328.629	-1.37025	-0.454437	0.00517761	0.203597	15	32351886	32383529	-1	c4	complement component 4 [Source:ZFIN;Acc:ZDB-GENE-030131-5697]	protein_coding	ENSDART00000028349,ENSDART00000155371,ENSDART00000185632
ENSDARG00000017049		214.259		198.593	5095	183.206	3933	160.961	3217		245.762	5310	234.657	4508	262.373	4976		180.92	247.597	-1.37233	-0.456629	0.00518878	0.203597	3	24207243	24218622	1	adsl	adenylosuccinate lyase [Source:ZFIN;Acc:ZDB-GENE-030131-6363]	protein_coding	ENSDART00000023454,ENSDART00000136400
ENSDARG00000111983		2.92027		1.89024	48	2.30551	49	2.17616	43		3.44775	74	3.7214	71	3.98054	75		2.12397	3.71657	-1.75926	-0.814968	0.00521711	0.203966	25	16043246	16045771	1	sb:cb470	sb:cb470 [Source:ZFIN;Acc:ZDB-GENE-030131-9856]	protein_coding	ENSDART00000186663
ENSDARG00000005368		509.595		474.451	12173	424.469	9113	409.894	8193		551.988	11927	588.008	11297	608.76	11546		436.271	582.918	-1.33793	-0.420003	0.00522344	0.203966	15	23271862	23342752	-1	mcamb	melanoma cell adhesion molecule b [Source:ZFIN;Acc:ZDB-GENE-030219-213]	protein_coding	ENSDART00000020425
ENSDARG00000104414		6.55226		8.32097	213	6.86994	147	9.88027	197		4.28077	92	4.29393	82	5.66766	107		8.35706	4.74745	1.75825	0.814144	0.00523998	0.20402	6	59176470	59230818	1	shmt2	serine hydroxymethyltransferase 2 (mitochondrial) [Source:ZFIN;Acc:ZDB-GENE-071213-1]	protein_coding	ENSDART00000161720
ENSDARG00000040536		4.54112		10.3866	266	5.47267	117	4.92763	98		1.22638	26	2.99274	57	2.2407	42		6.92896	2.15327	3.38097	1.75744	0.00527588	0.20402	15	41711727	41714329	-1	ftr90	finTRIM family, member 90 [Source:ZFIN;Acc:ZDB-GENE-131122-80]	protein_coding	ENSDART00000154113
ENSDARG00000045864		353.071		307.915	7900	285.766	6135	224.195	4481		403.017	8708	521.491	10019	376.043	7132		272.625	433.517	-1.58873	-0.66787	0.0052826	0.20402	4	4115778	4119425	-1	lmod2b	leiomodin 2 (cardiac) b [Source:ZFIN;Acc:ZDB-GENE-041210-356]	protein_coding	ENSDART00000067409,ENSDART00000138221
ENSDARG00000101534		4.29104		5.1251	131	5.28636	113	6.12827	122		3.86426	83	2.7325	52	2.60976	49		5.51324	3.06884	1.79543	0.844326	0.00528652	0.20402	3	14512670	14537576	1	rab3db	RAB3D, member RAS oncogene family, b [Source:ZFIN;Acc:ZDB-GENE-040718-428]	protein_coding	ENSDART00000161403
ENSDARG00000018004		124.461		110.628	2838	112.271	2410	96.7766	1934		143.718	3105	134.986	2593	148.387	2814		106.559	142.364	-1.33802	-0.420096	0.00528792	0.20402	14	24241241	24244034	1	nkx2.5	NK2 homeobox 5 [Source:ZFIN;Acc:ZDB-GENE-980526-321]	protein_coding	ENSDART00000022377
ENSDARG00000057787		11.465		12.6081	323	15.7194	337	14.4327	288		7.98305	172	11.0081	211	7.03845	133		14.2534	8.67652	1.66212	0.733023	0.00532333	0.204578	15	17177635	17190540	-1	itgae.2	integrin, alpha E, tandem duplicate 2 [Source:ZFIN;Acc:ZDB-GENE-130530-671]	protein_coding	ENSDART00000154801
ENSDARG00000062518		50.4607		45.5802	1169	44.1772	948	32.2922	645		58.3804	1261	63.6803	1223	58.6537	1112		40.6832	60.2381	-1.49561	-0.580732	0.00537531	0.204578	8	43736072	43775820	-1	ulk1a	unc-51 like autophagy activating kinase 1a [Source:ZFIN;Acc:ZDB-GENE-080723-31]	protein_coding	ENSDART00000090534,ENSDART00000138671,ENSDART00000142243,ENSDART00000144239
ENSDARG00000040988		513.894		454.38	11658	387.302	8315	423.051	8456		570.36	12324	543.872	10449	704.398	13360		421.577	606.21	-1.43197	-0.518006	0.00537588	0.204578	16	12236339	12254994	1	tpi1b	triosephosphate isomerase 1b [Source:NCBI gene;Acc:560753]	protein_coding	ENSDART00000060056,ENSDART00000132468,ENSDART00000142808,ENSDART00000144649
ENSDARG00000061421		34.538		26.8337	688	22.7989	489	31.9921	639		40.6094	877	48.3783	929	36.6157	694		27.2082	41.8678	-1.54492	-0.627534	0.00537594	0.204578	25	24721849	25058508	-1		BR serine/threonine kinase 2a [Source:NCBI gene;Acc:100334759]	protein_coding	ENSDART00000087570,ENSDART00000178891
ENSDARG00000045518		8.46432		10.1917	261	9.80422	210	10.2305	204		5.94679	128	7.46883	143	7.14389	135		10.0755	6.85317	1.48359	0.569092	0.00538412	0.204578	4	25251855	25271455	-1	tmem110l	transmembrane protein 110, like [Source:ZFIN;Acc:ZDB-GENE-040426-912]	protein_coding	ENSDART00000066936,ENSDART00000142819,ENSDART00000146792
ENSDARG00000073909		120.247		109.537	2810	98.5778	2116	71.5131	1429		154.038	3328	129.937	2496	157.877	2994		93.2092	147.284	-1.59988	-0.677963	0.00538754	0.204578	25	19238175	19347077	1	ppip5k1b	diphosphoinositol pentakisphosphate kinase 1b [Source:ZFIN;Acc:ZDB-GENE-100426-5]	protein_coding	ENSDART00000110730,ENSDART00000154420,ENSDART00000193619
ENSDARG00000051957		8.37397		8.98353	230	10.5494	226	12.0814	241		6.59469	142	7.05245	135	4.98227	94		10.5381	6.20981	1.68484	0.752607	0.00540041	0.204578	5	69278089	69287567	1	selenom	selenoprotein M [Source:NCBI gene;Acc:352913]	protein_coding	ENSDART00000136656
ENSDARG00000045066		119.246		122.242	3136	142.266	3054	155.208	3102		109.379	2363	92.9831	1786	93.3978	1771		139.905	98.5868	1.41663	0.502468	0.0054036	0.204578	12	30740797	30777743	-1	entpd1	ectonucleoside triphosphate diphosphohydrolase 1 [Source:ZFIN;Acc:ZDB-GENE-040801-58]	protein_coding	ENSDART00000066257,ENSDART00000126466,ENSDART00000148888
ENSDARG00000023214		16.8283		14.5179	372	15.3002	328	12.9819	259		19.5064	421	18.9714	364	19.6918	373		14.2667	19.3899	-1.35982	-0.443415	0.00551065	0.207741	25	22863028	22889519	-1	mob2a	MOB kinase activator 2a [Source:ZFIN;Acc:ZDB-GENE-040718-56]	protein_coding	ENSDART00000128250
ENSDARG00000023290		640.909		617.798	15851	470.999	10112	508.096	10156		702.069	15170	769.602	14786	776.892	14735		532.298	749.521	-1.41634	-0.502168	0.00551286	0.207741	19	42955280	42993306	1	fabp3	fatty acid binding protein 3, muscle and heart [Source:ZFIN;Acc:ZDB-GENE-020318-2]	protein_coding	ENSDART00000033724,ENSDART00000141225
ENSDARG00000070830		1.48702		2.27999	58	1.88632	40	2.17616	43		0.485925	10	1.17107	22	0.922643	17		2.11416	0.85988	2.65863	1.41069	0.00556001	0.209031	25	20027175	20049449	-1	zgc:136858	zgc:136858 [Source:ZFIN;Acc:ZDB-GENE-060421-6632]	protein_coding	ENSDART00000104315
ENSDARG00000008030		924.428		835.04	21425	776.862	16679	753.277	15057		1162.22	25113	1028.33	19757	990.839	18793		788.393	1060.46	-1.34321	-0.425688	0.00558269	0.209396	6	1787160	1799561	1	myl9b	myosin, light chain 9b, regulatory [Source:ZFIN;Acc:ZDB-GENE-040426-2296]	protein_coding	ENSDART00000113505
ENSDARG00000045634		45.7383		25.6645	658	45.1553	969	21.2363	424		69.7186	1506	49.7835	956	62.8715	1192		30.6854	60.7912	-2.06897	-1.04891	0.00560061	0.209582	25	27816115	27819838	-1	lmod2a	leiomodin 2 (cardiac) a [Source:ZFIN;Acc:ZDB-GENE-040912-41]	protein_coding	ENSDART00000067106
ENSDARG00000043518		3.56335		2.16306	55	2.91099	62	2.87653	57		4.4196	95	4.50212	86	4.50777	85		2.6502	4.4765	-1.72281	-0.784766	0.0056505	0.210961	20	15083987	15090862	-1	si:dkey-239i20.2	si:dkey-239i20.2 [Source:ZFIN;Acc:ZDB-GENE-041001-98]	protein_coding	ENSDART00000063892,ENSDART00000122592,ENSDART00000164552
ENSDARG00000039929		311.372		297.353	7629	256.703	5511	231.899	4635		352.712	7621	350.254	6729	379.312	7194		261.985	360.759	-1.3837	-0.468534	0.00568341	0.211122	5	51594209	51609006	1	ckmt2b	creatine kinase, mitochondrial 2b (sarcomeric) [Source:ZFIN;Acc:ZDB-GENE-040426-1654]	protein_coding	ENSDART00000048210,ENSDART00000055857,ENSDART00000058403,ENSDART00000164668,ENSDART00000184797
ENSDARG00000025074		33.0745		24.6122	631	28.4346	610	29.2406	584		36.9534	798	35.2623	677	43.9442	833		27.4291	38.72	-1.41112	-0.496837	0.00569921	0.211122	1	56421754	56435182	-1	slc25a10	solute carrier family 25 member 10 [Source:ZFIN;Acc:ZDB-GENE-040426-1095]	protein_coding	ENSDART00000037576
ENSDARG00000032389		32.8424		29.0942	746	28.8072	618	26.9894	539		34.7321	750	37.9687	729	39.4628	748		28.2969	37.3878	-1.31891	-0.399343	0.0057033	0.211122	4	10574822	10599062	-1	tspan12	tetraspanin 12 [Source:ZFIN;Acc:ZDB-GENE-040426-1285]	protein_coding	ENSDART00000048003
ENSDARG00000004105		176.648		212.545	5453	224.286	4815	179.521	3588		148.438	3207	137.432	2640	157.666	2990		205.451	147.846	1.38558	0.470495	0.00571579	0.211122	6	33979523	34008901	-1	tie1	tyrosine kinase with immunoglobulin-like and EGF-like domains 1 [Source:NCBI gene;Acc:30746]	protein_coding	ENSDART00000003701,ENSDART00000184003,ENSDART00000190702,ENSDART00000191183,ENSDART00000192502
ENSDARG00000056407		34.1805		34.4726	884	42.4539	911	42.1975	843		30.0116	648	27.7674	533	28.1801	534		39.708	28.6531	1.37886	0.463474	0.0057283	0.211122	18	30567945	30573849	1	irf8	interferon regulatory factor 8 [Source:ZFIN;Acc:ZDB-GENE-040718-367]	protein_coding	ENSDART00000078894
ENSDARG00000020871		26.5914		20.2471	519	22.4263	481	16.834	336		39.0822	844	35.6786	685	25.2804	479		19.8358	33.3471	-1.66368	-0.734377	0.00574798	0.211122	4	4834085	4926061	1	ptprz1b	protein tyrosine phosphatase receptor type Z1b [Source:ZFIN;Acc:ZDB-GENE-050506-100]	protein_coding	ENSDART00000127751,ENSDART00000130818,ENSDART00000133866,ENSDART00000150309,ENSDART00000175651
ENSDARG00000071212		24.4831		28.8993	741	29.8784	641	30.5913	611		15.5727	336	17.0456	327	24.9114	472		29.7897	19.1766	1.59178	0.670638	0.00576197	0.211122	11	39075613	39105253	-1	p3h1	prolyl 3-hydroxylase 1 [Source:ZFIN;Acc:ZDB-GENE-031010-35]	protein_coding	ENSDART00000102827
ENSDARG00000068858		7.68118		8.67174	222	9.99052	214	9.48005	189		7.10376	153	5.59512	107	5.24588	99		9.38077	5.98159	1.56472	0.645907	0.00576847	0.211122	10	33544329	33557299	-1	il2rga	interleukin 2 receptor, gamma a [Source:ZFIN;Acc:ZDB-GENE-080402-1]	protein_coding	ENSDART00000099732
ENSDARG00000069440		38.1522		31.8224	816	29.2729	628	27.1395	542		52.7807	1140	52.1257	1001	35.7722	678		29.4116	46.8929	-1.57178	-0.652401	0.00577235	0.211122	9	30820290	31062704	1	dachd	dachshund d [Source:ZFIN;Acc:ZDB-GENE-070427-2]	protein_coding	ENSDART00000101070,ENSDART00000140370
ENSDARG00000027797		47.7876		39.1105	1003	39.0073	837	36.0942	721		48.1066	1039	54.2596	1042	70.1472	1330		38.0707	57.5045	-1.49203	-0.577273	0.00580341	0.211779	23	26797035	26888217	-1	adcy6b	adenylate cyclase 6b [Source:ZFIN;Acc:ZDB-GENE-090127-2]	protein_coding	ENSDART00000038491,ENSDART00000134406,ENSDART00000145332
ENSDARG00000100217		0.870907		1.03281	26	2.02605	43	1.07557	21		0.254532	5	0.5465	10	0.289973	5		1.37815	0.363669	3.81827	1.93292	0.00582626	0.212133	22	24306145	24307598	-1	si:ch211-117l17.7	si:ch211-117l17.7 [Source:ZFIN;Acc:ZDB-GENE-110914-232]	protein_coding	ENSDART00000166070
ENSDARG00000020606		7.40777		11.6727	299	8.36037	179	8.82971	176		5.02122	108	6.74017	129	3.82238	72		9.62094	5.19459	1.89826	0.924675	0.0058541	0.212668	23	36311581	36316352	-1	nfe2	nuclear factor, erythroid 2 [Source:ZFIN;Acc:ZDB-GENE-030124-1]	protein_coding	ENSDART00000014840,ENSDART00000125860
ENSDARG00000042737		9.31927		7.77534	199	7.28912	156	7.52901	150		11.5465	249	12.1011	232	9.67457	183		7.53116	11.1074	-1.46879	-0.554628	0.00586834	0.212707	8	28467893	28477739	1	slc52a3	solute carrier family 52 member 3 [Source:NCBI gene;Acc:678609]	protein_coding	ENSDART00000062716,ENSDART00000189724
ENSDARG00000040695		12.2395		13.4266	344	15.9057	341	15.6834	313		7.6591	165	8.92617	171	11.8362	224		15.0052	9.47382	1.60994	0.68701	0.0058946	0.212827	16	20294976	20305104	1	fkbp14	FKBP prolyl isomerase 14 [Source:ZFIN;Acc:ZDB-GENE-040801-210]	protein_coding	ENSDART00000059619,ENSDART00000137265
ENSDARG00000016687		2102.41		1974.41	50659	1737.07	37295	1483.72	29658		2626.98	56764	2542.4	48847	2249.9	42674		1731.73	2473.09	-1.43482	-0.520868	0.00589798	0.212827	7	20298333	20333524	1	acadvl	acyl-CoA dehydrogenase very long chain [Source:ZFIN;Acc:ZDB-GENE-030131-899]	protein_coding	ENSDART00000023089,ENSDART00000131019
ENSDARG00000012388		393.454		234.955	6028	260.382	5590	288.279	5762		348.13	7522	498.902	9585	730.074	13847		261.206	525.702	-1.9304	-0.948902	0.00595736	0.213658	24	28231602	28245872	-1	cox4i1l	cytochrome c oxidase subunit 4I1, like [Source:ZFIN;Acc:ZDB-GENE-130814-2]	protein_coding	ENSDART00000105691,ENSDART00000167861
ENSDARG00000102071		3.88428		2.24101	57	3.4699	74	2.87653	57		4.97495	107	4.86645	93	4.87683	92		2.86248	4.90607	-1.7619	-0.81713	0.00595868	0.213658	17	729423	730986	1	slc25a47b		protein_coding	ENSDART00000164795
ENSDARG00000060526		7.33242		12.4912	320	8.96586	192	7.92923	158		5.90052	127	3.40912	65	5.29861	100		9.79543	4.86941	2.04212	1.03007	0.00597174	0.213658	5	39667272	39673477	1	bmp3	bone morphogenetic protein 3 [Source:ZFIN;Acc:ZDB-GENE-030131-7192]	protein_coding	ENSDART00000085388
ENSDARG00000044295		27.2946		25.7424	660	22.3331	479	20.0857	401		30.5207	659	30.5259	586	34.5596	655		22.7204	31.8687	-1.40263	-0.488138	0.00598431	0.213658	10	15881309	15919839	-1	pip5k1ba	phosphatidylinositol-4-phosphate 5-kinase, type I, beta a [Source:ZFIN;Acc:ZDB-GENE-041010-81]	protein_coding	ENSDART00000065032,ENSDART00000148169
ENSDARG00000099109		22.9983		18.6491	478	14.4618	310	21.0362	420		24.8284	536	27.0908	520	31.9234	605		18.049	27.9476	-1.55742	-0.639159	0.00598708	0.213658	7	72644051	72741530	-1			processed_transcript	ENSDART00000158727,ENSDART00000160523,ENSDART00000184302,ENSDART00000192965
ENSDARG00000099617		27.4036		26.0932	669	22.7057	487	20.586	411		32.6032	704	31.7751	610	30.6581	581		23.1283	31.6788	-1.37219	-0.456481	0.00601247	0.213703	2	37815687	37824427	1	sdr39u1	short chain dehydrogenase/reductase family 39U, member 1 [Source:ZFIN;Acc:ZDB-GENE-060929-104]	protein_coding	ENSDART00000166352
ENSDARG00000012593		836.413		954.418	24488	1135.54	24380	952.633	19042		517.926	11191	677.27	13012	780.688	14807		1014.2	658.628	1.55616	0.637994	0.00604818	0.213703	21	6556635	6725780	1	col5a1	procollagen, type V, alpha 1 [Source:ZFIN;Acc:ZDB-GENE-041105-6]	protein_coding	ENSDART00000139598,ENSDART00000159645
ENSDARG00000100443		16.9766		13.9722	358	14.9276	320	11.9814	239		18.2569	394	19.0755	366	23.646	448		13.6271	20.3261	-1.48171	-0.567264	0.0060684	0.213703	13	2352289	2352995	1			lincRNA	ENSDART00000169935
ENSDARG00000015552		122.178		100.846	2587	100.86	2165	98.3775	1966		169.68	3666	141.544	2719	121.762	2309		100.028	144.329	-1.42963	-0.515642	0.00607007	0.213703	19	15142527	15229421	-1	phactr4a	phosphatase and actin regulator 4a [Source:NCBI gene;Acc:569383]	protein_coding	ENSDART00000048151,ENSDART00000055619,ENSDART00000151337,ENSDART00000151451,ENSDART00000169883
ENSDARG00000091590		0.939621		1.07179	27	1.32741	28	2.37627	47		0.809875	17	0.0260238	0	0.0263612	0		1.59182	0.28742	17.8289	4.15614	0.00608255	0.213703	2	45918939	45921203	1	si:ch211-170p16.1	si:ch211-170p16.1 [Source:ZFIN;Acc:ZDB-GENE-070912-152]	protein_coding	ENSDART00000142359
ENSDARG00000098075		86.9423		97.143	2492	96.6682	2075	109.183	2182		82.3064	1778	64.0966	1231	72.2561	1370		100.998	72.8864	1.39084	0.475958	0.00608618	0.213703	19	13939750	13950231	-1	sh3bgrl3	SH3 domain binding glutamate-rich protein like 3 [Source:ZFIN;Acc:ZDB-GENE-040426-1059]	protein_coding	ENSDART00000168665
ENSDARG00000070448		87.0726		64.3658	1651	79.8078	1713	77.2662	1544		96.6065	2087	98.8124	1898	105.577	2002		73.8132	100.332	-1.36416	-0.448017	0.00611	0.213703	1	11902579	11973341	-1	grk4	G protein-coupled receptor kinase 4 [Source:ZFIN;Acc:ZDB-GENE-060929-1198]	protein_coding	ENSDART00000066638,ENSDART00000159981,ENSDART00000165543,ENSDART00000170032
ENSDARG00000002084		290.322		259.431	6656	259.032	5561	241.354	4824		324.714	7016	316.58	6082	340.824	6464		253.272	327.372	-1.29277	-0.37047	0.00611723	0.213703	23	20180159	20258490	-1	lamb2	laminin, beta 2 (laminin S) [Source:ZFIN;Acc:ZDB-GENE-081030-4]	protein_coding	ENSDART00000147326
ENSDARG00000003931		78.7062		82.6056	2119	96.0627	2062	105.131	2101		53.2435	1150	59.9328	1151	75.2613	1427		94.5998	62.8125	1.5148	0.599123	0.00612829	0.213703	19	20801060	20823099	1	cndp2	carnosine dipeptidase 2 [Source:ZFIN;Acc:ZDB-GENE-030131-5499]	protein_coding	ENSDART00000038202,ENSDART00000143457
ENSDARG00000104937		25.753		19.7404	506	24.8948	534	16.884	337		33.6214	726	31.6189	607	27.7584	526		20.5064	30.9996	-1.52587	-0.609629	0.00613255	0.213703	KN150000.1	7817	69238	1		protein tyrosine phosphatase, receptor type D [Source:NCBI gene;Acc:100330629]	protein_coding	ENSDART00000162072,ENSDART00000182151,ENSDART00000182980,ENSDART00000184604,ENSDART00000187727,ENSDART00000193746
ENSDARG00000000183		17.2267		14.9076	382	12.8317	275	13.0319	260		17.5627	379	20.2205	388	24.8059	470		13.5904	20.863	-1.51381	-0.598183	0.00613376	0.213703	22	11778053	11833334	-1	ptpn4b	protein tyrosine phosphatase non-receptor type 4b [Source:ZFIN;Acc:ZDB-GENE-030131-6259]	protein_coding	ENSDART00000000192,ENSDART00000125423,ENSDART00000126784
ENSDARG00000079198		161.24		144.847	3716	145.387	3121	125.142	2501		173.707	3753	189.688	3644	188.667	3578		138.459	184.02	-1.33128	-0.412815	0.00617739	0.213992	6	29410986	29469208	1	usp13	ubiquitin specific peptidase 13 [Source:NCBI gene;Acc:558011]	protein_coding	ENSDART00000065293
ENSDARG00000021346		324.212		290.766	7460	287.303	6168	256.062	5118		390.013	8427	342.135	6573	378.995	7188		278.044	370.381	-1.33224	-0.413859	0.00617952	0.213992	22	10201826	10212502	1	pdhb	pyruvate dehydrogenase E1 beta subunit [Source:ZFIN;Acc:ZDB-GENE-040426-2173]	protein_coding	ENSDART00000006513,ENSDART00000132641
ENSDARG00000095962		1.55363		2.59178	66	2.07263	44	1.92603	38		0.532203	11	1.17107	22	1.02809	19		2.19681	0.910454	2.59059	1.37328	0.00621163	0.213992	23	44901398	44916800	-1	fhdc5	FH2 domain containing 5 [Source:ZFIN;Acc:ZDB-GENE-110411-151]	protein_coding	ENSDART00000149103,ENSDART00000149228,ENSDART00000150076
ENSDARG00000029402		18.0777		12.1015	310	15.6728	336	13.8324	276		26.8647	580	17.9304	344	22.0643	418		13.8689	22.2865	-1.60495	-0.682528	0.00621202	0.213992	11	36280523	36341189	-1	sort1a	sortilin 1a [Source:NCBI gene;Acc:406511]	protein_coding	ENSDART00000134481,ENSDART00000146093,ENSDART00000159752
ENSDARG00000012824		39.3391		33.927	870	36.399	781	25.8888	517		43.7101	944	49.0549	942	47.0548	892		32.0716	46.6066	-1.46466	-0.550565	0.00623145	0.213992	12	5587347	5663189	-1	itga3b	integrin, alpha 3b [Source:ZFIN;Acc:ZDB-GENE-050411-55]	protein_coding	ENSDART00000105884
ENSDARG00000092123		60.5135		53.6089	1375	51.2567	1100	48.4508	968		78.7892	1702	68.1564	1309	62.8188	1191		51.1055	69.9215	-1.36317	-0.446965	0.00624065	0.213992	8	26382604	26388090	-1	si:dkey-20d21.12	si:dkey-20d21.12 [Source:ZFIN;Acc:ZDB-GENE-081104-365]	protein_coding	ENSDART00000145688,ENSDART00000147912
ENSDARG00000008182		2.4195		2.63075	67	3.42333	73	4.02715	80		1.08755	23	2.00383	38	1.34442	25		3.36041	1.4786	2.29862	1.20077	0.00626116	0.213992	10	22110842	22117121	-1	si:ch73-111e15.1	si:ch73-111e15.1 [Source:ZFIN;Acc:ZDB-GENE-110411-28]	protein_coding	ENSDART00000149470
ENSDARG00000035879		13.7176		15.9989	410	15.7194	337	15.7334	314		10.7135	231	12.6736	243	11.4671	217		15.8172	11.6181	1.36784	0.451895	0.00628843	0.213992	19	32488572	32493866	-1	fuca1.2	alpha-L-fucosidase 1, tandem duplicate 2 [Source:ZFIN;Acc:ZDB-GENE-040801-78]	protein_coding	ENSDART00000052090
ENSDARG00000035944		58.5892		48.2305	1237	53.2595	1143	51.3524	1026		62.5918	1352	67.2195	1291	68.8819	1306		50.9475	66.231	-1.30007	-0.378591	0.0063	0.213992	19	30990129	30997794	1	sync	syncoilin, intermediate filament protein [Source:ZFIN;Acc:ZDB-GENE-060503-747]	protein_coding	ENSDART00000052169,ENSDART00000134645,ENSDART00000193376
ENSDARG00000035918		253.771		201.788	5177	233.834	5020	177.87	3555		292.874	6328	265.105	5093	351.158	6660		204.497	303.045	-1.48114	-0.566705	0.00634034	0.213992	19	31007901	31042709	-1	bzw2	basic leucine zipper and W2 domains 2 [Source:NCBI gene;Acc:393892]	protein_coding	ENSDART00000133101,ENSDART00000136213,ENSDART00000144337,ENSDART00000147504,ENSDART00000161882,ENSDART00000190949
ENSDARG00000076819		5.09477		3.83895	98	4.448	95	3.32677	66		6.54842	141	6.84426	131	5.56222	105		3.87124	6.3183	-1.63585	-0.710041	0.00634078	0.213992	15	41422248	41438821	-1	nlrc8	NLR family CARD domain containing 8 [Source:ZFIN;Acc:ZDB-GENE-070912-363]	protein_coding	ENSDART00000136952
ENSDARG00000079553		4.88549		6.29432	161	5.10006	109	7.52901	150		3.58659	77	3.9296	75	2.87337	54		6.3078	3.46319	1.80543	0.852345	0.00634175	0.213992	16	38394371	38397359	1	cd83	CD83 molecule [Source:ZFIN;Acc:ZDB-GENE-060503-762]	protein_coding	ENSDART00000137623,ENSDART00000137954
ENSDARG00000014488		2.26118		3.60511	92	2.1192	45	4.07717	81		1.04127	22	1.32721	25	1.39714	26		3.26716	1.25521	2.5457	1.34806	0.00635218	0.213992	24	32650227	32665283	-1	ca2	carbonic anhydrase II [Source:ZFIN;Acc:ZDB-GENE-031219-5]	protein_coding	ENSDART00000038364
ENSDARG00000079281		8.06068		9.37328	240	11.3412	243	9.02981	180		6.27074	135	7.2086	138	5.14044	97		9.91477	6.20659	1.60172	0.679621	0.00636007	0.213992	7	24528414	24572034	1	si:dkeyp-75h12.2	si:dkeyp-75h12.2 [Source:ZFIN;Acc:ZDB-GENE-030131-7512]	protein_coding	ENSDART00000133022,ENSDART00000136473,ENSDART00000180552
ENSDARG00000058853		6.97441		8.59379	220	8.03434	172	8.72965	174		4.60472	99	6.47993	124	5.40405	102		8.4526	5.49623	1.5602	0.641728	0.00638347	0.213992	17	6985428	7060477	-1	sash1b	SAM and SH3 domain containing 1b [Source:ZFIN;Acc:ZDB-GENE-110228-1]	protein_coding	ENSDART00000081797,ENSDART00000187895,ENSDART00000188305
ENSDARG00000033355		6.7862		17.7137	454	6.1713	132	9.48005	189		1.13382	24	4.29393	82	1.92437	36		11.1217	2.45071	5.00732	2.32404	0.00638462	0.213992	5	1877464	1901838	1	zgc:101699	zgc:101699 [Source:NCBI gene;Acc:492789]	protein_coding	ENSDART00000050658
ENSDARG00000079463		18.1113		20.7537	532	20.9824	450	20.7861	415		13.6753	295	16.7854	322	15.6849	297		20.8407	15.3819	1.3629	0.446681	0.00641225	0.213992	7	19509888	19526721	-1	man2b2	mannosidase, alpha, class 2B, member 2 [Source:ZFIN;Acc:ZDB-GENE-140106-166]	protein_coding	ENSDART00000114203
ENSDARG00000061890		21.7147		26.4829	679	27.0839	581	24.1879	483		14.3695	310	16.7854	322	21.379	405		25.9182	17.5113	1.50522	0.589972	0.00641462	0.213992	23	24511417	24542952	-1	atp13a2	ATPase cation transporting 13A2 [Source:ZFIN;Acc:ZDB-GENE-061215-126]	protein_coding	ENSDART00000088777,ENSDART00000132265
ENSDARG00000036942		21.6697		24.6901	633	23.777	510	25.3385	506		17.609	380	19.4918	374	19.1119	362		24.6019	18.7376	1.31498	0.395043	0.00642373	0.213992	19	317629	325584	-1	gpd1c	glycerol-3-phosphate dehydrogenase 1c [Source:ZFIN;Acc:ZDB-GENE-040426-2576]	protein_coding	ENSDART00000133451,ENSDART00000134266,ENSDART00000147635
ENSDARG00000078475		9.82378		7.65841	196	8.59325	184	6.02821	120		11.1763	241	14.5994	280	10.8872	206		7.42663	12.2209	-1.63696	-0.711015	0.00642414	0.213992	9	48134394	48184823	-1	klhl23	kelch-like family member 23 [Source:ZFIN;Acc:ZDB-GENE-081104-458]	protein_coding	ENSDART00000114463,ENSDART00000180264
ENSDARG00000002071		39.5727		32.9526	845	38.1224	818	29.7909	595		45.0522	973	45.3595	871	46.1585	875		33.622	45.5234	-1.36036	-0.443986	0.00644317	0.213992	13	11489953	11536951	-1	adss2	adenylosuccinate synthase 2 [Source:NCBI gene;Acc:550502]	protein_coding	ENSDART00000018155
ENSDARG00000061591		44.2012		41.2931	1059	31.3689	673	37.6951	753		47.4587	1025	53.1666	1021	54.225	1028		36.7857	51.6168	-1.40901	-0.494679	0.00645255	0.213992	13	24263049	24277532	1	abcb10	ATP-binding cassette, sub-family B (MDR/TAP), member 10 [Source:ZFIN;Acc:ZDB-GENE-040525-2]	protein_coding	ENSDART00000088005,ENSDART00000135992
ENSDARG00000021193		208.97		195.903	5026	169.466	3638	170.166	3401		237.478	5131	257.922	4955	222.884	4227		178.512	239.428	-1.34204	-0.424424	0.00646812	0.213992	5	31880586	31904562	-1	coro1cb	coronin, actin binding protein, 1Cb [Source:ZFIN;Acc:ZDB-GENE-030131-418]	protein_coding	ENSDART00000140640,ENSDART00000141446,ENSDART00000147814,ENSDART00000191957
ENSDARG00000045589		1.29113		0.837944	21	0.628774	13	0.925493	18		2.10567	45	1.5354	29	1.71348	32		0.797404	1.78485	-2.25994	-1.17629	0.00646906	0.213992	4	14717502	14719854	1	kcnj8	potassium inwardly rectifying channel subfamily J member 8 [Source:ZFIN;Acc:ZDB-GENE-060308-1]	protein_coding	ENSDART00000067031
ENSDARG00000061093		35.8901		28.8993	741	33.9771	729	27.6898	553		38.1104	823	41.56	798	45.1041	855		30.1887	41.5915	-1.3794	-0.464037	0.00647297	0.213992	5	30427198	30491172	-1	phldb1a	pleckstrin homology-like domain, family B, member 1a [Source:ZFIN;Acc:ZDB-GENE-060526-272]	protein_coding	ENSDART00000086734,ENSDART00000138464,ENSDART00000183201,ENSDART00000187501,ENSDART00000189288
ENSDARG00000013477		13.5183		21.6501	555	12.5988	270	18.1847	363		8.35328	180	10.2794	197	10.0436	190		17.4779	9.55877	1.80793	0.854338	0.00648903	0.214085	11	25411914	25418856	-1	gata1a	GATA binding protein 1a [Source:ZFIN;Acc:ZDB-GENE-980526-268]	protein_coding	ENSDART00000013714,ENSDART00000143727
ENSDARG00000097938		7.81108		6.76201	173	6.63706	142	5.22779	104		9.74164	210	8.71798	167	9.78001	185		6.20895	9.41321	-1.51463	-0.598964	0.0065257	0.214505	14	36398282	36412506	-1	asb5a	ankyrin repeat and SOCS box containing 5a [Source:ZFIN;Acc:ZDB-GENE-070424-269]	protein_coding	ENSDART00000128244,ENSDART00000138376,ENSDART00000173140
ENSDARG00000092335		4.30171		5.94355	152	5.7987	124	4.52741	90		2.89241	62	3.66936	70	2.97882	56		5.42322	3.1802	1.72009	0.782485	0.00656406	0.214505	20	4906078	4907477	-1			processed_transcript	ENSDART00000135904
ENSDARG00000076371		9.71608		16.6614	427	8.73298	187	13.8824	277		6.13191	132	6.32379	121	6.56394	124		13.0923	6.33988	2.01225	1.00881	0.00657828	0.214505	11	44178560	44214767	-1		shroom family member 2b [Source:NCBI gene;Acc:556551]	protein_coding	ENSDART00000111271,ENSDART00000181342,ENSDART00000182954
ENSDARG00000029064		137.617		119.904	3076	115.531	2480	111.885	2236		165.932	3585	137.172	2635	175.276	3324		115.773	159.46	-1.37051	-0.454717	0.00658189	0.214505	14	38875078	38878419	-1	uqcrq	ubiquinol-cytochrome c reductase, complex III subunit VII [Source:ZFIN;Acc:ZDB-GENE-040718-199]	protein_coding	ENSDART00000039788,ENSDART00000173082,ENSDART00000173300
ENSDARG00000061335		69.8489		83.619	2145	76.6406	1645	80.4179	1607		52.503	1134	60.089	1154	65.824	1248		80.2258	59.472	1.35393	0.437158	0.00659347	0.214505	16	26863414	27100475	1	galnt1	UDP-N-acetyl-alpha-D-galactosamine:polypeptide N-acetylgalactosaminyltransferase 1 [Source:ZFIN;Acc:ZDB-GENE-030131-2360]	protein_coding	ENSDART00000087368,ENSDART00000140673
ENSDARG00000088357		140.301		126.49	3245	106.589	2288	120.189	2402		168.894	3649	143.261	2752	176.383	3345		117.756	162.846	-1.38103	-0.465749	0.00659438	0.214505	18	39487486	39505847	1	acadl	acyl-CoA dehydrogenase long chain [Source:ZFIN;Acc:ZDB-GENE-040426-771]	protein_coding	ENSDART00000126978
ENSDARG00000056499		269.88		215.351	5525	255.771	5491	197.33	3944		322.076	6959	282.072	5419	346.676	6575		222.818	316.941	-1.42566	-0.511634	0.00660055	0.214505	23	22634442	22650992	-1	ca6	carbonic anhydrase VI [Source:ZFIN;Acc:ZDB-GENE-030131-7091]	protein_coding	ENSDART00000079007,ENSDART00000132733,ENSDART00000139717,ENSDART00000141127
ENSDARG00000070140		2.56234		1.22768	31	1.23426	26	1.82597	36		2.84613	61	2.88864	55	5.35133	101		1.42931	3.69537	-2.52145	-1.33426	0.00661543	0.214505	3	39191815	39198113	-1	zgc:154169	zgc:154169 [Source:ZFIN;Acc:ZDB-GENE-061110-141]	protein_coding	ENSDART00000102690
ENSDARG00000020009		44.1598		47.6069	1221	49.8129	1069	51.1523	1022		38.8046	838	38.5413	740	39.041	740		49.524	38.7956	1.27591	0.351531	0.00662119	0.214505	5	39099172	39152767	1	bmp2k	BMP2 inducible kinase [Source:ZFIN;Acc:ZDB-GENE-041212-72]	protein_coding	ENSDART00000006079,ENSDART00000166657
ENSDARG00000033916		12.2748		16.8173	431	13.018	279	13.8824	277		10.3433	223	10.0712	193	9.5164	180		14.5726	9.97696	1.45805	0.544042	0.00668384	0.215762	20	38620666	38670696	1	si:ch211-243j20.2	si:ch211-243j20.2 [Source:ZFIN;Acc:ZDB-GENE-041014-345]	protein_coding	ENSDART00000045850,ENSDART00000144521,ENSDART00000153105
ENSDARG00000088881		11.7078		7.89226	202	10.9686	235	8.97979	179		15.5727	336	12.3613	237	14.4723	274		9.28022	14.1355	-1.54283	-0.625574	0.00668667	0.215762	16	13505064	13516745	-1	si:dkeyp-69b9.3	si:dkeyp-69b9.3 [Source:ZFIN;Acc:ZDB-GENE-100922-275]	protein_coding	ENSDART00000145410
ENSDARG00000030376		3.45762		6.91791	177	3.93566	84	3.82704	76		1.828	39	2.57636	49	1.66076	31		4.89354	2.02171	2.42772	1.2796	0.00677802	0.218274	1	45372562	45553602	-1	grin2bb	glutamate receptor, ionotropic, N-methyl D-aspartate 2B, genome duplicate b [Source:ZFIN;Acc:ZDB-GENE-061207-27]	protein_coding	ENSDART00000143664
ENSDARG00000097620		8.46359		6.25535	160	7.05624	151	7.32891	146		11.13	240	9.81098	188	9.20007	174		6.88017	10.047	-1.47146	-0.557247	0.00679851	0.21841	15	618081	637162	1	si:ch211-210b2.1	si:ch211-210b2.1 [Source:ZFIN;Acc:ZDB-GENE-131127-9]	protein_coding	ENSDART00000157207,ENSDART00000181518
ENSDARG00000035150		1.52336		2.43588	62	3.0973	66	1.52581	30		0.347089	7	0.442405	8	1.2917	24		2.353	0.693731	3.97657	1.99153	0.0068334	0.21841	5	61615663	61624693	-1	drll.2	draculin-like, tandem duplicate 2 [Source:ZFIN;Acc:ZDB-GENE-060531-125]	protein_coding	ENSDART00000141323
ENSDARG00000102366		11.2555		12.5692	322	12.7851	274	14.5327	290		8.53839	184	10.4876	201	8.62012	163		13.2957	9.21537	1.44483	0.530901	0.00683373	0.21841	3	43102010	43135493	1	micall2a	mical-like 2a [Source:ZFIN;Acc:ZDB-GENE-030131-5409]	protein_coding	ENSDART00000162096,ENSDART00000165708
ENSDARG00000003035		243.207		221.47	5682	190.193	4083	212.588	4249		299.723	6476	278.325	5347	256.943	4873		208.084	278.33	-1.33767	-0.419719	0.0068571	0.21841	14	12142813	12168897	1	hspa9	heat shock protein 9 [Source:ZFIN;Acc:ZDB-GENE-030828-12]	protein_coding	ENSDART00000012438,ENSDART00000136975
ENSDARG00000060594		303.561		253.702	6509	267.881	5751	250.559	5008		361.412	7809	305.441	5868	382.37	7252		257.381	349.741	-1.35331	-0.436497	0.00686066	0.21841	17	37227936	37252810	1	hadhab	hydroxyacyl-CoA dehydrogenase trifunctional multienzyme complex subunit alpha b [Source:ZFIN;Acc:ZDB-GENE-041111-204]	protein_coding	ENSDART00000076009,ENSDART00000128879
ENSDARG00000003216		2288.92		2575.66	66086	2521.87	54145	3434.91	68661		1748.57	37783	1345.93	25859	2106.6	39956		2844.15	1733.7	1.6512	0.723516	0.00687068	0.21841	25	34013093	34027440	1	anxa2a	annexin A2a [Source:ZFIN;Acc:ZDB-GENE-030131-4282]	protein_coding	ENSDART00000011967,ENSDART00000182856
ENSDARG00000092358		5.81408		7.93123	203	8.73298	187	6.32837	126		2.84613	61	5.80331	111	3.24243	61		7.66419	3.96396	2.04184	1.02987	0.0069083	0.21841	1	57927489	57931592	1			lincRNA	ENSDART00000132717,ENSDART00000141092
ENSDARG00000043395		68.0207		54.7781	1405	62.2952	1337	49.2012	983		89.9887	1944	83.8227	1610	68.0383	1290		55.4249	80.6166	-1.45113	-0.53718	0.00691847	0.21841	17	21964472	21982835	1	crip3	cysteine-rich protein 3 [Source:ZFIN;Acc:ZDB-GENE-130530-620]	protein_coding	ENSDART00000063704,ENSDART00000188904
ENSDARG00000034817		100.568		102.638	2633	119.816	2572	122.891	2456		91.0531	1967	82.5215	1585	84.4877	1602		115.115	86.0208	1.33544	0.417317	0.00691918	0.21841	1	16654254	16665044	-1	asah1b	N-acylsphingosine amidohydrolase (acid ceramidase) 1b [Source:ZFIN;Acc:ZDB-GENE-040426-1512]	protein_coding	ENSDART00000040434,ENSDART00000168555
ENSDARG00000102180		25.8884		23.287	597	22.1934	476	16.0335	320		29.6877	641	35.2102	676	28.9183	548		20.5047	31.2721	-1.53155	-0.61499	0.00697083	0.21841	21	5635420	5781802	1	shroom3	shroom family member 3 [Source:ZFIN;Acc:ZDB-GENE-120817-1]	protein_coding	ENSDART00000158385,ENSDART00000168158
ENSDARG00000062865		81.9759		93.4404	2397	93.175	2000	88.9224	1777		69.5335	1502	72.8406	1399	73.9432	1402		91.846	72.1058	1.27383	0.34917	0.00697928	0.21841	22	11857356	11874688	1	mras	muscle RAS oncogene homolog [Source:ZFIN;Acc:ZDB-GENE-050208-495]	protein_coding	ENSDART00000144677,ENSDART00000179540
ENSDARG00000062134		3.60213		2.63075	67	2.35208	50	3.07664	61		4.23449	91	5.07464	97	4.24416	80		2.68649	4.51776	-1.68844	-0.755693	0.0069889	0.21841	23	21067389	21114732	1	kcnab2b	potassium voltage-gated channel, shaker-related subfamily, beta member 2 b [Source:ZFIN;Acc:ZDB-GENE-080219-36]	protein_coding	ENSDART00000086117,ENSDART00000132066
ENSDARG00000091321		1.41607		1.92922	49	1.79317	38	2.12613	42		1.1801	25	0.650595	12	0.817198	15		1.94951	0.882632	2.24696	1.16797	0.006996	0.21841	14	146857	152309	1			protein_coding	ENSDART00000122521
ENSDARG00000022254		16.1058		19.6235	503	16.8372	361	19.9857	399		12.1018	261	13.2982	255	14.7886	280		18.8154	13.3962	1.40922	0.494894	0.00700523	0.21841	3	35005062	35266060	1	prkcbb	protein kinase C, beta b [Source:NCBI gene;Acc:393953]	protein_coding	ENSDART00000029451,ENSDART00000181163
ENSDARG00000012581		27.0017		24.7291	634	22.1468	475	20.3859	407		27.6052	596	34.4815	662	32.6616	619		22.4206	31.5828	-1.40201	-0.487495	0.00702765	0.21841	17	33206780	33231714	-1			antisense	ENSDART00000152068
ENSDARG00000012972		16.4278		19.1948	492	16.9303	363	25.4886	509		9.97303	215	13.2461	254	13.7342	260		20.5379	12.3178	1.66254	0.733391	0.00706711	0.21841	13	33606739	33609427	1	cfl1l	cofilin 1 (non-muscle), like [Source:ZFIN;Acc:ZDB-GENE-040426-2770]	protein_coding	ENSDART00000026464
ENSDARG00000069450		68.6087		61.6765	1582	56.5664	1214	49.2513	984		83.5559	1805	68.4166	1314	92.1852	1748		55.8314	81.3859	-1.45278	-0.538817	0.00708377	0.21841	1	47414734	47431453	-1	gja5b	gap junction protein, alpha 5b [Source:ZFIN;Acc:ZDB-GENE-050616-11]	protein_coding	ENSDART00000101104
ENSDARG00000018162		14.1742		11.7117	300	12.2727	263	10.4306	208		18.8122	406	14.235	273	17.5829	333		11.4717	16.8767	-1.46427	-0.550181	0.00708435	0.21841	19	34751687	34873566	-1	ctnnal1	catenin (cadherin-associated protein), alpha-like 1 [Source:ZFIN;Acc:ZDB-GENE-060503-507]	protein_coding	ENSDART00000016057
ENSDARG00000053358		23.1436		27.4962	705	34.9552	750	23.0373	460		19.0899	412	15.2239	292	19.0592	361		28.4962	17.791	1.5865	0.665845	0.00708902	0.21841	2	42724404	42748657	1	basp1	brain abundant, membrane attached signal protein 1 [Source:NCBI gene;Acc:569631]	protein_coding	ENSDART00000075392
ENSDARG00000075264		21.8113		18.2594	468	20.5167	440	17.6844	353		25.4301	549	24.5405	471	24.4369	463		18.8202	24.8025	-1.32083	-0.401448	0.00709307	0.21841	9	23859317	23885220	-1	si:dkeyp-74a11.1	si:dkeyp-74a11.1 [Source:ZFIN;Acc:ZDB-GENE-081104-474]	protein_coding	ENSDART00000112058,ENSDART00000141377
ENSDARG00000096046		454.175		385.435	9889	424.516	9114	366.12	7318		488.864	10563	546.786	10505	513.332	9736		392.024	516.327	-1.31828	-0.398652	0.00709829	0.21841	4	44858444	44861662	1			antisense	ENSDART00000150580
ENSDARG00000007918		10.2996		14.245	365	10.6892	229	13.5322	270		9.51024	205	7.52088	144	6.30033	119		12.8221	7.77715	1.6528	0.724915	0.00711471	0.21841	17	22760126	22947117	1	ttc27	tetratricopeptide repeat domain 27 [Source:ZFIN;Acc:ZDB-GENE-030102-1]	protein_coding	ENSDART00000136384,ENSDART00000151999,ENSDART00000190442
ENSDARG00000040741		2.22363		3.44921	88	2.53839	54	2.87653	57		1.1801	25	1.84769	35	1.44987	27		2.95471	1.49255	2.02646	1.01896	0.00711764	0.21841	2	44426609	44510752	1	kcnab1b	potassium voltage-gated channel, shaker-related subfamily, beta member 1 b [Source:ZFIN;Acc:ZDB-GENE-070912-690]	protein_coding	ENSDART00000112711,ENSDART00000154188
ENSDARG00000076290		53.9898		56.9607	1461	64.0185	1374	68.9618	1378		50.9296	1100	38.3331	736	44.735	848		63.3137	44.6659	1.42224	0.508165	0.0071212	0.21841	8	16582339	16592491	-1	calr	calreticulin [Source:ZFIN;Acc:ZDB-GENE-030131-4042]	protein_coding	ENSDART00000101655
ENSDARG00000035719		13.039		14.9466	383	17.629	378	17.7345	354		5.7154	123	11.2163	215	10.9926	208		16.77	9.3081	1.89758	0.924164	0.00712481	0.21841	3	16134376	16142057	-1	arl5c	ADP-ribosylation factor-like 5C [Source:ZFIN;Acc:ZDB-GENE-040426-1866]	protein_coding	ENSDART00000016616,ENSDART00000136560
ENSDARG00000102995		193.771		177.43	4552	175.475	3767	143.502	2868		227.621	4918	219.719	4221	218.877	4151		165.469	222.072	-1.34819	-0.431029	0.00715744	0.21841	19	46113828	46148977	1	rbm24a	RNA binding motif protein 24a [Source:NCBI gene;Acc:405801]	protein_coding	ENSDART00000159331,ENSDART00000161826
ENSDARG00000100876		1.82104		2.35793	60	2.58496	55	2.22619	44		1.08755	23	1.48336	28	1.18626	22		2.38969	1.25239	1.92954	0.948253	0.00717432	0.21841	10	36828069	36927594	-1	sez6a	seizure related 6 homolog a [Source:ZFIN;Acc:ZDB-GENE-030131-8208]	protein_coding	ENSDART00000162046
ENSDARG00000097385		4.81081		5.98253	153	5.42609	116	6.02821	120		3.72542	80	3.66936	70	4.03327	76		5.81228	3.80935	1.52782	0.611476	0.00718683	0.21841	17	24701071	24703778	-1	si:ch211-15d5.12	si:ch211-15d5.12 [Source:ZFIN;Acc:ZDB-GENE-131127-246]	protein_coding	ENSDART00000156061
ENSDARG00000075043		5.5164		6.41124	164	8.73298	187	6.47845	129		4.97495	107	2.8366	54	3.66421	69		7.20756	3.82525	1.89126	0.919345	0.00719166	0.21841	1	50847783	50859054	-1	si:dkeyp-123h10.2	si:dkeyp-123h10.2 [Source:ZFIN;Acc:ZDB-GENE-090313-376]	protein_coding	ENSDART00000132779,ENSDART00000137648
ENSDARG00000101831		67.8186		59.2601	1520	47.9499	1029	36.3944	727		109.564	2367	89.1315	1712	64.6114	1225		47.8681	87.7691	-1.82599	-0.86868	0.00719589	0.21841	16	813780	817937	1	irx1a	iroquois homeobox 1a [Source:ZFIN;Acc:ZDB-GENE-040707-1]	protein_coding	ENSDART00000161774,ENSDART00000162474
ENSDARG00000040982		13.6449		11.8676	304	12.2262	262	9.38	187		16.8223	363	16.8374	323	14.7359	279		11.1579	16.1319	-1.44712	-0.533181	0.00720108	0.21841	9	31838044	31915423	-1	fgf14	fibroblast growth factor 14 [Source:ZFIN;Acc:ZDB-GENE-060506-1]	protein_coding	ENSDART00000060051
ENSDARG00000058325		16.4854		17.8307	457	19.8646	426	19.0852	381		13.6753	295	13.2461	254	15.2104	288		18.9268	14.044	1.34793	0.430749	0.00724868	0.219442	6	13045885	13058979	1	casp8	caspase 8, apoptosis-related cysteine peptidase [Source:ZFIN;Acc:ZDB-GENE-000713-1]	protein_coding	ENSDART00000104757,ENSDART00000165896
ENSDARG00000094050		7.8908		5.74868	147	6.86994	147	6.42843	128		9.74164	210	8.3016	159	10.2545	194		6.34902	9.43258	-1.49193	-0.577178	0.00728779	0.219968	23	31401819	31403668	-1			protein_coding	ENSDART00000147498
ENSDARG00000090820		11.8821		14.1671	363	12.5522	269	16.1836	323		8.67723	187	8.56183	164	11.1508	211		14.301	9.46329	1.51605	0.60032	0.00730186	0.219968	11	2448781	2456786	-1	slc2a10	solute carrier family 2 member 10 [Source:NCBI gene;Acc:560546]	protein_coding	ENSDART00000167938,ENSDART00000171219
ENSDARG00000013968		588.463		653.81	16775	662.565	14225	673.884	13470		475.165	10267	525.082	10088	540.273	10247		663.42	513.507	1.29371	0.371518	0.00731109	0.219968	13	5004924	5028964	1	psap	prosaposin [Source:ZFIN;Acc:ZDB-GENE-020108-1]	protein_coding	ENSDART00000056295,ENSDART00000130379,ENSDART00000162425,ENSDART00000173235
ENSDARG00000095070		16.2976		13.4266	344	13.9961	300	14.8329	296		18.3957	397	18.9714	364	18.1629	344		14.0852	18.51	-1.31764	-0.397959	0.00733939	0.219968	9	13985567	13989879	1	cd28	CD28 molecule [Source:ZFIN;Acc:ZDB-GENE-070912-128]	protein_coding	ENSDART00000102296,ENSDART00000147200
ENSDARG00000033444		16.9083		14.9466	383	14.1824	304	14.7829	295		19.5527	422	18.3988	353	19.5864	371		14.6373	19.1793	-1.30983	-0.389376	0.00734598	0.219968	21	34033580	34075107	1	map4k6	mitogen-activated protein kinase kinase kinase kinase 6 [Source:ZFIN;Acc:ZDB-GENE-060512-339]	protein_coding	ENSDART00000100351
ENSDARG00000071233		21.5269		18.883	484	19.0728	409	16.9841	339		23.0236	497	24.072	462	27.1257	514		18.3133	24.7404	-1.34629	-0.428986	0.00734768	0.219968	23	6752828	6789033	1	zgc:158254	zgc:158254 [Source:ZFIN;Acc:ZDB-GENE-070112-2222]	protein_coding	ENSDART00000105179
ENSDARG00000104256		8.23985		10.4646	268	9.57134	205	10.2305	204		6.68725	144	4.8144	92	7.67112	145		10.0888	6.39092	1.60675	0.68415	0.00736773	0.22016	7	65261354	65290474	1	bco1	beta-carotene oxygenase 1 [Source:ZFIN;Acc:ZDB-GENE-010508-1]	protein_coding	ENSDART00000162471,ENSDART00000168388,ENSDART00000169566
ENSDARG00000054907		102.434		93.9471	2410	86.1887	1850	81.7686	1634		129.001	2787	105.839	2033	117.861	2235		87.3015	117.567	-1.34455	-0.427118	0.00738677	0.220228	12	25197383	25201576	-1	cox7a2l	cytochrome c oxidase subunit 7A2 like [Source:ZFIN;Acc:ZDB-GENE-030131-7691]	protein_coding	ENSDART00000077188
ENSDARG00000035420		22.5725		24.4173	626	25.7797	553	27.0894	541		20.5245	443	17.7743	341	19.85	376		25.7622	19.3829	1.32784	0.40908	0.00739725	0.220228	5	35682681	35743741	-1	ophn1	oligophrenin 1 [Source:ZFIN;Acc:ZDB-GENE-040718-464]	protein_coding	ENSDART00000046157,ENSDART00000123562,ENSDART00000144654
ENSDARG00000068709		53.8626		43.6705	1120	45.2019	970	46.2497	924		73.6523	1591	57.4345	1103	56.9666	1080		45.0407	62.6845	-1.38218	-0.466946	0.00745096	0.220408	18	25003207	25009666	1	fam174b	family with sequence similarity 174 member B [Source:NCBI gene;Acc:798908]	protein_coding	ENSDART00000099476,ENSDART00000132285
ENSDARG00000101911		23.9556		22.5465	578	18.8865	405	17.8345	356		26.7259	577	31.8271	611	25.9131	491		19.7559	28.1554	-1.42068	-0.506577	0.0074606	0.220408	13	41124594	41155472	-1	si:dkeyp-86d6.2	si:dkeyp-86d6.2 [Source:ZFIN;Acc:ZDB-GENE-141216-459]	protein_coding	ENSDART00000160588
ENSDARG00000078636		72.8955		64.3268	1650	56.613	1215	57.0054	1139		69.95	1511	94.024	1806	95.454	1810		59.315	86.476	-1.44625	-0.532317	0.00749515	0.220408	18	42773594	42778763	1			processed_pseudogene	ENSDART00000133173
ENSDARG00000063197		26.8785		25.5865	656	21.1222	453	21.8867	437		33.0198	713	30.4739	585	29.1819	553		22.8651	30.8918	-1.35184	-0.434927	0.0075045	0.220408	5	1432074	1487262	-1	golga2	golgin A2 [Source:NCBI gene;Acc:565431]	protein_coding	ENSDART00000092087,ENSDART00000144156,ENSDART00000148411,ENSDART00000148464,ENSDART00000149599,ENSDART00000150027
ENSDARG00000003250		6.99195		7.65841	196	9.52477	204	8.82971	176		4.55844	98	4.65826	89	6.72211	127		8.67096	5.31294	1.65163	0.723891	0.00751064	0.220408	23	29756603	29812667	-1	pik3cd	phosphatidylinositol-4,5-bisphosphate 3-kinase, catalytic subunit delta [Source:ZFIN;Acc:ZDB-GENE-040426-1128]	protein_coding	ENSDART00000006120
ENSDARG00000013224		13.6712		11.0881	284	11.3878	244	12.0814	241		17.5627	379	15.2239	292	14.6832	278		11.5191	15.8233	-1.37632	-0.460814	0.00752344	0.220408	6	48154954	48199276	1	phc2b	polyhomeotic homolog 2b (Drosophila) [Source:ZFIN;Acc:ZDB-GENE-040426-1113]	protein_coding	ENSDART00000019706
ENSDARG00000069185		24.2335		32.8357	842	24.6619	529	28.2901	565		21.3576	461	17.8784	343	20.3772	386		28.5959	19.871	1.43393	0.519972	0.00755024	0.220408	4	28190013	28335184	-1	celsr1a	cadherin EGF LAG seven-pass G-type receptor 1a [Source:ZFIN;Acc:ZDB-GENE-030616-78]	protein_coding	ENSDART00000043737,ENSDART00000123617,ENSDART00000178149
ENSDARG00000070080		47.7642		39.968	1025	41.0566	881	36.2944	725		48.3842	1045	53.6871	1031	67.1948	1274		39.1063	56.422	-1.43053	-0.516549	0.00757125	0.220408	10	34426256	34734995	1	nbeaa	neurobeachin a [Source:ZFIN;Acc:ZDB-GENE-050320-68]	protein_coding	ENSDART00000102566,ENSDART00000114630,ENSDART00000144529,ENSDART00000184999
ENSDARG00000016132		21.2398		25.2747	648	23.2646	499	23.7877	475		19.599	423	17.9825	345	17.5302	332		24.109	18.3705	1.31256	0.392383	0.00757985	0.220408	2	41835025	41861040	-1	keap1a	kelch-like ECH-associated protein 1a [Source:ZFIN;Acc:ZDB-GENE-030131-556]	protein_coding	ENSDART00000045763
ENSDARG00000036282		43.6031		51.3874	1318	46.0868	989	52.3529	1046		37.9253	819	40.5191	778	33.3469	632		49.9424	37.2638	1.34224	0.424639	0.0075949	0.220408	13	7049210	7065999	1	rnaset2	ribonuclease T2 [Source:NCBI gene;Acc:791890]	protein_coding	ENSDART00000128675,ENSDART00000161443,ENSDART00000164789,ENSDART00000168608,ENSDART00000178997
ENSDARG00000054911		2.67532		3.48818	89	4.02881	86	3.02661	60		2.15195	46	1.37926	26	1.97709	37		3.51454	1.8361	1.92999	0.948595	0.00759659	0.220408	21	26389391	26393520	1	tmsb	thymosin, beta [Source:NCBI gene;Acc:402820]	protein_coding	ENSDART00000077197,ENSDART00000185643
ENSDARG00000005800		1.31377		1.03281	26	0.535623	11	0.67536	13		1.96684	42	1.43131	27	2.2407	42		0.747932	1.87962	-2.52731	-1.3376	0.00760169	0.220408	7	66836476	66868543	-1	ampd3a	adenosine monophosphate deaminase 3a [Source:ZFIN;Acc:ZDB-GENE-110407-2]	protein_coding	ENSDART00000149680,ENSDART00000184462,ENSDART00000189424
ENSDARG00000077523		5.74331		6.64509	170	6.59049	141	7.37893	147		4.83611	104	4.55417	87	4.45505	84		6.8715	4.61511	1.48148	0.567037	0.00762186	0.220408	7	61906903	61962466	1	tdrd7b	Danio rerio tudor domain containing 7 b (tdrd7b), mRNA. [Source:RefSeq mRNA;Acc:NM_001353929]	protein_coding	ENSDART00000108540
ENSDARG00000013422		514.48		485.13	12447	422.56	9072	324.948	6495		589.936	12747	693.561	13325	570.747	10825		410.879	618.081	-1.51973	-0.603814	0.00762897	0.220408	11	30535943	30612166	-1	slc8a1a	solute carrier family 8 member 1a [Source:ZFIN;Acc:ZDB-GENE-050809-1]	protein_coding	ENSDART00000046800,ENSDART00000089803,ENSDART00000172244,ENSDART00000177984
ENSDARG00000102607		48.1812		41.9556	1076	38.0292	816	42.6978	853		58.0565	1254	48.5344	932	59.8136	1134		40.8942	55.4682	-1.35252	-0.435646	0.00763173	0.220408	5	65040228	65062719	1	pmpca	peptidase (mitochondrial processing) alpha [Source:ZFIN;Acc:ZDB-GENE-030131-5809]	protein_coding	ENSDART00000164278
ENSDARG00000094085		3.33907		6.21637	159	3.88909	83	3.62693	72		2.4759	53	1.7436	33	2.08254	39		4.57746	2.10068	2.16664	1.11546	0.00764603	0.220408	21	28946015	28952986	-1			processed_transcript	ENSDART00000136425,ENSDART00000140566,ENSDART00000141070,ENSDART00000142435,ENSDART00000142485,ENSDART00000144871
ENSDARG00000042835		14.1725		18.9609	486	15.6728	336	15.2331	304		10.806	233	11.8408	227	12.5216	237		16.6223	11.7228	1.42295	0.50889	0.00767014	0.220408	15	4421797	4528387	-1	tfdp2	transcription factor Dp-2 [Source:ZFIN;Acc:ZDB-GENE-030219-104]	protein_coding	ENSDART00000062868,ENSDART00000128602,ENSDART00000154297,ENSDART00000155619,ENSDART00000155945,ENSDART00000156852,ENSDART00000156930,ENSDART00000157273,ENSDART00000158122
ENSDARG00000044073		88.1869		91.4138	2345	101.605	2181	106.432	2127		79.8999	1726	74.2459	1426	75.5249	1432		99.8169	76.5569	1.30202	0.380746	0.00768275	0.220408	17	6438051	6451801	-1	fuca2	alpha-L-fucosidase 2 [Source:ZFIN;Acc:ZDB-GENE-040822-39]	protein_coding	ENSDART00000064700
ENSDARG00000008880		482.701		437.426	11223	435.182	9343	377.476	7545		548.378	11849	519.513	9981	578.233	10967		416.695	548.708	-1.31875	-0.399168	0.00768369	0.220408	21	23050310	23110930	-1	usp28	ubiquitin specific peptidase 28 [Source:ZFIN;Acc:ZDB-GENE-041008-142]	protein_coding	ENSDART00000003076,ENSDART00000147896,ENSDART00000184925,ENSDART00000190386
ENSDARG00000089066		27.4755		35.7977	918	33.4648	718	28.14	562		19.599	423	21.886	420	25.9658	492		32.4675	22.4836	1.45129	0.537332	0.00769016	0.220408	7	51467822	51627019	-1	nhsl2	NHS-like 2 [Source:ZFIN;Acc:ZDB-GENE-130530-951]	protein_coding	ENSDART00000082464,ENSDART00000174026,ENSDART00000174054,ENSDART00000174111,ENSDART00000174263,ENSDART00000174306
ENSDARG00000088560		12.5942		13.5435	347	15.3002	328	14.7329	294		10.297	222	10.4355	200	11.2562	213		14.5255	10.6629	1.36007	0.443679	0.00769559	0.220408	3	18840810	18923915	1	tmem104	transmembrane protein 104 [Source:ZFIN;Acc:ZDB-GENE-070822-4]	protein_coding	ENSDART00000128626,ENSDART00000133332,ENSDART00000148133,ENSDART00000181137
ENSDARG00000038541		14.0613		13.9332	357	17.9084	384	22.437	448		7.6591	165	10.4355	200	11.9944	227		18.0929	10.0297	1.80022	0.848172	0.00770898	0.220408	2	49984159	49985351	-1	ccr12a	chemokine (C-C motif) receptor 12a [Source:ZFIN;Acc:ZDB-GENE-060503-97]	protein_coding	ENSDART00000145888
ENSDARG00000088929		34.8329		30.809	790	30.8565	662	27.4396	548		36.213	782	44.0583	846	39.6209	751		29.7017	39.9641	-1.34171	-0.424073	0.00775381	0.220408	20	113949	116999	-1	ypel5	yippee-like 5 [Source:ZFIN;Acc:ZDB-GENE-040426-1220]	protein_coding	ENSDART00000149581
ENSDARG00000089564		22.8897		23.8327	611	32.8127	704	25.3885	507		16.6371	359	18.6591	358	20.0082	379		27.3446	18.4348	1.47413	0.559865	0.00779296	0.220408	11	22109887	22169026	1	si:dkey-91m3.1	si:dkey-91m3.1 [Source:ZFIN;Acc:ZDB-GENE-060810-84]	protein_coding	ENSDART00000122136,ENSDART00000190502
ENSDARG00000076919		1.43431		0.721021	18	0.721926	15	1.22565	24		2.01312	43	2.31612	44	1.60803	30		0.889534	1.97909	-2.30729	-1.2062	0.007831	0.220408	7	31625662	31759602	-1	igdcc4	immunoglobulin superfamily, DCC subclass, member 4 [Source:ZFIN;Acc:ZDB-GENE-080327-32]	protein_coding	ENSDART00000113467,ENSDART00000193040
ENSDARG00000011498		120.257		102.989	2642	108.592	2331	101.079	2020		134.462	2905	125.929	2419	148.493	2816		104.22	136.295	-1.30537	-0.384458	0.00783118	0.220408	18	18000695	18060544	1	si:ch211-212o1.2	si:ch211-212o1.2 [Source:ZFIN;Acc:ZDB-GENE-041111-310]	protein_coding	ENSDART00000146898,ENSDART00000147797
ENSDARG00000058094		4.24507		6.09945	156	6.03158	129	4.52741	90		2.79985	60	3.9296	75	2.08254	39		5.55281	2.93733	1.95196	0.96492	0.00784282	0.220408	19	8928434	8940068	-1	ciarta	circadian associated repressor of transcription a [Source:ZFIN;Acc:ZDB-GENE-030131-7016]	protein_coding	ENSDART00000043507
ENSDARG00000022203		27.6268		23.7158	608	25.1277	539	22.587	451		31.8165	687	33.7008	647	28.8128	546		23.8102	31.4434	-1.31891	-0.399346	0.00786769	0.220408	5	59494079	59550943	1	gtf2ird1	GTF2I repeat domain containing 1 [Source:ZFIN;Acc:ZDB-GENE-010328-18]	protein_coding	ENSDART00000148727,ENSDART00000149216,ENSDART00000189341
ENSDARG00000102890		1.27454		0.643073	16	1.04796	22	0.625333	12		1.50405	32	1.69155	32	2.13526	40		0.772121	1.77695	-2.34081	-1.22701	0.00786819	0.220408	15	3947696	3956906	-1	clrn1	clarin 1 [Source:ZFIN;Acc:ZDB-GENE-040718-420]	protein_coding	ENSDART00000171202
ENSDARG00000093940		6.99163		6.52816	167	4.30827	92	5.42789	108		8.76979	189	8.77002	168	8.14562	154		5.42144	8.56181	-1.58786	-0.667088	0.00787926	0.220408	13	37171976	37180815	-1	si:dkeyp-77c8.1	si:dkeyp-77c8.1 [Source:ZFIN;Acc:ZDB-GENE-090313-397]	protein_coding	ENSDART00000139907
ENSDARG00000086897		2.05521		2.16306	55	2.81784	60	3.57691	71		0.994989	21	1.22312	23	1.55531	29		2.8526	1.25781	2.23634	1.16114	0.00788116	0.220408	15	791220	805111	1	si:dkey-7i4.1	si:dkey-7i4.1 [Source:ZFIN;Acc:ZDB-GENE-081028-64]	protein_coding	ENSDART00000136137
ENSDARG00000044142		43.3178		33.4593	858	38.3087	822	26.6892	533		67.8675	1466	44.7349	859	48.8473	926		32.8191	53.8166	-1.62937	-0.704311	0.0079124	0.220408	17	25833947	25853922	1	acss1	acyl-CoA synthetase short chain family member 1 [Source:ZFIN;Acc:ZDB-GENE-050320-139]	protein_coding	ENSDART00000044328,ENSDART00000154604,ENSDART00000154789,ENSDART00000191994
ENSDARG00000061736		160.41		126.413	3243	156.658	3363	93.825	1875		198.142	4281	205.874	3955	181.55	3443		125.632	195.189	-1.58568	-0.665103	0.0079449	0.220408	17	20701582	20897407	-1	ank3a	ankyrin 3a [Source:ZFIN;Acc:ZDB-GENE-060621-1]	protein_coding	ENSDART00000088100,ENSDART00000088106,ENSDART00000149110,ENSDART00000149481,ENSDART00000149630,ENSDART00000150037,ENSDART00000150056
ENSDARG00000105209		71.2678		62.8847	1613	62.5281	1342	57.9559	1158		91.1456	1969	78.3056	1504	74.7868	1418		61.1229	81.4127	-1.32797	-0.409226	0.0079671	0.220408	24	39227519	39335218	1	si:ch73-103b11.2	si:ch73-103b11.2 [Source:ZFIN;Acc:ZDB-GENE-080917-14]	protein_coding	ENSDART00000165458,ENSDART00000168705,ENSDART00000184611,ENSDART00000190728,ENSDART00000193494
ENSDARG00000111342		2.52689		1.42256	36	2.30551	49	1.62587	32		3.26264	70	3.51321	67	3.03154	57		1.78464	3.26913	-1.88469	-0.914324	0.0079839	0.220408	12	2381213	2401234	1			protein_coding	ENSDART00000188007
ENSDARG00000018105		54.5558		44.9956	1154	43.8046	940	40.3465	806		61.805	1335	53.6351	1030	82.7479	1569		43.0489	66.0627	-1.51061	-0.595133	0.00798678	0.220408	7	73717581	73752955	-1	casq1b	calsequestrin 1b [Source:ZFIN;Acc:ZDB-GENE-060929-1070]	protein_coding	ENSDART00000009888,ENSDART00000158525,ENSDART00000171254
ENSDARG00000024276		172.464		153.227	3931	144.921	3111	120.489	2408		240.163	5189	201.919	3879	174.063	3301		139.546	205.381	-1.46666	-0.552531	0.00798877	0.220408	22	32289567	32507966	-1	pcbp4	poly(rC) binding protein 4 [Source:ZFIN;Acc:ZDB-GENE-040426-2122]	protein_coding	ENSDART00000104693,ENSDART00000137945,ENSDART00000148681,ENSDART00000148886
ENSDARG00000005629		51.0097		41.0203	1052	46.9718	1008	39.6962	793		53.1509	1148	56.6538	1088	68.5655	1300		42.5627	59.4568	-1.39223	-0.477397	0.0079929	0.220408	20	572037	592746	1	smyd2b	SET and MYND domain containing 2b [Source:NCBI gene;Acc:568616]	protein_coding	ENSDART00000028062,ENSDART00000031759,ENSDART00000152736,ENSDART00000162198
ENSDARG00000002336		17.232		13.6215	349	10.6892	229	7.57904	151		32.3719	699	23.6036	453	15.5268	294		10.6299	23.8341	-2.18454	-1.12733	0.0080028	0.220408	15	20463448	20468302	-1	dlc	deltaC [Source:NCBI gene;Acc:30120]	protein_coding	ENSDART00000018514,ENSDART00000148359
ENSDARG00000103364		637.917		575.862	14775	527.029	11315	498.241	9959		801.198	17312	631.884	12140	793.288	15046		533.711	742.123	-1.38496	-0.469844	0.00801376	0.220408	23	33907899	33928316	1	cs	citrate synthase [Source:NCBI gene;Acc:322339]	protein_coding	ENSDART00000159445
ENSDARG00000038834		159.975		140.95	3616	139.518	2995	132.596	2650		196.337	4242	162.206	3116	188.245	3570		137.688	182.263	-1.31984	-0.400366	0.00801814	0.220408	14	48070872	48103207	-1	etfdh	electron transfer flavoprotein dehydrogenase [Source:ZFIN;Acc:ZDB-GENE-040912-168]	protein_coding	ENSDART00000056712,ENSDART00000136870
ENSDARG00000100944		13.3395		12.6081	323	10.3166	221	10.2305	204		16.9148	365	14.6514	281	15.3159	290		11.0517	15.6274	-1.41192	-0.497659	0.00802066	0.220408	22	24214665	24219083	1	glrx2	glutaredoxin 2 [Source:ZFIN;Acc:ZDB-GENE-040718-101]	protein_coding	ENSDART00000162227,ENSDART00000163980,ENSDART00000167996
ENSDARG00000028478		8.71505		6.91791	177	6.73021	144	6.02821	120		11.6853	252	8.3016	159	12.627	239		6.55878	10.8713	-1.6308	-0.705582	0.00802731	0.220408	6	39499623	39503381	1	si:ch211-173n18.3	si:ch211-173n18.3 [Source:ZFIN;Acc:ZDB-GENE-120215-62]	protein_coding	ENSDART00000036057
ENSDARG00000100607		62.4327		53.0633	1361	56.1938	1206	50.4519	1008		79.5297	1718	71.7476	1378	63.6096	1206		53.2363	71.629	-1.34115	-0.423468	0.00802865	0.220408	18	41198559	41219790	-1	zbtb38	zinc finger and BTB domain containing 38 [Source:ZFIN;Acc:ZDB-GENE-091204-308]	protein_coding	ENSDART00000162387,ENSDART00000171431,ENSDART00000193753
ENSDARG00000069945		1.37628		1.53948	39	1.79317	38	2.42629	48		0.717318	15	0.858786	16	0.922643	17		1.91965	0.832915	2.25269	1.17165	0.00803014	0.220408	15	1116664	1120421	1	p2ry12	purinergic receptor P2Y12 [Source:ZFIN;Acc:ZDB-GENE-110208-4]	protein_coding	ENSDART00000102224,ENSDART00000154780
ENSDARG00000004871		1.98867		3.99485	102	1.7466	37	3.62693	72		1.4115	30	0.598548	11	0.553586	10		3.12279	0.854543	3.75839	1.91012	0.0080359	0.220408	11	35196587	35238756	1	mst1rb	macrophage stimulating 1 receptor b [Source:ZFIN;Acc:ZDB-GENE-071218-3]	protein_coding	ENSDART00000014018,ENSDART00000150006
ENSDARG00000041065		1260.07		1218	31251	1009.65	21677	1002.61	20041		1365.61	29508	1442.73	27719	1521.81	28864		1076.75	1443.38	-1.34494	-0.427537	0.00804408	0.220408	5	3568016	3584815	-1	hspb1	heat shock protein, alpha-crystallin-related, 1 [Source:NCBI gene;Acc:368243]	protein_coding	ENSDART00000060162,ENSDART00000149816,ENSDART00000152108
ENSDARG00000114870		45.5092		40.6695	1043	39.7525	853	36.4444	728		46.5794	1006	56.9661	1094	52.6434	998		38.9555	52.063	-1.33283	-0.414497	0.00805775	0.220409	14	51098036	51115196	1			protein_coding	ENSDART00000184118
ENSDARG00000069283		9.28769		7.42457	190	6.73021	144	8.17936	163		9.6028	207	11.3204	217	12.4689	236		7.44471	11.1307	-1.4876	-0.572983	0.00807906	0.220618	8	16738282	16757285	1	ercc8	excision repair cross-complementation group 8 [Source:ZFIN;Acc:ZDB-GENE-041010-60]	protein_coding	ENSDART00000100698,ENSDART00000134253,ENSDART00000134265,ENSDART00000138395
ENSDARG00000086705		30.4072		23.9106	613	29.6455	636	19.9356	398		40.1004	866	32.8681	631	35.9831	682		24.4973	36.3172	-1.49622	-0.581318	0.00810507	0.220955	21	30084823	30090942	1	prob1	proline-rich basic protein 1 [Source:ZFIN;Acc:ZDB-GENE-050309-179]	protein_coding	ENSDART00000154573
ENSDARG00000101540		33.0732		32.446	832	25.9195	556	25.6387	512		39.7764	859	36.3032	697	38.3556	727		28.0014	38.1451	-1.36677	-0.450774	0.00814731	0.221733	7	54605640	54609108	1	fgf3	fibroblast growth factor 3 [Source:NCBI gene;Acc:30549]	protein_coding	ENSDART00000168474
ENSDARG00000037997		38.7577		47.2171	1211	50.1855	1077	52.2529	1044		16.6834	360	29.3809	564	36.8266	698		49.8852	27.6303	1.91	0.933574	0.00821406	0.222429	16	10318893	10327620	1	tubb5	tubulin, beta 5 [Source:ZFIN;Acc:ZDB-GENE-031110-4]	protein_coding	ENSDART00000055380
ENSDARG00000074695		10.24		12.6081	323	11.9001	255	13.8824	277		5.57657	120	10.5396	202	6.933	131		12.7969	7.68307	1.73421	0.794282	0.00823576	0.222429	13	47623916	47691710	1	mertka	c-mer proto-oncogene tyrosine kinase a [Source:ZFIN;Acc:ZDB-GENE-081107-1]	protein_coding	ENSDART00000109266,ENSDART00000142729
ENSDARG00000070702		47.9275		50.5299	1296	52.654	1130	59.8569	1196		41.1648	889	40.2588	773	43.1006	817		54.347	41.5081	1.30635	0.385545	0.00825128	0.222429	19	24262263	24267823	-1	s100v2	S100 calcium binding protein V2 [Source:ZFIN;Acc:ZDB-GENE-030131-8909]	protein_coding	ENSDART00000104083,ENSDART00000132430
ENSDARG00000103840		8.0888		6.33329	162	6.68364	143	6.97872	139		8.9549	193	10.4876	201	9.09462	172		6.66522	9.51237	-1.42691	-0.512893	0.00825795	0.222429	6	25167250	25189739	-1	lrrc8db	leucine rich repeat containing 8 VRAC subunit Db [Source:ZFIN;Acc:ZDB-GENE-061013-487]	protein_coding	ENSDART00000159696,ENSDART00000161585,ENSDART00000181980
ENSDARG00000016038		15.993		22.5465	578	16.0454	344	19.2853	385		10.9912	237	12.9338	248	14.156	268		19.2924	12.6937	1.52419	0.608046	0.00826507	0.222429	18	18982077	18995283	1	hacd3	3-hydroxyacyl-CoA dehydratase 3 [Source:NCBI gene;Acc:393441]	protein_coding	ENSDART00000006300
ENSDARG00000057571		286.39		267.85	6872	213.9	4592	224.545	4488		351.185	7588	285.663	5488	375.199	7116		235.431	337.349	-1.43046	-0.516477	0.00826703	0.222429	21	19001669	19006641	-1	pgam2	phosphoglycerate mutase 2 (muscle) [Source:ZFIN;Acc:ZDB-GENE-040116-6]	protein_coding	ENSDART00000080269,ENSDART00000191682
ENSDARG00000009978		544.962		665.386	17072	644.307	13833	691.043	13813		300.371	6490	504.628	9695	464.037	8801		666.912	423.012	1.61448	0.691066	0.00827415	0.222429	16	23431189	23432552	1	icn	ictacalcin [Source:ZFIN;Acc:ZDB-GENE-030131-8599]	protein_coding	ENSDART00000004679
ENSDARG00000041078		39.2125		28.3537	727	23.8701	512	29.7909	595		58.473	1263	61.5984	1183	33.1888	629		27.3382	51.0867	-1.81059	-0.856456	0.00828296	0.222429	18	21122818	21145374	1	chka	choline kinase alpha [Source:ZFIN;Acc:ZDB-GENE-050208-149]	protein_coding	ENSDART00000060015,ENSDART00000060184
ENSDARG00000087198		14.9239		15.6871	402	19.9578	428	20.9362	418		14.1381	305	7.93726	152	10.8872	206		18.8603	10.9875	1.72919	0.790097	0.00832936	0.223304	19	12915498	12927089	1	cthrc1a	collagen triple helix repeat containing 1a [Source:ZFIN;Acc:ZDB-GENE-040808-22]	protein_coding	ENSDART00000132892
ENSDARG00000018881		69.7936		51.3094	1316	67.698	1453	50.1517	1002		92.3026	1994	70.9669	1363	86.333	1637		56.3864	83.2008	-1.48056	-0.566146	0.00838693	0.224431	22	641342	651719	-1	apobec2a	apolipoprotein B mRNA editing enzyme, catalytic polypeptide-like 2a [Source:ZFIN;Acc:ZDB-GENE-050306-15]	protein_coding	ENSDART00000148692
ENSDARG00000008413		96.2612		85.4508	2192	80.2735	1723	70.8128	1415		135.064	2918	107.296	2061	98.6701	1871		78.8457	113.677	-1.43313	-0.519174	0.00840468	0.224431	1	46263473	46401385	-1	atp11a	ATPase phospholipid transporting 11A [Source:ZFIN;Acc:ZDB-GENE-090311-52]	protein_coding	ENSDART00000040284,ENSDART00000132948,ENSDART00000145117,ENSDART00000150029,ENSDART00000193233
ENSDARG00000060498		12.2283		13.2707	340	12.6453	271	24.5881	491		8.21444	177	8.56183	164	6.08944	115		16.8347	7.62191	2.10039	1.07066	0.00842668	0.224431	23	30006206	30010042	1	tnfrsf9a	tumor necrosis factor receptor superfamily, member 9a [Source:ZFIN;Acc:ZDB-GENE-060421-8213]	protein_coding	ENSDART00000085294,ENSDART00000139118,ENSDART00000140836,ENSDART00000150153
ENSDARG00000009610		19.5784		17.363	445	17.2098	369	15.5833	311		21.0799	455	24.6445	473	21.5898	409		16.7187	22.4381	-1.33719	-0.419202	0.00843928	0.224431	7	18474563	18547420	-1	rgs12a	regulator of G protein signaling 12a [Source:ZFIN;Acc:ZDB-GENE-030131-2614]	protein_coding	ENSDART00000040534,ENSDART00000173539,ENSDART00000173969
ENSDARG00000009401		36.1532		37.5516	963	45.4348	975	51.1523	1022		20.4783	442	33.7529	648	28.5492	541		44.7129	27.5934	1.64543	0.718463	0.00845395	0.224431	10	43188678	43263885	1	vcanb	versican b [Source:ZFIN;Acc:ZDB-GENE-030131-2185]	protein_coding	ENSDART00000012522,ENSDART00000185584
ENSDARG00000032340		36.0227		30.6531	786	32.2072	691	30.5913	611		38.6195	834	38.6974	743	45.3677	860		31.1506	40.8948	-1.30915	-0.388635	0.00847131	0.224431	1	45650285	45662774	-1	serhl	serine hydrolase like [Source:NCBI gene;Acc:322648]	protein_coding	ENSDART00000042158,ENSDART00000125237
ENSDARG00000061852		11.5415		12.842	329	13.7632	295	13.0319	260		10.0193	216	9.70688	186	9.88546	187		13.2124	9.87055	1.33657	0.418534	0.00848161	0.224431	23	24789205	24797586	1	olfml3a	olfactomedin-like 3a [Source:NCBI gene;Acc:568106]	protein_coding	ENSDART00000088697
ENSDARG00000044485		2.63427		4.42356	113	3.93566	84	2.47632	49		1.828	39	1.6395	31	1.50259	28		3.61185	1.6567	2.15242	1.10596	0.00848244	0.224431	23	38940700	38952596	1	sall4	spalt-like transcription factor 4 [Source:ZFIN;Acc:ZDB-GENE-060328-2]	protein_coding	ENSDART00000065331
ENSDARG00000063912		13859.9		13041.7	334625	11387.7	244497	10514	210167		17923.9	387304	14619.5	280887	15672.9	297271		11647.8	16072.1	-1.38044	-0.465129	0.00850674	0.224706	MT	9735	10520	1	mt-co3	cytochrome c oxidase subunit III [Source:NCBI gene;Acc:140541]	protein_coding	ENSDART00000093613
ENSDARG00000071259		79.2218		69.4714	1782	71.9364	1544	67.6611	1352		89.9887	1944	83.6665	1607	92.607	1756		69.6896	88.7541	-1.2728	-0.34801	0.00853657	0.225017	17	10783599	10813885	-1	fbxo34	F-box protein 34 [Source:ZFIN;Acc:ZDB-GENE-030131-2194]	protein_coding	ENSDART00000153913,ENSDART00000157062
ENSDARG00000011615		3748.84		3322.6	85251	3443.94	73942	2701.12	53993		4049.54	87503	4262.41	81894	4713.47	89401		3155.88	4341.81	-1.3809	-0.465606	0.00856005	0.225017	7	31838320	31899925	1	mybpc3	myosin binding protein C, cardiac [Source:ZFIN;Acc:ZDB-GENE-070112-2362]	protein_coding	ENSDART00000099789,ENSDART00000122506,ENSDART00000138491,ENSDART00000139899,ENSDART00000144679,ENSDART00000173883,ENSDART00000174217
ENSDARG00000068261		97.6013		87.7502	2251	90.7997	1949	75.5653	1510		107.76	2328	111.408	2140	112.325	2130		84.7051	110.498	-1.30848	-0.387895	0.00856026	0.225017	1	343292	354166	-1	pros1	protein S [Source:ZFIN;Acc:ZDB-GENE-061013-657]	protein_coding	ENSDART00000098627,ENSDART00000136423,ENSDART00000141590
ENSDARG00000105403		4.31604		5.28099	135	5.51924	118	5.87813	117		4.14193	89	2.94069	56	2.13526	40		5.55946	3.07263	1.84665	0.884913	0.00857646	0.225076	3	36744518	36764865	-1	abcc6b.1	ATP-binding cassette, sub-family C (CFTR/MRP), member 6b, tandem duplicate 1 [Source:ZFIN;Acc:ZDB-GENE-050517-19]	protein_coding	ENSDART00000173186,ENSDART00000173388,ENSDART00000184853
ENSDARG00000053617		8.77132		5.04715	129	8.8727	190	6.02821	120		11.8242	255	9.86302	189	10.9926	208		6.64936	10.8933	-1.70195	-0.767192	0.00861912	0.22556	21	43897128	43952958	-1	camk2a	calcium/calmodulin-dependent protein kinase II alpha [Source:ZFIN;Acc:ZDB-GENE-051113-72]	protein_coding	ENSDART00000039571,ENSDART00000150983
ENSDARG00000075735		19.5667		23.4819	602	23.9167	513	19.9356	398		16.9148	365	17.1497	329	16.0013	303		22.4447	16.6886	1.34293	0.425382	0.00862279	0.22556	14	7932973	7967428	1	cxxc5b	CXXC finger protein 5b [Source:ZFIN;Acc:ZDB-GENE-130225-1]	protein_coding	ENSDART00000109941,ENSDART00000171657,ENSDART00000189773
ENSDARG00000004111		7.08183		11.6727	299	7.56858	162	7.8792	157		4.37332	94	5.75126	110	5.24588	99		9.04018	5.12349	1.77302	0.82621	0.00865411	0.226013	20	26359756	26383375	-1	esr1	estrogen receptor 1 [Source:NCBI gene;Acc:259252]	protein_coding	ENSDART00000024518,ENSDART00000087844,ENSDART00000166190,ENSDART00000192966
ENSDARG00000043835		2.06333		1.61743	41	1.56029	33	1.02555	20		2.52218	54	3.04479	58	2.60976	49		1.40109	2.72558	-1.94948	-0.963092	0.0086868	0.226501	11	6819050	6850593	1	rab3ab	RAB3A, member RAS oncogene family, b [Source:ZFIN;Acc:ZDB-GENE-041210-268]	protein_coding	ENSDART00000104289
ENSDARG00000052011		286.074		218.82	5614	186.28	3999	155.708	3112		570.638	12330	317.777	6105	267.224	5068		186.936	385.213	-1.96848	-0.97708	0.00870426	0.226562	7	44960188	44963154	-1	rrad	Ras-related associated with diabetes [Source:ZFIN;Acc:ZDB-GENE-030131-5607]	protein_coding	ENSDART00000073735
ENSDARG00000069464		264.504		245.128	6289	238.119	5112	200.732	4012		310.599	6711	288.526	5543	303.919	5764		227.993	301.014	-1.32482	-0.405795	0.00872559	0.226562	15	20403084	20405796	1	cox7a1	cytochrome c oxidase subunit 7A1 [Source:ZFIN;Acc:ZDB-GENE-060929-340]	protein_coding	ENSDART00000134182,ENSDART00000141388,ENSDART00000152734
ENSDARG00000067796		31.3051		28.2757	725	28.5743	613	22.0868	441		38.1567	824	33.8049	649	36.9321	700		26.3123	36.2979	-1.38465	-0.469526	0.00873867	0.226562	25	35565590	35599887	-1	clpxb	caseinolytic mitochondrial matrix peptidase chaperone subunit b [Source:ZFIN;Acc:ZDB-GENE-130404-1]	protein_coding	ENSDART00000153827,ENSDART00000187609,ENSDART00000188317
ENSDARG00000059123		44.0842		51.0366	1309	57.0787	1225	46.9	937		34.9172	754	42.9653	825	31.6071	599		51.6718	36.4965	1.42316	0.5091	0.0087452	0.226562	24	20372497	20419254	1	plcd1a	phospholipase C, delta 1a [Source:ZFIN;Acc:ZDB-GENE-071004-78]	protein_coding	ENSDART00000112349,ENSDART00000132340,ENSDART00000139989,ENSDART00000168751,ENSDART00000192909
ENSDARG00000060861		10.6168		8.55482	219	9.47819	203	8.42949	168		11.4539	247	11.9449	229	13.8396	262		8.82083	12.4128	-1.40211	-0.487603	0.00877209	0.226895	2	34138376	34173489	1	dars2	aspartyl-tRNA synthetase 2, mitochondrial [Source:ZFIN;Acc:ZDB-GENE-070912-443]	protein_coding	ENSDART00000137170
ENSDARG00000029764		128.592		91.141	2338	100.115	2149	127.593	2550		156.769	3387	158.147	3038	137.79	2613		106.283	150.902	-1.43131	-0.517338	0.00880948	0.227286	10	43544814	43655449	-1	mef2ca	myocyte enhancer factor 2ca [Source:ZFIN;Acc:ZDB-GENE-980526-253]	protein_coding	ENSDART00000097433,ENSDART00000099134,ENSDART00000131309,ENSDART00000131731,ENSDART00000134219,ENSDART00000134953,ENSDART00000138962
ENSDARG00000018266		9.10018		12.5302	321	13.344	286	9.38	187		4.651	100	9.18641	176	5.5095	104		11.7514	6.44897	1.9082	0.932214	0.00881531	0.227286	20	27646772	27687457	1	mthfd1a	methylenetetrahydrofolate dehydrogenase (NADP+ dependent) 1a, methenyltetrahydrofolate cyclohydrolase, formyltetrahydrofolate synthetase [Source:ZFIN;Acc:ZDB-GENE-041001-127]	protein_coding	ENSDART00000141697,ENSDART00000180557,ENSDART00000185628
ENSDARG00000087187		7.5551		4.9692	127	6.82337	146	5.57797	111		9.18629	198	7.78112	149	10.9926	208		5.79018	9.32001	-1.61664	-0.692996	0.00887109	0.228043	8	7205524	7308373	-1	grip2a	glutamate receptor interacting protein 2a [Source:ZFIN;Acc:ZDB-GENE-081104-132]	protein_coding	ENSDART00000092426,ENSDART00000132009,ENSDART00000136160,ENSDART00000140726,ENSDART00000145345
ENSDARG00000099717		13.0396		6.06048	155	6.77679	145	8.57957	171		16.0818	347	29.6411	569	11.0981	210		7.13895	18.9403	-2.49116	-1.31682	0.00887287	0.228043	21	2091895	2101392	1	si:rp71-1h20.9	si:rp71-1h20.9 [Source:ZFIN;Acc:ZDB-GENE-131127-386]	protein_coding	ENSDART00000161828
ENSDARG00000075188		6.75723		9.06148	232	7.24255	155	8.42949	168		4.28077	92	5.38693	103	6.14217	116		8.24451	5.26995	1.59141	0.670306	0.00889662	0.22829	8	20298369	20380750	-1	adamts10	ADAM metallopeptidase with thrombospondin type 1 motif, 10 [Source:ZFIN;Acc:ZDB-GENE-081104-414]	protein_coding	ENSDART00000113910
ENSDARG00000013110		24.1078		28.6265	734	27.4099	588	26.8393	536		17.8867	386	22.927	440	20.9572	397		27.6252	20.5903	1.35177	0.434847	0.00892544	0.228568	10	20108557	20146544	1	dmtn	dematin actin binding protein [Source:ZFIN;Acc:ZDB-GENE-030131-9438]	protein_coding	ENSDART00000064615,ENSDART00000139722,ENSDART00000142146,ENSDART00000142708
ENSDARG00000052129		16.3351		22.8973	587	17.0701	366	18.0346	360		12.1944	263	13.9748	268	13.8396	262		19.334	13.3363	1.44974	0.535796	0.00896816	0.228568	6	27062512	27089014	1	boka	BCL2 family apoptosis regulator BOK a [Source:NCBI gene;Acc:445218]	protein_coding	ENSDART00000149429,ENSDART00000168277
ENSDARG00000025549		50.8292		48.1525	1235	41.9416	900	40.0464	800		64.3966	1391	54.0515	1038	56.3867	1069		43.3801	58.2782	-1.34343	-0.425924	0.00899436	0.228568	13	33246150	33251757	1	ndufaf1	NADH:ubiquinone oxidoreductase complex assembly factor 1 [Source:ZFIN;Acc:ZDB-GENE-050306-9]	protein_coding	ENSDART00000035940,ENSDART00000131985,ENSDART00000132834,ENSDART00000136356,ENSDART00000141912,ENSDART00000144379,ENSDART00000147538,ENSDART00000148368
ENSDARG00000019644		816.91		738.852	18957	686.365	14736	622.757	12448		1059.11	22885	811.553	15592	982.825	18641		682.658	951.162	-1.38821	-0.47323	0.00899763	0.228568	4	16828752	16836006	-1	ldhba	lactate dehydrogenase Ba [Source:NCBI gene;Acc:30497]	protein_coding	ENSDART00000010777,ENSDART00000179867
ENSDARG00000039093		566.124		500.369	12838	496.662	10663	433.756	8670		691.008	14931	564.014	10836	710.936	13484		476.929	655.319	-1.36994	-0.454117	0.00900033	0.228568	13	40437550	40456995	1	got1	glutamic-oxaloacetic transaminase 1, soluble [Source:ZFIN;Acc:ZDB-GENE-040426-2003]	protein_coding	ENSDART00000057090,ENSDART00000148510,ENSDART00000149955,ENSDART00000167859
ENSDARG00000031745		48.6716		48.4643	1243	67.5117	1449	61.0075	1219		35.3337	763	32.816	630	46.8966	889		58.9945	38.3488	1.54324	0.625964	0.00900949	0.228568	8	36472444	36475328	-1	mhc2a	major histocompatibility complex class II integral membrane alpha chain gene [Source:ZFIN;Acc:ZDB-GENE-990415-150]	protein_coding	ENSDART00000048448
ENSDARG00000038643		399.528		515.491	13226	349.435	7502	730.915	14610		208.925	4514	303.776	5836	288.629	5474		531.947	267.11	1.92984	0.948483	0.0090177	0.228568	8	21353878	21369028	1	alas2	aminolevulinate, delta-, synthase 2 [Source:NCBI gene;Acc:64607]	protein_coding	ENSDART00000056420,ENSDART00000131691
ENSDARG00000088439		32.477		34.1608	876	40.0785	860	40.3465	806		22.0055	475	27.5072	528	30.7635	583		38.1953	26.7587	1.43917	0.525242	0.00905488	0.228568	14	26224541	26227970	1	gm2a	GM2 ganglioside activator [Source:ZFIN;Acc:ZDB-GENE-050417-373]	protein_coding	ENSDART00000128971,ENSDART00000168673
ENSDARG00000058690		3.37248		1.69537	43	1.9329	41	3.07664	61		3.58659	77	5.69921	109	4.24416	80		2.23497	4.50999	-2.07408	-1.05247	0.00905586	0.228568	19	7636941	7680056	1	cgnb	cingulin b [Source:NCBI gene;Acc:100005752]	protein_coding	ENSDART00000081611,ENSDART00000112404,ENSDART00000163805
ENSDARG00000061520		26.5241		17.1681	440	16.3248	350	17.5343	350		54.7707	1183	25.0609	481	28.2856	536		17.0091	36.0391	-1.99818	-0.998687	0.00905663	0.228568	23	28097282	28123767	-1	b4galnt1a	beta-1,4-N-acetyl-galactosaminyl transferase 1a [Source:ZFIN;Acc:ZDB-GENE-070112-1462]	protein_coding	ENSDART00000087815,ENSDART00000142514
ENSDARG00000059883		21.4092		23.2091	595	26.4784	568	28.6403	572		12.1481	262	18.8673	362	19.1119	362		26.1092	16.7091	1.59605	0.674509	0.0090664	0.228568	5	42136359	42158556	1	trpv1	transient receptor potential cation channel, subfamily V, member 1 [Source:ZFIN;Acc:ZDB-GENE-030912-8]	protein_coding	ENSDART00000083731,ENSDART00000140743,ENSDART00000172201
ENSDARG00000100560		13.3037		18.766	481	14.1824	304	16.4838	329		10.2044	220	12.7256	244	7.46023	141		16.4774	10.1301	1.65723	0.728778	0.00907711	0.228568	19	13193215	13286738	-1	zfpm2b	zinc finger protein, FOG family member 2b [Source:ZFIN;Acc:ZDB-GENE-060130-5]	protein_coding	ENSDART00000158330,ENSDART00000168296
ENSDARG00000086616		7.7605		9.02251	231	9.75765	209	9.83024	196		4.28077	92	6.84426	131	6.82756	129		9.5368	5.9842	1.64135	0.714885	0.0091323	0.2296	16	8716800	8725803	1	cabz01093075.1	cabz01093075.1 [Source:ZFIN;Acc:ZDB-GENE-160113-9]	protein_coding	ENSDART00000124693,ENSDART00000181961
ENSDARG00000095059		3.64016		4.26767	109	5.28636	113	4.77755	95		1.59661	34	3.46117	66	2.45159	46		4.77719	2.50312	2.01179	1.00848	0.00916564	0.229842	2	31611034	31614391	-1	si:ch211-106h4.5	si:ch211-106h4.5 [Source:ZFIN;Acc:ZDB-GENE-070705-15]	protein_coding	ENSDART00000131507,ENSDART00000137054,ENSDART00000137674,ENSDART00000141780,ENSDART00000143532,ENSDART00000145662,ENSDART00000146427,ENSDART00000147041,ENSDART00000147142
ENSDARG00000026109		17.6424		20.403	523	22.6126	485	19.5354	390		12.4721	269	13.09	251	17.7411	336		20.8503	14.4344	1.46518	0.551077	0.00918372	0.229842	6	38896158	38902498	1	slc48a1b	solute carrier family 48 member 1b [Source:NCBI gene;Acc:792763]	protein_coding	ENSDART00000029930,ENSDART00000131347
ENSDARG00000030687		161.339		149.368	3832	122.89	2638	99.2779	1984		235.396	5086	202.856	3897	158.246	3001		123.846	198.833	-1.60677	-0.684162	0.00918457	0.229842	11	33870357	33919309	-1	phka2	phosphorylase kinase, alpha 2 (liver) [Source:ZFIN;Acc:ZDB-GENE-130422-1]	protein_coding	ENSDART00000078202,ENSDART00000181203
ENSDARG00000004529		5.74979		4.34561	111	4.26169	91	3.92709	78		6.27074	135	9.49869	182	6.19489	117		4.17813	7.32144	-1.70714	-0.771578	0.0092045	0.229984	18	14277003	14332060	1	zgc:173742	zgc:173742 [Source:ZFIN;Acc:ZDB-GENE-030131-6489]	protein_coding	ENSDART00000006628,ENSDART00000151641,ENSDART00000186558
ENSDARG00000079387		19.186		20.5588	527	21.1687	454	29.991	599		16.4983	356	11.3724	218	15.5268	294		23.9062	14.4658	1.63733	0.711342	0.00925736	0.230127	5	26824303	26834707	-1	si:ch211-102c2.4	si:ch211-102c2.4 [Source:ZFIN;Acc:ZDB-GENE-030131-8862]	protein_coding	ENSDART00000113246,ENSDART00000136713,ENSDART00000192932
ENSDARG00000037746		1610.26		1745.24	44779	1744.1	37446	2185.59	43688		1540.4	33285	1213.2	23309	1232.99	23386		1891.65	1328.87	1.42417	0.510122	0.00926406	0.230127	1	8649099	8653385	-1	actb1	actin, beta 1 [Source:NCBI gene;Acc:57934]	protein_coding	ENSDART00000054987,ENSDART00000133319,ENSDART00000135318,ENSDART00000138324,ENSDART00000141407,ENSDART00000148067,ENSDART00000193041
ENSDARG00000063924		11940.7		10457.8	268327	10208.2	219172	9198.48	183871		15621.4	337551	11721.5	225207	14436.8	273825		9954.82	13926.6	-1.3911	-0.476226	0.00927284	0.230127	MT	15308	16448	1	mt-cyb	cytochrome b [Source:NCBI gene;Acc:140512]	protein_coding	ENSDART00000093625
ENSDARG00000096576		2.40886		2.90357	74	3.33017	71	2.87653	57		1.78172	38	1.84769	35	1.71348	32		3.03676	1.78096	1.69991	0.765458	0.00928198	0.230127	1	55279124	55287260	1	si:ch211-286b5.6	si:ch211-286b5.6 [Source:ZFIN;Acc:ZDB-GENE-121214-216]	protein_coding	ENSDART00000152660
ENSDARG00000105433		5.32539		8.16508	209	6.77679	145	5.47792	109		2.89241	62	4.55417	87	4.08599	77		6.8066	3.84419	1.81655	0.861198	0.00928852	0.230127	7	8367627	8371465	1	zgc:172143	zgc:172143 [Source:ZFIN;Acc:ZDB-GENE-080219-22]	protein_coding	ENSDART00000057103,ENSDART00000173094,ENSDART00000173303
ENSDARG00000077326		27.8931		32.7967	841	30.8565	662	35.544	710		17.6553	381	24.5405	471	25.9658	492		33.0657	22.7205	1.47776	0.563413	0.0093461	0.230127	16	30905551	30932533	-1	slc45a4b	solute carrier family 45 member 4b [Source:ZFIN;Acc:ZDB-GENE-091230-5]	protein_coding	ENSDART00000085761,ENSDART00000132643,ENSDART00000156804,ENSDART00000184015,ENSDART00000187838
ENSDARG00000102412		175.935		156.345	4011	145.526	3124	145.052	2899		217.717	4704	172.252	3309	218.719	4148		148.974	202.896	-1.35456	-0.437822	0.00938675	0.230127	24	2933687	2972039	1	eci2	enoyl-CoA delta isomerase 2 [Source:ZFIN;Acc:ZDB-GENE-040718-392]	protein_coding	ENSDART00000162573,ENSDART00000163760,ENSDART00000164449,ENSDART00000170835
ENSDARG00000063416		74.1133		76.3698	1959	84.5585	1815	89.7729	1794		64.6743	1397	66.9072	1285	62.397	1183		83.567	64.6595	1.29021	0.367604	0.00939085	0.230127	20	1441548	1560849	-1	ptprk	protein tyrosine phosphatase receptor type K [Source:ZFIN;Acc:ZDB-GENE-030131-9834]	protein_coding	ENSDART00000092508,ENSDART00000133369,ENSDART00000138059,ENSDART00000141156,ENSDART00000179193
ENSDARG00000038446		29.0569		37.5516	963	30.9031	663	33.9431	678		20.5708	444	22.7708	437	28.6019	542		34.1326	23.9812	1.43634	0.522401	0.00939115	0.230127	9	14367570	14504834	-1	nrp2b	neuropilin 2b [Source:ZFIN;Acc:ZDB-GENE-040611-3]	protein_coding	ENSDART00000056103
ENSDARG00000095675		182.695		152.837	3921	177.477	3810	128.043	2559		224.243	4845	197.911	3802	215.661	4090		152.786	212.605	-1.40201	-0.487496	0.0093945	0.230127	9	43074531	43142677	-1	ccdc141	coiled-coil domain containing 141 [Source:ZFIN;Acc:ZDB-GENE-081104-472]	protein_coding	ENSDART00000134349,ENSDART00000142257,ENSDART00000181835
ENSDARG00000105460		28.374		23.2091	595	24.2893	521	17.0341	340		40.1004	866	38.8015	745	26.8094	508		21.5108	35.2371	-1.62774	-0.702871	0.00942057	0.230127	16	10397440	10404383	-1	si:ch73-54f23.4	si:ch73-54f23.4 [Source:ZFIN;Acc:ZDB-GENE-160113-43]	protein_coding	ENSDART00000173412
ENSDARG00000095627		77.4047		83.9697	2154	102.164	2193	113.085	2260		34.1767	738	63.7323	1224	67.3002	1276		99.7397	55.0697	1.87881	0.909822	0.00945327	0.230127	21	22717824	22720381	-1	c1qc	complement component 1, q subcomponent, C chain [Source:ZFIN;Acc:ZDB-GENE-041010-51]	protein_coding	ENSDART00000130789
ENSDARG00000097339		32.8775		52.7515	1353	32.5332	698	39.9963	799		18.766	405	30.8903	593	22.328	423		41.7603	23.9947	1.75002	0.807368	0.00945721	0.230127	17	53418445	53424873	1	slc9a1b	solute carrier family 9 member A1b [Source:ZFIN;Acc:ZDB-GENE-080225-42]	protein_coding	ENSDART00000097631,ENSDART00000157022
ENSDARG00000087032		24.0614		35.7977	918	26.5715	570	31.4418	628		23.4864	507	10.3315	198	16.7394	317		31.2703	16.8524	1.9331	0.95092	0.00947168	0.230127	23	7471072	7504017	1	rbbp8l	retinoblastoma binding protein 8-like [Source:ZFIN;Acc:ZDB-GENE-030131-3078]	protein_coding	ENSDART00000135551
ENSDARG00000053124		3.85771		4.34561	111	5.14663	110	4.72752	94		2.84613	61	2.7325	52	3.34788	63		4.73992	2.9755	1.59175	0.670614	0.00947916	0.230127	7	34789353	34791992	1	si:dkey-148a17.6	si:dkey-148a17.6 [Source:ZFIN;Acc:ZDB-GENE-160728-65]	protein_coding	ENSDART00000075116,ENSDART00000173578
ENSDARG00000040649		18.8866		15.6091	400	17.629	378	12.9819	259		25.5689	552	21.4696	412	20.0609	380		15.4067	22.3665	-1.45483	-0.540855	0.00947955	0.230127	25	314608	348784	-1	prickle1a	prickle homolog 1a [Source:ZFIN;Acc:ZDB-GENE-030724-5]	protein_coding	ENSDART00000059514
ENSDARG00000039066		172.232		159.268	4086	143.337	3077	113.936	2277		184.212	3980	191.197	3673	241.442	4579		138.847	205.617	-1.48446	-0.569936	0.00948823	0.230127	13	2338761	2350762	1	klhl31	kelch-like family member 31 [Source:NCBI gene;Acc:407079]	protein_coding	ENSDART00000102791,ENSDART00000129911
ENSDARG00000010717		94.4935		82.9954	2129	76.9666	1652	81.1683	1622		122.384	2644	94.2322	1810	109.215	2071		80.3768	108.61	-1.3442	-0.426745	0.0094983	0.230127	21	15704556	15708626	1	chchd10	coiled-coil-helix-coiled-coil-helix domain containing 10 [Source:ZFIN;Acc:ZDB-GENE-040426-1753]	protein_coding	ENSDART00000024858,ENSDART00000146909
ENSDARG00000098237		15.0117		17.7137	454	18.9797	407	15.9335	318		12.7497	275	10.6958	205	13.9978	265		17.5423	12.4811	1.4118	0.497535	0.00950346	0.230127	22	4524367	4649238	-1	fbn2b	fibrillin 2b [Source:ZFIN;Acc:ZDB-GENE-090112-3]	protein_coding	ENSDART00000125302,ENSDART00000167748
ENSDARG00000098746		18.073		11.1661	286	10.8755	233	17.7345	354		18.2569	394	28.2879	543	22.1171	419		13.2587	22.8873	-1.75475	-0.811267	0.00950525	0.230127	14	4151374	4161770	1	dhrs13l1	dehydrogenase/reductase (SDR family) member 13 like 1 [Source:ZFIN;Acc:ZDB-GENE-040426-1907]	protein_coding	ENSDART00000160431,ENSDART00000166766
ENSDARG00000017591		218.374		201.672	5174	183.625	3942	183.073	3659		223.687	4833	261.721	5028	256.468	4864		189.457	247.292	-1.30364	-0.38255	0.00951002	0.230127	1	17376922	17524922	1	fat1a	FAT atypical cadherin 1a [Source:ZFIN;Acc:ZDB-GENE-050425-1]	protein_coding	ENSDART00000131333,ENSDART00000145068
ENSDARG00000045612		39.7442		36.889	946	33.2785	714	21.5365	430		51.9477	1122	51.4491	988	43.3642	822		30.568	48.9203	-1.6309	-0.705667	0.00952675	0.230127	25	28672539	28674739	-1	lrrc10	leucine rich repeat containing 10 [Source:ZFIN;Acc:ZDB-GENE-071119-6]	protein_coding	ENSDART00000067073
ENSDARG00000056583		83.4737		77.5	1988	69.8871	1500	70.1624	1402		98.8741	2136	85.7485	1647	98.6701	1871		72.5165	94.4309	-1.30089	-0.379503	0.0095376	0.230127	19	28281201	28283877	-1	ndufs6	NADH:ubiquinone oxidoreductase subunit S6 [Source:ZFIN;Acc:ZDB-GENE-040912-86]	protein_coding	ENSDART00000079104,ENSDART00000151756
ENSDARG00000005139		3.88416		7.85328	201	4.86718	104	4.22725	84		2.15195	46	0.962881	18	3.24243	61		5.64924	2.11909	2.94247	1.55703	0.00958614	0.230145	24	20559009	20572170	1	hhatlb	hedgehog acyltransferase like, b [Source:ZFIN;Acc:ZDB-GENE-050506-130]	protein_coding	ENSDART00000131677
ENSDARG00000012368		7.94665		5.94355	152	7.1494	153	6.32837	126		8.35328	180	9.96712	191	9.93818	188		6.47377	9.41953	-1.45448	-0.540503	0.00958896	0.230145	9	49808483	49860756	-1	ttc21b	tetratricopeptide repeat domain 21B [Source:ZFIN;Acc:ZDB-GENE-031010-34]	protein_coding	ENSDART00000044270,ENSDART00000162271
ENSDARG00000058548		407.618		374.912	9619	362.523	7783	319.795	6392		500.387	10812	452.736	8698	435.356	8257		352.41	462.826	-1.31417	-0.394149	0.00959603	0.230145	16	7662609	7681144	1	bves	blood vessel epicardial substance [Source:NCBI gene;Acc:415107]	protein_coding	ENSDART00000081418,ENSDART00000081422,ENSDART00000149404,ENSDART00000184895
ENSDARG00000104470		12.3049		11.361	291	9.80422	210	10.3805	207		14.0455	303	13.8186	265	14.4196	273		10.5152	14.0946	-1.33819	-0.42028	0.00960116	0.230145	11	45159353	45171208	-1	syngr2b	synaptogyrin 2b [Source:ZFIN;Acc:ZDB-GENE-070424-19]	protein_coding	ENSDART00000158156,ENSDART00000161712,ENSDART00000167036
ENSDARG00000042535		14964.1		14222.3	364915	12950.5	278051	11952.1	238915		17192.8	371506	16579.2	318538	16888	320319		13041.6	16886.7	-1.29806	-0.376363	0.00961514	0.230145	20	29476852	29483514	-1	actc1a	actin alpha cardiac muscle 1a [Source:ZFIN;Acc:ZDB-GENE-040520-4]	protein_coding	ENSDART00000062370,ENSDART00000178308
ENSDARG00000006283		23.5547		20.0132	513	19.4454	417	20.4359	408		31.3537	677	24.9048	478	25.175	477		19.9648	27.1445	-1.35451	-0.437773	0.00964437	0.230145	4	4079418	4111767	1	waslb	WASP like actin nucleation promoting factor b [Source:ZFIN;Acc:ZDB-GENE-040426-718]	protein_coding	ENSDART00000028016
ENSDARG00000003952		450.914		527.105	13524	487.114	10458	523.004	10454		344.243	7438	401.053	7705	422.966	8022		512.408	389.421	1.31974	0.400253	0.00966988	0.230145	22	35179575	35194243	-1	pfn2	profilin 2 [Source:ZFIN;Acc:ZDB-GENE-040115-4]	protein_coding	ENSDART00000104687,ENSDART00000164443
ENSDARG00000040118		1.8394		2.66973	68	2.44523	52	2.17616	43		1.22638	26	0.910833	17	1.60803	30		2.43037	1.24842	2.00707	1.00509	0.00967269	0.230145	16	38360002	38389883	1	zgc:113232	zgc:113232 [Source:ZFIN;Acc:ZDB-GENE-050327-86]	protein_coding	ENSDART00000087346,ENSDART00000148101
ENSDARG00000086033		28.0263		26.1711	671	19.818	425	21.3864	427		30.1042	650	30.2136	580	40.4645	767		22.4585	33.5941	-1.4857	-0.571141	0.00967999	0.230145	7	69601812	69636502	-1	tspan5a	tetraspanin 5a [Source:ZFIN;Acc:ZDB-GENE-041010-145]	protein_coding	ENSDART00000126739
ENSDARG00000032469		214.073		176.144	4519	204.491	4390	145.002	2898		273.715	5914	220.604	4238	264.482	5016		175.212	252.934	-1.45142	-0.537468	0.00969101	0.230145	18	16762806	16795262	-1	ampd3b	adenosine monophosphate deaminase 3b [Source:ZFIN;Acc:ZDB-GENE-030131-5929]	protein_coding	ENSDART00000048722,ENSDART00000145546,ENSDART00000148222
ENSDARG00000008568		29.6056		32.368	830	31.1825	669	39.296	785		23.5326	508	23.7597	456	27.4948	521		34.2822	24.929	1.37147	0.455727	0.00970694	0.230145	20	34653916	34670236	-1	slc25a24	solute carrier family 25 member 24 [Source:NCBI gene;Acc:447867]	protein_coding	ENSDART00000033325,ENSDART00000132545
ENSDARG00000088975		98.1884		121.229	3110	111.433	2392	111.234	2223		99.6146	2152	73.1529	1405	72.467	1374		114.632	81.7448	1.41711	0.502948	0.00972249	0.230145	1	9100447	9114936	-1	si:ch211-14k19.8	si:ch211-14k19.8 [Source:ZFIN;Acc:ZDB-GENE-051214-4]	protein_coding	ENSDART00000146642,ENSDART00000163624
ENSDARG00000052074		16.4708		19.7404	506	17.1166	367	20.8361	416		14.9248	322	11.8929	228	14.3141	271		19.231	13.7106	1.40171	0.487193	0.00973219	0.230145	7	51816321	51825070	1	si:ch211-122f10.4	si:ch211-122f10.4 [Source:ZFIN;Acc:ZDB-GENE-140106-45]	protein_coding	ENSDART00000073846,ENSDART00000174101,ENSDART00000174120
ENSDARG00000044175		2.3518		1.77332	45	1.83975	39	1.22565	24		2.56846	55	3.46117	66	3.24243	61		1.61291	3.09069	-1.90212	-0.927608	0.00973767	0.230145	6	46668717	46687079	1	oxtrl	oxytocin receptor like [Source:ZFIN;Acc:ZDB-GENE-110805-1]	protein_coding	ENSDART00000064853
ENSDARG00000102362		229.387		212.039	5440	188.283	4042	197.33	3944		246.225	5320	247.877	4762	284.569	5397		199.217	259.557	-1.30163	-0.380323	0.0097554	0.230228	6	3961319	3982783	-1	slc25a12	solute carrier family 25 member 12 [Source:ZFIN;Acc:ZDB-GENE-031006-11]	protein_coding	ENSDART00000167171,ENSDART00000167753,ENSDART00000171944
ENSDARG00000097236		56.0001		48.0356	1232	52.3746	1124	45.1991	903		61.9901	1339	59.3083	1139	69.0928	1310		48.5364	63.4637	-1.30715	-0.38642	0.00977546	0.230364	25	35348607	35360154	-1	si:ch73-147o17.1	si:ch73-147o17.1 [Source:ZFIN;Acc:ZDB-GENE-131127-226]	protein_coding	ENSDART00000154053,ENSDART00000171917
ENSDARG00000055186		32.1931		33.6931	864	48.1827	1034	51.6525	1032		9.37141	202	27.351	525	22.9079	434		44.5095	19.8768	2.45309	1.2946	0.00983812	0.231186	2	32796873	32799083	1	ccr9a	chemokine (C-C motif) receptor 9a [Source:ZFIN;Acc:ZDB-GENE-060130-125]	protein_coding	ENSDART00000077511
ENSDARG00000028213		2409.44		2304.75	59135	2086.67	44801	1767.47	35330		2824.22	61026	2856.24	54877	2617.27	49642		2052.96	2765.91	-1.35442	-0.437674	0.00984044	0.231186	9	42894845	43073960	-1	ttn.2	titin, tandem duplicate 2 [Source:ZFIN;Acc:ZDB-GENE-030113-2]	protein_coding	ENSDART00000059460,ENSDART00000109099,ENSDART00000126871,ENSDART00000138515
ENSDARG00000040644		3.05247		3.56613	91	4.07539	87	3.77701	75		2.29079	49	2.6284	50	1.97709	37		3.80618	2.29876	1.65865	0.730011	0.00987653	0.231186	15	41815703	41845709	1	pxylp1	2-phosphoxylose phosphatase 1 [Source:NCBI gene;Acc:436703]	protein_coding	ENSDART00000059508,ENSDART00000137434
ENSDARG00000094889		18.2309		17.324	444	15.3933	330	11.6812	233		23.3475	504	21.2094	407	20.4299	387		14.7995	21.6623	-1.47139	-0.557178	0.00988123	0.231186	2	55890673	56003799	-1	cplx4c	complexin 4c [Source:ZFIN;Acc:ZDB-GENE-101018-1]	protein_coding	ENSDART00000128828,ENSDART00000136724,ENSDART00000140309,ENSDART00000150179
ENSDARG00000087657		52.476		41.2541	1058	44.3635	952	50.0517	1000		60.6943	1311	54.9883	1056	63.5042	1204		45.2231	59.7289	-1.323	-0.403815	0.00988183	0.231186	12	33361948	33472581	1	ccdc57	fatty acid synthase [Source:ZFIN;Acc:ZDB-GENE-030131-7802]	protein_coding	ENSDART00000124083,ENSDART00000124982,ENSDART00000129458,ENSDART00000149644,ENSDART00000149960,ENSDART00000185053
ENSDARG00000068086		2.85436		1.96819	50	2.1192	45	1.72592	34		4.97495	107	3.20093	61	3.13699	59		1.93777	3.77095	-1.92035	-0.941373	0.00993018	0.231982	23	1140306	1144425	-1	psmb11b	proteasome 20S subunit beta 11b [Source:ZFIN;Acc:ZDB-GENE-170530-2]	protein_coding	ENSDART00000098271
ENSDARG00000011222		14.5113		12.6471	324	12.2262	262	8.92976	178		21.2187	458	16.9935	326	15.0523	285		11.2677	17.7548	-1.57147	-0.652114	0.00997691	0.232557	13	33282095	33293654	1	ccdc28b	coiled-coil domain containing 28B [Source:ZFIN;Acc:ZDB-GENE-060208-3]	protein_coding	ENSDART00000135200
ENSDARG00000078894		21.4083		18.9219	485	18.5139	397	17.9346	358		23.8103	514	22.3545	429	26.9148	510		18.4568	24.3599	-1.3146	-0.394629	0.0100245	0.232557	6	41510135	41536323	-1	hemk1	HemK methyltransferase family member 1 [Source:ZFIN;Acc:ZDB-GENE-050208-185]	protein_coding	ENSDART00000113157
ENSDARG00000112884		10.672		8.35995	214	9.29189	199	9.32997	186		12.287	265	13.4543	258	11.309	214		8.99394	12.3501	-1.37669	-0.461205	0.0100336	0.232557	KN149695.1	152954	158947	1			protein_coding	ENSDART00000182450
ENSDARG00000045485		20.7604		17.5968	451	17.3495	372	16.1336	322		27.7903	600	25.7896	495	19.9027	377		17.0266	24.4942	-1.42616	-0.512139	0.0100456	0.232557	4	20507105	20521441	-1	rassf8b	Ras association domain family member 8b [Source:ZFIN;Acc:ZDB-GENE-040426-1338]	protein_coding	ENSDART00000066895,ENSDART00000185806
ENSDARG00000097847		3.4004		4.34561	111	3.42333	73	5.97819	119		1.73545	37	2.78455	53	2.13526	40		4.58238	2.21842	2.05198	1.03702	0.0100472	0.232557	16	53247831	53259409	-1	si:ch211-269k10.4	si:ch211-269k10.4 [Source:ZFIN;Acc:ZDB-GENE-131121-414]	protein_coding	ENSDART00000157080,ENSDART00000157268
ENSDARG00000102726		1.27837		0.682047	17	0.954805	20	0.625333	12		1.31894	28	1.79564	34	2.29343	43		0.754062	1.80267	-2.35089	-1.23321	0.0100602	0.232557	10	21670831	21674458	1			processed_transcript	ENSDART00000157600,ENSDART00000158565,ENSDART00000162788,ENSDART00000165731,ENSDART00000167217,ENSDART00000169255
ENSDARG00000020693		162.003		184.25	4727	204.631	4393	165.063	3299		130.945	2829	146.228	2809	140.901	2672		184.648	139.358	1.32122	0.401873	0.0100647	0.232557	20	32152355	32231157	1	sesn1	sestrin 1 [Source:ZFIN;Acc:ZDB-GENE-040718-408]	protein_coding	ENSDART00000062993,ENSDART00000139507,ENSDART00000147448,ENSDART00000152904
ENSDARG00000069404		2156.6		1997.05	51240	1931.43	41468	1533.89	30661		2405.54	51979	2694.9	51777	2376.81	45081		1820.79	2492.41	-1.37599	-0.460474	0.0100699	0.232557	20	41911214	41926484	-1		phospholamban [Source:NCBI gene;Acc:555548]	antisense	ENSDART00000132012,ENSDART00000133911,ENSDART00000141159
ENSDARG00000039486		88.3524		74.6549	1915	58.6157	1258	70.2124	1403		100.216	2165	140.398	2697	86.0167	1631		67.8277	108.877	-1.57942	-0.659396	0.0101049	0.232833	13	25486608	25498661	1	bag3	BCL2 associated athanogene 3 [Source:ZFIN;Acc:ZDB-GENE-040801-40]	protein_coding	ENSDART00000057689
ENSDARG00000059798		44.7638		36.0705	925	36.8182	790	27.2395	544		74.5316	1610	46.9209	901	47.0021	891		33.3761	56.1515	-1.65455	-0.726436	0.0101106	0.232833	7	48555400	48658172	1	kcnq1.1	potassium voltage-gated channel, KQT-like subfamily, member 1.1 [Source:ZFIN;Acc:ZDB-GENE-061214-5]	protein_coding	ENSDART00000083514,ENSDART00000125483,ENSDART00000174474
ENSDARG00000068940		251.708		222.835	5717	216.555	4649	217.291	4343		300.741	6498	253.602	4872	299.226	5675		218.893	284.523	-1.29591	-0.373966	0.0101511	0.233115	5	9070382	9073433	-1	atp5meb	ATP synthase membrane subunit eb [Source:NCBI gene;Acc:767750]	protein_coding	ENSDART00000099891
ENSDARG00000105033		2.86856		3.72203	95	3.33017	71	4.32731	86		1.22638	26	2.6284	50	1.97709	37		3.79317	1.94396	2.05457	1.03883	0.0101517	0.233115	1	34954697	35113974	-1		B- and T-lymphocyte attenuator-like [Source:NCBI gene;Acc:103910066]	protein_coding	ENSDART00000167461,ENSDART00000192811
ENSDARG00000019117		189.645		161.957	4155	170.584	3662	147.854	2955		205.361	4437	197.807	3800	254.307	4823		160.132	219.158	-1.36252	-0.446275	0.0101683	0.233164	25	5035343	5063523	1	parvb	parvin, beta [Source:ZFIN;Acc:ZDB-GENE-030131-4411]	protein_coding	ENSDART00000011751,ENSDART00000153980,ENSDART00000154700
ENSDARG00000042727		5.85411		7.61944	195	6.35761	136	7.17883	143		3.91054	84	4.97055	95	5.08772	96		7.05196	4.65627	1.53404	0.617338	0.0102058	0.233313	15	25084821	25094026	-1	exo5	exonuclease 5 [Source:NCBI gene;Acc:641427]	protein_coding	ENSDART00000062695,ENSDART00000129154,ENSDART00000142609
ENSDARG00000069242		35.2907		36.2654	930	40.8238	876	43.4982	869		32.4181	700	28.0276	538	30.7108	582		40.1958	30.3855	1.32018	0.400733	0.0102087	0.233313	9	37754845	37840350	1	pdia5	protein disulfide isomerase family A, member 5 [Source:ZFIN;Acc:ZDB-GENE-030521-5]	protein_coding	ENSDART00000100592
ENSDARG00000103251		55.1866		59.2991	1521	64.1117	1376	62.1081	1241		44.8208	968	50.7725	975	50.0072	948		61.8396	48.5335	1.27564	0.351216	0.0102181	0.233313	21	42717424	42780082	1	sh3pxd2b	SH3 and PX domains 2B [Source:ZFIN;Acc:ZDB-GENE-060810-52]	protein_coding	ENSDART00000160502,ENSDART00000166936,ENSDART00000172135
ENSDARG00000032206		12.9554		9.41225	241	11.807	253	8.72965	174		12.4721	269	17.2538	331	18.0574	342		9.98296	15.9278	-1.58029	-0.660193	0.0102489	0.233392	6	37389683	37403444	-1	cthl	cystathionase (cystathionine gamma-lyase), like [Source:ZFIN;Acc:ZDB-GENE-040905-3]	protein_coding	ENSDART00000136314
ENSDARG00000035652		43.4074		29.1721	748	36.4456	782	37.1948	743		45.9777	993	65.9704	1267	45.684	866		34.2709	52.544	-1.52055	-0.60459	0.0102939	0.233392	5	4332220	4342866	1	sat1a.1	spermidine/spermine N1-acetyltransferase 1a, duplicate 1 [Source:NCBI gene;Acc:565700]	protein_coding	ENSDART00000051699,ENSDART00000139409,ENSDART00000141866,ENSDART00000147691
ENSDARG00000079815		16.0986		13.8553	355	14.6015	313	12.7818	255		19.5064	421	16.6292	319	19.2173	364		13.7462	18.451	-1.34047	-0.42274	0.0103018	0.233392	10	4964463	4969208	1	lyrm7	LYR motif containing 7 [Source:NCBI gene;Acc:100002948]	protein_coding	ENSDART00000109882,ENSDART00000144284
ENSDARG00000055540		40.8082		40.8254	1047	28.9935	622	24.438	488		42.692	922	50.5122	970	57.3884	1088		31.419	50.1975	-1.61736	-0.693645	0.0103223	0.233392	11	34555036	34577106	-1	pfkfb4a	6-phosphofructo-2-kinase/fructose-2,6-biphosphatase 4a [Source:ZFIN;Acc:ZDB-GENE-051120-51]	protein_coding	ENSDART00000077883,ENSDART00000133302,ENSDART00000184367
ENSDARG00000019874		12.57		11.2051	287	8.91928	191	8.32944	166		12.1481	262	18.7111	359	16.1067	305		9.48459	15.6553	-1.61552	-0.691994	0.0103397	0.233392	15	31564137	31588162	-1	hsph1	heat shock 105/110 protein 1 [Source:ZFIN;Acc:ZDB-GENE-120410-4]	protein_coding	ENSDART00000153598,ENSDART00000155806
ENSDARG00000025420		7.56776		7.11278	182	5.75212	123	4.82757	96		10.4821	226	8.77002	168	8.46195	160		5.89749	9.23802	-1.56572	-0.646827	0.0103697	0.233392	9	28232522	28234444	1	fzd5	frizzled class receptor 5 [Source:ZFIN;Acc:ZDB-GENE-990415-218]	protein_coding	ENSDART00000031761
ENSDARG00000043313		186.815		164.607	4223	172.587	3705	151.256	3023		216.653	4681	193.747	3722	222.041	4211		162.817	210.814	-1.29447	-0.372363	0.0103711	0.233392	7	57886148	58130703	-1	ank2b	ankyrin 2b, neuronal [Source:ZFIN;Acc:ZDB-GENE-041010-165]	protein_coding	ENSDART00000043984,ENSDART00000138803,ENSDART00000142580,ENSDART00000145925,ENSDART00000147287,ENSDART00000172082
ENSDARG00000054814		52.9341		42.7741	1097	49.0677	1053	38.3454	766		56.7607	1226	56.1334	1078	74.5232	1413		43.3957	62.4724	-1.43396	-0.520007	0.0103974	0.233392	16	31453980	31505802	-1	ptp4a3b	protein tyrosine phosphatase 4A3b [Source:ZFIN;Acc:ZDB-GENE-030131-2635]	protein_coding	ENSDART00000145691,ENSDART00000147616,ENSDART00000182397
ENSDARG00000055857		31.2792		32.1342	824	38.7744	832	35.9442	718		27.7903	600	24.9048	478	28.1274	533		35.6176	26.9408	1.31901	0.399455	0.0104098	0.233392	9	33154841	33195586	1	dop1b	DOP1 leucine zipper like protein B [Source:ZFIN;Acc:ZDB-GENE-040426-1195]	protein_coding	ENSDART00000078256,ENSDART00000131910,ENSDART00000132465,ENSDART00000147046,ENSDART00000180786
ENSDARG00000060452		56.7424		49.5946	1272	50.1855	1077	43.3481	866		76.7067	1657	61.7025	1185	58.9173	1117		47.7094	65.7755	-1.37217	-0.456455	0.0104227	0.233392	12	37463513	37734973	-1	sdk2b	sidekick cell adhesion molecule 2b [Source:ZFIN;Acc:ZDB-GENE-030131-8203]	protein_coding	ENSDART00000085121,ENSDART00000140353
ENSDARG00000097572		1.17651		0.487176	12	0.535623	11	0.925493	18		2.33707	50	1.58745	30	1.18626	22		0.649431	1.70359	-2.70633	-1.43634	0.0104297	0.233392	6	51009981	51101834	-1	ptprt	protein tyrosine phosphatase receptor type T [Source:ZFIN;Acc:ZDB-GENE-101028-4]	protein_coding	ENSDART00000092493
ENSDARG00000069615		273.679		244.348	6269	189.447	4067	209.387	4185		353.591	7640	253.914	4878	391.385	7423		214.394	332.964	-1.53633	-0.619492	0.0104337	0.233392	10	3111004	3129887	1	ckmt2a	creatine kinase, mitochondrial 2a (sarcomeric) [Source:ZFIN;Acc:ZDB-GENE-030131-5717]	protein_coding	ENSDART00000101449,ENSDART00000168670,ENSDART00000185500,ENSDART00000193401
ENSDARG00000093977		2.59162		3.05947	78	3.14387	67	3.62693	72		1.68917	36	2.26407	43	1.7662	33		3.27676	1.90648	1.72568	0.787169	0.0104722	0.233392	18	30028135	30030949	1	si:ch211-220f16.1	si:ch211-220f16.1 [Source:ZFIN;Acc:ZDB-GENE-070912-198]	protein_coding	ENSDART00000136810,ENSDART00000139750,ENSDART00000140825,ENSDART00000145306
ENSDARG00000037804		27.3553		29.406	754	29.5524	634	36.1943	723		21.4964	464	25.9457	498	21.5371	408		31.7176	22.9931	1.37776	0.46232	0.0104767	0.233392	23	5756442	5759242	-1	phlda3	pleckstrin homology-like domain, family A, member 3 [Source:NCBI gene;Acc:368779]	protein_coding	ENSDART00000055087
ENSDARG00000019564		18.3774		21.3773	548	22.5194	483	22.8372	456		19.1825	414	12.9338	248	11.4144	216		22.2446	14.5102	1.55904	0.640658	0.0104878	0.233392	20	29634653	29675458	1	asap2b	ArfGAP with SH3 domain, ankyrin repeat and PH domain 2b [Source:ZFIN;Acc:ZDB-GENE-030131-5060]	protein_coding	ENSDART00000101556
ENSDARG00000014230		256.099		238.853	6128	217.905	4678	211.488	4227		305.415	6599	263.179	5056	299.753	5685		222.749	289.449	-1.29846	-0.376801	0.0104901	0.233392	17	52524355	52553447	1	dlst	dihydrolipoamide S-succinyltransferase [Source:ZFIN;Acc:ZDB-GENE-030326-1]	protein_coding	ENSDART00000016614,ENSDART00000135246,ENSDART00000135268,ENSDART00000145676
ENSDARG00000070425		43.3113		38.9546	999	35.9799	772	38.2954	765		46.1629	997	53.9474	1036	46.5276	882		37.7433	48.8793	-1.29221	-0.369846	0.0104982	0.233392	20	28245164	28257992	1	dll4	delta-like 4 (Drosophila) [Source:ZFIN;Acc:ZDB-GENE-041014-73]	protein_coding	ENSDART00000103320,ENSDART00000191703
ENSDARG00000063407		40.6933		45.7751	1174	52.7472	1132	44.7989	895		39.7764	859	27.7154	532	33.3469	632		47.7737	33.6129	1.43125	0.517279	0.0105028	0.233392	16	1254390	1321591	1		ADAMTS-like 4 [Source:NCBI gene;Acc:100333903]	protein_coding	ENSDART00000092627
ENSDARG00000073744		29.899		28.0419	719	25.8263	554	24.9883	499		32.557	703	34.95	671	33.0306	626		26.2855	33.5125	-1.27417	-0.349557	0.0105092	0.233392	22	39054012	39083156	1	ip6k1	inositol hexakisphosphate kinase 1 [Source:ZFIN;Acc:ZDB-GENE-110317-2]	protein_coding	ENSDART00000113362,ENSDART00000153547,ENSDART00000191326
ENSDARG00000075664		2.7204		1.38358	35	1.60687	34	1.62587	32		5.94679	128	3.09683	59	2.66248	50		1.53877	3.90204	-2.43736	-1.28532	0.0105249	0.233392	15	47867133	47874950	-1	si:ch1073-429i10.1	si:ch1073-429i10.1 [Source:ZFIN;Acc:ZDB-GENE-120215-259]	protein_coding	ENSDART00000151110,ENSDART00000151606
ENSDARG00000036106		10.5244		10.8153	277	12.5056	268	13.9324	278		8.86234	191	8.04136	154	8.98918	170		12.4178	8.63096	1.42314	0.509075	0.0105313	0.233392	2	6535865	6548838	-1	rgs18	regulator of G protein signaling 18 [Source:ZFIN;Acc:ZDB-GENE-061013-722]	protein_coding	ENSDART00000052419
ENSDARG00000074617		40.159		37.2787	956	36.0264	773	30.4913	609		47.5512	1027	42.3407	813	47.2657	896		34.5988	45.7192	-1.32351	-0.404364	0.0105392	0.233392	14	17329895	17351159	1	wfs1b	Wolfram syndrome 1b (wolframin) [Source:ZFIN;Acc:ZDB-GENE-050809-19]	protein_coding	ENSDART00000148789
ENSDARG00000031971		19.2722		20.0912	515	25.4537	546	22.3369	446		16.452	355	13.5584	260	17.7411	336		22.6273	15.9172	1.42045	0.506352	0.0106088	0.234326	9	27398323	27410659	-1	poglut2	protein O-glucosyltransferase 2 [Source:NCBI gene;Acc:393905]	protein_coding	ENSDART00000042297,ENSDART00000135652
ENSDARG00000032919		77.1042		68.0293	1745	69.4679	1491	57.4056	1147		101.836	2200	79.6589	1530	86.2276	1635		64.9676	89.2408	-1.37118	-0.45542	0.0106103	0.234326	4	15490215	15603588	-1	chchd3a	coiled-coil-helix-coiled-coil-helix domain containing 3a [Source:ZFIN;Acc:ZDB-GENE-030131-5005]	protein_coding	ENSDART00000122520,ENSDART00000143317,ENSDART00000162356
ENSDARG00000054172		36.2343		39.0716	1002	40.5909	871	42.5977	851		30.4744	658	29.9534	575	34.7177	658		40.7534	31.7152	1.28723	0.364272	0.0106944	0.23579	21	37436907	37441931	1	pgrmc1	progesterone receptor membrane component 1 [Source:ZFIN;Acc:ZDB-GENE-041114-91]	protein_coding	ENSDART00000076328,ENSDART00000182611
ENSDARG00000033616		57.3007		68.4191	1755	61.0843	1311	74.8149	1495		36.2593	783	49.1069	943	54.1196	1026		68.1061	46.4953	1.48124	0.566804	0.0107058	0.23579	17	24687338	24695198	1	selenon	selenoprotein N [Source:NCBI gene;Acc:352914]	protein_coding	ENSDART00000135794,ENSDART00000137713,ENSDART00000140653
ENSDARG00000004753		3.69749		8.282	212	6.45076	138	2.92656	58		1.96684	42	1.89974	36	0.659031	12		5.88644	1.50854	4.06016	2.02154	0.0107493	0.236427	6	13458257	13498745	-1	mylkb	myosin light chain kinase b [Source:ZFIN;Acc:ZDB-GENE-041111-150]	protein_coding	ENSDART00000027684,ENSDART00000172318,ENSDART00000189438
ENSDARG00000011724		24.6316		24.5342	629	26.851	576	39.346	786		19.9229	430	18.8673	362	18.2683	346		30.2437	19.0195	1.55068	0.632897	0.0107706	0.236573	13	39532050	39533365	1	marveld1	MARVEL domain containing 1 [Source:NCBI gene;Acc:497317]	protein_coding	ENSDART00000019379
ENSDARG00000045768		151.463		140.794	3612	134.208	2881	127.193	2542		162.831	3518	174.802	3358	168.949	3204		134.065	168.861	-1.26017	-0.333616	0.0108413	0.237654	4	12013043	12026507	1	cry1a	cryptochrome circadian regulator 1a [Source:ZFIN;Acc:ZDB-GENE-010426-2]	protein_coding	ENSDART00000067281,ENSDART00000130692
ENSDARG00000032405		56.1897		66.3145	1701	75.8488	1628	58.6062	1171		36.0279	778	48.0139	922	52.327	992		66.9232	45.4563	1.48304	0.56856	0.010855	0.237654	4	77975221	77979432	-1	ckap4	cytoskeleton associated protein 4 [Source:ZFIN;Acc:ZDB-GENE-040426-2417]	protein_coding	ENSDART00000049170
ENSDARG00000089327		2.24355		3.17639	81	2.81784	60	2.92656	58		1.87428	40	1.7436	33	0.922643	17		2.9736	1.51351	2.04421	1.03155	0.0108702	0.237654	10	29840725	29848513	1		cytotoxic and regulatory T-cell molecule [Source:NCBI gene;Acc:101884219]	protein_coding	ENSDART00000127268
ENSDARG00000100088		7.02031		10.5035	269	7.10282	152	8.77968	175		4.32705	93	6.53198	125	4.87683	92		8.79534	5.24528	1.70348	0.768485	0.0108786	0.237654	15	37022018	37104165	-1	zmp:0000001114	zmp:0000001114 [Source:ZFIN;Acc:ZDB-GENE-140106-74]	protein_coding	ENSDART00000165867
ENSDARG00000041041		26.8091		25.6255	657	36.9114	792	35.0937	701		17.285	373	23.0311	442	22.9079	434		32.5435	21.0747	1.53967	0.622624	0.0109207	0.238218	16	11818126	11825303	1	cxcr3.2	chemokine (C-X-C motif) receptor 3, tandem duplicate 2 [Source:NCBI gene;Acc:791973]	protein_coding	ENSDART00000145727
ENSDARG00000110135		9.59908		9.37328	240	10.596	227	21.3364	426		4.14193	89	6.53198	125	5.61494	106		13.7686	5.42962	2.38537	1.25422	0.0109634	0.238218	4	55779607	55779760	1			rRNA	ENSDART00000186299
ENSDARG00000111902		9.59908		9.37328	240	10.596	227	21.3364	426		4.14193	89	6.53198	125	5.61494	106		13.7686	5.42962	2.38537	1.25422	0.0109634	0.238218	7	5296	5449	1			rRNA	ENSDART00000187453
ENSDARG00000114355		9.59908		9.37328	240	10.596	227	21.3364	426		4.14193	89	6.53198	125	5.61494	106		13.7686	5.42962	2.38537	1.25422	0.0109634	0.238218	5	836137	836290	-1			rRNA	ENSDART00000180886
ENSDARG00000037679		22.0904		17.0902	438	20.6098	442	17.6344	352		25.9854	561	22.1463	425	29.0764	551		18.4448	25.736	-1.39309	-0.478287	0.0109815	0.238273	1	10683843	10696603	1	zgc:103678	zgc:103678 [Source:ZFIN;Acc:ZDB-GENE-040912-107]	protein_coding	ENSDART00000054879,ENSDART00000152438
ENSDARG00000092240		7.26779		6.52816	167	4.86718	104	5.27781	105		8.63095	186	7.52088	144	10.7817	204		5.55772	8.97786	-1.59388	-0.672539	0.0110099	0.238273	1	45351890	45366422	1	si:ch211-243a20.3	si:ch211-243a20.3 [Source:ZFIN;Acc:ZDB-GENE-061207-28]	protein_coding	ENSDART00000145486
ENSDARG00000103466		7.94471		8.74969	224	10.6892	229	11.3811	227		5.7154	123	3.40912	65	7.72384	146		10.2733	5.61612	1.90291	0.928211	0.0110101	0.238273	25	13048201	13050959	-1	ccl35.1	chemokine (C-C motif) ligand 35, duplicate 1 [Source:ZFIN;Acc:ZDB-GENE-081022-33]	protein_coding	ENSDART00000169041
ENSDARG00000092653		9.98092		10.8543	278	13.4837	289	11.5812	231		6.3633	137	8.61388	165	8.98918	170		11.9731	7.98879	1.5155	0.599794	0.011066	0.238574	1	29653947	29658721	-1	si:dkey-1h24.6	si:dkey-1h24.6 [Source:ZFIN;Acc:ZDB-GENE-100922-103]	protein_coding	ENSDART00000132063
ENSDARG00000100624		9.89622		6.80098	174	9.94395	213	6.62853	132		13.0737	282	12.5175	240	10.4127	197		7.79116	12.0013	-1.56922	-0.650045	0.0110758	0.238574	4	75138640	75158035	-1		si:cabz01066312.1 [Source:NCBI gene;Acc:100537698]	protein_coding	ENSDART00000174088,ENSDART00000174127,ENSDART00000174353
ENSDARG00000104089		7.04674		7.93123	203	8.73298	187	8.07931	161		5.48401	118	5.64717	108	6.40578	121		8.24784	5.84565	1.4141	0.499888	0.0110872	0.238574	19	18423378	18492557	-1	p3h4	prolyl 3-hydroxylase family member 4 (inactive) [Source:ZFIN;Acc:ZDB-GENE-030131-1599]	protein_coding	ENSDART00000157916,ENSDART00000169489
ENSDARG00000016573		36.798		41.2931	1059	44.8759	963	40.9969	819		26.4482	571	36.1471	694	31.0272	588		42.3886	31.2075	1.36989	0.454056	0.0110957	0.238574	16	31258283	31351419	-1	mroh1	maestro heat-like repeat family member 1 [Source:ZFIN;Acc:ZDB-GENE-090806-2]	protein_coding	ENSDART00000018091,ENSDART00000136648,ENSDART00000142638,ENSDART00000178298
ENSDARG00000070670		250.326		272.098	6981	252.185	5414	377.376	7543		209.063	4517	213.057	4093	178.176	3379		300.553	200.099	1.48361	0.569108	0.0111004	0.238574	17	37445525	37474689	-1	crip2	cysteine-rich protein 2 [Source:ZFIN;Acc:ZDB-GENE-040426-2889]	protein_coding	ENSDART00000103980
ENSDARG00000029019		162.468		244.348	6269	177.198	3804	185.674	3711		91.7935	1983	162.258	3117	113.538	2153		202.407	122.53	1.68087	0.749205	0.0111126	0.238574	16	26449615	26488169	1	epb41b	erythrocyte membrane protein band 4.1b [Source:ZFIN;Acc:ZDB-GENE-030130-1]	protein_coding	ENSDART00000039746,ENSDART00000136027
ENSDARG00000062058		307.903		285.583	7327	264.667	5682	226.846	4534		408.2	8820	326.937	6281	335.183	6357		259.032	356.773	-1.3767	-0.461212	0.0111558	0.238735	24	39778648	39885785	-1	slc12a7b	solute carrier family 12 member 7b [Source:ZFIN;Acc:ZDB-GENE-030829-61]	protein_coding	ENSDART00000089232,ENSDART00000134251,ENSDART00000143476
ENSDARG00000075567		4.05436		2.8646	73	3.33017	71	3.47685	69		4.651	100	5.12669	98	4.87683	92		3.22388	4.88484	-1.52728	-0.610962	0.0111611	0.238735	19	4828251	4851411	-1	fbxl20	F-box and leucine-rich repeat protein 20 [Source:ZFIN;Acc:ZDB-GENE-081031-27]	protein_coding	ENSDART00000110398,ENSDART00000139821,ENSDART00000193855
ENSDARG00000075641		2.96869		4.42356	113	3.00414	64	4.22725	84		1.55033	33	2.52431	48	2.08254	39		3.88499	2.05239	1.92886	0.947751	0.0111644	0.238735	9	890536	899861	1	steap3	STEAP family member 3, metalloreductase [Source:ZFIN;Acc:ZDB-GENE-081104-268]	protein_coding	ENSDART00000139132
ENSDARG00000058285		130.893		120.177	3083	114.879	2466	87.8718	1756		148.624	3211	138.056	2652	175.75	3333		107.643	154.143	-1.43813	-0.524192	0.0112023	0.23923	18	8340886	8367566	1	cpt1b	carnitine palmitoyltransferase 1B (muscle) [Source:ZFIN;Acc:ZDB-GENE-041010-9]	protein_coding	ENSDART00000081132,ENSDART00000083421
ENSDARG00000041150		1.48469		1.96819	50	1.83975	39	2.42629	48		0.532203	11	1.5354	29	0.606308	11		2.07808	0.891305	2.62037	1.38977	0.0112969	0.240637	7	32811907	32833255	-1	slc17a6b	solute carrier family 17 member 6b [Source:NCBI gene;Acc:100149756]	protein_coding	ENSDART00000099871,ENSDART00000099872
ENSDARG00000078854		13.5216		17.0122	436	15.0207	322	16.6839	333		9.69536	209	8.61388	165	14.1033	267		16.2389	10.8042	1.54163	0.624458	0.011298	0.240637	1	16073887	16220235	1	tusc3	tumor suppressor candidate 3 [Source:ZFIN;Acc:ZDB-GENE-050522-381]	protein_coding	ENSDART00000054707,ENSDART00000122503,ENSDART00000160270
ENSDARG00000010149		2019.04		1832.74	47024	1740.84	37376	1640.55	32793		2445.52	52843	2016.82	38749	2437.75	46237		1738.04	2300.03	-1.31948	-0.399974	0.0113265	0.240928	21	5080789	5092539	1	atp5fa1	ATP synthase F1 subunit alpha [Source:ZFIN;Acc:ZDB-GENE-060201-1]	protein_coding	ENSDART00000024199,ENSDART00000130030
ENSDARG00000019355		12.0476		11.0881	284	9.15216	196	9.83024	196		13.0737	282	13.2982	255	15.8431	300		10.0235	14.0717	-1.39424	-0.479483	0.0113509	0.241128	20	16163142	16171297	-1	coa7	cytochrome c oxidase assembly factor 7 [Source:NCBI gene;Acc:555268]	protein_coding	ENSDART00000012476
ENSDARG00000069734		453.312		566.391	14532	348.225	7476	999.058	19970		261.034	5640	250.948	4821	294.218	5580		637.891	268.733	2.17093	1.11831	0.0113801	0.241432	3	55091230	55092051	-1	hbba2	hemoglobin, beta adult 2 [Source:ZFIN;Acc:ZDB-GENE-040801-164]	protein_coding	ENSDART00000053077
ENSDARG00000012600		21.6199		27.1844	697	22.7057	487	24.9383	498		20.8485	450	17.514	336	16.5285	313		24.9428	18.297	1.36461	0.448486	0.0114097	0.241566	2	41949186	41964402	-1	si:dkey-97a13.6	si:dkey-97a13.6 [Source:ZFIN;Acc:ZDB-GENE-070912-617]	protein_coding	ENSDART00000131278
ENSDARG00000098972		18.0384		16.0768	412	15.1604	325	14.1325	282		24.4119	527	19.2316	369	19.2173	364		15.1233	20.9536	-1.37842	-0.463012	0.0114163	0.241566	11	41216191	41222971	-1	mrps16	mitochondrial ribosomal protein S16 [Source:ZFIN;Acc:ZDB-GENE-041010-123]	protein_coding	ENSDART00000163609,ENSDART00000192895
ENSDARG00000032820		1.62433		2.27999	58	1.88632	40	2.82651	56		1.55033	33	0.75469	14	0.448141	8		2.33094	0.917721	2.78467	1.47751	0.0115248	0.242681	10	33744098	33867426	1	rxfp2a	relaxin family peptide receptor 2a [Source:ZFIN;Acc:ZDB-GENE-040426-1225]	protein_coding	ENSDART00000147775,ENSDART00000153442
ENSDARG00000088567		8.4042		8.55482	219	5.84527	125	4.82757	96		10.3433	223	9.96712	191	10.8872	206		6.40922	10.3992	-1.63704	-0.711091	0.0115264	0.242681	16	29630965	29647738	1	vps72b	vacuolar protein sorting 72 homolog b [Source:ZFIN;Acc:ZDB-GENE-100922-13]	protein_coding	ENSDART00000127323,ENSDART00000153683,ENSDART00000185820,ENSDART00000186713,ENSDART00000192105
ENSDARG00000076248		6.28566		3.83895	98	4.49457	96	5.07771	101		10.8986	235	7.15655	137	6.24761	118		4.47041	8.10092	-1.8068	-0.853439	0.0115446	0.242681	11	1409622	1412356	1	ppp1r3db	protein phosphatase 1, regulatory subunit 3Db [Source:ZFIN;Acc:ZDB-GENE-110201-1]	protein_coding	ENSDART00000157042
ENSDARG00000089227		11.0062		13.1927	338	11.7604	252	12.8819	257		9.23257	199	8.92617	171	10.0436	190		12.6117	9.40079	1.34411	0.426648	0.0115516	0.242681	25	27629006	27665978	-1	si:ch211-91p5.3	si:ch211-91p5.3 [Source:ZFIN;Acc:ZDB-GENE-131119-65]	protein_coding	ENSDART00000123590
ENSDARG00000002523		227.699		194.266	4984	198.39	4259	168.365	3365		232.064	5014	246.888	4743	326.22	6187		187.007	268.391	-1.42306	-0.508996	0.0115541	0.242681	10	11260170	11283239	1	hsdl2	hydroxysteroid dehydrogenase like 2 [Source:NCBI gene;Acc:322347]	protein_coding	ENSDART00000038888,ENSDART00000155333,ENSDART00000155742
ENSDARG00000095424		1.07368		1.92922	49	1.65344	35	1.1256	22		0.94871	20	0.442405	8	0.342696	6		1.56942	0.577937	2.92124	1.54658	0.0115591	0.242681	19	3290098	3298352	-1	si:ch211-133n4.7	si:ch211-133n4.7 [Source:ZFIN;Acc:ZDB-GENE-060503-665]	protein_coding	ENSDART00000147182
ENSDARG00000100633		26.0829		31.0429	796	28.4346	610	29.4407	588		21.3576	461	25.6335	492	20.5881	390		29.6394	22.5264	1.32236	0.403114	0.0115993	0.243066	10	6383270	6409781	1	zgc:114200	zgc:114200 [Source:ZFIN;Acc:ZDB-GENE-050913-96]	protein_coding	ENSDART00000170548
ENSDARG00000089581		27.084		23.9496	614	23.1249	496	24.0378	480		28.7158	620	29.3288	563	33.3469	632		23.7041	30.4639	-1.28174	-0.358099	0.0116075	0.243066	12	30458409	30500803	-1	nhlrc2	NHL repeat containing 2 [Source:ZFIN;Acc:ZDB-GENE-100318-2]	protein_coding	ENSDART00000153108
ENSDARG00000011837		7.81257		6.76201	173	6.68364	143	6.22832	124		9.64908	208	8.45774	162	9.09462	172		6.55799	9.06715	-1.38083	-0.465533	0.0116566	0.243527	13	12761707	12778947	1	zgc:100846	zgc:100846 [Source:ZFIN;Acc:ZDB-GENE-040801-47]	protein_coding	ENSDART00000015127
ENSDARG00000099989		14.9063		11.2051	287	14.9276	320	7.22885	144		18.442	398	16.9935	326	20.6408	391		11.1205	18.6921	-1.73489	-0.794843	0.0116596	0.243527	11	37275448	37298938	1	creld1a	cysteine-rich with EGF-like domains 1a [Source:ZFIN;Acc:ZDB-GENE-120111-4]	protein_coding	ENSDART00000161423,ENSDART00000188946
ENSDARG00000017429		18.5124		13.8553	355	18.7002	401	12.3816	247		24.3194	525	19.648	377	22.1698	420		14.979	22.0457	-1.49069	-0.575985	0.0117346	0.244388	18	46395909	46464501	-1	sphkap	SPHK1 interactor, AKAP domain containing [Source:NCBI gene;Acc:100034387]	protein_coding	ENSDART00000040669
ENSDARG00000057767		15.9688		13.8553	355	9.94395	213	11.281	225		18.9511	409	26.5183	509	15.2631	289		11.6934	20.2442	-1.69089	-0.757786	0.0117518	0.244388	18	15795566	15837342	1	nudt4a	nudix (nucleoside diphosphate linked moiety X)-type motif 4a [Source:ZFIN;Acc:ZDB-GENE-031010-33]	protein_coding	ENSDART00000099944,ENSDART00000137681,ENSDART00000147024
ENSDARG00000030364		69.2513		50.6858	1300	60.7117	1303	55.4546	1108		104.15	2250	69.6137	1337	74.8922	1420		55.6174	82.8853	-1.4707	-0.556506	0.0117578	0.244388	19	46812272	46957968	-1	angpt1	angiopoietin 1 [Source:ZFIN;Acc:ZDB-GENE-010817-1]	protein_coding	ENSDART00000043713
ENSDARG00000006290		97.3149		86.7369	2225	85.4434	1834	77.1661	1542		126.502	2733	97.7715	1878	110.269	2091		83.1155	111.514	-1.336	-0.417919	0.0117714	0.244388	19	35357196	35361556	-1	ndufs5	NADH:ubiquinone oxidoreductase subunit S5 [Source:ZFIN;Acc:ZDB-GENE-050522-437]	protein_coding	ENSDART00000012167
ENSDARG00000041691		29.8213		38.2531	981	34.6757	744	32.8925	657		23.255	502	30.3177	582	19.5337	370		35.2738	24.3688	1.46978	0.555598	0.0117765	0.244388	18	16125852	16130165	1	bhlhe41	basic helix-loop-helix family, member e41 [Source:ZFIN;Acc:ZDB-GENE-050419-146]	protein_coding	ENSDART00000061106
ENSDARG00000095304		7.2552		9.80199	251	6.82337	146	11.3811	227		4.0031	86	5.95945	114	5.56222	105		9.33547	5.17492	1.8029	0.850323	0.0118025	0.244613	5	42271810	42272550	-1	si:ch211-207c6.2	si:ch211-207c6.2 [Source:ZFIN;Acc:ZDB-GENE-060526-90]	protein_coding	ENSDART00000137692,ENSDART00000164363
ENSDARG00000070824		152.665		140.053	3593	127.781	2743	124.391	2486		178.288	3852	151.693	2914	193.781	3675		130.742	174.587	-1.33037	-0.411828	0.011844	0.24484	6	29402997	29410091	1	ndufb5	NADH:ubiquinone oxidoreductase subunit B5 [Source:ZFIN;Acc:ZDB-GENE-011010-1]	protein_coding	ENSDART00000104298
ENSDARG00000028327		65.828		77.578	1990	72.5885	1558	77.8165	1555		45.9315	992	56.7059	1089	64.3477	1220		75.9943	55.6617	1.37786	0.462426	0.0118497	0.24484	13	36585399	36593618	1	gmfb	glia maturation factor, beta [Source:ZFIN;Acc:ZDB-GENE-040426-2114]	protein_coding	ENSDART00000030211,ENSDART00000138940
ENSDARG00000100284		4.08227		7.03483	180	4.16854	89	4.82757	96		3.1238	67	2.99274	57	2.34615	44		5.34365	2.8209	1.88315	0.913146	0.0118728	0.24484	KZ116034.1	26611	31916	-1	cd247	CD247 molecule [Source:NCBI gene;Acc:100101654]	protein_coding	ENSDART00000170670
ENSDARG00000094112		29.579		31.0819	797	34.3963	738	45.8494	916		15.8504	342	28.5481	548	21.748	412		37.1092	22.0488	1.71289	0.776436	0.01188	0.24484	21	45904956	45922066	1	slc22a21	solute carrier family 22 member 21 [Source:ZFIN;Acc:ZDB-GENE-091118-62]	protein_coding	ENSDART00000135034,ENSDART00000159841,ENSDART00000188242
ENSDARG00000045144		15.7806		23.326	598	13.9961	300	22.537	450		10.1119	218	13.2982	255	11.4144	216		19.953	11.6081	1.69594	0.762087	0.0118897	0.24484	12	20336070	20337274	1	zgc:163057	zgc:163057 [Source:ZFIN;Acc:ZDB-GENE-070410-131]	protein_coding	ENSDART00000066385
ENSDARG00000063911		13511.3		12445.1	319316	10933.1	234736	10281.3	205515		17313.9	374124	13042.6	250590	17051.8	323426		11219.8	15802.8	-1.40155	-0.487022	0.0119537	0.24484	MT	9052	9735	1	mt-atp6	ATP synthase 6 [Source:NCBI gene;Acc:140519]	protein_coding	ENSDART00000093612
ENSDARG00000056156		115.327		106.536	2733	85.5366	1836	104.481	2088		138.257	2987	119.996	2305	137.157	2601		98.851	131.803	-1.33704	-0.419038	0.0119626	0.24484	5	28870372	28915130	-1	npdc1b	neural proliferation, differentiation and control, 1b [Source:ZFIN;Acc:ZDB-GENE-140106-58]	protein_coding	ENSDART00000078592
ENSDARG00000070498		1.35193		2.43588	62	1.51372	32	1.876	37		0.347089	7	0.910833	17	1.02809	19		1.94187	0.762003	2.86103	1.51654	0.0119687	0.24484	12	7445595	7513794	1	phyhiplb	phytanoyl-CoA 2-hydroxylase interacting protein-like b [Source:NCBI gene;Acc:100004913]	protein_coding	ENSDART00000103536,ENSDART00000134608,ENSDART00000152524,ENSDART00000152564
ENSDARG00000100383		17.6786		17.7137	454	21.8208	468	23.6876	473		11.7316	253	15.3801	295	15.7377	298		21.0741	14.2831	1.47765	0.563302	0.0119696	0.24484	15	12377887	12388434	1	il10ra	interleukin 10 receptor, alpha [Source:ZFIN;Acc:ZDB-GENE-070905-4]	protein_coding	ENSDART00000170769
ENSDARG00000104678		8.69772		6.13842	157	7.56858	162	7.22885	144		8.67723	187	11.5806	222	10.9926	208		6.97862	10.4168	-1.48921	-0.574548	0.0119893	0.24484	4	77092909	77108450	1		zinc finger protein OZF-like [Source:NCBI gene;Acc:110437726]	protein_coding	ENSDART00000163676
ENSDARG00000061301		22.504		24.1055	618	24.3359	522	29.7909	595		21.2187	458	17.4099	334	18.1629	344		26.0774	18.9305	1.37058	0.454783	0.0120109	0.24484	7	24196575	24204665	-1	gmpr2	guanosine monophosphate reductase 2 [Source:ZFIN;Acc:ZDB-GENE-030131-1238]	protein_coding	ENSDART00000087298,ENSDART00000167141
ENSDARG00000036650		23.3215		20.7147	531	18.5139	397	21.9367	438		25.8466	558	25.6335	492	27.2839	517		20.3884	26.2546	-1.29054	-0.367972	0.0120225	0.24484	1	46617006	46632966	-1	cdadc1	cytidine and dCMP deaminase domain containing 1 [Source:NCBI gene;Acc:492807]	protein_coding	ENSDART00000053232,ENSDART00000133205,ENSDART00000148893
ENSDARG00000056609		14.9607		12.6861	325	13.018	279	13.4822	269		17.5164	378	15.9005	305	17.1612	325		13.0621	16.8594	-1.29263	-0.37031	0.0120264	0.24484	12	17436904	17456083	1	atad1b	ATPase family AAA domain containing 1b [Source:NCBI gene;Acc:368412]	protein_coding	ENSDART00000079130,ENSDART00000189257
ENSDARG00000038859		0.946166		1.18871	30	1.23426	26	1.42576	28		0.624761	13	0.702643	13	0.500863	9		1.28291	0.609422	2.10505	1.07385	0.0120269	0.24484	2	30752501	30784502	-1	rgs20	regulator of G protein signaling 20 [Source:ZFIN;Acc:ZDB-GENE-040718-128]	protein_coding	ENSDART00000056735,ENSDART00000131230,ENSDART00000147355,ENSDART00000182523
ENSDARG00000103712		29.4111		27.847	714	22.5194	483	18.8851	377		43.3861	937	33.909	651	29.92	567		23.0838	35.7384	-1.54367	-0.626366	0.0120406	0.24484	5	64368770	64378781	1	plpp7a	phospholipid phosphatase 7a (inactive) [Source:NCBI gene;Acc:402958]	protein_coding	ENSDART00000162246
ENSDARG00000076075		442.157		363.336	9322	434.576	9330	266.767	5332		528.061	11410	573.174	11012	487.024	9237		354.893	529.42	-1.51856	-0.602702	0.0120842	0.245419	11	25181886	25213689	-1	myh7ba	myosin, heavy chain 7B, cardiac muscle, beta a [Source:ZFIN;Acc:ZDB-GENE-100914-2]	protein_coding	ENSDART00000097316,ENSDART00000152186,ENSDART00000152551
ENSDARG00000070491		1.34996		1.6564	42	1.70002	36	2.07611	41		1.04127	22	0.650595	12	0.975365	18		1.81084	0.889076	2.0453	1.03231	0.0121188	0.245423	19	30517311	30565122	-1	hpcal4	hippocalcin like 4 [Source:ZFIN;Acc:ZDB-GENE-060503-307]	protein_coding	ENSDART00000103506,ENSDART00000171006,ENSDART00000185650
ENSDARG00000101146		13.6307		19.0389	488	12.7385	273	20.8861	417		6.87237	148	12.2572	235	9.9909	189		17.5545	9.70683	1.83672	0.877133	0.012131	0.245423	11	45187798	45199251	-1		Fc receptor-like protein 5 [Source:NCBI gene;Acc:101886098]	protein_coding	ENSDART00000158028
ENSDARG00000045863		17.5569		9.76302	250	15.207	326	13.6823	273		25.245	545	15.9526	306	25.4913	483		12.8841	22.2296	-1.73567	-0.795493	0.012152	0.245423	4	4120570	4129187	-1	asb15b	ankyrin repeat and SOCS box containing 15b [Source:ZFIN;Acc:ZDB-GENE-041210-265]	protein_coding	ENSDART00000146889
ENSDARG00000022101		38.9068		36.7721	943	34.536	741	27.4897	549		41.4887	896	45.2034	868	47.9511	909		32.9326	44.8811	-1.3685	-0.452594	0.0121749	0.245423	24	35933869	36002202	1	obscnb	obscurin, cytoskeletal calmodulin and titin-interacting RhoGEF b [Source:ZFIN;Acc:ZDB-GENE-070119-5]	protein_coding	ENSDART00000157373,ENSDART00000173058,ENSDART00000173322,ENSDART00000173406
ENSDARG00000069280		146.513		146.328	3754	89.449	1920	93.0246	1859		149.549	3231	228.931	4398	171.796	3258		109.601	183.426	-1.69112	-0.757982	0.0122028	0.245423	2	9946121	9957805	1	tsen15	TSEN15 tRNA splicing endonuclease subunit [Source:ZFIN;Acc:ZDB-GENE-041008-211]	protein_coding	ENSDART00000100696
ENSDARG00000007264		78.1816		70.6406	1812	71.0049	1524	62.4583	1248		89.2482	1928	80.2835	1542	95.454	1810		68.0346	88.3285	-1.2973	-0.375513	0.0122036	0.245423	15	404891	413541	1	nipsnap2		protein_coding	ENSDART00000155682
ENSDARG00000099974		786.589		668.153	17143	738.204	15849	639.216	12777		878.066	18973	816.497	15687	979.399	18576		681.858	891.321	-1.30594	-0.385088	0.0122051	0.245423	12	26023948	26064562	-1	ldb3b	LIM domain binding 3b [Source:ZFIN;Acc:ZDB-GENE-030131-6032]	protein_coding	ENSDART00000158215,ENSDART00000168825,ENSDART00000170265,ENSDART00000171135,ENSDART00000171206,ENSDART00000171212,ENSDART00000182956,ENSDART00000186779
ENSDARG00000024047		30.2832		23.7937	610	27.9688	600	20.5359	410		33.2511	718	31.0985	597	45.0513	854		24.0995	36.467	-1.50259	-0.587456	0.0122059	0.245423	11	7158723	7179516	1	tmem38a	transmembrane protein 38A [Source:NCBI gene;Acc:393874]	protein_coding	ENSDART00000035560
ENSDARG00000023963		8369.11		7383.12	189436	7850.25	168547	6363.82	127208		10388.3	224473	8910.79	171204	9318.4	176744		7199.06	9539.17	-1.32737	-0.408575	0.0122462	0.245927	22	15577827	15602760	-1	tpm4a	tropomyosin 4a [Source:ZFIN;Acc:ZDB-GENE-040426-2185]	protein_coding	ENSDART00000009054,ENSDART00000036075,ENSDART00000123125,ENSDART00000138978,ENSDART00000142717
ENSDARG00000001929		143.105		126.685	3250	134.395	2885	112.335	2245		166.395	3595	170.118	3268	148.704	2820		124.472	161.739	-1.3008	-0.3794	0.0122993	0.24645	23	37466967	37480785	1	pink1	PTEN induced kinase 1 [Source:ZFIN;Acc:ZDB-GENE-041212-53]	protein_coding	ENSDART00000006436
ENSDARG00000030913		101.398		92.544	2374	90.1476	1935	79.7175	1593		127.15	2747	115.468	2218	103.362	1960		87.4697	115.327	-1.31653	-0.396743	0.0123027	0.24645	15	25321572	25367309	-1	cluha	clustered mitochondria (cluA/CLU1) homolog a [Source:NCBI gene;Acc:562666]	protein_coding	ENSDART00000047471,ENSDART00000152137,ENSDART00000152651,ENSDART00000152754
ENSDARG00000041980		5.34285		5.51484	141	6.86994	147	7.8792	157		2.93869	63	4.29393	82	4.56049	86		6.75466	3.93104	1.72629	0.787679	0.0123495	0.246933	16	32226664	32233463	-1	calhm6	calcium homeostasis modulator family member 6 [Source:ZFIN;Acc:ZDB-GENE-061201-60]	protein_coding	ENSDART00000102016
ENSDARG00000039411		12.085		10.4256	267	10.5494	226	10.5306	210		13.4439	290	13.2461	254	14.3141	271		10.5019	13.6681	-1.30056	-0.379135	0.0123816	0.246933	13	24421515	24429095	-1	cep68	centrosomal protein 68 [Source:ZFIN;Acc:ZDB-GENE-030616-565]	protein_coding	ENSDART00000057588,ENSDART00000147514
ENSDARG00000010936		34.5059		24.9629	640	35.3744	759	23.7877	475		40.5169	875	45.6197	876	36.7739	697		28.0417	40.9702	-1.47961	-0.565213	0.0123904	0.246933	16	28629242	28658341	-1	abcb4	ATP-binding cassette, sub-family B (MDR/TAP), member 4 [Source:ZFIN;Acc:ZDB-GENE-080204-52]	protein_coding	ENSDART00000148456
ENSDARG00000078866		196.046		175.559	4504	185.535	3983	157.409	3146		214.709	4639	224.768	4318	218.297	4140		172.834	219.258	-1.27136	-0.346376	0.0124093	0.246933	3	40978997	41292569	-1	sdk1a	sidekick cell adhesion molecule 1a [Source:ZFIN;Acc:ZDB-GENE-081104-374]	protein_coding	ENSDART00000111856,ENSDART00000144088
ENSDARG00000110040		13.0839		11.361	291	9.8508	211	11.0809	221		12.8886	278	16.1608	310	17.1612	325		10.7642	15.4035	-1.4155	-0.501315	0.0124181	0.246933	20	1996202	2035120	1			protein_coding	ENSDART00000184143
ENSDARG00000009313		76.11		80.7349	2071	85.3037	1831	91.974	1838		58.982	1274	68.833	1322	70.8326	1343		86.0042	66.2159	1.30121	0.379859	0.0124256	0.246933	3	25121156	25133244	1	napsa	napsin A aspartic peptidase [Source:ZFIN;Acc:ZDB-GENE-030131-8690]	protein_coding	ENSDART00000025724,ENSDART00000146896
ENSDARG00000075468		36.5148		41.7997	1072	37.4237	803	47.4003	947		30.3356	655	34.8459	669	27.2839	517		42.2079	30.8218	1.3696	0.453751	0.0124337	0.246933	23	39632397	39666658	-1	vwa1	von Willebrand factor A domain containing 1 [Source:ZFIN;Acc:ZDB-GENE-030131-5921]	protein_coding	ENSDART00000110868,ENSDART00000133107,ENSDART00000144439,ENSDART00000190961
ENSDARG00000069113		9.77016		11.1661	286	11.2946	242	12.0814	241		6.59469	142	9.65483	185	7.82928	148		11.5141	8.02627	1.45652	0.542529	0.0124756	0.24746	21	36801620	36972127	-1	dbn1	drebrin 1 [Source:ZFIN;Acc:ZDB-GENE-091204-284]	protein_coding	ENSDART00000100310
ENSDARG00000102211		2.46445		1.30563	33	2.16578	46	1.67589	33		3.30892	71	3.77345	72	2.55704	48		1.71577	3.21314	-1.91564	-0.937828	0.0125051	0.247741	12	10631266	10637172	1	csf3a	colony stimulating factor 3 (granulocyte) a [Source:ZFIN;Acc:ZDB-GENE-091229-1]	protein_coding	ENSDART00000161455
ENSDARG00000036147		54.7958		72.7062	1865	52.2348	1121	70.5626	1410		37.5551	811	46.8689	900	48.8473	926		65.1679	44.4238	1.46127	0.547225	0.0125339	0.247792	7	32834142	32895668	-1	ano5b	anoctamin 5b [Source:ZFIN;Acc:ZDB-GENE-061215-108]	protein_coding	ENSDART00000132504,ENSDART00000141828,ENSDART00000143076
ENSDARG00000045947		68.9721		59.6499	1530	67.1857	1442	52.2028	1043		81.9825	1771	75.5471	1451	77.2647	1465		59.6795	78.2648	-1.31754	-0.397843	0.0125383	0.247792	12	4377624	4388704	-1	hrc	histidine rich calcium binding protein [Source:ZFIN;Acc:ZDB-GENE-041008-189]	protein_coding	ENSDART00000152168
ENSDARG00000095432		43.4457		38.0193	975	39.8922	856	31.2917	625		54.8632	1185	43.1735	829	53.4342	1013		36.4011	50.4903	-1.38604	-0.470965	0.0125706	0.248127	24	1370627	1398851	1			lincRNA	ENSDART00000143875
ENSDARG00000104047		22.8825		33.5372	860	23.7304	509	26.5391	530		18.0255	389	21.834	419	13.6288	258		27.9356	17.8294	1.58134	0.661146	0.0126399	0.249191	11	14280598	14293026	1	si:ch211-262i1.3	si:ch211-262i1.3 [Source:ZFIN;Acc:ZDB-GENE-141222-7]	protein_coding	ENSDART00000161597,ENSDART00000163033,ENSDART00000163729,ENSDART00000166236,ENSDART00000180903,ENSDART00000193664
ENSDARG00000071090		4821.93		4136.46	106133	4542.34	97525	3471.68	69396		6332.78	136840	5387.11	103503	5061.22	95997		4050.16	5593.71	-1.3833	-0.468118	0.0126592	0.249268	17	20122019	20143946	-1	actn2b	actinin, alpha 2b [Source:ZFIN;Acc:ZDB-GENE-051127-39]	protein_coding	ENSDART00000133327,ENSDART00000138911
ENSDARG00000059235		0.95381		0.759995	19	0.11644	2	0.475253	9		1.22638	26	1.43131	27	1.71348	32		0.450563	1.45706	-4.02257	-2.00812	0.0127095	0.249953	10	5135842	5147582	1	zgc:113274	zgc:113274 [Source:ZFIN;Acc:ZDB-GENE-050508-2]	protein_coding	ENSDART00000082295,ENSDART00000132627,ENSDART00000162434
ENSDARG00000007825		74.3552		70.4847	1808	56.0541	1203	66.6605	1332		88.7854	1918	79.6589	1530	84.4877	1602		64.3998	84.3107	-1.31404	-0.394004	0.0127542	0.250108	18	19419120	19451165	1	map2k1	mitogen-activated protein kinase kinase 1 [Source:ZFIN;Acc:ZDB-GENE-040426-2759]	protein_coding	ENSDART00000025107
ENSDARG00000074527		23.9625		25.7034	659	26.1989	562	31.7419	634		16.9148	365	21.6258	415	21.5898	409		27.8814	20.0435	1.39508	0.480353	0.0127564	0.250108	17	21514777	21563774	1	chst15	carbohydrate (N-acetylgalactosamine 4-sulfate 6-O) sulfotransferase 15 [Source:ZFIN;Acc:ZDB-GENE-131127-327]	protein_coding	ENSDART00000154633,ENSDART00000182387
ENSDARG00000076566		83.4016		78.5523	2015	67.1857	1442	68.1613	1362		108.037	2334	84.8116	1629	93.6614	1776		71.2998	95.5034	-1.3362	-0.418134	0.0127637	0.250108	8	47758621	47823318	-1	kank3	KN motif and ankyrin repeat domains 3 [Source:ZFIN;Acc:ZDB-GENE-081105-185]	protein_coding	ENSDART00000115050,ENSDART00000133669,ENSDART00000137149,ENSDART00000143821,ENSDART00000146775,ENSDART00000147349
ENSDARG00000031968		8.19944		8.63277	221	9.75765	209	10.4806	209		7.33515	158	6.53198	125	6.4585	122		9.62367	6.77521	1.40659	0.492206	0.0128218	0.25094	12	19866865	19932623	1	cpped1	calcineurin-like phosphoesterase domain containing 1 [Source:NCBI gene;Acc:492772]	protein_coding	ENSDART00000045609,ENSDART00000153093,ENSDART00000153392
ENSDARG00000076950		11.1592		14.5568	373	11.3412	243	14.933	298		7.6591	165	11.2683	216	7.19661	136		13.6103	8.70801	1.58915	0.668258	0.012846	0.251047	16	17263027	17300030	-1	kel	Kell metallo-endopeptidase (Kell blood group) [Source:ZFIN;Acc:ZDB-GENE-110411-118]	protein_coding	ENSDART00000149267
ENSDARG00000015947		51.877		80.7739	2072	90.4271	1941	41.197	823		44.3117	957	25.5814	491	28.971	549		70.7993	32.9547	2.0871	1.0615	0.0128583	0.251047	6	52790049	52846194	1	matn4	matrilin 4 [Source:ZFIN;Acc:ZDB-GENE-050208-64]	protein_coding	ENSDART00000002571,ENSDART00000065681
ENSDARG00000103358		7.67918		12.1404	311	7.05624	151	10.9308	218		6.73353	145	5.0226	96	4.19143	79		10.0425	5.31585	1.87311	0.905436	0.0129061	0.251124	6	39524924	39525505	-1			TEC	ENSDART00000160151
ENSDARG00000078859		1.55629		3.761	96	1.79317	38	1.72592	34		0.161975	3	0.182167	3	1.71348	32		2.4267	0.685874	6.47357	2.69456	0.0129181	0.251124	23	39606108	39607679	1	g0s2	G0/G1 switch 2 [Source:ZFIN;Acc:ZDB-GENE-081022-103]	protein_coding	ENSDART00000109464
ENSDARG00000071414		12.2248		14.4789	371	12.5056	268	15.8835	317		10.0656	217	11.3204	217	9.09462	172		14.2893	10.1602	1.40383	0.489366	0.0129227	0.251124	12	33452915	33459579	-1	cybc1	cytochrome b-245 chaperone 1 [Source:NCBI gene;Acc:436942]	protein_coding	ENSDART00000105562
ENSDARG00000071691		291.478		268.746	6895	255.725	5490	233.8	4673		328.786	7104	298.051	5726	363.759	6899		252.757	330.198	-1.30439	-0.383371	0.0129331	0.251124	12	10424676	10441661	-1	uqcrc2b	ubiquinol-cytochrome c reductase core protein 2b [Source:ZFIN;Acc:ZDB-GENE-030131-1269]	protein_coding	ENSDART00000014379,ENSDART00000149582
ENSDARG00000019525		5.73316		8.47687	217	7.522	161	6.22832	124		2.56846	55	3.46117	66	6.14217	116		7.40906	4.05726	1.98188	0.98687	0.0129399	0.251124	5	63248266	63286077	-1	tbcelb	tubulin folding cofactor E-like b [Source:ZFIN;Acc:ZDB-GENE-100921-13]	protein_coding	ENSDART00000005696,ENSDART00000131274
ENSDARG00000007018		7.77868		8.47687	217	10.922	234	8.42949	168		5.90052	127	6.1156	117	6.82756	129		9.27614	6.28122	1.46875	0.554593	0.0129694	0.251273	4	76735113	76742479	1	ms4a17a.6	membrane-spanning 4-domains, subfamily A, member 17A.6 [Source:ZFIN;Acc:ZDB-GENE-070209-265]	protein_coding	ENSDART00000075602,ENSDART00000174283
ENSDARG00000014106		89.6115		87.5943	2247	72.2625	1551	66.2103	1323		115.766	2501	103.809	1994	92.027	1745		75.3557	103.867	-1.38197	-0.466727	0.0129786	0.251273	17	10007071	10025234	-1	cfl2	cofilin 2 (muscle) [Source:ZFIN;Acc:ZDB-GENE-040426-1815]	protein_coding	ENSDART00000008355
ENSDARG00000041040		5.95999		6.87893	176	8.12749	174	6.32837	126		4.4196	95	4.97055	95	5.03499	95		7.1116	4.80838	1.47831	0.563949	0.01307	0.252693	9	30374181	30385278	-1	piga	phosphatidylinositol glycan anchor biosynthesis, class A [Source:ZFIN;Acc:ZDB-GENE-040426-1086]	protein_coding	ENSDART00000060134,ENSDART00000183416
ENSDARG00000112337		14.2176		8.04816	206	11.807	253	12.2315	244		13.953	301	17.2017	330	22.0643	418		10.6956	17.7397	-1.67127	-0.740944	0.0130937	0.252693	15	3926095	3940671	-1	mindy4b	MINDY family member 4B [Source:ZFIN;Acc:ZDB-GENE-140127-1]	protein_coding	ENSDART00000189741
ENSDARG00000102055		549.495		516.427	13250	441.889	9487	457.719	9149		629.226	13596	555.114	10665	696.595	13212		472.011	626.979	-1.32579	-0.406851	0.0131045	0.252693	20	47927720	47953524	-1	hadhb	hydroxyacyl-CoA dehydrogenase trifunctional multienzyme complex subunit beta [Source:ZFIN;Acc:ZDB-GENE-030131-8550]	protein_coding	ENSDART00000167986
ENSDARG00000068141		1.29568		0.682047	17	0.628774	13	1.07557	21		1.4115	30	2.36817	45	1.60803	30		0.795465	1.7959	-2.27648	-1.18681	0.0131194	0.252693	9	18023288	18043298	1	tnfsf11	TNF superfamily member 11 [Source:ZFIN;Acc:ZDB-GENE-090805-2]	protein_coding	ENSDART00000098355
ENSDARG00000021869		13.7193		12.6471	324	12.2727	263	9.83024	196		15.7578	340	15.0157	288	16.7921	318		11.5834	15.8552	-1.36773	-0.451787	0.0131302	0.252693	20	39055432	39188476	-1	rcan2	regulator of calcineurin 2 [Source:ZFIN;Acc:ZDB-GENE-040516-17]	protein_coding	ENSDART00000143379,ENSDART00000152858
ENSDARG00000088308		13.9635		10.5815	271	13.4371	288	11.181	223		17.609	380	14.3912	276	16.5812	314		11.7332	16.1938	-1.38884	-0.473879	0.0131605	0.252793	16	48645217	48673938	-1	notchl	notch receptor, like [Source:ZFIN;Acc:ZDB-GENE-070220-2]	protein_coding	ENSDART00000156969
ENSDARG00000002285		20.5227		23.1311	593	26.7113	573	20.7861	415		17.609	380	16.5251	317	18.3738	348		23.5428	17.5026	1.34017	0.422413	0.0131932	0.252793	1	45671687	45700574	1	mcoln1a	mucolipin 1a [Source:ZFIN;Acc:ZDB-GENE-040426-2704]	protein_coding	ENSDART00000146101
ENSDARG00000094451		134.91		156.384	4012	140.263	3011	187.325	3744		92.9042	2007	136.235	2617	96.3503	1827		161.324	108.496	1.49912	0.584112	0.0131958	0.252793	8	23672254	23702295	-1	cfp	complement factor properdin [Source:ZFIN;Acc:ZDB-GENE-030131-9247]	protein_coding	ENSDART00000136865,ENSDART00000162296
ENSDARG00000100384		10.9908		11.9456	306	13.7632	295	13.8324	276		6.54842	141	9.75893	187	10.0963	191		13.1804	8.80123	1.52921	0.612785	0.0131979	0.252793	4	61995745	61997189	1			protein_coding	ENSDART00000171539
ENSDARG00000012072		15.6153		12.6471	324	13.9961	300	13.9324	278		18.5808	401	16.1087	309	18.4265	349		13.5252	17.7054	-1.31197	-0.391739	0.0132276	0.253062	13	36680564	36691709	1	dmac2l	distal membrane arm assembly complex 2 like [Source:ZFIN;Acc:ZDB-GENE-040426-959]	protein_coding	ENSDART00000006923,ENSDART00000136030
ENSDARG00000006062		84.1443		77.1103	1978	71.1446	1527	74.5147	1489		102.252	2209	88.8713	1707	90.9726	1725		74.2566	94.0321	-1.26456	-0.338636	0.0132571	0.253236	15	30836981	30857350	-1	akap1b	A kinase (PRKA) anchor protein 1b [Source:ZFIN;Acc:ZDB-GENE-030131-6844]	protein_coding	ENSDART00000112511,ENSDART00000134878,ENSDART00000136673,ENSDART00000138988
ENSDARG00000077811		15.4348		17.4799	448	20.4701	439	17.0341	340		9.6028	207	14.235	273	13.7869	261		18.328	12.5416	1.48796	0.573336	0.013268	0.253236	17	35878544	35881841	-1	sox11a	SRY-box transcription factor 11a [Source:ZFIN;Acc:ZDB-GENE-980526-395]	protein_coding	ENSDART00000110040
ENSDARG00000040024		9.56721		11.0102	282	10.9686	235	10.7807	215		7.56654	163	8.50979	163	8.5674	162		10.9199	8.21458	1.3354	0.417272	0.0133375	0.253446	16	39248644	39267227	-1	gpd1l	glycerol-3-phosphate dehydrogenase 1 like [Source:NCBI gene;Acc:449663]	protein_coding	ENSDART00000058550,ENSDART00000133642
ENSDARG00000025465		3.78133		4.65741	119	5.7987	124	4.07717	81		1.96684	42	2.57636	49	3.61149	68		4.84443	2.71823	1.8406	0.880175	0.0133421	0.253446	14	21861099	21901815	1	spon2a	spondin 2a, extracellular matrix protein [Source:ZFIN;Acc:ZDB-GENE-990415-160]	protein_coding	ENSDART00000032141
ENSDARG00000104404		29.1393		37.9803	974	33.6045	721	33.8931	677		30.567	660	21.3135	409	17.4775	331		35.1593	23.1193	1.5542	0.636169	0.0133586	0.253446	14	52440161	52467160	1	b4galt1l	DP-Gal:betaGlcNAc beta 1,4- galactosyltransferase, polypeptide 1, like [Source:ZFIN;Acc:ZDB-GENE-061013-84]	protein_coding	ENSDART00000168437
ENSDARG00000040674		97.7696		83.9697	2154	89.775	1927	84.42	1687		103.317	2232	104.85	2014	120.286	2281		86.0549	109.484	-1.26986	-0.344668	0.0133654	0.253446	9	41690153	41741420	1	ctdsp1	CTD (carboxy-terminal domain, RNA polymerase II, polypeptide A) small phosphatase 1 [Source:ZFIN;Acc:ZDB-GENE-050522-523]	protein_coding	ENSDART00000100226
ENSDARG00000058551		55.0829		40.5915	1041	57.6376	1237	36.3944	727		61.3885	1326	69.8739	1342	64.6114	1225		44.8745	65.2913	-1.48182	-0.567374	0.013384	0.253446	16	7653905	7658707	1	popdc3	popeye domain containing 3 [Source:ZFIN;Acc:ZDB-GENE-040624-10]	protein_coding	ENSDART00000081431
ENSDARG00000074480		1.42958		0.643073	16	0.721926	15	1.37573	27		1.64289	35	1.84769	35	2.34615	44		0.913577	1.94558	-2.26656	-1.18051	0.0133941	0.253446	24	25485264	25673442	-1	cnksr2a	connector enhancer of kinase suppressor of Ras 2a [Source:ZFIN;Acc:ZDB-GENE-060228-5]	protein_coding	ENSDART00000110241,ENSDART00000142351,ENSDART00000186081,ENSDART00000189828
ENSDARG00000009342		171.424		185.809	4767	194.99	4186	206.585	4129		132.287	2858	136.443	2621	172.429	3270		195.795	147.053	1.33979	0.422007	0.0134137	0.253446	24	7941373	7957581	-1	txndc5	thioredoxin domain containing 5 [Source:ZFIN;Acc:ZDB-GENE-040426-1951]	protein_coding	ENSDART00000145815
ENSDARG00000099420		710.071		628.048	16114	448.735	9634	459.12	9177		1264.31	27319	779.803	14982	680.41	12905		511.968	908.173	-1.73089	-0.791516	0.0134146	0.253446	19	48111285	48114444	1	nme2b.2	NME/NM23 nucleoside diphosphate kinase 2b, tandem duplicate 2 [Source:ZFIN;Acc:ZDB-GENE-000210-33]	protein_coding	ENSDART00000169420
ENSDARG00000037805		1.24781		1.11076	28	1.56029	33	3.27675	65		0.439646	9	0.598548	11	0.500863	9		1.9826	0.513019	3.40242	1.76656	0.0134201	0.253446	3	57699246	57711711	-1	lgals3bpa	lectin, galactoside-binding, soluble, 3 binding protein a [Source:NCBI gene;Acc:677742]	protein_coding	ENSDART00000055088
ENSDARG00000069266		21.8724		18.9999	487	17.0235	365	17.3342	346		24.0417	519	32.0874	616	21.748	412		17.7859	25.959	-1.43775	-0.523815	0.0134457	0.253454	21	26606741	26634099	1	esrra	estrogen-related receptor alpha [Source:ZFIN;Acc:ZDB-GENE-990415-68]	protein_coding	ENSDART00000002767,ENSDART00000142667,ENSDART00000176008
ENSDARG00000030514		65.3557		52.5566	1348	54.5171	1170	58.8064	1175		63.5173	1372	86.7374	1666	75.9994	1441		55.2933	75.418	-1.35461	-0.437876	0.0134519	0.253454	1	17537451	17587552	-1	acsl1a	acyl-CoA synthetase long chain family member 1a [Source:ZFIN;Acc:ZDB-GENE-050809-115]	protein_coding	ENSDART00000039917,ENSDART00000125125,ENSDART00000131293,ENSDART00000146946
ENSDARG00000060796		134.137		134.948	3462	107.474	2307	103.48	2068		147.05	3177	161.374	3100	150.496	2854		115.301	152.973	-1.3353	-0.417164	0.0134958	0.253985	8	29770098	29851706	-1	slc20a2	solute carrier family 20 member 2 [Source:ZFIN;Acc:ZDB-GENE-060929-828]	protein_coding	ENSDART00000149297,ENSDART00000167487
ENSDARG00000102091		8.35654		9.37328	240	10.2234	219	9.48005	189		6.45586	139	7.93726	152	6.66939	126		9.69224	7.02084	1.38702	0.47199	0.013517	0.254089	1	59328030	59335940	1		general transcription factor 3C polypeptide 1 [Source:NCBI gene;Acc:100535454]	protein_coding	ENSDART00000172464
ENSDARG00000031890		16.0038		12.725	326	13.0645	280	15.5333	310		18.4883	399	16.9415	325	19.2701	365		13.7743	18.2333	-1.33245	-0.414086	0.0135918	0.254857	25	15273370	15285590	1	tcp11l1	t-complex 11, testis-specific-like 1 [Source:ZFIN;Acc:ZDB-GENE-050327-11]	protein_coding	ENSDART00000045659
ENSDARG00000056150		36.2776		34.7844	892	27.7359	595	32.4923	649		41.3499	893	40.2588	773	41.0444	778		31.6709	40.8844	-1.29576	-0.373797	0.0135988	0.254857	23	25708787	25768765	1	rbms2b	RNA binding motif, single stranded interacting protein 2b [Source:ZFIN;Acc:ZDB-GENE-040801-51]	protein_coding	ENSDART00000060059
ENSDARG00000061400		12.7388		13.9332	357	14.555	312	14.983	299		11.13	240	11.8408	227	9.9909	189		14.4904	10.9872	1.31856	0.398962	0.0136345	0.254857	13	25569831	25581303	-1	csgalnact2	chondroitin sulfate N-acetylgalactosaminyltransferase 2 [Source:ZFIN;Acc:ZDB-GENE-030131-5186]	protein_coding	ENSDART00000087533
ENSDARG00000034470		1061		954.652	24494	892.184	19155	840.473	16800		1171.38	25311	1064.24	20447	1443.09	27371		895.77	1226.24	-1.35971	-0.443296	0.0136364	0.254857	12	4052180	4070058	-1	aldoab	aldolase a, fructose-bisphosphate, b [Source:ZFIN;Acc:ZDB-GENE-040426-2299]	protein_coding	ENSDART00000042200
ENSDARG00000077009		13.907		15.9599	409	15.7194	337	17.1341	342		12.287	265	13.1941	253	9.14734	173		16.2711	11.5428	1.42073	0.506632	0.0136385	0.254857	13	30985047	31025505	-1	wdfy4	WDFY family member 4 [Source:ZFIN;Acc:ZDB-GENE-090313-322]	protein_coding	ENSDART00000137709,ENSDART00000139394,ENSDART00000145287,ENSDART00000181661
ENSDARG00000086906		15.7294		13.3876	343	13.7166	294	14.0325	280		18.442	398	16.2128	311	18.5847	352		13.7122	17.7465	-1.29406	-0.371901	0.0136525	0.254857	8	52530889	52547957	1	stambpb	STAM binding protein b [Source:ZFIN;Acc:ZDB-GENE-051127-31]	protein_coding	ENSDART00000127729,ENSDART00000159269,ENSDART00000162687,ENSDART00000170360,ENSDART00000170745
ENSDARG00000089369		11.6443		10.3476	265	9.99052	214	8.87973	177		13.0737	282	12.1531	233	15.4213	292		9.7393	13.5494	-1.38024	-0.464924	0.0137007	0.255462	12	45263874	45304971	-1	fdxr	ferredoxin reductase [Source:ZFIN;Acc:ZDB-GENE-130613-2]	protein_coding	ENSDART00000126405,ENSDART00000186537
ENSDARG00000092036		1.68006		3.09844	79	1.65344	35	2.72645	54		0.300811	6	1.43131	27	0.86992	16		2.49278	0.867347	3.45799	1.78993	0.0137673	0.255516	15	41529260	41543440	-1			unprocessed_pseudogene	ENSDART00000134232
ENSDARG00000003829		33.5138		36.7331	942	38.9141	835	35.7941	715		29.5489	638	29.3288	563	30.7635	583		37.1471	29.8804	1.24292	0.313739	0.0137734	0.255516	13	24068577	24218795	-1	galnt2	UDP-N-acetyl-alpha-D-galactosamine:polypeptide N-acetylgalactosaminyltransferase 2 [Source:ZFIN;Acc:ZDB-GENE-041111-110]	protein_coding	ENSDART00000136217
ENSDARG00000016721		548.808		521.844	13389	473.001	10155	416.297	8321		697.904	15080	575.517	11057	608.285	11537		470.381	627.235	-1.33486	-0.41669	0.0137772	0.255516	19	7276060	7291733	-1	sdha	succinate dehydrogenase complex, subunit A, flavoprotein (Fp) [Source:NCBI gene;Acc:393884]	protein_coding	ENSDART00000015559,ENSDART00000133127,ENSDART00000137654,ENSDART00000138587
ENSDARG00000091974		8.84993		7.97021	204	7.80146	167	5.92816	118		11.5465	249	9.91507	190	9.93818	188		7.23328	10.4666	-1.44854	-0.534603	0.0137943	0.255516	4	6416278	6508631	1			antisense	ENSDART00000133268,ENSDART00000144326,ENSDART00000154021
ENSDARG00000055632		219.73		186.394	4782	170.538	3661	156.158	3121		355.952	7691	228.723	4394	220.617	4184		171.03	268.431	-1.53499	-0.618228	0.013806	0.255516	15	24644016	24671419	1	smtnl	smoothelin, like [Source:ZFIN;Acc:ZDB-GENE-040212-1]	protein_coding	ENSDART00000043292,ENSDART00000181660
ENSDARG00000078259		4.42773		3.60511	92	3.23702	69	3.77701	75		5.99307	129	4.86645	93	5.08772	96		3.53971	5.31575	-1.5049	-0.589666	0.013808	0.255516	14	24248391	24251057	-1	bnip1a	BCL2 interacting protein 1a [Source:ZFIN;Acc:ZDB-GENE-081107-44]	protein_coding	ENSDART00000114169
ENSDARG00000061439		16.4195		12.2963	315	12.459	267	16.834	336		19.7841	427	18.2427	350	18.901	358		13.8631	18.9759	-1.39216	-0.477324	0.0138142	0.255516	18	40471826	40477865	1	ugt5c3	UDP glucuronosyltransferase 5 family, polypeptide C3 [Source:ZFIN;Acc:ZDB-GENE-050419-23]	protein_coding	ENSDART00000098806
ENSDARG00000099891		14.3155		14.9076	382	17.6755	379	18.9351	378		9.00118	194	11.1122	213	14.2614	270		17.1727	11.4583	1.52111	0.605123	0.0138659	0.256013	19	41509956	41513809	1	si:ch211-57n23.1	si:ch211-57n23.1 [Source:ZFIN;Acc:ZDB-GENE-141219-29]	protein_coding	ENSDART00000171318,ENSDART00000172311
ENSDARG00000061635		0.800757		1.22768	31	1.00138	21	1.1256	22		0.347089	7	0.33831	6	0.764475	14		1.11822	0.483291	2.51915	1.33294	0.0138745	0.256013	18	38900092	39042201	1	myo5aa	myosin VAa [Source:ZFIN;Acc:ZDB-GENE-041027-2]	protein_coding	ENSDART00000088037,ENSDART00000133618,ENSDART00000148428,ENSDART00000148541,ENSDART00000149059,ENSDART00000159834
ENSDARG00000063682		248.286		223.302	5729	236.256	5072	166.914	3336		270.059	5835	296.489	5696	296.696	5627		208.824	287.748	-1.39236	-0.477534	0.0139037	0.256013	19	712127	768988	1	fhod3a	formin homology 2 domain containing 3a [Source:ZFIN;Acc:ZDB-GENE-060503-633]	protein_coding	ENSDART00000093281,ENSDART00000146050,ENSDART00000180002
ENSDARG00000062485		22.8237		24.7291	634	26.4318	567	27.7898	555		22.6996	490	18.7632	360	16.5285	313		26.3169	19.3304	1.36591	0.449866	0.0139044	0.256013	7	19179819	19332421	-1	dock11	dedicator of cytokinesis 11 [Source:ZFIN;Acc:ZDB-GENE-060503-196]	protein_coding	ENSDART00000090406,ENSDART00000137575,ENSDART00000169668
ENSDARG00000008931		4.20197		4.30664	110	5.51924	118	5.72805	114		2.84613	61	3.25298	62	3.55877	67		5.18464	3.21929	1.5948	0.67338	0.0139573	0.256165	8	37030974	37043900	-1	renbp	renin binding protein [Source:ZFIN;Acc:ZDB-GENE-041212-34]	protein_coding	ENSDART00000139567
ENSDARG00000033320		11.5842		10.7374	275	9.52477	204	8.72965	174		11.9167	257	14.6514	281	13.9451	264		9.66393	13.5044	-1.38487	-0.469747	0.0139702	0.256165	13	30144937	30150592	-1	sar1ab	secretion associated, Ras related GTPase 1Ab [Source:ZFIN;Acc:ZDB-GENE-050417-437]	protein_coding	ENSDART00000041515,ENSDART00000143093
ENSDARG00000109392		24.6335		21.0265	539	20.8427	447	21.5365	430		32.4181	700	24.9568	479	27.0203	512		21.1352	28.1317	-1.32538	-0.406411	0.0139812	0.256165	11	6422374	6423160	1			protein_coding	ENSDART00000183148
ENSDARG00000017006		34.1884		29.0162	744	28.3414	608	26.3891	527		38.9897	842	49.6795	954	32.7143	620		27.9156	40.4611	-1.42826	-0.514256	0.0139837	0.256165	7	64978738	65093209	-1	dennd5a	DENN/MADD domain containing 5A [Source:ZFIN;Acc:ZDB-GENE-071211-1]	protein_coding	ENSDART00000060545,ENSDART00000192447
ENSDARG00000097209		368.711		355.736	9127	301.462	6472	303.537	6067		425.277	9189	379.089	7283	447.165	8481		320.245	417.177	-1.30371	-0.38262	0.0139919	0.256165	25	10499642	10503043	-1	cox8b	cytochrome c oxidase subunit 8B [Source:ZFIN;Acc:ZDB-GENE-110620-4]	protein_coding	ENSDART00000155404
ENSDARG00000075564		71.6851		70.017	1796	46.506	998	47.0001	939		109.518	2366	88.7672	1705	68.3019	1295		54.5077	88.8625	-1.6305	-0.705319	0.0140187	0.256167	1	50694971	50710468	-1	fam13a	family with sequence similarity 13 member A [Source:ZFIN;Acc:ZDB-GENE-050208-102]	protein_coding	ENSDART00000080389
ENSDARG00000004049		5.36362		6.56714	168	6.54391	140	6.92869	138		2.75357	59	3.77345	72	5.61494	106		6.67991	4.04732	1.73942	0.79861	0.0140376	0.256167	20	3312859	3319736	-1	marcksa	myristoylated alanine-rich protein kinase C substrate a [Source:ZFIN;Acc:ZDB-GENE-050522-145]	protein_coding	ENSDART00000123096,ENSDART00000186743
ENSDARG00000008811		21.6308		21.0655	540	26.851	576	28.6403	572		15.3413	331	17.8784	343	20.0082	379		25.5189	17.7426	1.43363	0.519674	0.0140571	0.256167	7	44608224	44621281	1	cmtm3	CKLF-like MARVEL transmembrane domain containing 3 [Source:ZFIN;Acc:ZDB-GENE-040801-206]	protein_coding	ENSDART00000005033,ENSDART00000149981
ENSDARG00000007711		17.7816		20.1691	517	19.3057	414	20.1357	402		16.1281	348	16.0567	308	14.8941	282		19.8702	15.693	1.26614	0.340435	0.0140744	0.256167	25	3099073	3118114	1	rab3il1	RAB3A interacting protein (rabin3)-like 1 [Source:ZFIN;Acc:ZDB-GENE-110921-5]	protein_coding	ENSDART00000022506,ENSDART00000167130
ENSDARG00000059354		23.6672		25.2747	648	26.0126	558	27.7898	555		21.5427	465	20.6369	396	20.7463	393		26.3591	20.9753	1.25431	0.326897	0.0140963	0.256167	19	798589	808265	-1	glmp	glycosylated lysosomal membrane protein [Source:NCBI gene;Acc:447841]	protein_coding	ENSDART00000082454,ENSDART00000140119
ENSDARG00000058158		89.0166		83.541	2143	70.3994	1511	70.9128	1417		116.136	2509	106.672	2049	86.4385	1639		74.9511	103.082	-1.36934	-0.453477	0.0141022	0.256167	24	24831727	24846603	1	trim55b	tripartite motif containing 55b [Source:ZFIN;Acc:ZDB-GENE-060312-37]	protein_coding	ENSDART00000080969
ENSDARG00000076241		70.7954		66.6263	1709	62.761	1347	46.5498	930		91.7935	1983	74.6103	1433	82.4315	1563		58.6457	82.9451	-1.42596	-0.511938	0.0141111	0.256167	17	6358160	6382392	-1	txlnbb	taxilin beta b [Source:ZFIN;Acc:ZDB-GENE-070424-77]	protein_coding	ENSDART00000115389,ENSDART00000137389,ENSDART00000188051,ENSDART00000192560
ENSDARG00000055151		39.397		34.9013	895	36.3059	779	29.991	599		40.7945	881	43.4858	835	50.9035	965		33.7327	45.0613	-1.33319	-0.414888	0.0141188	0.256167	17	32745763	32779556	-1	smyd2a	SET and MYND domain containing 2a [Source:NCBI gene;Acc:541423]	protein_coding	ENSDART00000077459,ENSDART00000123645,ENSDART00000135371,ENSDART00000142356,ENSDART00000146339
ENSDARG00000020541		54.8538		32.6018	836	42.9197	921	43.148	862		99.4295	2148	57.6948	1108	53.3288	1011		39.5565	70.151	-1.71897	-0.781541	0.0142034	0.257309	13	34765141	34793487	-1	ism1	isthmin 1 [Source:NCBI gene;Acc:497617]	protein_coding	ENSDART00000025719,ENSDART00000172138
ENSDARG00000003808		2.15117		3.02049	77	2.16578	46	3.42683	68		0.994989	21	1.7436	33	1.55531	29		2.87103	1.4313	2.04579	1.03266	0.0142219	0.257309	5	43006422	43011814	1	aqp3a	aquaporin 3a [Source:ZFIN;Acc:ZDB-GENE-040426-2826]	protein_coding	ENSDART00000009182
ENSDARG00000055223		17.0137		13.2317	339	13.2974	285	11.281	225		29.0398	627	19.2836	370	15.9485	302		12.6034	21.424	-1.6546	-0.726483	0.0142326	0.257309	12	22680115	22815847	1	ablim2	actin binding LIM protein family, member 2 [Source:ZFIN;Acc:ZDB-GENE-100316-5]	protein_coding	ENSDART00000077548,ENSDART00000152879,ENSDART00000181024,ENSDART00000183993
ENSDARG00000076673		84.8247		77.6559	1992	74.1255	1591	62.1081	1241		104.381	2255	82.8338	1591	107.844	2045		71.2965	98.3529	-1.37656	-0.461072	0.0142485	0.257309	20	52851793	52882881	-1	dspb	desmoplakin b [Source:ZFIN;Acc:ZDB-GENE-030131-1662]	protein_coding	ENSDART00000111078
ENSDARG00000101089		4.48848		4.9692	127	5.47267	117	6.3784	127		2.52218	54	4.34598	83	3.24243	61		5.60676	3.3702	1.69699	0.76298	0.0142646	0.257309	1	960209	999556	-1	gart	phosphoribosylglycinamide formyltransferase [Source:ZFIN;Acc:ZDB-GENE-000616-14]	protein_coding	ENSDART00000170884,ENSDART00000172235
ENSDARG00000034309		34.3061		32.1731	825	28.7606	617	27.5397	550		40.1466	867	34.2213	657	42.9952	815		29.4911	39.121	-1.32197	-0.402684	0.0142773	0.257309	12	36891483	36960525	1	cox10	cytochrome c oxidase assembly factor heme A:farnesyltransferase COX10 [Source:ZFIN;Acc:ZDB-GENE-041111-239]	protein_coding	ENSDART00000048927
ENSDARG00000005648		10.3028		5.20304	133	9.8508	211	6.82864	136		17.609	380	10.3835	199	11.9416	226		7.29416	13.3114	-1.87927	-0.910174	0.0143042	0.257501	8	41281801	41342918	1	olfml2a	olfactomedin-like 2A [Source:ZFIN;Acc:ZDB-GENE-081105-107]	protein_coding	ENSDART00000084439
ENSDARG00000104810		3.3102		4.69638	120	5.10006	109	3.27675	65		1.87428	40	3.25298	62	1.66076	31		4.35773	2.26267	2.00433	1.00312	0.0143395	0.257501	13	11175208	11378355	-1	akt3a	v-akt murine thymoma viral oncogene homolog 3a [Source:ZFIN;Acc:ZDB-GENE-050419-180]	protein_coding	ENSDART00000158632,ENSDART00000163206,ENSDART00000164566,ENSDART00000166811
ENSDARG00000002634		0.897794		1.14974	29	1.32741	28	1.1256	22		0.578482	12	0.5465	10	0.659031	12		1.20092	0.594671	2.02042	1.01466	0.0143547	0.257501	1	12141876	12161148	-1	b4galt1	UDP-Gal:betaGlcNAc beta 1,4- galactosyltransferase, polypeptide 1 [Source:ZFIN;Acc:ZDB-GENE-050417-236]	protein_coding	ENSDART00000162146,ENSDART00000166429
ENSDARG00000091712		5.29103		5.82663	149	6.21788	133	10.2305	204		1.64289	35	2.10793	40	5.72039	108		7.42499	3.15707	2.66277	1.41293	0.0143606	0.257501	15	37891045	37921998	-1	si:dkey-238d18.5	si:dkey-238d18.5 [Source:ZFIN;Acc:ZDB-GENE-131121-374]	protein_coding	ENSDART00000153491,ENSDART00000168790,ENSDART00000181443,ENSDART00000193597
ENSDARG00000100480		16.488		8.35995	214	17.0235	365	12.0314	240		22.5145	486	17.514	336	21.4844	407		12.4716	20.5043	-1.72787	-0.788993	0.0143797	0.257501	KN149884.1	9445	23908	-1	si:ch73-364h19.2	si:ch73-364h19.2 [Source:ZFIN;Acc:ZDB-GENE-131119-21]	protein_coding	ENSDART00000162031
ENSDARG00000020594		127.737		96.6753	2480	113.063	2427	77.1161	1541		215.496	4656	131.394	2524	132.676	2516		95.6181	159.855	-1.64562	-0.71863	0.0143953	0.257501	20	36845787	36887516	-1	txlnba	taxilin beta a [Source:ZFIN;Acc:ZDB-GENE-030131-322]	protein_coding	ENSDART00000076313,ENSDART00000143515,ENSDART00000146994
ENSDARG00000062450		24.177		26.5998	682	28.1551	604	26.6392	532		19.3676	418	23.3434	448	20.9572	397		27.1314	21.2227	1.28319	0.359738	0.0143994	0.257501	16	14231406	14248892	-1	rnf115	ring finger protein 115 [Source:ZFIN;Acc:ZDB-GENE-061215-82]	protein_coding	ENSDART00000090329
ENSDARG00000057975		8.5391		10.3866	266	21.9139	470	6.87867	137		4.92867	106	3.35707	64	3.76965	71		13.0597	4.01846	2.91861	1.54528	0.0144872	0.258734	22	12729329	12746539	-1	plcd4a	phospholipase C, delta 4a [Source:ZFIN;Acc:ZDB-GENE-050208-654]	protein_coding	ENSDART00000136841,ENSDART00000175374
ENSDARG00000033201		273.653		236.787	6075	238.958	5130	202.683	4051		260.849	5636	324.751	6239	377.888	7167		226.143	321.163	-1.4084	-0.494061	0.0145004	0.258734	20	9428965	9462449	-1	crip2l	cysteine-rich protein 2-like [Source:ZFIN;Acc:ZDB-GENE-041010-43]	protein_coding	ENSDART00000040557,ENSDART00000133000,ENSDART00000152674
ENSDARG00000006240		75.7745		66.4314	1704	73.0077	1567	61.4578	1228		86.9343	1878	81.1683	1559	85.6476	1624		66.9656	84.5834	-1.26567	-0.339905	0.0145371	0.258873	3	52545014	52603683	1	slc27a1a	solute carrier family 27 member 1a [Source:ZFIN;Acc:ZDB-GENE-050320-112]	protein_coding	ENSDART00000018908,ENSDART00000184183
ENSDARG00000007477		25.0832		22.9752	589	21.1687	454	20.8861	417		31.8628	688	25.3732	487	28.2329	535		21.6767	28.4896	-1.30947	-0.388978	0.0145402	0.258873	1	38346043	38361496	-1	fbxo8	F-box protein 8 [Source:ZFIN;Acc:ZDB-GENE-060421-7091]	protein_coding	ENSDART00000015323
ENSDARG00000040192		15.209		15.9989	410	17.6755	379	18.785	375		11.5928	250	12.4134	238	14.7886	280		17.4865	12.9316	1.35652	0.439906	0.0146059	0.259757	17	45395846	45402961	1	nenf	neudesin neurotrophic factor [Source:ZFIN;Acc:ZDB-GENE-050320-129]	protein_coding	ENSDART00000058793,ENSDART00000122128
ENSDARG00000040251		164.876		149.914	3846	229.456	4926	224.745	4492		115.21	2489	114.375	2197	155.558	2950		201.372	128.381	1.5569	0.638674	0.0146283	0.259869	16	29492749	29502787	1	ctsk	cathepsin K [Source:ZFIN;Acc:ZDB-GENE-001205-4]	protein_coding	ENSDART00000011497,ENSDART00000179680
ENSDARG00000026985		161.523		177.586	4556	174.17	3739	183.173	3661		150.706	3256	141.335	2715	142.166	2696		178.31	144.736	1.23225	0.301299	0.0146811	0.260346	11	33598213	33618612	-1	lims1	LIM and senescent cell antigen-like domains 1 [Source:ZFIN;Acc:ZDB-GENE-050522-236]	protein_coding	ENSDART00000033980,ENSDART00000179756
ENSDARG00000101169		26.3701		25.8983	664	33.8374	726	34.4434	688		17.0074	367	23.9679	460	23.0661	437		31.393	21.3471	1.47714	0.562804	0.0146874	0.260346	6	427317	442276	-1	grap2b	GRB2 related adaptor protein 2b [Source:ZFIN;Acc:ZDB-GENE-040426-1485]	protein_coding	ENSDART00000159377,ENSDART00000160131,ENSDART00000163564,ENSDART00000169789,ENSDART00000171852,ENSDART00000189134,ENSDART00000191515
ENSDARG00000103670		25.5738		23.2091	595	24.0564	516	19.0852	381		30.6133	661	27.4551	527	29.0237	550		22.1169	29.0307	-1.31592	-0.396073	0.0147261	0.260731	16	55105545	55122886	-1	cmc1	C-x(9)-C motif containing 1 [Source:ZFIN;Acc:ZDB-GENE-040426-2626]	protein_coding	ENSDART00000161086,ENSDART00000188707
ENSDARG00000053456		6.90853		5.24202	134	5.61239	120	6.12827	122		9.23257	199	8.1975	157	7.03845	133		5.66089	8.15617	-1.44815	-0.534215	0.0147413	0.260731	1	28723817	28831848	-1	zgc:172295	zgc:172295 [Source:ZFIN;Acc:ZDB-GENE-080204-72]	protein_coding	ENSDART00000148522,ENSDART00000148536,ENSDART00000148674,ENSDART00000150127
ENSDARG00000002194		9.61718		10.9322	280	9.80422	210	17.5343	350		4.18821	90	7.57293	145	7.67112	145		12.7569	6.47742	1.98435	0.988665	0.0148017	0.261247	13	45496766	45523026	-1	rhd	Rh blood group, D antigen [Source:ZFIN;Acc:ZDB-GENE-051213-1]	protein_coding	ENSDART00000020663,ENSDART00000137566
ENSDARG00000037154		41.948		54.7391	1404	47.2978	1015	45.1491	902		28.7621	621	42.3928	814	33.3469	632		49.062	34.834	1.42369	0.509637	0.0148075	0.261247	16	34321394	34401412	-1	hivep3b	HIVEP zinc finger 3b [Source:ZFIN;Acc:ZDB-GENE-100922-42]	protein_coding	ENSDART00000054020,ENSDART00000142223
ENSDARG00000094466		9.45325		10.2307	262	10.0837	216	14.0325	280		8.16817	176	6.42788	123	7.77656	147		11.449	7.45754	1.5104	0.59493	0.0148682	0.261247	9	7678136	7684002	-1	si:ch73-199e17.1	si:ch73-199e17.1 [Source:ZFIN;Acc:ZDB-GENE-100921-8]	protein_coding	ENSDART00000016360,ENSDART00000102713
ENSDARG00000040555		119.546		109.147	2800	100.022	2147	100.178	2002		137.147	2963	117.914	2265	152.869	2899		103.116	135.976	-1.31247	-0.39229	0.014904	0.261247	18	36066389	36081908	1	bckdha	branched chain keto acid dehydrogenase E1 subunit alpha [Source:ZFIN;Acc:ZDB-GENE-050522-376]	protein_coding	ENSDART00000059347
ENSDARG00000067797		56.9592		61.9104	1588	64.5774	1386	70.0123	1399		49.0784	1060	56.0813	1077	40.0954	760		65.5001	48.4184	1.36368	0.44751	0.0149139	0.261247	25	35553542	35572245	1	spi1a	Spi-1 proto-oncogene a [Source:ZFIN;Acc:ZDB-GENE-060825-351]	protein_coding	ENSDART00000113723
ENSDARG00000068242		3.14379		2.59178	66	1.7466	37	1.62587	32		3.17008	68	6.0115	115	3.71693	70		1.98808	4.2995	-2.07435	-1.05266	0.0149253	0.261247	18	45483282	45519748	1	cngb1a	cyclic nucleotide gated channel subunit beta 1a [Source:ZFIN;Acc:ZDB-GENE-050419-164]	protein_coding	ENSDART00000140089,ENSDART00000183725
ENSDARG00000075625		61.5618		49.3217	1265	48.369	1038	42.8478	856		99.4758	2149	75.0787	1442	54.2778	1029		46.8462	76.2774	-1.58245	-0.662159	0.0149397	0.261247	11	16329776	16395956	-1	lrig1	leucine-rich repeats and immunoglobulin-like domains 1 [Source:ZFIN;Acc:ZDB-GENE-031113-23]	protein_coding	ENSDART00000115085,ENSDART00000161129,ENSDART00000165121,ENSDART00000169070,ENSDART00000179925,ENSDART00000180981
ENSDARG00000053485		147.902		133.311	3420	137.329	2948	120.089	2400		175.049	3782	152.526	2930	169.107	3207		130.243	165.56	-1.27112	-0.346103	0.0149515	0.261247	17	45071531	45104750	-1	aldh6a1	aldehyde dehydrogenase 6 family, member A1 [Source:ZFIN;Acc:ZDB-GENE-030131-9192]	protein_coding	ENSDART00000075520
ENSDARG00000089883		1.43601		1.03281	26	1.14111	24	0.875467	17		1.68917	36	1.84769	35	2.02981	38		1.01646	1.85556	-1.81952	-0.863556	0.0149629	0.261247	3	52641737	52644737	-1	si:dkey-210j14.3	si:dkey-210j14.3 [Source:ZFIN;Acc:ZDB-GENE-131121-88]	protein_coding	ENSDART00000126180
ENSDARG00000014794		146.924		130.856	3357	126.663	2719	118.388	2366		158.805	3431	148.674	2856	198.157	3758		125.302	168.545	-1.33603	-0.417956	0.0149798	0.261247	3	58167288	58185030	1	uqcrc2a	ubiquinol-cytochrome c reductase core protein 2a [Source:ZFIN;Acc:ZDB-GENE-040718-405]	protein_coding	ENSDART00000010395,ENSDART00000154547,ENSDART00000155874,ENSDART00000156221
ENSDARG00000102340		2.84038		3.48818	89	4.07539	87	3.22672	64		2.4759	53	1.5354	29	2.2407	42		3.59676	2.084	1.7437	0.802149	0.0149959	0.261247	4	1301436	1360495	-1	ptn	pleiotrophin [Source:ZFIN;Acc:ZDB-GENE-030624-1]	protein_coding	ENSDART00000164623,ENSDART00000180720
ENSDARG00000036619		7.48286		5.8656	150	6.82337	146	6.02821	120		7.84422	169	9.03026	173	9.30551	176		6.23906	8.72666	-1.39655	-0.481872	0.0150033	0.261247	6	202367	205291	1	mgat3b	beta-1,4-mannosyl-glycoprotein 4-beta-N-acetylglucosaminyltransferase b [Source:ZFIN;Acc:ZDB-GENE-130820-2]	protein_coding	ENSDART00000168232
ENSDARG00000004861		4.93034		3.25434	83	4.96033	106	3.07664	61		5.29889	114	6.42788	123	6.56394	124		3.76377	6.09691	-1.64837	-0.721044	0.015014	0.261247	17	29797876	29902187	-1	esrrga	estrogen-related receptor gamma a [Source:ZFIN;Acc:ZDB-GENE-030821-2]	protein_coding	ENSDART00000009104,ENSDART00000166976
ENSDARG00000000563		1459.49		1427.95	36638	1279.32	27467	1079.5	21578		1602.97	34637	1693.29	32533	1673.91	31749		1262.26	1656.73	-1.32096	-0.401584	0.015026	0.261247	9	42732992	42873700	-1	ttn.1	titin, tandem duplicate 1 [Source:ZFIN;Acc:ZDB-GENE-030616-413]	protein_coding	ENSDART00000125953,ENSDART00000191396,ENSDART00000193688
ENSDARG00000103198		20.9064		19.1168	490	18.7002	401	17.1842	343		25.3838	548	22.1983	426	22.8552	433		18.3337	23.4791	-1.27915	-0.355189	0.0150281	0.261247	21	7121942	7128064	1	mrps2	mitochondrial ribosomal protein S2 [Source:ZFIN;Acc:ZDB-GENE-070112-992]	protein_coding	ENSDART00000171603
ENSDARG00000099646		5.51234		9.06148	232	7.80146	167	4.8776	97		2.84613	61	4.13779	79	4.3496	82		7.24685	3.77784	1.93875	0.95513	0.015029	0.261247	10	21660447	21820057	1	pcdh1g3	protocadherin 1 gamma 3 [Source:ZFIN;Acc:ZDB-GENE-050608-3]	protein_coding	ENSDART00000164519
ENSDARG00000060102		34.4095		29.328	752	32.3935	695	30.5913	611		38.2492	826	38.5413	740	37.3539	708		30.771	38.0481	-1.23792	-0.307915	0.0150503	0.261304	5	44846280	44942760	1	wu:fc93h12	KN motif and ankyrin repeat domains 1a [Source:ZFIN;Acc:ZDB-GENE-060526-215]	protein_coding	ENSDART00000084370,ENSDART00000136521,ENSDART00000145299,ENSDART00000145624,ENSDART00000193822
ENSDARG00000086842		70.659		75.0836	1926	82.9749	1781	79.2172	1583		68.4228	1478	57.0182	1095	61.2371	1161		79.0919	62.226	1.27361	0.34892	0.0150647	0.261304	9	52378484	52386733	-1	dap1b	death associated protein 1b [Source:ZFIN;Acc:ZDB-GENE-000511-4]	protein_coding	ENSDART00000171721
ENSDARG00000098540		23.4292		22.6245	580	28.1551	604	30.8915	617		18.2106	393	20.9492	402	19.7446	374		27.2237	19.6348	1.37484	0.459268	0.0151161	0.261598	3	4458390	4501026	-1	zc3h7ba	zinc finger CCCH-type containing 7Ba [Source:ZFIN;Acc:ZDB-GENE-030131-4512]	protein_coding	ENSDART00000163052
ENSDARG00000016936		70.2406		80.6569	2069	78.4571	1684	80.5179	1609		62.6843	1354	50.7725	975	68.3547	1296		79.8773	60.6038	1.32801	0.409262	0.0151188	0.261598	20	34157308	34292607	-1	hmcn1	hemicentin 1 [Source:ZFIN;Acc:ZDB-GENE-041014-322]	protein_coding	ENSDART00000020389,ENSDART00000144705,ENSDART00000153128
ENSDARG00000103980		28.8947		27.7301	711	35.7936	768	43.6983	873		20.432	441	28.1838	541	17.5302	332		35.7406	22.0487	1.62328	0.698915	0.015135	0.261598	10	187760	196815	1	ets2	v-ets avian erythroblastosis virus E26 oncogene homolog 2 [Source:ZFIN;Acc:ZDB-GENE-050522-552]	protein_coding	ENSDART00000158247,ENSDART00000160651,ENSDART00000161007,ENSDART00000165751
ENSDARG00000055620		36.4491		30.6921	787	35.421	760	29.7909	595		40.5169	875	38.5933	741	43.6805	828		31.968	40.9302	-1.28234	-0.358779	0.0151464	0.261598	11	26685982	26701611	-1	acad9	acyl-CoA dehydrogenase family, member 9 [Source:ZFIN;Acc:ZDB-GENE-060616-196]	protein_coding	ENSDART00000083010
ENSDARG00000099517		200.698		183.354	4704	138.54	2974	142.551	2849		311.385	6728	245.014	4707	183.342	3477		154.815	246.581	-1.56895	-0.649795	0.0151879	0.262035	17	1323699	1355790	1	adss1	adenylosuccinate synthase 1 [Source:NCBI gene;Acc:407989]	protein_coding	ENSDART00000172540
ENSDARG00000098573		13.4836		12.4522	319	11.1083	238	10.3805	207		16.0818	347	13.5064	259	17.372	329		11.3137	15.6534	-1.37393	-0.458306	0.0152243	0.26223	21	35652184	35853245	-1	sgcd	sarcoglycan, delta (dystrophin-associated glycoprotein) [Source:ZFIN;Acc:ZDB-GENE-030131-3684]	protein_coding	ENSDART00000172245,ENSDART00000180840
ENSDARG00000052450		18.1754		14.2061	364	16.8838	362	13.6823	273		25.3375	547	17.7222	340	21.2208	402		14.924	21.4268	-1.43073	-0.516747	0.0152408	0.26223	5	57629207	57641257	-1	hspb2	heat shock protein, alpha-crystallin-related, b2 [Source:ZFIN;Acc:ZDB-GENE-050417-260]	protein_coding	ENSDART00000074306,ENSDART00000149282
ENSDARG00000077341		344.234		315.008	8082	308.076	6614	244.055	4878		349.935	7561	392.413	7539	455.917	8647		289.047	399.422	-1.38316	-0.467965	0.0152478	0.26223	23	39807857	39849155	-1	ppp1r14c	protein phosphatase 1, regulatory (inhibitor) subunit 14C [Source:ZFIN;Acc:ZDB-GENE-050706-92]	protein_coding	ENSDART00000115330
ENSDARG00000062446		31.1931		27.1844	697	27.0839	581	21.4364	428		43.5713	941	38.4372	738	29.4455	558		25.2349	37.1513	-1.46024	-0.546203	0.0153093	0.263008	12	18524953	18527221	1	neurl2	neuralized E3 ubiquitin protein ligase 2 [Source:ZFIN;Acc:ZDB-GENE-070410-31]	protein_coding	ENSDART00000090332
ENSDARG00000079095		3.64387		3.56613	91	5.19321	111	5.87813	117		1.73545	37	3.51321	67	1.97709	37		4.87916	2.40858	2.06383	1.04532	0.0153661	0.263013	21	27356768	27362938	-1	rin1a	Ras and Rab interactor 1a [Source:ZFIN;Acc:ZDB-GENE-091204-129]	protein_coding	ENSDART00000131297
ENSDARG00000104999		108.578		84.8272	2176	89.1229	1913	78.5169	1569		178.797	3863	115.312	2215	104.891	1989		84.1557	133	-1.53848	-0.621501	0.01538	0.263013	13	7346601	7347745	1			lincRNA	ENSDART00000162564
ENSDARG00000044613		51.5747		53.6479	1376	71.4241	1533	78.767	1574		18.6271	402	45.5156	874	41.4662	786		67.9463	35.203	2.05631	1.04006	0.0153863	0.263013	21	22721957	22724980	-1	c1qa	complement component 1, q subcomponent, A chain [Source:ZFIN;Acc:ZDB-GENE-050522-86]	protein_coding	ENSDART00000035469
ENSDARG00000110954		5.17586		4.65741	119	3.93566	84	3.27675	65		5.25262	113	7.05245	135	6.88028	130		3.95661	6.39512	-1.59125	-0.670164	0.01539	0.263013	16	3004422	3027240	1		LIM domains containing 1a [Source:NCBI gene;Acc:562793]	protein_coding	ENSDART00000189969
ENSDARG00000015686		18.6062		22.6245	580	18.7468	402	26.0889	521		18.7197	404	12.7777	245	12.6797	240		22.4867	14.7257	1.5291	0.612683	0.0154063	0.263013	24	7861373	7935809	1	bmp6	bone morphogenetic protein 6 [Source:ZFIN;Acc:ZDB-GENE-050306-42]	protein_coding	ENSDART00000019705,ENSDART00000139467
ENSDARG00000090389		58.1416		48.7371	1250	48.6019	1043	47.1501	942		79.2058	1711	53.531	1028	71.6234	1358		48.1631	68.1201	-1.39568	-0.48097	0.0154089	0.263013	9	19518674	19528038	1	ndufv3	NADH:ubiquinone oxidoreductase subunit V3 [Source:ZFIN;Acc:ZDB-GENE-030131-6500]	protein_coding	ENSDART00000102214,ENSDART00000157395
ENSDARG00000067801		9.68494		5.98253	153	9.75765	209	5.82811	116		10.5284	227	10.5917	203	15.4213	292		7.18943	12.1805	-1.71625	-0.779262	0.0154255	0.263013	21	2780907	2814709	-1		sema domain, immunoglobulin domain (Ig), transmembrane domain (TM) and short cytoplasmic domain, (semaphorin) 4D [Source:NCBI gene;Acc:100333323]	protein_coding	ENSDART00000097664
ENSDARG00000077722		97.1069		81.6703	2095	67.5117	1449	75.9155	1517		101.651	2196	160.281	3079	95.6122	1813		75.0325	119.181	-1.54989	-0.632161	0.0154398	0.263013	2	25198648	25291181	1	ppp2r3a	protein phosphatase 2, regulatory subunit B'', alpha [Source:ZFIN;Acc:ZDB-GENE-070912-646]	protein_coding	ENSDART00000110922,ENSDART00000131977,ENSDART00000139080,ENSDART00000189649
ENSDARG00000028012		6.87707		5.20304	133	5.75212	123	5.87813	117		9.6028	207	7.26064	139	7.56567	143		5.6111	8.14304	-1.45589	-0.541897	0.0154765	0.263356	19	47299166	47309383	1	tpmt.2	thiopurine S-methyltransferase, tandem duplicate 2 [Source:ZFIN;Acc:ZDB-GENE-041010-177]	protein_coding	ENSDART00000051695,ENSDART00000138909,ENSDART00000158262
ENSDARG00000041736		5.56852		4.18972	107	4.07539	87	4.8776	97		7.47399	161	5.38693	103	7.4075	140		4.3809	6.75614	-1.54056	-0.623459	0.0154925	0.263356	20	40761717	40766618	-1	hsdl1	hydroxysteroid dehydrogenase like 1 [Source:NCBI gene;Acc:494064]	protein_coding	ENSDART00000061173,ENSDART00000152938,ENSDART00000153002,ENSDART00000153399
ENSDARG00000015006		92.0834		85.1	2183	80.0872	1719	81.9687	1638		107.436	2321	98.4481	1891	99.4609	1886		82.3853	101.782	-1.23487	-0.304354	0.0155356	0.263519	25	20229573	20258634	-1	dnm1l	dynamin 1-like [Source:NCBI gene;Acc:393896]	protein_coding	ENSDART00000006840,ENSDART00000133860,ENSDART00000145987,ENSDART00000173434
ENSDARG00000063370		5.72714		8.63277	221	5.70554	122	7.57904	151		2.75357	59	4.76236	91	4.92955	93		7.30578	4.14849	1.82947	0.871429	0.0155902	0.263519	23	4324625	4344591	1	sgk2a	serum/glucocorticoid regulated kinase 2a [Source:ZFIN;Acc:ZDB-GENE-030131-9632]	protein_coding	ENSDART00000135027,ENSDART00000136792,ENSDART00000146302,ENSDART00000179819
ENSDARG00000086877		11.9626		10.8153	277	10.0371	215	10.1804	203		14.0918	304	14.235	273	12.4161	235		10.3443	13.581	-1.30994	-0.389497	0.0155903	0.263519	1	47125610	47135341	-1	mhc1zda	major histocompatibility complex class I ZDA [Source:ZFIN;Acc:ZDB-GENE-130206-7]	lincRNA	ENSDART00000150683,ENSDART00000157657,ENSDART00000158696
ENSDARG00000095968		1.63413		2.66973	68	1.60687	34	2.27621	45		0.94871	20	1.27517	24	1.02809	19		2.18427	1.08399	2.01428	1.01026	0.0156245	0.263519	5	35458346	35478425	1	erlin2	ER lipid raft associated 2 [Source:ZFIN;Acc:ZDB-GENE-090505-4]	protein_coding	ENSDART00000141239
ENSDARG00000006181		36.9007		34.0439	873	34.536	741	26.4891	529		43.0159	929	39.2699	754	44.0496	835		31.6897	42.1118	-1.3351	-0.416948	0.0156317	0.263519	13	31757331	31783663	1	hif1aa	hypoxia inducible factor 1 subunit alpha a [Source:ZFIN;Acc:ZDB-GENE-080917-55]	protein_coding	ENSDART00000044282,ENSDART00000144328,ENSDART00000147222
ENSDARG00000079219		200.779		168.66	4327	182.182	3911	139.9	2796		293.614	6344	214.254	4116	206.066	3908		163.581	237.978	-1.44462	-0.530691	0.0156428	0.263519	11	44452233	44485762	-1	mfn1b	mitofusin 1b [Source:ZFIN;Acc:ZDB-GENE-040426-1553]	protein_coding	ENSDART00000113222,ENSDART00000166674,ENSDART00000172828,ENSDART00000186613,ENSDART00000188016
ENSDARG00000054588		517.646		489.807	12567	449.201	9644	390.783	7811		647.136	13983	520.346	9997	608.602	11543		443.264	592.028	-1.33598	-0.417896	0.015646	0.263519	3	31039923	31042102	1	cox6a2	cytochrome c oxidase subunit 6A2 [Source:ZFIN;Acc:ZDB-GENE-040912-129]	protein_coding	ENSDART00000140547,ENSDART00000147706
ENSDARG00000041644		8.32022		12.6471	324	7.89461	169	12.5317	250		3.3552	72	8.45774	162	5.03499	95		11.0245	5.61598	2.09693	1.06828	0.0157011	0.263519	23	40872688	40895168	-1	si:dkey-194e6.1	si:dkey-194e6.1 [Source:ZFIN;Acc:ZDB-GENE-100922-43]	protein_coding	ENSDART00000061037
ENSDARG00000053021		31.0641		29.0162	744	24.8948	534	25.5886	511		36.9997	799	30.3698	583	39.5155	749		26.4999	35.6283	-1.33768	-0.419731	0.0157376	0.263519	5	42943972	42950963	-1	grsf1	G-rich RNA sequence binding factor 1 [Source:ZFIN;Acc:ZDB-GENE-060825-196]	protein_coding	ENSDART00000149549,ENSDART00000149868
ENSDARG00000075017		121.858		110.979	2847	115.531	2480	92.1241	1841		134.925	2915	145.863	2802	131.727	2498		106.211	137.505	-1.29971	-0.378187	0.0157523	0.263519	7	52389958	52417777	-1	myzap	myocardial zonula adherens protein [Source:ZFIN;Acc:ZDB-GENE-041111-91]	protein_coding	ENSDART00000110265,ENSDART00000148579
ENSDARG00000010531		49.3399		54.3104	1393	50.6513	1087	65.2598	1304		46.9033	1013	41.508	797	37.4066	709		56.7405	41.9393	1.35025	0.433223	0.0157557	0.263519	22	22302614	22315323	1	scamp4	secretory carrier membrane protein 4 [Source:ZFIN;Acc:ZDB-GENE-050913-40]	protein_coding	ENSDART00000049434,ENSDART00000129975
ENSDARG00000020544		93.8826		83.502	2142	85.4434	1834	79.7175	1593		94.7091	2046	112.449	2160	107.475	2038		82.8877	104.878	-1.26263	-0.336433	0.0157579	0.263519	11	24313931	24332052	1	rem1	RAS (RAD and GEM)-like GTP-binding 1 [Source:ZFIN;Acc:ZDB-GENE-040317-1]	protein_coding	ENSDART00000017599,ENSDART00000166045,ENSDART00000171491,ENSDART00000186028
ENSDARG00000009336		26.2077		28.3147	726	30.9962	665	32.5924	651		26.911	581	20.5328	394	17.8993	339		30.6344	21.781	1.41841	0.504274	0.0157623	0.263519	5	34549365	34575502	1	aif1l	allograft inflammatory factor 1-like [Source:ZFIN;Acc:ZDB-GENE-030131-9646]	protein_coding	ENSDART00000009500,ENSDART00000136787,ENSDART00000139317
ENSDARG00000019362		75.1074		78.4354	2012	84.279	1809	86.5712	1730		69.5798	1503	67.1675	1290	64.6114	1225		83.0952	67.1195	1.23759	0.307537	0.0157636	0.263519	2	26288301	26300619	1	ptbp1a	polypyrimidine tract binding protein 1a [Source:ZFIN;Acc:ZDB-GENE-050522-492]	protein_coding	ENSDART00000017668,ENSDART00000141564
ENSDARG00000101469		1.13985		1.42256	36	1.51372	32	1.876	37		0.300811	6	1.06698	20	0.659031	12		1.60409	0.675606	2.70032	1.43313	0.0157691	0.263519	4	54864061	55069079	1	si:dkey-56m15.2	si:dkey-56m15.2 [Source:ZFIN;Acc:ZDB-GENE-110913-122]	protein_coding	ENSDART00000099760,ENSDART00000128531,ENSDART00000157604,ENSDART00000159142
ENSDARG00000030340		62.3181		75.1226	1927	60.7117	1303	77.8665	1556		49.7726	1075	58.3194	1120	52.1161	988		71.2336	53.4027	1.3291	0.410445	0.0157715	0.263519	2	3026802	3045863	-1	guk1a	guanylate kinase 1a [Source:ZFIN;Acc:ZDB-GENE-040625-130]	protein_coding	ENSDART00000105818,ENSDART00000186795,ENSDART00000187575,ENSDART00000192642
ENSDARG00000059259		730.302		615.265	15786	703.738	15109	495.189	9898		969.605	20951	853.971	16407	744.046	14112		604.731	855.874	-1.42171	-0.507627	0.0157792	0.263519	17	25303671	25326685	-1	pabpc4	poly(A) binding protein, cytoplasmic 4 (inducible form) [Source:ZFIN;Acc:ZDB-GENE-030131-9663]	protein_coding	ENSDART00000082327,ENSDART00000168822
ENSDARG00000092881		33.9275		30.7701	789	31.6017	678	23.3875	467		43.8489	947	37.6044	722	36.3521	689		28.5864	39.2685	-1.37937	-0.464012	0.0158175	0.263628	22	29692252	29835933	-1		RNA binding motif protein 20 [Source:NCBI gene;Acc:497540]	processed_transcript	ENSDART00000125017,ENSDART00000135503,ENSDART00000180697,ENSDART00000190613
ENSDARG00000002791		857.032		825.024	21168	629.683	13519	739.819	14788		987.237	21332	1077.78	20707	882.653	16741		731.509	982.555	-1.34705	-0.429799	0.0158183	0.263628	1	1712140	1793371	1	atp1a1a.1	ATPase Na+/K+ transporting subunit alpha 1a, tandem duplicate 1 [Source:ZFIN;Acc:ZDB-GENE-001212-1]	protein_coding	ENSDART00000081047,ENSDART00000132968,ENSDART00000135994,ENSDART00000136381,ENSDART00000137184,ENSDART00000147682
ENSDARG00000095078		3.21363		2.98152	76	2.35208	50	2.12613	42		3.91054	84	3.8255	73	4.08599	77		2.48658	3.94068	-1.58065	-0.660515	0.0158839	0.264124	9	23885643	23886737	1			processed_transcript	ENSDART00000141274
ENSDARG00000019353		692.892		764.146	19606	828.189	17781	838.222	16755		449.619	9715	579.264	11129	697.913	13237		810.186	575.599	1.42885	0.51485	0.0158913	0.264124	14	25937948	25956860	-1	sparc	secreted protein, acidic, cysteine-rich (osteonectin) [Source:ZFIN;Acc:ZDB-GENE-030131-9]	protein_coding	ENSDART00000039660,ENSDART00000135627,ENSDART00000141304,ENSDART00000141916,ENSDART00000142572,ENSDART00000146022,ENSDART00000181455
ENSDARG00000040991		39.7633		34.1608	876	39.0539	838	31.7919	635		44.4506	960	43.0694	827	46.0531	873		35.0022	44.5243	-1.27598	-0.351604	0.0158971	0.264124	18	20726149	20822045	-1	cttnbp2	cortactin binding protein 2 [Source:ZFIN;Acc:ZDB-GENE-030131-8134]	protein_coding	ENSDART00000100743,ENSDART00000143233
ENSDARG00000102626		26.4113		40.0849	1028	28.2483	606	27.2395	544		23.9492	517	21.5737	414	17.372	329		31.8576	20.965	1.50933	0.593904	0.0159206	0.264243	15	32436907	32596155	-1	frem2b	FRAS1 related extracellular matrix 2b [Source:ZFIN;Acc:ZDB-GENE-081119-4]	protein_coding	ENSDART00000164670,ENSDART00000171808
ENSDARG00000045017		29.3845		27.3014	700	18.6536	400	23.9878	479		33.066	714	43.6419	838	29.6564	562		23.3143	35.4548	-1.51478	-0.599108	0.0160499	0.265845	11	355305	360317	1	pdrg1	p53 and DNA-damage regulated 1 [Source:ZFIN;Acc:ZDB-GENE-050417-276]	protein_coding	ENSDART00000136375,ENSDART00000147426
ENSDARG00000087456		23.869		22.5465	578	18.1879	390	20.2358	404		28.6696	619	23.7597	456	29.8145	565		20.3234	27.4146	-1.34535	-0.427979	0.01605	0.265845	20	50048836	50049099	-1		NADH:ubiquinone oxidoreductase subunit B1 [Source:HGNC Symbol;Acc:HGNC:7695]	protein_coding	ENSDART00000123634
ENSDARG00000088672		7.83925		9.4902	243	8.17407	175	9.53008	190		6.27074	135	6.53198	125	7.03845	133		9.06478	6.61372	1.3728	0.457118	0.0160928	0.26628	9	53011309	53062083	-1	zmp:0000000936	zmp:0000000936 [Source:ZFIN;Acc:ZDB-GENE-130530-939]	protein_coding	ENSDART00000122155
ENSDARG00000012914		146.555		136.741	3508	121.726	2613	130.144	2601		161.443	3488	177.04	3401	152.236	2887		129.537	163.573	-1.26177	-0.335451	0.0161715	0.26668	2	16198735	16359042	-1	arhgef4	Rho guanine nucleotide exchange factor (GEF) 4 [Source:ZFIN;Acc:ZDB-GENE-070912-575]	protein_coding	ENSDART00000057216,ENSDART00000133708,ENSDART00000152031,ENSDART00000165953,ENSDART00000173758
ENSDARG00000059049		56.327		75.2395	1930	49.3006	1058	82.3689	1646		38.4806	831	49.4192	949	43.1533	818		68.9697	43.6844	1.55032	0.632564	0.0161816	0.26668	19	5690933	5699703	-1	zgc:174904	zgc:174904 [Source:ZFIN;Acc:ZDB-GENE-080204-76]	protein_coding	ENSDART00000082050
ENSDARG00000055518		3.15108		1.89024	48	1.00138	21	2.72645	54		4.14193	89	6.16764	118	2.97882	56		1.87269	4.42946	-2.46186	-1.29975	0.0161832	0.26668	21	28445052	28472239	1	pygma	phosphorylase, glycogen, muscle A [Source:ZFIN;Acc:ZDB-GENE-050522-482]	protein_coding	ENSDART00000077871
ENSDARG00000043185		15.575		17.5578	450	16.9303	363	18.6349	372		12.0556	260	15.328	294	12.9434	245		17.7077	13.4423	1.32516	0.406169	0.0161903	0.26668	8	20194155	20230802	-1	mllt1a	MLLT1 super elongation complex subunit a [Source:ZFIN;Acc:ZDB-GENE-081105-45]	protein_coding	ENSDART00000063400,ENSDART00000193677
ENSDARG00000004592		236.03		192.396	4936	213.853	4591	167.364	3345		352.897	7625	249.126	4786	240.546	4562		191.204	280.856	-1.45332	-0.539349	0.0162053	0.26668	4	2619132	2623487	1	gpr22a	G protein-coupled receptor 22a [Source:NCBI gene;Acc:504167]	protein_coding	ENSDART00000013924,ENSDART00000128807
ENSDARG00000042090		93.7071		121.541	3118	90.7065	1947	134.997	2698		51.6237	1115	74.1418	1424	89.2327	1692		115.748	71.6661	1.63329	0.707785	0.0162159	0.26668	5	1911814	1923875	1	si:ch73-55i23.1	si:ch73-55i23.1 [Source:NCBI gene;Acc:100148818]	protein_coding	ENSDART00000172233
ENSDARG00000069142		78.399		93.0897	2388	77.9913	1674	92.4743	1848		67.2659	1453	71.9038	1381	67.6693	1283		87.8518	68.9463	1.27055	0.345451	0.0162729	0.267345	18	18636273	18821929	-1	aars1	alanyl-tRNA synthetase 1 [Source:ZFIN;Acc:ZDB-GENE-030131-3663]	protein_coding	ENSDART00000076695,ENSDART00000100401,ENSDART00000136544,ENSDART00000178875
ENSDARG00000054060		38.7969		31.1208	798	38.5881	828	30.4913	609		39.869	861	46.7648	898	45.9476	871		33.4001	44.1938	-1.32728	-0.408472	0.0163052	0.267409	21	38509465	38582061	-1	pof1b	POF1B actin binding protein [Source:ZFIN;Acc:ZDB-GENE-030131-4287]	protein_coding	ENSDART00000124349,ENSDART00000148939,ENSDART00000193891
ENSDARG00000091511		6.07799		7.15175	183	6.68364	143	8.72965	174		3.26264	70	4.8144	92	5.82583	110		7.52168	4.63429	1.66847	0.738526	0.0163225	0.267409	23	42219613	42232124	-1	gpx7	glutathione peroxidase 7 [Source:ZFIN;Acc:ZDB-GENE-050522-419]	protein_coding	ENSDART00000149944
ENSDARG00000032369		41.788		55.2458	1417	42.1745	905	46.8	935		34.2693	740	39.9986	768	32.2398	611		48.0734	35.5025	1.35171	0.434785	0.0163338	0.267409	20	20927827	20932782	-1	btbd6b	BTB (POZ) domain containing 6b [Source:NCBI gene;Acc:553533]	protein_coding	ENSDART00000039907,ENSDART00000123909,ENSDART00000152415,ENSDART00000152726,ENSDART00000152756
ENSDARG00000026704		13.5046		14.7127	377	14.9741	321	16.3337	326		12.4721	269	10.4876	201	12.0471	228		15.3402	11.6689	1.31225	0.392046	0.0163429	0.267409	15	41752335	41756507	-1	ftr72	finTRIM family, member 72 [Source:ZFIN;Acc:ZDB-GENE-041114-86]	protein_coding	ENSDART00000099302,ENSDART00000139498
ENSDARG00000054805		5.85049		6.52816	167	7.05624	151	7.47899	149		5.76168	124	4.03369	77	4.24416	80		7.02113	4.67984	1.50005	0.585014	0.0163849	0.267825	7	24520518	24527246	1	btr09	bloodthirsty-related gene family, member 9 [Source:ZFIN;Acc:ZDB-GENE-080722-46]	protein_coding	ENSDART00000077047,ENSDART00000173542,ENSDART00000173604
ENSDARG00000090062		4.55264		6.37227	163	4.8206	103	5.82811	116		2.38335	51	3.8255	73	4.08599	77		5.67366	3.43161	1.7152	0.778374	0.0164212	0.268146	3	36248851	36260102	-1	rac3a	Rac family small GTPase 3a [Source:ZFIN;Acc:ZDB-GENE-040718-256]	protein_coding	ENSDART00000126588
ENSDARG00000087623		3.39948		3.83895	98	3.74936	80	5.47792	109		2.15195	46	3.14888	60	2.02981	38		4.35541	2.44355	1.77794	0.830203	0.0164585	0.26816	22	11102991	11104253	1			lincRNA	ENSDART00000148963
ENSDARG00000090912		78.5321		86.0354	2207	80.7393	1733	95.676	1912		69.9038	1510	67.5838	1298	71.2544	1351		87.4835	69.5807	1.25455	0.32717	0.016475	0.26816	17	43030317	43031828	-1	npc2	Niemann-Pick disease, type C2 [Source:NCBI gene;Acc:282673]	protein_coding	ENSDART00000050399,ENSDART00000132754,ENSDART00000139875
ENSDARG00000023609		2.24253		1.42256	36	1.9329	41	1.67589	33		3.07752	66	2.42021	46	2.9261	55		1.67712	2.80794	-1.6965	-0.762562	0.0164853	0.26816	11	38614476	38876352	1			lincRNA	ENSDART00000041800,ENSDART00000156378
ENSDARG00000028943		10.1193		8.86661	227	7.75488	166	7.67909	153		10.6672	230	10.6958	205	15.0523	285		8.1002	12.1384	-1.46918	-0.55501	0.0164883	0.26816	18	14772474	14836862	-1	mtss1la	MTSS I-BAR domain containing 2a [Source:ZFIN;Acc:ZDB-GENE-030219-89]	protein_coding	ENSDART00000045232,ENSDART00000124843,ENSDART00000144660
ENSDARG00000063916		702.924		633.076	16243	550.923	11828	511.047	10215		1028.33	22220	649.736	12483	844.429	16016		565.015	840.833	-1.46835	-0.554194	0.0165051	0.268163	MT	11009	11305	1	mt-nd4l	NADH dehydrogenase subunit 4L [Source:NCBI gene;Acc:140538]	protein_coding	ENSDART00000093617
ENSDARG00000013044		156.17		151.941	3898	126.989	2726	129.644	2591		192.496	4159	162.311	3118	173.641	3293		136.191	176.149	-1.29448	-0.372372	0.0165257	0.268227	2	54641644	54690184	1	ndufv2	NADH:ubiquinone oxidoreductase core subunit V2 [Source:ZFIN;Acc:ZDB-GENE-040426-1713]	protein_coding	ENSDART00000027313
ENSDARG00000020007		1336.95		1342.79	34453	1757.7	37738	1620.64	32395		885.795	19140	1123.32	21582	1291.46	24495		1573.71	1100.19	1.4385	0.524564	0.0165497	0.268256	19	40983221	41002980	1	col1a2	collagen, type I, alpha 2 [Source:ZFIN;Acc:ZDB-GENE-030131-8415]	protein_coding	ENSDART00000144544
ENSDARG00000036774		87.403		79.4487	2038	79.2954	1702	76.4157	1527		97.856	2114	100.166	1924	91.2362	1730		78.3866	96.4193	-1.22929	-0.297824	0.0165607	0.268256	1	41201586	41287914	-1	rgs12b	regulator of G protein signaling 12b [Source:ZFIN;Acc:ZDB-GENE-031006-13]	protein_coding	ENSDART00000022546,ENSDART00000125988,ENSDART00000126853,ENSDART00000134739,ENSDART00000144424
ENSDARG00000079712		1.83943		2.04614	52	3.05072	65	2.52635	50		0.532203	11	1.43131	27	1.44987	27		2.54107	1.13779	2.44927	1.29235	0.0166129	0.268712	7	26393751	26408472	-1	gal3st4	galactose-3-O-sulfotransferase 4 [Source:ZFIN;Acc:ZDB-GENE-080408-1]	protein_coding	ENSDART00000111494
ENSDARG00000042141		7.77337		8.98353	230	7.98776	171	10.5306	210		6.77981	146	6.47993	124	5.87855	111		9.1673	6.37943	1.42305	0.508983	0.0166413	0.268712	17	36687094	36842267	-1	myo6b	myosin VIb [Source:ZFIN;Acc:ZDB-GENE-030318-3]	protein_coding	ENSDART00000042203,ENSDART00000061762,ENSDART00000131566,ENSDART00000176989
ENSDARG00000094815		19.8998		17.324	444	14.9276	320	9.93029	198		33.9916	734	24.9568	479	18.2683	346		14.0606	25.7389	-1.80754	-0.854025	0.016649	0.268712	13	7322245	7340412	1			lincRNA	ENSDART00000140828,ENSDART00000167330
ENSDARG00000052118		14.7877		9.52917	244	15.5796	334	9.43003	188		15.7116	339	17.1497	329	21.3262	404		11.5129	18.0625	-1.60203	-0.679902	0.0166553	0.268712	7	50475703	50517023	-1	adamtsl5	ADAMTS like 5 [Source:ZFIN;Acc:ZDB-GENE-161017-76]	protein_coding	ENSDART00000073910
ENSDARG00000086753		6.30192		4.85228	124	5.23979	112	4.52741	90		9.78792	211	7.15655	137	6.24761	118		4.87316	7.73069	-1.57178	-0.652395	0.0166894	0.268772	5	1219187	1223706	1	gb:bc139872	expressed sequence BC139872 [Source:NCBI gene;Acc:100856806]	protein_coding	ENSDART00000129490
ENSDARG00000099396		1.43623		2.94255	75	1.60687	34	1.72592	34		1.13382	24	0.33831	6	0.86992	16		2.09178	0.780685	2.92868	1.55025	0.0166924	0.268772	7	74141297	74144215	1	rbpms	RNA binding protein, mRNA processing factor [Source:ZFIN;Acc:ZDB-GENE-161017-145]	protein_coding	ENSDART00000164992
ENSDARG00000013063		2.55046		3.761	96	2.77126	59	3.22672	64		1.50405	32	1.5354	29	2.50432	47		3.253	1.84792	1.82315	0.866434	0.0167089	0.268772	8	31716872	31818916	1	oxct1a	3-oxoacid CoA transferase 1a [Source:ZFIN;Acc:ZDB-GENE-040723-3]	protein_coding	ENSDART00000013434,ENSDART00000137302,ENSDART00000141226,ENSDART00000142519,ENSDART00000161121
ENSDARG00000100336		9.61916		11.283	289	10.1768	218	12.1815	243		8.02933	173	6.84426	131	9.20007	174		11.2138	8.02455	1.40277	0.488278	0.0167289	0.268826	6	23712911	23781581	1	pik3r6a	phosphoinositide-3-kinase, regulatory subunit 6a [Source:ZFIN;Acc:ZDB-GENE-170330-1]	protein_coding	ENSDART00000164366,ENSDART00000167795
ENSDARG00000093008		5.87285		3.52716	90	4.16854	89	5.77808	115		6.03935	130	7.15655	137	8.5674	162		4.49126	7.25443	-1.649	-0.72159	0.0167684	0.268993	20	35495687	35512932	-1	adgrf3b	adhesion G protein-coupled receptor F3b [Source:ZFIN;Acc:ZDB-GENE-041001-207]	protein_coding	ENSDART00000137690,ENSDART00000169538
ENSDARG00000062370		54.716		46.2038	1185	48.928	1050	44.6988	893		51.7626	1118	69.6137	1337	67.0893	1272		46.6102	62.8219	-1.33735	-0.419381	0.0167725	0.268993	18	20581685	20608300	-1	bcl2l13	BCL2 like 13 [Source:ZFIN;Acc:ZDB-GENE-050419-215]	protein_coding	ENSDART00000090156,ENSDART00000134722,ENSDART00000140632,ENSDART00000151864,ENSDART00000151980
ENSDARG00000096867		1.27134		1.85127	47	2.49181	53	1.1256	22		0.902432	19	0.650595	12	0.606308	11		1.82289	0.719778	2.45248	1.29424	0.0168403	0.269745	17	15983247	16034453	1	clmn	calmin [Source:ZFIN;Acc:ZDB-GENE-131127-546]	protein_coding	ENSDART00000154275,ENSDART00000190806
ENSDARG00000058903		5.87936		6.76201	173	6.82337	146	6.97872	139		5.0675	109	4.34598	83	5.29861	100		6.8547	4.90403	1.40011	0.485539	0.0168528	0.269745	6	7123980	7133531	1	si:ch211-237c6.4	si:ch211-237c6.4 [Source:ZFIN;Acc:ZDB-GENE-120215-39]	protein_coding	ENSDART00000151311,ENSDART00000179738
ENSDARG00000093997		11.9844		11.9845	307	13.67	293	16.5838	331		9.18629	198	10.2274	196	10.2545	194		14.0795	9.88939	1.40634	0.491944	0.0169085	0.270369	1	44925422	44928987	-1	si:dkey-9i23.15	si:dkey-9i23.15 [Source:ZFIN;Acc:ZDB-GENE-090313-361]	protein_coding	ENSDART00000134635
ENSDARG00000086825		17.7728		26.1711	671	21.355	458	17.2342	344		16.1281	348	14.7555	283	10.9926	208		21.5868	13.9587	1.5464	0.628913	0.0169254	0.270372	20	18325556	18330250	1	znf521	zinc finger protein 521 [Source:ZFIN;Acc:ZDB-GENE-141210-10]	protein_coding	ENSDART00000123559
ENSDARG00000020442		77.2249		80.54	2066	84.8845	1822	92.8745	1856		73.5598	1589	64.9815	1248	66.5094	1261		86.0997	68.3502	1.25945	0.332792	0.0169437	0.270397	13	33645413	33654931	-1	snx5	sorting nexin 5 [Source:ZFIN;Acc:ZDB-GENE-040426-2857]	protein_coding	ENSDART00000020350
ENSDARG00000041413		2.19601		1.61743	41	1.65344	35	1.72592	34		2.89241	62	2.94069	56	2.34615	44		1.6656	2.72642	-1.63653	-0.710638	0.0170307	0.27092	20	46371458	46423475	1	adgrg11	adhesion G protein-coupled receptor G11 [Source:ZFIN;Acc:ZDB-GENE-041210-320]	protein_coding	ENSDART00000060710,ENSDART00000152912
ENSDARG00000103277		2.2107		1.07179	27	1.7466	37	0.82544	16		2.19823	47	4.97055	95	2.45159	46		1.21461	3.20679	-2.55947	-1.35585	0.0170633	0.27092	6	55852274	55864687	-1	cyp24a1	cytochrome P450, family 24, subfamily A, polypeptide 1 [Source:ZFIN;Acc:ZDB-GENE-060825-1]	protein_coding	ENSDART00000160991
ENSDARG00000042277		8.36314		6.21637	159	7.61516	163	6.07824	121		12.5646	271	8.92617	171	8.77829	166		6.63659	10.0897	-1.51931	-0.603421	0.0170748	0.27092	7	20965880	21089475	1	efnb3b	ephrin-B3b [Source:ZFIN;Acc:ZDB-GENE-010618-3]	protein_coding	ENSDART00000062003,ENSDART00000185570
ENSDARG00000020488		10.1359		8.39892	215	8.8727	190	7.27888	145		13.3976	289	13.2982	255	9.56912	181		8.1835	12.0883	-1.46525	-0.551149	0.017075	0.27092	12	20412293	20482061	1	arhgap17a	Rho GTPase activating protein 17a [Source:ZFIN;Acc:ZDB-GENE-050417-56]	protein_coding	ENSDART00000115015,ENSDART00000177573,ENSDART00000186783
ENSDARG00000076895		21.0684		23.8327	611	21.8208	468	24.9383	498		17.7941	384	19.4398	373	18.5847	352		23.5306	18.6062	1.26421	0.338235	0.0170786	0.27092	13	33811842	33822550	-1	flrt3	fibronectin leucine rich transmembrane 3 [Source:ZFIN;Acc:ZDB-GENE-030131-1988]	protein_coding	ENSDART00000143703
ENSDARG00000091293		30.3417		26.6388	683	26.3387	565	24.8883	497		40.5632	876	33.6488	646	29.9727	568		25.9552	34.7282	-1.32876	-0.410079	0.0171174	0.27092	18	39669255	39787040	-1	dmxl2	Dmx-like 2 [Source:ZFIN;Acc:ZDB-GENE-031007-6]	protein_coding	ENSDART00000148383,ENSDART00000149158,ENSDART00000149890,ENSDART00000169916
ENSDARG00000114589		40.9145		38.2921	982	31.3689	673	34.0932	681		39.4062	851	49.3672	948	52.9597	1004		34.5847	47.2444	-1.35873	-0.442255	0.0171303	0.27092	15	19293744	19320615	1	jam3a	junctional adhesion molecule 3a [Source:ZFIN;Acc:ZDB-GENE-070424-177]	protein_coding	ENSDART00000123815,ENSDART00000183363,ENSDART00000184994,ENSDART00000188718
ENSDARG00000021135		58.6857		54.6222	1401	52.5609	1128	46.1496	922		67.6361	1461	59.1001	1135	72.0452	1366		51.1109	66.2605	-1.2952	-0.373174	0.017135	0.27092	7	24039464	24047316	-1	dhrs4	dehydrogenase/reductase (SDR family) member 4 [Source:ZFIN;Acc:ZDB-GENE-040426-1498]	protein_coding	ENSDART00000124653,ENSDART00000127813,ENSDART00000144616,ENSDART00000184799
ENSDARG00000068082		8.03008		10.1528	260	7.80146	167	10.7307	214		6.03935	130	7.2086	138	6.24761	118		9.56165	6.49852	1.46619	0.552072	0.0171451	0.27092	6	60018233	60020385	-1	wbp4	WW domain binding protein 4 [Source:ZFIN;Acc:ZDB-GENE-050522-342]	protein_coding	ENSDART00000098247,ENSDART00000167740,ENSDART00000169990
ENSDARG00000041959		92.6413		87.7892	2252	127.734	2742	146.253	2923		38.5269	832	76.2237	1464	79.3209	1504		120.592	64.6905	1.91747	0.939206	0.017147	0.27092	9	10692905	10694930	1	cxcr4b	chemokine (C-X-C motif), receptor 4b [Source:ZFIN;Acc:ZDB-GENE-010614-1]	protein_coding	ENSDART00000061499
ENSDARG00000062002		38.4065		45.3074	1162	41.1032	882	41.3971	827		35.7039	771	34.8459	669	32.0816	608		42.6026	34.2105	1.2452	0.316382	0.0171954	0.27092	11	25403561	25408636	1	adnpa	activity-dependent neuroprotector homeobox a [Source:ZFIN;Acc:ZDB-GENE-061215-112]	protein_coding	ENSDART00000089120
ENSDARG00000001782		3.80298		5.16407	132	3.70278	79	5.72805	114		3.3552	72	2.7325	52	2.13526	40		4.86497	2.74098	1.76233	0.817482	0.0172237	0.27092	11	8129536	8150894	1	prkacba	protein kinase, cAMP-dependent, catalytic, beta a [Source:ZFIN;Acc:ZDB-GENE-040426-1351]	protein_coding	ENSDART00000011183,ENSDART00000158112
ENSDARG00000020610		4372.79		3905.11	100197	4147.51	89048	3314.49	66254		5437.8	117501	4628.52	88928	4803.3	91105		3789.04	4956.54	-1.31078	-0.390423	0.0172384	0.27092	23	5653224	5685172	-1	tnnt2a	troponin T type 2a (cardiac) [Source:ZFIN;Acc:ZDB-GENE-000626-1]	protein_coding	ENSDART00000067351,ENSDART00000102766,ENSDART00000148680,ENSDART00000149365
ENSDARG00000007247		19.609		18.1425	465	14.8344	318	17.4343	348		21.5427	465	25.165	483	20.5354	389		16.8037	22.4144	-1.33122	-0.412745	0.0172396	0.27092	25	10458990	10483226	1	ric8a	RIC8 guanine nucleotide exchange factor A [Source:NCBI gene;Acc:449546]	protein_coding	ENSDART00000044738,ENSDART00000130354
ENSDARG00000094732		22.7856		25.0019	641	27.2702	585	27.4396	548		14.462	312	20.8971	401	21.6426	410		26.5706	19.0006	1.42464	0.510594	0.0172419	0.27092	4	9724192	9764769	-1	mical3b	Danio rerio microtubule associated monooxygenase, calponin and LIM domain containing 3b (mical3b), mRNA. [Source:RefSeq mRNA;Acc:NM_001353875]	protein_coding	ENSDART00000147699,ENSDART00000150265,ENSDART00000164328
ENSDARG00000102565		13.0016		11.4389	293	10.9686	235	10.7807	215		13.6753	295	17.2538	331	13.8924	263		11.0628	14.9405	-1.33891	-0.42106	0.0172446	0.27092	3	12440099	12487576	1	vasnb	vasorin b [Source:ZFIN;Acc:ZDB-GENE-110714-1]	protein_coding	ENSDART00000158060,ENSDART00000182229
ENSDARG00000058180		9.06159		7.2297	185	8.63982	185	5.67803	113		12.1481	262	11.6847	224	8.98918	170		7.18252	10.9407	-1.53055	-0.614055	0.017279	0.271197	13	7387822	7414096	1	exoc3l4	exocyst complex component 3-like 4 [Source:ZFIN;Acc:ZDB-GENE-081028-71]	protein_coding	ENSDART00000148240
ENSDARG00000101300		3.90036		2.63075	67	3.37675	72	2.92656	58		4.97495	107	3.8255	73	5.66766	107		2.97802	4.8227	-1.61694	-0.693268	0.0173385	0.271857	5	54545432	54554605	-1	ssna1	Sjogren syndrome nuclear autoantigen 1 [Source:ZFIN;Acc:ZDB-GENE-081104-255]	protein_coding	ENSDART00000158069,ENSDART00000158865
ENSDARG00000055550		1.72788		2.35793	60	2.07263	44	2.42629	48		1.78172	38	0.858786	16	0.86992	16		2.28562	1.17014	2.04452	1.03176	0.0173547	0.271857	21	8533533	8538300	1	casp21	caspase 21, apoptosis-related cysteine peptidase [Source:ZFIN;Acc:ZDB-GENE-190425-1]	protein_coding	ENSDART00000077924
ENSDARG00000005894		6.62754		4.93023	126	6.77679	145	3.97712	79		7.42771	160	8.66593	166	7.98745	151		5.22805	8.02703	-1.56226	-0.643639	0.0173839	0.271865	7	38507006	38527833	1	slc7a9	solute carrier family 7 member 9 [Source:ZFIN;Acc:ZDB-GENE-080116-2]	protein_coding	ENSDART00000100479,ENSDART00000153482,ENSDART00000173468,ENSDART00000173635,ENSDART00000173830
ENSDARG00000008785		324.36		303.706	7792	284.835	6115	259.163	5180		345.724	7470	340.73	6546	412	7814		282.568	366.151	-1.29389	-0.371719	0.0174091	0.271865	25	26877705	26893006	-1	dldh	dihydrolipoamide dehydrogenase [Source:ZFIN;Acc:ZDB-GENE-040120-4]	protein_coding	ENSDART00000006709
ENSDARG00000093760		21.6582		24.7291	634	21.8208	468	28.6403	572		16.0818	347	17.8784	343	20.799	394		25.0634	18.2531	1.37412	0.45851	0.0174293	0.271865	16	27603739	27609172	1	si:ch211-197h24.9	si:ch211-197h24.9 [Source:ZFIN;Acc:ZDB-GENE-031116-15]	protein_coding	ENSDART00000136316,ENSDART00000139125
ENSDARG00000039997		390.137		290.104	7443	390.655	8387	297.133	5939		473.73	10236	387.677	7448	501.522	9512		325.964	454.31	-1.3983	-0.483678	0.0174387	0.271865	19	25088150	25149598	-1	ptp4a3a	protein tyrosine phosphatase 4A3a [Source:ZFIN;Acc:ZDB-GENE-040426-2220]	protein_coding	ENSDART00000035538,ENSDART00000148432,ENSDART00000148953,ENSDART00000149035,ENSDART00000149239,ENSDART00000150161,ENSDART00000162917,ENSDART00000175266
ENSDARG00000010432		10.0764		10.9712	281	11.9933	257	12.0814	241		9.6028	207	8.66593	166	7.14389	135		11.682	8.47087	1.37824	0.462822	0.0174393	0.271865	9	23003208	23007941	1	eaf2	ELL associated factor 2 [Source:ZFIN;Acc:ZDB-GENE-040625-179]	protein_coding	ENSDART00000021060,ENSDART00000134119,ENSDART00000134869,ENSDART00000139424
ENSDARG00000096403		1510.17		1575	40411	1815.6	38981	2373.34	47441		1081.04	23359	1512.95	29068	703.08	13335		1921.31	1099.02	1.80757	0.854052	0.0175115	0.272727	20	55169000	55169889	-1			lincRNA	ENSDART00000151198
ENSDARG00000017910		18.0432		17.2071	441	13.4371	288	15.6834	313		21.6815	468	18.555	356	21.6953	411		15.4425	20.6439	-1.33724	-0.419262	0.0175466	0.273011	24	6015299	6024466	-1	pdss1	prenyl (decaprenyl) diphosphate synthase, subunit 1 [Source:ZFIN;Acc:ZDB-GENE-030131-4430]	protein_coding	ENSDART00000040865
ENSDARG00000043467		101.33		93.0117	2386	89.3092	1917	85.7707	1714		111.878	2417	102.924	1977	125.084	2372		89.3639	113.296	-1.26452	-0.338588	0.0176497	0.274115	8	14180064	14184423	-1	ndufb11	NADH:ubiquinone oxidoreductase subunit B11 [Source:ZFIN;Acc:ZDB-GENE-050309-25]	protein_coding	ENSDART00000063817
ENSDARG00000089382		1942.34		2026.95	52007	2310.37	49604	2925.03	58469		1582.33	34191	1840.22	35356	969.118	18381		2420.78	1463.89	1.6936	0.760091	0.0176654	0.274115	5	824709	825920	-1	zgc:158463	zgc:158463 [Source:ZFIN;Acc:ZDB-GENE-070410-9]	protein_coding	ENSDART00000126982
ENSDARG00000054597		142.752		130.7	3353	131.321	2819	114.386	2286		174.169	3763	159.292	3060	146.647	2781		125.469	160.036	-1.27496	-0.350456	0.017672	0.274115	5	38786481	38824466	-1	cnot6l	CCR4-NOT transcription complex, subunit 6-like [Source:NCBI gene;Acc:553665]	protein_coding	ENSDART00000076807,ENSDART00000147121,ENSDART00000182886
ENSDARG00000025670		1.71875		0.721021	18	0.954805	20	1.67589	33		3.03125	65	1.89974	36	2.02981	38		1.11724	2.32027	-2.23818	-1.16233	0.0177019	0.274115	22	18884971	18897231	1	fstl3	follistatin-like 3 (secreted glycoprotein) [Source:ZFIN;Acc:ZDB-GENE-050913-111]	protein_coding	ENSDART00000144402,ENSDART00000186332
ENSDARG00000104027		20.4931		25.7814	661	19.166	411	32.8425	656		10.4358	225	17.1497	329	17.5829	333		25.93	15.0561	1.73837	0.797738	0.0177069	0.274115	3	48206469	48215187	1	si:ch211-207b24.4	si:ch211-207b24.4 [Source:ZFIN;Acc:ZDB-GENE-100921-9]	protein_coding	ENSDART00000161251
ENSDARG00000069735		244.333		289.87	7437	168.255	3612	614.453	12282		111.323	2405	152.213	2924	129.882	2463		357.526	131.139	2.3889	1.25634	0.0177436	0.274115	3	55093581	55094399	1	hbaa2	hemoglobin, alpha adult 2 [Source:ZFIN;Acc:ZDB-GENE-081104-38]	protein_coding	ENSDART00000101709
ENSDARG00000005690		9.63659		7.89226	202	8.59325	184	6.92869	138		13.4902	291	9.34255	179	11.5726	219		7.80473	11.4684	-1.46137	-0.547321	0.0177587	0.274115	1	54974191	54997746	-1	slc25a23a	solute carrier family 25 member 23a [Source:ZFIN;Acc:ZDB-GENE-121214-154]	protein_coding	ENSDART00000152666
ENSDARG00000032606		42.8574		46.0089	1180	44.7361	960	52.0528	1040		37.5088	810	39.0097	749	37.8284	717		47.5993	38.1156	1.24617	0.317502	0.0177642	0.274115	21	43328685	43374893	1	sept8a	septin 8a [Source:NCBI gene;Acc:321590]	protein_coding	ENSDART00000109620,ENSDART00000139668
ENSDARG00000001803		492.938		388.202	9960	250.229	5372	353.013	7056		1000.01	21608	489.482	9404	476.69	9041		330.481	655.394	-1.89465	-0.921928	0.0177835	0.274115	3	31728871	31784082	-1	kcnh6a	potassium voltage-gated channel, subfamily H (eag-related), member 6a [Source:ZFIN;Acc:ZDB-GENE-040702-5]	protein_coding	ENSDART00000090809,ENSDART00000134201
ENSDARG00000063910		594.59		470.047	12060	473.327	10162	442.511	8845		922.031	19923	513.84	9872	745.785	14145		461.962	727.219	-1.53085	-0.614337	0.0177871	0.274115	MT	8894	9058	1	mt-atp8	ATP synthase 8 [Source:NCBI gene;Acc:140520]	protein_coding	ENSDART00000093611
ENSDARG00000100154		1.35368		2.51383	64	1.60687	34	1.72592	34		0.485925	10	0.234214	4	1.55531	29		1.94887	0.758484	3.4777	1.79813	0.0178216	0.274157	11	42572242	42572982	1			lincRNA	ENSDART00000164367
ENSDARG00000096829		49.8127		62.7678	1610	48.3225	1037	73.2641	1464		28.1605	608	36.4594	700	49.9018	946		61.4514	38.1739	1.63318	0.707683	0.0178238	0.274157	18	46151505	46160108	1	blvrb	biliverdin reductase B [Source:ZFIN;Acc:ZDB-GENE-030131-1516]	protein_coding	ENSDART00000015034,ENSDART00000133102,ENSDART00000141287
ENSDARG00000013771		86.4972		72.6283	1863	121.167	2601	134.647	2691		55.0946	1190	56.7579	1090	78.6883	1492		109.481	63.5136	1.68947	0.756574	0.0178989	0.274992	16	29514473	29519977	1	ctss2.2	cathepsin S, ortholog 2, tandem duplicate 2 [Source:ZFIN;Acc:ZDB-GENE-050626-55]	protein_coding	ENSDART00000034102,ENSDART00000149054,ENSDART00000174895
ENSDARG00000011333		9.069		9.10046	233	12.3659	265	10.7807	215		8.02933	173	7.52088	144	6.61667	125		10.749	7.38896	1.43494	0.520995	0.0179254	0.274992	16	44788331	44878255	-1	arhgap33	Rho GTPase activating protein 33 [Source:ZFIN;Acc:ZDB-GENE-121105-12]	protein_coding	ENSDART00000154391,ENSDART00000154697,ENSDART00000154925,ENSDART00000157375,ENSDART00000185810
ENSDARG00000007745		467.174		457.147	11729	396.524	8513	388.082	7757		535.235	11565	494.374	9498	531.68	10084		413.918	520.43	-1.26009	-0.333524	0.0179475	0.274992	7	45400716	45406089	1	uqcrfs1	ubiquinol-cytochrome c reductase, Rieske iron-sulfur polypeptide 1 [Source:ZFIN;Acc:ZDB-GENE-040426-2060]	protein_coding	ENSDART00000006868
ENSDARG00000056181		8.42309		8.82764	226	11.5741	248	10.4806	209		5.11378	110	8.82207	169	5.72039	108		10.2941	6.55208	1.60722	0.684567	0.0179569	0.274992	21	23338059	23746947	-1	ncam1a	neural cell adhesion molecule 1a [Source:ZFIN;Acc:ZDB-GENE-990415-31]	protein_coding	ENSDART00000017229,ENSDART00000101117,ENSDART00000132570,ENSDART00000143661,ENSDART00000145469,ENSDART00000156658,ENSDART00000157454
ENSDARG00000054312		11.5732		13.3097	341	12.6453	271	13.182	263		9.6028	207	9.70688	186	10.9926	208		13.0457	10.1008	1.29642	0.374536	0.0179846	0.274992	13	31687973	31707870	1	slc38a6	solute carrier family 38 member 6 [Source:NCBI gene;Acc:336741]	protein_coding	ENSDART00000076479
ENSDARG00000103697		54.7558		44.6449	1145	49.3006	1058	48.6509	972		53.66	1159	69.3014	1331	62.977	1194		47.5321	61.9795	-1.29812	-0.376427	0.017989	0.274992	7	10701732	10877536	1	arnt2	aryl-hydrocarbon receptor nuclear translocator 2 [Source:NCBI gene;Acc:64277]	protein_coding	ENSDART00000158162,ENSDART00000160229,ENSDART00000164258,ENSDART00000167323,ENSDART00000171385
ENSDARG00000052840		62.2636		57.6622	1479	51.117	1097	55.0544	1100		69.1633	1494	63.0036	1210	77.5811	1471		54.6112	69.916	-1.27717	-0.352946	0.0179971	0.274992	5	40485503	40501732	1	ndufs4	NADH:ubiquinone oxidoreductase subunit S4 [Source:ZFIN;Acc:ZDB-GENE-050522-421]	protein_coding	ENSDART00000051055
ENSDARG00000101631		203.951		189.473	4861	168.488	3617	180.621	3610		244.374	5280	204.209	3923	236.539	4486		179.527	228.374	-1.26974	-0.344537	0.0181064	0.2762	25	32755485	32787247	1	etfa	electron transfer flavoprotein subunit alpha [Source:ZFIN;Acc:ZDB-GENE-030131-4449]	protein_coding	ENSDART00000162188
ENSDARG00000015349		11.9419		12.9979	333	14.9741	321	13.4322	268		8.44584	182	10.1233	194	11.678	221		13.8014	10.0824	1.38338	0.468192	0.0181456	0.2762	7	48788147	48805181	-1	mfge8a	milk fat globule-EGF factor 8 protein a [Source:ZFIN;Acc:ZDB-GENE-050327-9]	protein_coding	ENSDART00000015884
ENSDARG00000008473		1.67055		1.03281	26	0.861654	18	1.67589	33		2.10567	45	2.21202	42	2.13526	40		1.19012	2.15099	-1.90138	-0.927046	0.0181507	0.2762	11	42585138	42599018	1	asb14a	ankyrin repeat and SOCS box containing 14a [Source:ZFIN;Acc:ZDB-GENE-140106-2]	protein_coding	ENSDART00000019008,ENSDART00000167529
ENSDARG00000020395		134.658		122.281	3137	122.006	2619	98.0773	1960		131.824	2848	172.824	3320	160.935	3052		114.121	155.195	-1.3585	-0.44201	0.0181531	0.2762	25	16194450	16309747	1	mical2b	microtubule associated monooxygenase, calponin and LIM domain containing 2b [Source:NCBI gene;Acc:569564]	protein_coding	ENSDART00000109672,ENSDART00000139013,ENSDART00000141994,ENSDART00000158582,ENSDART00000161109,ENSDART00000185592,ENSDART00000190093
ENSDARG00000034700		140.446		130.193	3340	113.389	2434	114.136	2281		132.796	2869	176.78	3396	175.381	3326		119.239	161.652	-1.34712	-0.429874	0.0181616	0.2762	4	5568688	5597802	-1	vegfab	vascular endothelial growth factor Ab [Source:ZFIN;Acc:ZDB-GENE-030131-4605]	protein_coding	ENSDART00000109854,ENSDART00000132431,ENSDART00000136229
ENSDARG00000038456		30.8786		28.9383	742	27.4565	589	26.4391	528		35.056	757	32.3476	621	35.0341	664		27.6113	34.1459	-1.23585	-0.3055	0.0182189	0.276481	25	2333258	2355107	-1	mrps35	mitochondrial ribosomal protein S35 [Source:NCBI gene;Acc:503880]	protein_coding	ENSDART00000056121
ENSDARG00000075853		51.9736		53.5309	1373	60.2459	1293	59.6068	1191		49.68	1073	45.2554	869	43.5224	825		57.7945	46.1526	1.25221	0.324479	0.0182437	0.276481	24	25794318	25903017	1	sh3kbp1	SH3-domain kinase binding protein 1 [Source:ZFIN;Acc:ZDB-GENE-091204-186]	protein_coding	ENSDART00000109809,ENSDART00000143395
ENSDARG00000062467		1.28757		1.61743	41	1.23426	26	2.6264	52		0.624761	13	0.910833	17	0.711753	13		1.82603	0.749116	2.33363	1.22258	0.0182638	0.276481	1	12172322	12193239	1	stra6l	STRA6-like [Source:ZFIN;Acc:ZDB-GENE-070410-116]	protein_coding	ENSDART00000090380,ENSDART00000132560,ENSDART00000136188,ENSDART00000141894,ENSDART00000142081,ENSDART00000146842
ENSDARG00000006220		4.02794		5.16407	132	5.33294	114	4.97765	99		3.49403	75	1.58745	30	3.61149	68		5.15822	2.89766	1.88638	0.915623	0.018288	0.276481	9	9969987	10003782	-1	ugt1ab	UDP glucuronosyltransferase 1 family, polypeptide A1 [Source:ZFIN;Acc:ZDB-GENE-071004-4]	protein_coding	ENSDART00000010246,ENSDART00000081463,ENSDART00000102448,ENSDART00000123415,ENSDART00000124423,ENSDART00000124516,ENSDART00000125852,ENSDART00000130243,ENSDART00000187315,ENSDART00000192548,ENSDART00000193475
ENSDARG00000024894		60.8213		50.7638	1302	55.1691	1184	36.4444	728		91.7935	1983	72.7886	1398	57.9683	1099		47.4591	74.1835	-1.5591	-0.640713	0.0182956	0.276481	5	72264192	72289648	-1	tbx5a	T-box transcription factor 5a [Source:NCBI gene;Acc:30071]	protein_coding	ENSDART00000037691,ENSDART00000114947
ENSDARG00000035907		15.9394		15.6871	402	20.5632	441	22.587	451		9.41769	203	10.7999	207	16.5812	314		19.6125	12.2663	1.63024	0.705087	0.0182982	0.276481	19	30633453	30684874	1	fam49al	family with sequence similarity 49 member A, like [Source:ZFIN;Acc:ZDB-GENE-040801-125]	protein_coding	ENSDART00000052124,ENSDART00000175662
ENSDARG00000039007		1425.62		1364.93	35021	1010.11	21687	980.798	19605		1387.13	29973	1591.33	30574	2219.43	42096		1118.61	1732.63	-1.53631	-0.619467	0.0183163	0.276481	23	44611864	44625579	1	eno3	enolase 3, (beta, muscle) [Source:ZFIN;Acc:ZDB-GENE-031006-5]	protein_coding	ENSDART00000132361,ENSDART00000135298,ENSDART00000135824,ENSDART00000145902,ENSDART00000145905,ENSDART00000188379
ENSDARG00000042983		22.2765		26.6778	684	22.2866	478	40.2965	805		7.98305	172	21.5737	414	14.8414	281		29.7536	14.7994	2.12901	1.09018	0.0183273	0.276481	16	24940377	24945337	-1	has1	hyaluronan synthase 1 [Source:ZFIN;Acc:ZDB-GENE-040218-2]	protein_coding	ENSDART00000154004
ENSDARG00000105300		25.5917		22.5076	577	15.3002	328	24.388	487		32.0479	692	33.0242	634	26.2821	498		20.7319	30.4514	-1.49101	-0.576292	0.0183431	0.276481	6	24296039	24301324	-1			protein_coding	ENSDART00000171401
ENSDARG00000044753		213.377		199.411	5116	189.773	4074	166.514	3328		268.67	5805	215.503	4140	240.388	4559		185.233	241.52	-1.30233	-0.3811	0.0183511	0.276481	21	15733880	15749719	1	idh3b	isocitrate dehydrogenase (NAD(+)) 3 non-catalytic subunit beta [Source:ZFIN;Acc:ZDB-GENE-040625-174]	protein_coding	ENSDART00000149371,ENSDART00000184111
ENSDARG00000075864		1.59306		1.92922	49	2.30551	49	1.97605	39		0.994989	21	1.5354	29	0.817198	15		2.07026	1.11586	1.91437	0.936868	0.0183689	0.276491	10	19026988	19093808	1	igsf9a	immunoglobulin superfamily, member 9a [Source:ZFIN;Acc:ZDB-GENE-060503-288]	protein_coding	ENSDART00000111952,ENSDART00000137456,ENSDART00000180093,ENSDART00000193538
ENSDARG00000095041		3.35947		2.59178	66	2.21235	47	2.72645	54		4.88239	105	4.55417	87	3.18971	60		2.5102	4.20875	-1.66486	-0.735405	0.018389	0.276536	9	1931440	1934086	-1			processed_transcript	ENSDART00000144231
ENSDARG00000059801		5.80683		7.42457	190	8.08091	173	5.77808	115		3.44775	74	5.07464	97	5.03499	95		7.09452	4.51913	1.60112	0.679086	0.0184224	0.276547	5	40931658	41049690	-1	pdzd2	PDZ domain containing 2 [Source:ZFIN;Acc:ZDB-GENE-060526-297]	protein_coding	ENSDART00000135030,ENSDART00000174936
ENSDARG00000103849		183.452		146.874	3768	186.14	3996	149.104	2980		206.657	4465	201.971	3880	209.967	3982		160.706	206.198	-1.2906	-0.368036	0.0184239	0.276547	17	24439532	24444402	1	mdh1ab	malate dehydrogenase 1Ab, NAD (soluble) [Source:ZFIN;Acc:ZDB-GENE-030131-7655]	polymorphic_pseudogene	ENSDART00000168926
ENSDARG00000020788		1.47162		1.92922	49	1.65344	35	2.17616	43		0.763596	16	0.962881	18	1.34442	25		1.91961	1.02363	1.92758	0.946792	0.0185012	0.276863	23	14808221	14830627	-1	sla2	Src-like-adaptor 2 [Source:ZFIN;Acc:ZDB-GENE-080204-98]	protein_coding	ENSDART00000134659,ENSDART00000146900,ENSDART00000188009
ENSDARG00000069430		3.40553		4.30664	110	4.21512	90	4.42736	88		1.45777	31	2.8366	54	3.18971	60		4.31637	2.49469	1.85581	0.892048	0.018526	0.276863	7	26649319	26704609	1	tp53i11a	tumor protein p53 inducible protein 11a [Source:ZFIN;Acc:ZDB-GENE-050306-58]	protein_coding	ENSDART00000101053,ENSDART00000173823
ENSDARG00000042469		126.938		115.032	2951	113.296	2432	105.181	2102		160.471	3467	127.907	2457	139.741	2650		111.17	142.706	-1.27903	-0.355046	0.0185342	0.276863	4	25829841	25836684	-1	ndufa12	NADH:ubiquinone oxidoreductase subunit A12 [Source:ZFIN;Acc:ZDB-GENE-050828-1]	protein_coding	ENSDART00000142491
ENSDARG00000013409		1.7505		1.22768	31	1.28084	27	1.42576	28		2.42962	52	2.00383	38	2.13526	40		1.31143	2.18957	-1.68067	-0.74904	0.018554	0.276863	17	4227254	4231532	-1	bmp2a	bone morphogenetic protein 2a [Source:ZFIN;Acc:ZDB-GENE-980526-388]	protein_coding	ENSDART00000019364
ENSDARG00000034685		15.373		18.4153	472	18.3276	393	16.2337	324		10.7135	231	14.3391	275	14.2087	269		17.6588	13.0871	1.36799	0.452062	0.0185707	0.276863	6	13779857	13870158	1	tmem198b	transmembrane protein 198b [Source:NCBI gene;Acc:564608]	protein_coding	ENSDART00000043522,ENSDART00000154793,ENSDART00000182899
ENSDARG00000019702		404.684		410.924	10543	311.243	6682	283.726	5671		404.174	8733	494.426	9499	523.613	9931		335.298	474.071	-1.42414	-0.510087	0.018602	0.276863	21	39608637	39639954	-1	aldocb	aldolase C, fructose-bisphosphate, b [Source:NCBI gene;Acc:369193]	protein_coding	ENSDART00000026766,ENSDART00000183995
ENSDARG00000070428		9.73816		11.6727	299	10.27	220	12.8318	256		9.88047	213	7.1045	136	6.66939	126		11.5915	7.88479	1.47371	0.559456	0.0186048	0.276863	16	28861342	28878080	-1	si:dkey-222b8.1	si:dkey-222b8.1 [Source:ZFIN;Acc:ZDB-GENE-060503-248]	protein_coding	ENSDART00000047862,ENSDART00000149501
ENSDARG00000017199		6.21237		7.19072	184	6.54391	140	8.12933	162		5.25262	113	5.43898	104	4.71866	89		7.28799	5.13675	1.41103	0.496746	0.0186078	0.276863	19	34691645	34742440	-1	elp2	elongator acetyltransferase complex subunit 2 [Source:NCBI gene;Acc:560338]	protein_coding	ENSDART00000122625,ENSDART00000175621
ENSDARG00000105592		633.626		746.413	19151	769.038	16511	677.286	13538		432.913	9354	542.779	10428	633.328	12012		730.912	536.34	1.37694	0.461463	0.018629	0.276863	19	7966116	7968667	1			lincRNA	ENSDART00000173530
ENSDARG00000005789		30.8676		30.848	791	32.2072	691	51.4024	1027		19.3676	418	26.258	504	25.1222	476		38.1525	23.5826	1.58838	0.667553	0.0186379	0.276863	20	13403281	13521010	1	enpp1	ectonucleotide pyrophosphatase/phosphodiesterase 1 [Source:ZFIN;Acc:ZDB-GENE-040724-172]	protein_coding	ENSDART00000045183,ENSDART00000127350,ENSDART00000131311,ENSDART00000137431,ENSDART00000152331,ENSDART00000152395
ENSDARG00000009026		18.0234		12.9979	333	17.3495	372	7.17883	143		21.8203	471	18.3468	352	30.4472	577		12.5087	23.5381	-1.93723	-0.953996	0.0186574	0.276863	1	14073891	14158563	1	ank2a	ankyrin 2a, neuronal [Source:ZFIN;Acc:ZDB-GENE-111215-3]	protein_coding	ENSDART00000021693
ENSDARG00000036376		1.55818		1.14974	29	0.582198	12	1.32571	26		2.10567	45	2.47226	47	1.71348	32		1.01921	2.09714	-2.15456	-1.10739	0.018664	0.276863	7	22616212	22626853	1	cldn7a	claudin 7a [Source:NCBI gene;Acc:436612]	protein_coding	ENSDART00000052844,ENSDART00000135972
ENSDARG00000022845		28.7723		26.5609	681	25.5469	548	22.1868	443		35.3337	763	28.2879	543	34.7177	658		24.7649	32.7798	-1.31926	-0.399727	0.01867	0.276863	1	23274710	23283468	1	lias	lipoic acid synthetase [Source:NCBI gene;Acc:393528]	protein_coding	ENSDART00000036448,ENSDART00000144792
ENSDARG00000076721		7.04389		11.7897	302	6.03158	129	9.98032	199		4.83611	104	5.80331	111	3.82238	72		9.26719	4.8206	1.89364	0.921163	0.0186982	0.276863	22	9939901	9945637	1	zgc:171686	zgc:171686 [Source:ZFIN;Acc:ZDB-GENE-080220-56]	protein_coding	ENSDART00000081420,ENSDART00000169777
ENSDARG00000068432		32.1831		32.6408	837	40.7772	875	42.0474	840		19.6452	424	24.9048	478	33.0833	627		38.4885	25.8778	1.51583	0.600109	0.0187227	0.276863	7	44713135	44717498	1	si:dkey-56m19.5	si:dkey-56m19.5 [Source:ZFIN;Acc:ZDB-GENE-030131-226]	protein_coding	ENSDART00000170721,ENSDART00000184630
ENSDARG00000056691		33.1164		28.2367	724	28.9935	622	30.3412	606		32.9272	711	39.6863	762	38.5137	730		29.1905	37.0424	-1.26532	-0.339505	0.0187542	0.276863	14	24096588	24111292	-1	cpeb4a	cytoplasmic polyadenylation element binding protein 4a [Source:NCBI gene;Acc:393956]	protein_coding	ENSDART00000079226,ENSDART00000123152,ENSDART00000124255,ENSDART00000133522,ENSDART00000136218,ENSDART00000143695,ENSDART00000177062,ENSDART00000181415,ENSDART00000186611
ENSDARG00000075618		8.55431		9.13943	234	11.2481	241	9.58011	191		7.79794	168	7.31269	140	6.24761	118		9.9892	7.11941	1.39506	0.480332	0.018763	0.276863	14	25986895	26067872	1	slc36a1	solute carrier family 36 member 1 [Source:ZFIN;Acc:ZDB-GENE-061117-1]	protein_coding	ENSDART00000149087
ENSDARG00000006420		44.7246		46.8664	1202	51.0239	1095	49.9516	998		39.9615	863	41.8723	804	38.6719	733		49.2806	40.1686	1.22663	0.294696	0.0187767	0.276863	12	29842836	30032188	-1	atrnl1b	attractin-like 1b [Source:ZFIN;Acc:ZDB-GENE-030131-8092]	protein_coding	ENSDART00000042514
ENSDARG00000055455		43.3614		31.2378	801	40.3114	865	34.2433	684		41.3499	893	49.6274	953	63.3987	1202		35.2641	51.4587	-1.44533	-0.531399	0.0187852	0.276863	14	36348549	36378494	-1	gpm6aa	glycoprotein M6Aa [Source:ZFIN;Acc:ZDB-GENE-030710-7]	protein_coding	ENSDART00000058503,ENSDART00000173006
ENSDARG00000071876		14.0439		19.7404	506	13.5769	291	18.735	374		7.61282	164	13.9748	268	10.6236	201		17.3507	10.7371	1.66229	0.733176	0.0187875	0.276863	14	9456675	9475845	1	rell2	RELT like 2 [Source:ZFIN;Acc:ZDB-GENE-060421-6581]	protein_coding	ENSDART00000063559,ENSDART00000134935
ENSDARG00000041599		126.933		119.475	3065	110.92	2381	105.982	2118		127.659	2758	146.54	2815	151.023	2864		112.126	141.741	-1.2625	-0.336287	0.0188423	0.277343	18	17428258	17461796	1	zgc:91860	zgc:91860 [Source:ZFIN;Acc:ZDB-GENE-040704-34]	protein_coding	ENSDART00000010452,ENSDART00000100223
ENSDARG00000103642		1.65497		1.53948	39	1.00138	21	0.625333	12		2.56846	55	1.7436	33	2.45159	46		1.0554	2.25455	-2.19972	-1.13732	0.0188544	0.277343	3	13624815	13633331	1	pglyrp6	peptidoglycan recognition protein 6 [Source:ZFIN;Acc:ZDB-GENE-071227-2]	protein_coding	ENSDART00000161451
ENSDARG00000098398		9.23061		10.6594	273	11.1549	239	9.78021	195		8.02933	173	8.45774	162	7.30206	138		10.5315	7.92971	1.32984	0.411251	0.0189608	0.278485	9	56443416	56459826	1		poly [ADP-ribose] polymerase 14 [Source:NCBI gene;Acc:100148704]	protein_coding	ENSDART00000167947,ENSDART00000187725
ENSDARG00000040076		5.54436		5.35894	137	7.94119	170	7.42896	148		4.78983	103	4.29393	82	3.45332	65		6.9097	4.17903	1.61652	0.692889	0.0189665	0.278485	16	41984032	41990421	-1	pycard	PYD and CARD domain containing [Source:NCBI gene;Acc:57923]	protein_coding	ENSDART00000055921
ENSDARG00000074732		1.2048		2.63075	67	1.9329	41	1.02555	20		0.115696	2	0.390357	7	1.13353	21		1.86307	0.546529	4.96613	2.31212	0.0190473	0.279419	10	8481660	8484001	1		C-type lectin domain family 12 member B-like [Source:NCBI gene;Acc:101882781]	protein_coding	ENSDART00000109559
ENSDARG00000070723		186.668		176.299	4523	155.866	3346	145.252	2903		210.544	4549	184.066	3536	247.98	4703		159.139	214.197	-1.34042	-0.422685	0.0190768	0.279596	25	16772392	16782394	-1	ndufa9a	NADH:ubiquinone oxidoreductase subunit A9a [Source:ZFIN;Acc:ZDB-GENE-050320-20]	protein_coding	ENSDART00000019413,ENSDART00000129857,ENSDART00000151863
ENSDARG00000059629		8.87126		9.72404	249	10.1303	217	10.4806	209		6.91864	149	8.1975	157	7.77656	147		10.1116	7.6309	1.32886	0.410189	0.0191438	0.280012	8	39965117	39984593	-1	asphd2	aspartate beta-hydroxylase domain containing 2 [Source:NCBI gene;Acc:569819]	protein_coding	ENSDART00000083066,ENSDART00000140127,ENSDART00000141707
ENSDARG00000095236		26.8529		32.9526	845	30.7634	660	26.7393	534		22.5145	486	23.4475	450	24.7005	468		30.1517	23.5541	1.27885	0.35485	0.019145	0.280012	22	13711434	13716585	-1			processed_transcript	ENSDART00000131344,ENSDART00000133853,ENSDART00000137618,ENSDART00000138683,ENSDART00000138984,ENSDART00000143328,ENSDART00000144857
ENSDARG00000071555		9.96035		11.361	291	11.3412	243	12.0314	240		6.59469	142	9.60279	184	8.83101	167		11.5779	8.34283	1.41252	0.49827	0.0191681	0.280012	22	812848	817479	-1	zgc:153675	zgc:153675 [Source:ZFIN;Acc:ZDB-GENE-061013-567]	protein_coding	ENSDART00000122722,ENSDART00000123487
ENSDARG00000063011		29.3295		16.6225	426	32.5332	698	15.4833	309		33.2511	718	32.1394	617	45.9476	871		21.5463	37.1127	-1.80477	-0.851815	0.0191907	0.280012	10	9195190	9219663	1	antxr2b	ANTXR cell adhesion molecule 2b [Source:ZFIN;Acc:ZDB-GENE-080213-4]	protein_coding	ENSDART00000136364
ENSDARG00000090156		1.34482		1.77332	45	1.70002	36	1.67589	33		1.08755	23	1.01493	19	0.817198	15		1.71641	0.973224	1.77277	0.826002	0.0191917	0.280012	6	11078693	11091449	-1	pttg1ipa	PTTG1 interacting protein a [Source:ZFIN;Acc:ZDB-GENE-030131-505]	protein_coding	ENSDART00000127209
ENSDARG00000005924		206.031		164.646	4224	208.497	4476	170.216	3402		227.019	4905	231.378	4445	234.43	4446		181.12	230.943	-1.28203	-0.358427	0.0192232	0.280219	20	27371394	27381691	-1	serpina10a	serpin peptidase inhibitor, clade A (alpha-1 antiproteinase, antitrypsin), member 10a [Source:ZFIN;Acc:ZDB-GENE-041014-246]	protein_coding	ENSDART00000010293
ENSDARG00000019404		284.509		269.759	6921	246.643	5295	237.952	4756		336.561	7272	287.017	5514	329.12	6242		251.451	317.566	-1.2617	-0.335371	0.0192699	0.280646	22	18766061	18779232	-1	atp5f1d	ATP synthase F1 subunit delta [Source:ZFIN;Acc:ZDB-GENE-030131-7649]	protein_coding	ENSDART00000019235,ENSDART00000186726
ENSDARG00000104440		1.08493		1.03281	26	2.30551	49	1.37573	27		0.485925	10	0.650595	12	0.659031	12		1.57135	0.598517	2.47947	1.31003	0.0193184	0.281046	7	53215678	53231081	1	cdh30	cadherin 30 [Source:ZFIN;Acc:ZDB-GENE-110406-4]	protein_coding	ENSDART00000170008
ENSDARG00000073957		10.1854		6.37227	163	9.19874	197	5.82811	116		18.8585	407	9.91507	190	10.9399	207		7.13304	13.2378	-1.83589	-0.876476	0.0193464	0.281046	7	36898622	36969256	1	tox3	TOX high mobility group box family member 3 [Source:ZFIN;Acc:ZDB-GENE-090312-209]	protein_coding	ENSDART00000113342,ENSDART00000190773
ENSDARG00000028618		426.083		451.535	11585	469.601	10082	582.285	11639		272.835	5895	390.019	7493	390.225	7401		501.14	351.026	1.43791	0.523972	0.0193495	0.281046	6	39360377	39365467	1	krt18b	keratin 18b [Source:ZFIN;Acc:ZDB-GENE-040426-1508]	protein_coding	ENSDART00000028260,ENSDART00000151322
ENSDARG00000016773		25.7119		22.1958	569	18.5139	397	20.1357	402		27.7903	600	40.9355	786	24.7005	468		20.2818	31.1421	-1.49951	-0.584493	0.0194557	0.281844	11	17959507	17964525	-1	cishb	cytokine inducible SH2-containing protein b [Source:ZFIN;Acc:ZDB-GENE-080204-120]	protein_coding	ENSDART00000018948
ENSDARG00000054433		17.5341		20.286	520	18.7934	403	19.2353	384		15.6653	338	15.276	293	15.9485	302		19.4382	15.6299	1.24444	0.315498	0.0194589	0.281844	5	35744623	35754882	1	yipf6	Yip1 domain family, member 6 [Source:NCBI gene;Acc:415186]	protein_coding	ENSDART00000076627,ENSDART00000148213
ENSDARG00000044254		93.3341		119.085	3055	100.86	2165	94.4253	1887		79.8074	1724	84.2911	1619	81.5353	1546		104.79	81.8779	1.27377	0.349104	0.0194606	0.281844	10	9247593	9269733	-1	anxa3b	annexin A3b [Source:ZFIN;Acc:ZDB-GENE-041114-128]	protein_coding	ENSDART00000064974,ENSDART00000141781,ENSDART00000144224
ENSDARG00000011410		6.92935		6.13842	157	4.54115	97	5.27781	105		8.307	179	6.68812	128	10.6236	201		5.31913	8.53956	-1.57612	-0.656379	0.0194742	0.281844	7	7675685	7695955	-1	aadat	aminoadipate aminotransferase [Source:ZFIN;Acc:ZDB-GENE-111229-1]	protein_coding	ENSDART00000019527,ENSDART00000183352,ENSDART00000192619
ENSDARG00000045888		149.559		141.418	3628	133.789	2872	126.993	2538		159.406	3444	161.738	3107	174.01	3300		134.066	165.052	-1.23147	-0.300377	0.0195052	0.28204	10	38663917	38698966	1	acat1	acetyl-CoA acetyltransferase 1 [Source:NCBI gene;Acc:445290]	protein_coding	ENSDART00000170182
ENSDARG00000043126		5.97209		10.1528	260	5.93842	127	6.57851	131		3.67915	79	4.55417	87	4.92955	93		7.55656	4.38762	1.72469	0.786336	0.0195352	0.282221	22	9917007	9923692	1	blf	bloody fingers [Source:ZFIN;Acc:ZDB-GENE-050721-1]	protein_coding	ENSDART00000063318,ENSDART00000105924,ENSDART00000177953
ENSDARG00000045129		33.821		34.3557	881	44.3635	952	44.1485	882		19.1825	414	25.8416	496	35.0341	664		40.9559	26.6861	1.57549	0.655804	0.0196097	0.283045	12	13905286	13957037	1	fkbp10b	FKBP prolyl isomerase 10b [Source:ZFIN;Acc:ZDB-GENE-030131-3101]	protein_coding	ENSDART00000066367,ENSDART00000147186
ENSDARG00000086458		25.5269		28.0419	719	28.3414	608	31.892	637		19.7841	427	18.4509	354	26.6512	505		29.4251	21.6287	1.37679	0.461313	0.0196876	0.283915	25	5015019	5033064	1	hdac10	histone deacetylase 10 [Source:NCBI gene;Acc:327253]	protein_coding	ENSDART00000127600
ENSDARG00000003655		5.06352		6.52816	167	5.05348	108	6.92869	138		3.1238	67	4.45007	85	4.29688	81		6.17011	3.95692	1.57675	0.656956	0.0197688	0.284612	22	21128113	21150845	-1	tmem59l	transmembrane protein 59-like [Source:ZFIN;Acc:ZDB-GENE-040426-2651]	protein_coding	ENSDART00000027345
ENSDARG00000075405		21.4062		19.1558	491	16.744	359	18.5849	371		29.1786	630	23.4475	450	21.3262	404		18.1616	24.6508	-1.34948	-0.432403	0.0197884	0.284612	19	11855330	11894064	1	adck5	aarF domain containing kinase 5 [Source:ZFIN;Acc:ZDB-GENE-081104-149]	protein_coding	ENSDART00000145380
ENSDARG00000045514		474.903		441.401	11325	394.847	8477	392.534	7846		511.771	11058	479.437	9211	629.427	11938		409.594	540.212	-1.31205	-0.391824	0.0197887	0.284612	4	25173299	25181552	-1	atp5f1c	ATP synthase F1 subunit gamma [Source:ZFIN;Acc:ZDB-GENE-030131-8901]	protein_coding	ENSDART00000066930
ENSDARG00000012840		7.03256		7.61944	195	8.6864	186	7.92923	158		5.80796	125	6.1156	117	6.03672	114		8.07836	5.98676	1.34592	0.42859	0.019848	0.285053	5	57743815	57763179	1	alg9	ALG9 alpha-1,2-mannosyltransferase [Source:ZFIN;Acc:ZDB-GENE-040426-1270]	protein_coding	ENSDART00000005090
ENSDARG00000039452		327.944		312.514	8018	275.752	5920	270.169	5400		331.84	7170	362.173	6958	415.216	7875		286.145	369.743	-1.28968	-0.367019	0.0198608	0.285053	13	22972888	23007813	-1	hk1	hexokinase 1 [Source:ZFIN;Acc:ZDB-GENE-040426-2848]	protein_coding	ENSDART00000057638
ENSDARG00000093188		11.443		9.91891	254	9.61792	206	10.2805	205		11.8705	256	14.0268	269	12.9434	245		9.9391	12.9469	-1.29829	-0.376609	0.0198871	0.285053	8	46327350	46348590	1	si:dkey-75a21.2	si:dkey-75a21.2 [Source:ZFIN;Acc:ZDB-GENE-030131-6823]	protein_coding	ENSDART00000145618
ENSDARG00000067976		23.2533		19.1168	490	22.9852	493	19.5354	390		25.6152	553	26.9867	518	25.2804	479		20.5458	25.9608	-1.26839	-0.342996	0.0198898	0.285053	5	35561607	35679140	1	ar	androgen receptor [Source:ZFIN;Acc:ZDB-GENE-060131-1]	protein_coding	ENSDART00000098022
ENSDARG00000008097		22.986		25.3527	650	24.9414	535	25.5386	510		20.3857	440	20.793	399	20.9045	396		25.2776	20.6944	1.22174	0.288939	0.0199744	0.286011	10	1686975	1697074	-1	srsf9	serine and arginine rich splicing factor 9 [Source:ZFIN;Acc:ZDB-GENE-040426-2397]	protein_coding	ENSDART00000002985,ENSDART00000125188,ENSDART00000135144
ENSDARG00000079622		29.0696		25.3137	649	26.1524	561	22.7871	455		27.6052	596	35.5745	683	36.9848	701		24.7511	33.3882	-1.33733	-0.41935	0.0200178	0.286219	7	30135768	30174882	-1	frmd5	FERM domain containing 5 [Source:ZFIN;Acc:ZDB-GENE-060810-165]	protein_coding	ENSDART00000110409,ENSDART00000173582,ENSDART00000173591,ENSDART00000173594,ENSDART00000173636
ENSDARG00000070683		37.3262		37.9413	973	47.3444	1016	58.056	1160		17.5164	378	41.4039	795	21.6953	411		47.7805	26.8719	1.88486	0.914458	0.0200244	0.286219	25	16132580	16146851	-1	dkk3b	dickkopf WNT signaling pathway inhibitor 3b [Source:ZFIN;Acc:ZDB-GENE-061207-74]	protein_coding	ENSDART00000104043
ENSDARG00000056745		18.0044		13.3097	341	8.63982	185	15.4332	308		22.6071	488	15.7444	302	32.2925	612		12.4609	23.548	-1.86321	-0.897787	0.0200603	0.286454	18	21408794	21620816	1	necab2	N-terminal EF-hand calcium binding protein 2 [Source:ZFIN;Acc:ZDB-GENE-050706-167]	protein_coding	ENSDART00000140161,ENSDART00000144523
ENSDARG00000035858		217.214		247.622	6353	208.078	4467	300.085	5998		178.566	3858	200.566	3853	168.369	3193		251.928	182.5	1.36883	0.452946	0.0200762	0.286454	2	24548249	24554432	-1	cnn2	calponin 2 [Source:ZFIN;Acc:ZDB-GENE-030131-542]	protein_coding	ENSDART00000052061,ENSDART00000142687,ENSDART00000145145
ENSDARG00000059789		22.1226		24.9629	640	25.4071	545	26.5892	531		18.9511	409	22.4585	431	14.3669	272		25.6531	18.5922	1.40005	0.485482	0.0201213	0.286844	5	40844968	40910880	-1	parp8	poly (ADP-ribose) polymerase family, member 8 [Source:ZFIN;Acc:ZDB-GENE-060929-432]	protein_coding	ENSDART00000083467,ENSDART00000133183
ENSDARG00000058045		5.65983		5.67073	145	6.49733	139	9.02981	180		3.54031	76	4.50212	86	4.71866	89		7.06596	4.2537	1.62863	0.703655	0.020168	0.287257	16	11785967	11789108	-1	tlr21	toll-like receptor 21 [Source:ZFIN;Acc:ZDB-GENE-040220-4]	protein_coding	ENSDART00000060142,ENSDART00000190180
ENSDARG00000100773		20.773		15.843	406	14.4618	310	20.586	411		28.1605	608	25.7896	495	19.7973	375		16.9636	24.5825	-1.45816	-0.54415	0.0202229	0.287785	5	54336898	54395488	-1	zmynd19	zinc finger, MYND-type containing 19 [Source:ZFIN;Acc:ZDB-GENE-030131-4460]	protein_coding	ENSDART00000160781,ENSDART00000160965,ENSDART00000161692
ENSDARG00000088013		4.2635		3.83895	98	12.4125	266	4.22725	84		0.902432	19	1.37926	26	2.82065	53		6.82622	1.70078	3.86978	1.95225	0.0202632	0.288104	9	38427572	38433916	1	zgc:136333	zgc:136333 [Source:ZFIN;Acc:ZDB-GENE-060616-143]	protein_coding	ENSDART00000108860
ENSDARG00000053200		13.3951		15.843	406	14.555	312	15.2331	304		13.2588	286	10.4355	200	11.0454	209		15.2104	11.5799	1.3163	0.396487	0.0203333	0.288464	7	34241319	34256374	-1	dis3l	DIS3 like exosome 3'-5' exoribonuclease [Source:NCBI gene;Acc:560362]	protein_coding	ENSDART00000075176
ENSDARG00000096736		1.4627		3.60511	92	1.51372	32	2.02608	40		0.485925	10	1.11902	21	0.0263612	0		2.38163	0.54377	9.20444	3.20233	0.0203334	0.288464	12	36783721	36787770	-1			lincRNA	ENSDART00000153038,ENSDART00000153125,ENSDART00000153157,ENSDART00000153176,ENSDART00000153181,ENSDART00000153362,ENSDART00000153410,ENSDART00000191107
ENSDARG00000011841		330.481		313.138	8034	292.52	6280	283.126	5659		358.358	7743	349.682	6718	386.06	7322		296.261	364.7	-1.23116	-0.300017	0.020342	0.288464	5	30699260	30701891	1	atp5l	ATP synthase, H+ transporting, mitochondrial F0 complex, subunit g [Source:ZFIN;Acc:ZDB-GENE-030131-5177]	protein_coding	ENSDART00000012888
ENSDARG00000075793		33.6512		30.1465	773	28.9003	620	31.7419	634		37.9253	819	35.4705	681	37.7229	715		30.2629	37.0395	-1.22471	-0.292445	0.0203737	0.28866	8	25423133	25569920	-1	prex1	phosphatidylinositol-3,4,5-trisphosphate-dependent Rac exchange factor 1 [Source:ZFIN;Acc:ZDB-GENE-030131-1428]	protein_coding	ENSDART00000078022,ENSDART00000136869,ENSDART00000138289
ENSDARG00000001734		26.1358		23.365	599	24.4756	525	22.587	451		28.2531	610	29.9014	574	28.2329	535		23.4759	28.7958	-1.22638	-0.294404	0.0204041	0.288837	22	20925849	20950448	-1	fkbp8	FKBP prolyl isomerase 8 [Source:ZFIN;Acc:ZDB-GENE-040426-1849]	protein_coding	ENSDART00000002029
ENSDARG00000078419		80.5187		78.7472	2020	69.0953	1483	64.8596	1296		97.9948	2117	84.3952	1621	88.0201	1669		70.9007	90.1367	-1.27301	-0.348239	0.0204342	0.288997	17	50013594	50022827	-1	filip1a	filamin A interacting protein 1a [Source:ZFIN;Acc:ZDB-GENE-030131-4110]	protein_coding	ENSDART00000112267,ENSDART00000161008,ENSDART00000188942
ENSDARG00000037409		10.2602		12.4133	318	10.8755	233	11.7313	234		8.58467	185	9.81098	188	8.14562	154		11.6733	8.84709	1.32515	0.406155	0.0204599	0.288997	1	21313165	21321482	-1	tmem144a	transmembrane protein 144a [Source:ZFIN;Acc:ZDB-GENE-040822-12]	protein_coding	ENSDART00000054440,ENSDART00000145053
ENSDARG00000027750		69.7686		72.0047	1847	78.5968	1687	87.5217	1749		50.9296	1100	63.5241	1220	66.0349	1252		79.3744	60.1628	1.32376	0.404638	0.020469	0.288997	5	29159777	29177272	1	dpp7	dipeptidyl-peptidase 7 [Source:ZFIN;Acc:ZDB-GENE-050306-16]	protein_coding	ENSDART00000037891,ENSDART00000088827,ENSDART00000137324,ENSDART00000174702
ENSDARG00000077103		3.66939		4.15074	106	4.96033	106	4.57744	91		3.7717	81	2.36817	45	2.18798	41		4.56284	2.77595	1.66276	0.733576	0.0206128	0.290587	16	43047972	43065164	-1	sema4aa	sema domain, immunoglobulin domain (Ig), transmembrane domain (TM) and short cytoplasmic domain, (semaphorin) 4Aa [Source:ZFIN;Acc:ZDB-GENE-110411-86]	protein_coding	ENSDART00000149431
ENSDARG00000008808		22.6649		27.6132	708	30.3442	651	22.8372	456		14.5546	314	16.9415	325	23.6987	449		26.9315	18.3983	1.49333	0.578535	0.0206175	0.290587	15	28874441	28908027	-1	eml2	EMAP like 2 [Source:ZFIN;Acc:ZDB-GENE-050706-71]	protein_coding	ENSDART00000017268,ENSDART00000155154,ENSDART00000155305,ENSDART00000182790,ENSDART00000192461
ENSDARG00000103002		4.21698		6.68406	171	4.49457	96	4.52741	90		3.26264	70	3.56526	68	2.76793	52		5.23535	3.19861	1.63822	0.712125	0.0206944	0.291139	25	29315924	29363934	-1	nptna	neuroplastin a [Source:ZFIN;Acc:ZDB-GENE-030804-7]	protein_coding	ENSDART00000166889
ENSDARG00000099439		18.4548		20.7147	531	19.818	425	23.5375	470		15.1099	326	18.7632	360	12.7852	242		21.3568	15.5528	1.38459	0.469462	0.0207027	0.291139	18	3572314	3576434	1	serp1	stress-associated endoplasmic reticulum protein 1 [Source:ZFIN;Acc:ZDB-GENE-030131-8741]	protein_coding	ENSDART00000157819,ENSDART00000169814
ENSDARG00000114910		272.36		277.009	7107	337.698	7250	421.75	8430		223.502	4829	253.758	4875	120.444	2284		345.486	199.235	1.79509	0.844053	0.0207353	0.291139	7	7653	7987	1			pseudogene	ENSDART00000183213
ENSDARG00000117781		23.3052		21.0655	540	28.714	616	34.7435	694		20.432	441	18.2947	351	16.5812	314		28.1744	18.436	1.49272	0.577942	0.0207414	0.291139	14	3325867	3359054	-1			lincRNA	ENSDART00000194008,ENSDART00000194652,ENSDART00000194837
ENSDARG00000035808		16.7423		15.2973	392	14.9741	321	14.2326	284		20.0155	432	17.9825	345	17.952	340		14.8347	18.65	-1.25599	-0.328824	0.0207489	0.291139	11	44144612	44163164	-1	clcn4	chloride channel, voltage-sensitive 4 [Source:ZFIN;Acc:ZDB-GENE-061013-353]	protein_coding	ENSDART00000047126
ENSDARG00000063254		18.8189		16.6614	427	17.7221	380	14.8829	297		20.6171	445	19.7	378	23.3297	442		16.4222	21.2156	-1.28928	-0.366566	0.0207648	0.291139	11	5666325	5674923	1	r3hdm4	R3H domain containing 4 [Source:ZFIN;Acc:ZDB-GENE-070112-1352]	protein_coding	ENSDART00000092270
ENSDARG00000046007		13.0069		9.68507	248	13.1577	282	7.82917	156		15.8504	342	12.8818	247	18.6374	353		10.224	15.7899	-1.55815	-0.63983	0.0208121	0.29155	22	591809	600016	-1	tmcc2	transmembrane and coiled-coil domain family 2 [Source:ZFIN;Acc:ZDB-GENE-091202-2]	protein_coding	ENSDART00000086434
ENSDARG00000097556		1.25844		1.53948	39	1.60687	34	1.876	37		0.485925	10	1.06698	20	0.975365	18		1.67412	0.842755	2.11084	1.07782	0.020842	0.291715	2	3452590	3454556	1	cyp8b2	cytochrome P450, family 8, subfamily B, polypeptide 2 [Source:ZFIN;Acc:ZDB-GENE-080212-9]	protein_coding	ENSDART00000153935
ENSDARG00000102874		231.489		208.492	5349	204.119	4382	185.724	3712		302.87	6544	224.247	4308	263.48	4997		199.445	263.533	-1.31304	-0.392908	0.0208793	0.291979	14	16093889	16123580	1	immt	inner membrane protein, mitochondrial (mitofilin) [Source:ZFIN;Acc:ZDB-GENE-030131-5417]	protein_coding	ENSDART00000159181
ENSDARG00000086518		9.52339		7.58047	194	9.75765	209	6.47845	129		10.8986	235	10.7999	207	11.6253	220		7.93886	11.1079	-1.41534	-0.501148	0.0208969	0.291979	20	11731039	11736228	1	si:ch211-155o21.3	si:ch211-155o21.3 [Source:ZFIN;Acc:ZDB-GENE-121214-24]	protein_coding	ENSDART00000152215,ENSDART00000152585,ENSDART00000179959
ENSDARG00000045706		62.9519		58.5976	1503	51.0704	1096	48.801	975		59.7225	1290	86.7894	1667	72.7306	1379		52.823	73.0808	-1.37169	-0.455957	0.0210449	0.293534	4	9696965	9722568	-1	tspan9b	tetraspanin 9b [Source:NCBI gene;Acc:431733]	protein_coding	ENSDART00000067190
ENSDARG00000069940		32.3812		23.5209	603	26.6181	571	24.2879	485		55.4649	1198	30.8903	593	33.5051	635		24.809	39.9534	-1.56049	-0.641995	0.0210449	0.293534	3	47322494	47387377	1	ppap2d	phosphatidic acid phosphatase type 2D [Source:ZFIN;Acc:ZDB-GENE-061201-42]	protein_coding	ENSDART00000102202
ENSDARG00000059305		1.19176		1.34461	34	1.65344	35	1.82597	36		0.439646	9	0.858786	16	1.02809	19		1.60801	0.775507	2.19602	1.13489	0.0210627	0.293534	9	917060	923251	1	tmem37	transmembrane protein 37 [Source:ZFIN;Acc:ZDB-GENE-040426-2208]	protein_coding	ENSDART00000082390
ENSDARG00000026519		60.4953		51.5822	1323	60.9445	1308	45.4492	908		66.0164	1426	72.9447	1401	66.0349	1252		52.6587	68.332	-1.30554	-0.384649	0.0211459	0.29444	20	15933028	16156419	-1	ralgps2	Ral GEF with PH domain and SH3 binding motif 2 [Source:ZFIN;Acc:ZDB-GENE-040426-1212]	protein_coding	ENSDART00000021550,ENSDART00000037420
ENSDARG00000019881		758.258		728.874	18701	627.354	13469	644.719	12887		778.151	16814	831.435	15974	939.013	17810		666.982	849.533	-1.27275	-0.347944	0.0212243	0.295277	22	18929412	18946453	1	bsg	basigin [Source:ZFIN;Acc:ZDB-GENE-030131-9638]	protein_coding	ENSDART00000015951,ENSDART00000105392,ENSDART00000131131,ENSDART00000161598,ENSDART00000166650
ENSDARG00000057910		50.8861		47.412	1216	46.1334	990	40.7968	815		59.8613	1293	50.7725	975	60.3408	1144		44.7807	56.9915	-1.27116	-0.346145	0.0212503	0.295385	3	16003122	16010968	-1	mrps34	mitochondrial ribosomal protein S34 [Source:ZFIN;Acc:ZDB-GENE-041114-71]	protein_coding	ENSDART00000080672
ENSDARG00000007788		5.41597		7.61944	195	5.56582	119	6.42843	128		3.44775	74	4.29393	82	5.14044	97		6.53789	4.29404	1.55249	0.634588	0.0213674	0.296708	25	19609713	19666107	-1	atp2b1b	ATPase plasma membrane Ca2+ transporting 1b [Source:ZFIN;Acc:ZDB-GENE-080409-1]	protein_coding	ENSDART00000104353,ENSDART00000148570,ENSDART00000149585,ENSDART00000149641,ENSDART00000149889
ENSDARG00000002405		17.6968		20.364	522	18.9331	406	20.636	412		16.3595	353	16.6813	320	13.207	250		19.9777	15.4159	1.30004	0.378556	0.0213822	0.296708	5	20786772	20814588	-1	si:ch211-225b11.1	si:ch211-225b11.1 [Source:ZFIN;Acc:ZDB-GENE-060531-39]	protein_coding	ENSDART00000098682,ENSDART00000147639
ENSDARG00000041602		14.9619		13.8943	356	13.2043	283	12.5317	250		16.3132	352	17.7743	341	16.054	304		13.2101	16.7138	-1.26172	-0.33539	0.0214012	0.296717	22	12595144	12604606	1	zgc:92335	zgc:92335 [Source:ZFIN;Acc:ZDB-GENE-040718-152]	protein_coding	ENSDART00000060979,ENSDART00000139826,ENSDART00000140054,ENSDART00000140814
ENSDARG00000088072		9.83023		8.55482	219	8.73298	187	7.37893	147		9.69536	209	12.3613	237	12.258	232		8.22224	11.4382	-1.37548	-0.459938	0.0214952	0.297278	3	25546672	25646149	-1	usp43b	ubiquitin specific peptidase 43b [Source:ZFIN;Acc:ZDB-GENE-120524-2]	protein_coding	ENSDART00000122735
ENSDARG00000008186		24.9852		28.2367	724	26.1524	561	29.5407	590		23.6252	510	22.8749	439	19.4809	369		27.9766	21.9937	1.27308	0.348317	0.0215201	0.297278	10	5533843	5581487	-1	syk	spleen tyrosine kinase [Source:ZFIN;Acc:ZDB-GENE-040702-3]	protein_coding	ENSDART00000005292,ENSDART00000141943,ENSDART00000164558
ENSDARG00000092522		283.788		261.848	6718	259.824	5578	197.73	3952		380.479	8221	299.456	5753	303.391	5754		239.801	327.775	-1.36973	-0.453891	0.0215216	0.297278	18	5543677	5557060	1	nnt2	nicotinamide nucleotide transhydrogenase 2 [Source:ZFIN;Acc:ZDB-GENE-091204-5]	protein_coding	ENSDART00000136189,ENSDART00000146161,ENSDART00000184970,ENSDART00000193977
ENSDARG00000045929		203.705		178.638	4583	193.732	4159	178.27	3563		214.061	4625	227.266	4366	230.265	4367		183.547	223.864	-1.21998	-0.286862	0.0215342	0.297278	25	6186823	6206443	1	oaz2a	ornithine decarboxylase antizyme 2a [Source:ZFIN;Acc:ZDB-GENE-121005-1]	protein_coding	ENSDART00000153526,ENSDART00000154658
ENSDARG00000054300		62.8382		58.0909	1490	58.7555	1261	52.553	1050		69.3021	1497	66.2826	1273	72.0452	1366		56.4665	69.21	-1.22646	-0.294497	0.0215564	0.297278	2	38261748	38269675	1	dhrs1	dehydrogenase/reductase (SDR family) member 1 [Source:ZFIN;Acc:ZDB-GENE-030616-591]	protein_coding	ENSDART00000076478,ENSDART00000182068
ENSDARG00000062427		7.15468		6.33329	162	5.70554	122	6.17829	123		9.00118	194	8.24955	158	7.46023	141		6.07238	8.23698	-1.35559	-0.43892	0.0215813	0.297278	2	16885285	17044959	-1	clcn2a	chloride channel, voltage-sensitive 2a [Source:ZFIN;Acc:ZDB-GENE-070705-19]	protein_coding	ENSDART00000090260,ENSDART00000135579,ENSDART00000145720
ENSDARG00000075673		41.6244		37.5126	962	37.7497	810	35.644	712		41.3962	894	47.8057	918	49.6382	941		36.9688	46.28	-1.24801	-0.319635	0.0215843	0.297278	2	12302527	12406641	1	arhgap21b	Rho GTPase activating protein 21b [Source:ZFIN;Acc:ZDB-GENE-030131-4944]	protein_coding	ENSDART00000091298,ENSDART00000134083,ENSDART00000135867,ENSDART00000141074,ENSDART00000144018,ENSDART00000182569
ENSDARG00000104384		7.72958		6.56714	168	6.96309	149	3.52688	70		7.84422	169	10.7999	207	10.6763	202		5.6857	9.77346	-1.73714	-0.796716	0.0215888	0.297278	25	11389220	11706389	1	agbl1	ATP/GTP binding protein-like 1 [Source:ZFIN;Acc:ZDB-GENE-110207-1]	protein_coding	ENSDART00000163746,ENSDART00000171408,ENSDART00000187787
ENSDARG00000078283		1.18134		1.57845	40	1.70002	36	1.32571	26		0.809875	17	1.01493	19	0.659031	12		1.53473	0.827945	1.87931	0.910205	0.0216428	0.297588	6	124172	131401	-1	si:zfos-323e3.4	si:zfos-323e3.4 [Source:ZFIN;Acc:ZDB-GENE-120215-44]	protein_coding	ENSDART00000108710,ENSDART00000151251
ENSDARG00000044241		23.3036		24.6511	632	25.6866	551	26.8893	537		20.0155	432	21.9381	421	20.6408	391		25.7424	20.8648	1.23356	0.302833	0.0216481	0.297588	22	856869	866196	-1	dram2b	DNA-damage regulated autophagy modulator 2b [Source:ZFIN;Acc:ZDB-GENE-040625-141]	protein_coding	ENSDART00000146619
ENSDARG00000111998		1.42183		1.73435	44	2.1192	45	1.67589	33		0.902432	19	0.75469	14	1.34442	25		1.84315	1.00051	1.89123	0.919324	0.0217053	0.298069	4	64586627	64605318	-1	znf1099	zinc finger protein 1099 [Source:ZFIN;Acc:ZDB-GENE-060503-829]	protein_coding	ENSDART00000169862,ENSDART00000170391
ENSDARG00000007461		3.80875		3.37126	86	3.19045	68	2.37627	47		5.0675	109	4.86645	93	3.98054	75		2.97933	4.63817	-1.55524	-0.637137	0.0217199	0.298069	18	12867400	13056801	-1	srgap1a	SLIT-ROBO Rho GTPase activating protein 1a [Source:ZFIN;Acc:ZDB-GENE-050420-284]	protein_coding	ENSDART00000088908,ENSDART00000140403
ENSDARG00000103589		77.9444		74.1872	1903	65.3692	1403	61.5078	1229		96.2825	2080	95.5855	1836	74.7341	1417		67.0214	88.8674	-1.32113	-0.401775	0.0217496	0.298222	2	4207209	4217887	1	gata6	GATA binding protein 6 [Source:ZFIN;Acc:ZDB-GENE-000622-1]	protein_coding	ENSDART00000157903,ENSDART00000166476,ENSDART00000167906
ENSDARG00000100582		4.74123		7.30765	187	4.6343	99	6.97872	139		1.55033	33	2.88864	55	5.08772	96		6.30689	3.17556	2.2403	1.16369	0.0218186	0.298586	14	38786258	38791884	1	si:ch211-195b11.3	si:ch211-195b11.3 [Source:ZFIN;Acc:ZDB-GENE-141222-6]	protein_coding	ENSDART00000158499,ENSDART00000164440
ENSDARG00000062148		52.3596		72.4334	1858	51.6294	1108	61.4077	1227		33.8065	730	50.304	966	44.5768	845		61.8235	42.8958	1.4478	0.533866	0.0218244	0.298586	9	30217828	30247961	-1	si:dkey-100n23.3	si:dkey-100n23.3 [Source:ZFIN;Acc:ZDB-GENE-070912-345]	protein_coding	ENSDART00000089539,ENSDART00000131519,ENSDART00000140929
ENSDARG00000029439		3174.03		2985.59	76604	2353.18	50523	2364.44	47263		4690.73	101358	3694.42	70981	2955.8	56063		2567.73	3780.32	-1.45553	-0.541542	0.021842	0.298586	8	11687254	11744994	1	atp2a2a	ATPase sarcoplasmic/endoplasmic reticulum Ca2+ transporting 2a [Source:ZFIN;Acc:ZDB-GENE-040426-702]	protein_coding	ENSDART00000042040,ENSDART00000145436,ENSDART00000146241
ENSDARG00000053646		12.5171		19.7794	507	11.5275	247	15.8835	317		6.54842	141	11.3204	217	10.0436	190		15.7301	9.30413	1.72197	0.784057	0.02185	0.298586	8	37700090	37738751	1	adrb3a	adrenoceptor beta 3a [Source:ZFIN;Acc:ZDB-GENE-080917-21]	protein_coding	ENSDART00000127633,ENSDART00000187885
ENSDARG00000070472		64.34		69.3544	1779	66.9062	1436	80.3178	1605		61.4348	1327	57.0702	1096	50.9562	966		72.1928	56.4871	1.2777	0.353554	0.0219621	0.299865	18	7543347	7553756	1	arf5	ADP-ribosylation factor 5 [Source:ZFIN;Acc:ZDB-GENE-030910-5]	protein_coding	ENSDART00000103467
ENSDARG00000063908		18416.5		18040.2	462875	15063.5	323419	14271.9	285285		24198.6	522890	18981.7	364699	19942.8	378259		15791.9	21041	-1.33182	-0.413396	0.0220114	0.300284	MT	8130	8820	1	mt-co2	cytochrome c oxidase subunit II [Source:NCBI gene;Acc:140540]	protein_coding	ENSDART00000093609
ENSDARG00000101123		1.72953		3.72203	95	1.46714	31	2.82651	56		0.115696	2	1.6395	31	0.606308	11		2.67189	0.787168	5.41068	2.43581	0.0220333	0.30031	KN150608.1	102275	135229	1		ribonuclease inhibitor-like [Source:NCBI gene;Acc:100329836]	protein_coding	ENSDART00000164248
ENSDARG00000060222		5.12067		1.6564	42	3.05072	65	5.67803	113		5.90052	127	8.71798	167	5.72039	108		3.46172	6.77963	-2.25445	-1.17278	0.0220716	0.30031	16	41873708	41897745	1	scn1ba	sodium channel, voltage-gated, type I, beta a [Source:ZFIN;Acc:ZDB-GENE-060503-604]	protein_coding	ENSDART00000058611,ENSDART00000084631,ENSDART00000084639,ENSDART00000131491,ENSDART00000161278
ENSDARG00000005115		26.9806		29.328	752	28.9469	621	34.4434	688		27.3738	591	21.6778	416	20.1136	381		30.9061	23.0551	1.3434	0.425886	0.0220717	0.30031	18	7015283	7032227	-1	calub	calumenin b [Source:NCBI gene;Acc:394057]	protein_coding	ENSDART00000005405,ENSDART00000127138,ENSDART00000148485
ENSDARG00000024602		8.13861		9.68507	248	9.29189	199	13.4822	269		8.58467	185	5.23079	100	2.55704	48		10.8197	5.4575	2.13661	1.09532	0.0221403	0.30031	17	33375469	33386590	1	zgc:162964	zgc:162964 [Source:ZFIN;Acc:ZDB-GENE-030131-9798]	protein_coding	ENSDART00000032827
ENSDARG00000075132		295.996		273.345	7013	267.974	5753	227.596	4549		385.801	8336	314.81	6048	306.449	5812		256.305	335.687	-1.30696	-0.386217	0.022145	0.30031	12	47638430	47648538	-1	fh	fumarate hydratase [Source:NCBI gene;Acc:393938]	protein_coding	ENSDART00000108477
ENSDARG00000035161		16.4895		14.362	368	14.3221	307	10.9308	218		23.5789	509	20.5328	394	15.2104	288		13.205	19.774	-1.4824	-0.567937	0.0221646	0.30031	13	3109064	3155244	-1	pkdcca	protein kinase domain containing, cytoplasmic a [Source:ZFIN;Acc:ZDB-GENE-081107-30]	protein_coding	ENSDART00000050934,ENSDART00000139183
ENSDARG00000018529		55.5069		69.0816	1772	54.9362	1179	75.5153	1509		33.7602	729	57.1223	1097	42.6261	808		66.511	44.5029	1.51727	0.601482	0.022204	0.30031	12	17158642	17201028	-1	lipf	lipase, gastric [Source:ZFIN;Acc:ZDB-GENE-040426-2737]	protein_coding	ENSDART00000020541,ENSDART00000193292
ENSDARG00000091433		2.88598		3.13742	80	4.21512	90	3.42683	68		2.66102	57	2.00383	38	1.87165	35		3.59312	2.17883	1.6353	0.709556	0.0222075	0.30031	2	49039159	49063911	1	abhd17aa	abhydrolase domain containing 17Aa [Source:ZFIN;Acc:ZDB-GENE-030131-840]	protein_coding	ENSDART00000129704
ENSDARG00000091101		14.7519		22.2347	570	13.5303	290	20.0857	401		8.39956	181	15.5883	299	8.67284	164		18.6169	10.8869	1.7612	0.816556	0.0222094	0.30031	17	53425037	53426917	1	fabp10b	fatty acid binding protein 10b, liver basic [Source:ZFIN;Acc:ZDB-GENE-100217-2]	protein_coding	ENSDART00000127617,ENSDART00000154983
ENSDARG00000089383		9.88068		11.4389	293	11.2481	241	11.5311	230		9.41769	203	8.92617	171	6.72211	127		11.406	8.35532	1.37335	0.457694	0.0222135	0.30031	11	29965822	29972154	1	il1fma	interleukin-1 family member A [Source:ZFIN;Acc:ZDB-GENE-140106-231]	protein_coding	ENSDART00000127049
ENSDARG00000058597		203.317		166.205	4264	179.666	3857	164.513	3288		192.912	4168	225.548	4333	291.054	5520		170.128	236.505	-1.37132	-0.455561	0.0222212	0.30031	16	7214005	7239508	-1	nt5c3a	5'-nucleotidase, cytosolic IIIA [Source:NCBI gene;Acc:321720]	protein_coding	ENSDART00000148992,ENSDART00000149030,ENSDART00000149260,ENSDART00000149935,ENSDART00000187916
ENSDARG00000075821		56.1616		52.3228	1342	46.5526	999	50.0017	999		67.7749	1464	64.6692	1242	55.6485	1055		49.6257	62.6976	-1.26044	-0.333932	0.0222891	0.30031	23	9938236	10137322	-1	plxnb1a	plexin b1a [Source:ZFIN;Acc:ZDB-GENE-050302-63]	protein_coding	ENSDART00000111518,ENSDART00000131669,ENSDART00000137308,ENSDART00000142442,ENSDART00000166663
ENSDARG00000043446		44.3239		36.3823	933	42.0347	902	31.842	636		42.4143	916	51.1368	982	62.1334	1178		36.753	51.8948	-1.40309	-0.488612	0.0222939	0.30031	15	40188076	40212204	1	efhd1	EF-hand domain family, member D1 [Source:ZFIN;Acc:ZDB-GENE-030131-7461]	protein_coding	ENSDART00000063779
ENSDARG00000096696		4.57806		5.8656	150	5.00691	107	6.3784	127		2.42962	52	5.23079	100	2.55704	48		5.7503	3.40582	1.8057	0.852556	0.0223136	0.30031	12	30435416	30439544	-1		uncharacterized LOC110438050 [Source:NCBI gene;Acc:110438050]	lincRNA	ENSDART00000152840,ENSDART00000153011,ENSDART00000153044,ENSDART00000153053,ENSDART00000153095,ENSDART00000153148,ENSDART00000153326,ENSDART00000153336,ENSDART00000153378
ENSDARG00000013880		24.5321		22.7024	582	21.4016	459	20.1357	402		26.078	563	25.3732	487	31.5017	597		21.4133	27.6509	-1.28384	-0.36046	0.0223138	0.30031	12	27589607	27665591	1	spata20	spermatogenesis associated 20 [Source:ZFIN;Acc:ZDB-GENE-030131-7269]	protein_coding	ENSDART00000066288
ENSDARG00000059304		85.4927		85.1779	2185	73.9392	1587	69.5121	1389		96.3288	2081	94.2843	1811	93.7141	1777		76.2097	94.7757	-1.24821	-0.31986	0.0223252	0.30031	15	5773119	5780648	-1	chchd2	coiled-coil-helix-coiled-coil-helix domain containing 2 [Source:ZFIN;Acc:ZDB-GENE-040426-1737]	protein_coding	ENSDART00000082388,ENSDART00000163555
ENSDARG00000109996		39.3665		31.7834	815	34.1168	732	23.1874	463		59.3985	1283	54.2076	1041	33.5051	635		29.6959	49.0371	-1.62246	-0.698179	0.0223364	0.30031	19	43123331	43134843	1			protein_coding	ENSDART00000187836
ENSDARG00000102228		4.84649		5.51484	141	5.33294	114	6.52848	130		3.26264	70	3.7214	71	4.71866	89		5.79209	3.9009	1.49874	0.583749	0.0223696	0.30031	7	22968756	22981796	-1	si:dkey-171c9.3	si:dkey-171c9.3 [Source:ZFIN;Acc:ZDB-GENE-141216-372]	protein_coding	ENSDART00000167565
ENSDARG00000013623		1300.31		1244	31918	1156.64	24833	1072.35	21435		1369.64	29595	1407.45	27041	1551.81	29433		1157.66	1442.96	-1.24705	-0.31852	0.0224284	0.30031	13	17714296	17729474	-1	vdac2	voltage-dependent anion channel 2 [Source:ZFIN;Acc:ZDB-GENE-030131-845]	protein_coding	ENSDART00000013011,ENSDART00000183834
ENSDARG00000040133		111.991		135.883	3486	121.679	2612	121.64	2431		88.5077	1912	114.635	2202	89.6018	1699		126.401	97.5815	1.30287	0.381694	0.022456	0.30031	24	11381400	11390669	1	ackr4b	atypical chemokine receptor 4b [Source:ZFIN;Acc:ZDB-GENE-051107-10]	protein_coding	ENSDART00000058703
ENSDARG00000061819		15.971		14.2061	364	15.4399	331	9.12987	182		17.285	373	19.3877	372	20.3772	386		12.9253	19.0167	-1.49012	-0.575428	0.0224673	0.30031	5	20627200	20678300	-1	wscd2	WSC domain containing 2 [Source:NCBI gene;Acc:561091]	protein_coding	ENSDART00000088639
ENSDARG00000088937		0.954813		1.69537	43	1.28084	27	1.1256	22		0.161975	3	0.858786	16	0.606308	11		1.36727	0.542356	3.19688	1.67666	0.0224696	0.30031	10	35347993	35361366	1	si:dkey-259j3.5	si:dkey-259j3.5 [Source:ZFIN;Acc:ZDB-GENE-091204-113]	protein_coding	ENSDART00000123936,ENSDART00000131350,ENSDART00000193263
ENSDARG00000015757		98.4122		105.912	2717	107.52	2308	109.433	2187		86.6566	1872	92.9831	1786	87.9674	1668		107.622	89.2024	1.20695	0.271367	0.0224857	0.30031	13	45485185	45495562	1	tmem50a	transmembrane protein 50A [Source:ZFIN;Acc:ZDB-GENE-040426-2937]	protein_coding	ENSDART00000019774,ENSDART00000133635,ENSDART00000134730,ENSDART00000142381,ENSDART00000188004
ENSDARG00000023672		15.869		14.0891	361	12.7851	274	15.1331	302		18.2569	394	16.6813	320	18.2683	346		14.0024	17.7355	-1.27001	-0.344845	0.0224888	0.30031	14	38878482	38881818	1	timm8a	translocase of inner mitochondrial membrane 8 homolog A (yeast) [Source:NCBI gene;Acc:445243]	protein_coding	ENSDART00000043317
ENSDARG00000058693		426.582		385.668	9895	384.321	8251	366.921	7334		528.154	11412	456.119	8763	438.308	8313		378.97	474.194	-1.24744	-0.318966	0.0224938	0.30031	21	11565888	11657043	-1	cast	calpastatin [Source:ZFIN;Acc:ZDB-GENE-050810-2]	protein_coding	ENSDART00000081614,ENSDART00000131448,ENSDART00000132699,ENSDART00000133171,ENSDART00000133443,ENSDART00000135858,ENSDART00000135937,ENSDART00000136308,ENSDART00000138619,ENSDART00000138989,ENSDART00000139289,ENSDART00000139814,ENSDART00000141297,ENSDART00000144370,ENSDART00000144770,ENSDART00000148097,ENSDART00000162426,ENSDART00000171708,ENSDART00000183811
ENSDARG00000063899		5123.95		4845.55	124327	4104.8	88131	3944.98	78857		7138.91	154259	4957.41	95247	5752.05	109100		4298.44	5949.45	-1.3741	-0.458486	0.0224963	0.30031	MT	4993	6039	1	mt-nd2	NADH dehydrogenase subunit 2 [Source:NCBI gene;Acc:140532]	protein_coding	ENSDART00000093600
ENSDARG00000097048		11.8612		14.245	365	12.6919	272	14.1325	282		7.93677	171	10.8519	208	11.309	214		13.6898	10.0326	1.38943	0.474494	0.0225657	0.30097	23	250798	253229	-1			lincRNA	ENSDART00000155830
ENSDARG00000100426		35.1799		29.1332	747	28.8538	619	31.892	637		37.7402	815	48.7426	936	34.7177	658		29.9596	40.4002	-1.33613	-0.418065	0.022583	0.30097	17	25392524	25397558	-1	fam167b	family with sequence similarity 167 member B [Source:ZFIN;Acc:ZDB-GENE-131121-390]	protein_coding	ENSDART00000170233,ENSDART00000182052
ENSDARG00000060263		29.9433		25.1188	644	28.5277	612	24.8883	497		32.1405	694	30.7341	590	38.2501	725		26.1783	33.7082	-1.28409	-0.36075	0.0226325	0.301382	3	59784632	59822428	1	pecam1	platelet/endothelial cell adhesion molecule 1 [Source:ZFIN;Acc:ZDB-GENE-130530-689]	protein_coding	ENSDART00000084729
ENSDARG00000097456		22.3488		19.4286	498	17.8618	383	18.2847	365		32.557	703	21.3655	410	24.595	466		18.5251	26.1725	-1.39388	-0.47911	0.0226733	0.3015	3	22426714	22432428	1	coa3b	cytochrome C oxidase assembly factor 3b [Source:ZFIN;Acc:ZDB-GENE-030131-7433]	protein_coding	ENSDART00000154966
ENSDARG00000046092		4.87826		7.46354	191	6.07815	130	5.32784	106		2.15195	46	2.26407	43	5.984	113		6.28985	3.46667	2.07406	1.05246	0.0227172	0.3015	5	4232196	4245186	-1	si:ch211-283g2.3	si:ch211-283g2.3 [Source:ZFIN;Acc:ZDB-GENE-060526-152]	protein_coding	ENSDART00000145912,ENSDART00000180015
ENSDARG00000100002		9.11151		9.99686	256	10.4097	223	11.8813	237		8.72351	188	7.93726	152	5.72039	108		10.7626	7.46039	1.44675	0.53282	0.0227423	0.3015	11	16070438	16083608	1	ctbs	chitobiase, di-N-acetyl- [Source:ZFIN;Acc:ZDB-GENE-050522-422]	polymorphic_pseudogene	ENSDART00000162972
ENSDARG00000070801		131.726		121.931	3128	116.929	2510	114.336	2285		155.334	3356	132.279	2541	149.547	2836		117.732	145.72	-1.23532	-0.304879	0.0227529	0.3015	6	36717985	36795219	-1	opa1	OPA1 mitochondrial dynamin like GTPase [Source:NCBI gene;Acc:492332]	protein_coding	ENSDART00000104256,ENSDART00000160669,ENSDART00000161928,ENSDART00000183264,ENSDART00000187751
ENSDARG00000059048		9.5657		10.4646	268	10.6892	229	11.181	223		8.76979	189	8.24955	158	8.04017	152		10.7782	8.35317	1.28655	0.363506	0.0227553	0.3015	10	213878	223885	1	mpzl1l	myelin protein zero-like 1 like [Source:ZFIN;Acc:ZDB-GENE-050417-455]	protein_coding	ENSDART00000135903,ENSDART00000138812
ENSDARG00000045696		39.4802		37.7464	968	33.9771	729	33.0926	661		44.2192	955	39.8945	766	47.9511	909		34.9387	44.0216	-1.2577	-0.330792	0.0227629	0.3015	25	23777469	23815949	1	mrpl23	mitochondrial ribosomal protein L23 [Source:NCBI gene;Acc:415142]	protein_coding	ENSDART00000067179
ENSDARG00000045633		3.08624		1.14974	29	2.25893	48	2.77648	55		3.30892	71	3.46117	66	5.56222	105		2.06172	4.11077	-2.11997	-1.08404	0.0227726	0.3015	25	27822188	27843066	-1	asb15a	ankyrin repeat and SOCS box containing 15a [Source:ZFIN;Acc:ZDB-GENE-110421-5]	protein_coding	ENSDART00000154852,ENSDART00000156906,ENSDART00000179684,ENSDART00000186000,ENSDART00000190065
ENSDARG00000013310		72.0691		76.4088	1960	45.2019	970	47.7505	954		96.19	2078	97.8235	1879	69.04	1309		56.4537	87.6845	-1.57899	-0.658999	0.0227947	0.3015	24	25913162	25989500	1	map3k15	mitogen-activated protein kinase kinase kinase 15 [Source:ZFIN;Acc:ZDB-GENE-091204-246]	protein_coding	ENSDART00000006615,ENSDART00000143099,ENSDART00000184814
ENSDARG00000042010		1.91967		2.63075	67	1.83975	39	2.97659	59		1.50405	32	1.27517	24	1.2917	24		2.48236	1.35697	1.79289	0.842287	0.0228093	0.3015	16	54450407	54455573	-1	pklr	pyruvate kinase L/R [Source:ZFIN;Acc:ZDB-GENE-010907-1]	protein_coding	ENSDART00000075275
ENSDARG00000101785		40.2999		39.6172	1016	43.1525	926	56.0049	1119		34.9172	754	33.2845	639	34.8232	660		46.2582	34.3416	1.33173	0.413304	0.0228326	0.301561	19	43297546	43309596	1	laptm5	lysosomal protein transmembrane 5 [Source:ZFIN;Acc:ZDB-GENE-170303-1]	protein_coding	ENSDART00000168002
ENSDARG00000075819		5.85756		6.80098	174	7.61516	163	6.42843	128		3.72542	80	5.75126	110	4.8241	91		6.94819	4.76693	1.48812	0.573493	0.0228753	0.30188	16	6864244	6933178	1	arhgef2	rho/rac guanine nucleotide exchange factor (GEF) 2 [Source:ZFIN;Acc:ZDB-GENE-030717-1]	protein_coding	ENSDART00000078306,ENSDART00000182852
ENSDARG00000034600		31.7864		34.1218	875	33.2785	714	37.595	751		28.6233	618	28.3399	544	28.7601	545		34.9984	28.5744	1.22267	0.290039	0.0229601	0.302751	20	22186297	22193190	-1	tmem165	transmembrane protein 165 [Source:ZFIN;Acc:ZDB-GENE-030131-3222]	protein_coding	ENSDART00000047624
ENSDARG00000022968		89.1312		84.1646	2159	78.9694	1695	71.1629	1422		109.935	2375	88.1947	1694	102.361	1941		78.099	100.163	-1.28026	-0.356442	0.0230041	0.303084	22	37542741	37565410	-1	fxr1	fragile X mental retardation, autosomal homolog 1 [Source:ZFIN;Acc:ZDB-GENE-030131-5431]	protein_coding	ENSDART00000104478,ENSDART00000148474,ENSDART00000149482
ENSDARG00000019130		56.1583		51.3094	1316	46.506	998	46.1496	922		52.9195	1143	74.6103	1433	65.4549	1241		47.9883	64.3282	-1.32871	-0.41003	0.0230396	0.303167	8	17078692	17086195	1	plk2b	polo-like kinase 2b (Drosophila) [Source:ZFIN;Acc:ZDB-GENE-070720-17]	protein_coding	ENSDART00000023206
ENSDARG00000021408		11.3221		12.9979	333	15.0207	322	11.6812	233		8.72351	188	7.98931	153	11.5199	218		13.2333	9.41089	1.42137	0.507282	0.0230479	0.303167	21	35041399	35056093	1	poglut3	protein O-glucosyltransferase 3 [Source:ZFIN;Acc:ZDB-GENE-060810-142]	protein_coding	ENSDART00000021645,ENSDART00000188183
ENSDARG00000076858		18.975		29.0162	744	21.7276	466	20.5359	410		8.26072	178	17.2538	331	17.0557	323		23.7599	14.1901	1.77449	0.827404	0.0230891	0.303462	10	20256454	20257175	1		transcriptional and immune response regulator [Source:HGNC Symbol;Acc:HGNC:1357]	protein_coding	ENSDART00000111097
ENSDARG00000014313		268.369		254.014	6517	240.308	5159	228.747	4572		303.981	6568	276.191	5306	306.976	5822		241.023	295.716	-1.22674	-0.294832	0.0231793	0.30422	1	610082	614638	-1	atp5pf	ATP synthase peripheral stalk subunit F6 [Source:ZFIN;Acc:ZDB-GENE-040426-2534]	protein_coding	ENSDART00000004062,ENSDART00000134456,ENSDART00000146351,ENSDART00000147937
ENSDARG00000017775		293.103		270.929	6951	254.374	5461	258.213	5161		342.253	7395	291.285	5596	341.562	6478		261.172	325.033	-1.2415	-0.312084	0.0231945	0.30422	9	2330798	2341127	1	atp5mc3a	ATP synthase membrane subunit c locus 3a [Source:ZFIN;Acc:ZDB-GENE-040426-857]	protein_coding	ENSDART00000016417,ENSDART00000123340,ENSDART00000130645
ENSDARG00000021195		398.393		367.467	9428	380.967	8179	265.717	5311		453.044	9789	423.329	8133	499.835	9480		338.05	458.736	-1.37141	-0.455665	0.0232032	0.30422	3	16265924	16285259	1	st8sia6	ST8 alpha-N-acetyl-neuraminide alpha-2,8-sialyltransferase 6 [Source:ZFIN;Acc:ZDB-GENE-060322-9]	protein_coding	ENSDART00000122519
ENSDARG00000101017		4.80957		4.57946	117	6.45076	138	7.42896	148		2.38335	51	3.98164	76	4.03327	76		6.15306	3.46609	1.78072	0.832457	0.023246	0.304534	3	32979969	33031799	-1			protein_coding	ENSDART00000157591,ENSDART00000181101,ENSDART00000181287,ENSDART00000181730,ENSDART00000183854,ENSDART00000193200
ENSDARG00000032976		8902.91		8306.26	213122	8257.46	177290	6507.04	130071		11192	241840	9159.21	175977	9995.46	189586		7690.26	10115.6	-1.31928	-0.399751	0.0233114	0.305144	5	64167620	64168415	-1	cmlc1	cardiac myosin light chain-1 [Source:ZFIN;Acc:ZDB-GENE-030522-1]	protein_coding	ENSDART00000048395
ENSDARG00000007836		480.323		612.381	15712	525.772	11288	515	10294		494.833	10692	386.219	7420	347.731	6595		551.051	409.595	1.35641	0.439791	0.0233631	0.305377	5	44804791	44810920	1	ctsla	cathepsin La [Source:ZFIN;Acc:ZDB-GENE-030131-106]	protein_coding	ENSDART00000122288,ENSDART00000128813,ENSDART00000136965,ENSDART00000141198,ENSDART00000184237
ENSDARG00000002947		15.9815		14.7907	379	13.2508	284	13.3321	266		20.9873	453	16.5251	317	17.003	322		13.7912	18.1718	-1.31187	-0.391622	0.0233671	0.305377	2	15109528	15125512	-1	abcd3b	ATP-binding cassette, sub-family D (ALD), member 3b [Source:ZFIN;Acc:ZDB-GENE-050517-29]	protein_coding	ENSDART00000005643
ENSDARG00000058646		3.55563		5.04715	129	4.91375	105	3.87707	77		3.67915	79	2.47226	47	1.34442	25		4.61266	2.49861	1.97018	0.978331	0.0234253	0.305711	9	7548533	7619622	1	ptprna	protein tyrosine phosphatase receptor type Na [Source:ZFIN;Acc:ZDB-GENE-030131-3511]	protein_coding	ENSDART00000081543,ENSDART00000143847
ENSDARG00000040725		2.99856		3.17639	81	4.12196	88	3.82704	76		2.10567	45	2.88864	55	1.87165	35		3.70847	2.28865	1.62871	0.703727	0.0234486	0.305711	15	14034254	14038227	-1	zgc:114130	zgc:114130 [Source:ZFIN;Acc:ZDB-GENE-050913-48]	protein_coding	ENSDART00000139068
ENSDARG00000022615		4.34313		4.73536	121	5.61239	120	6.27835	125		1.73545	37	4.08574	78	3.61149	68		5.54203	3.14422	1.883	0.913035	0.0234493	0.305711	2	944341	985417	-1	si:ch211-241e1.3	si:ch211-241e1.3 [Source:ZFIN;Acc:ZDB-GENE-030131-230]	protein_coding	ENSDART00000140540,ENSDART00000142190
ENSDARG00000060751		28.9338		36.928	947	28.9469	621	32.7925	655		25.5226	551	27.5592	529	21.8535	414		32.8891	24.9784	1.31668	0.396908	0.0235098	0.306253	5	15359995	15494297	-1	taok3a	TAO kinase 3a [Source:ZFIN;Acc:ZDB-GENE-100921-50]	protein_coding	ENSDART00000085943,ENSDART00000140668,ENSDART00000188076
ENSDARG00000030038		10.7928		12.0235	308	12.2262	262	12.3316	246		8.16817	176	10.2274	196	9.78001	185		12.1938	9.39185	1.30864	0.388072	0.0235352	0.30629	20	14458930	14463012	-1	grcc10	gene rich cluster, C10 gene [Source:NCBI gene;Acc:323559]	protein_coding	ENSDART00000044125,ENSDART00000152418,ENSDART00000152668
ENSDARG00000051986		248.807		235.735	6048	222.144	4769	195.329	3904		293.985	6352	245.951	4725	299.701	5684		217.736	279.879	-1.28444	-0.361141	0.0235506	0.30629	1	44814322	44823071	1	ndufs8a	NADH:ubiquinone oxidoreductase core subunit S8a [Source:ZFIN;Acc:ZDB-GENE-040426-2153]	protein_coding	ENSDART00000059227
ENSDARG00000010658		17.4085		21.6111	554	21.3085	457	17.4843	349		11.7316	253	16.5251	317	15.7904	299		20.1346	14.6824	1.39069	0.475803	0.0236181	0.306922	7	41007773	41014773	-1	insig1	insulin induced gene 1 [Source:NCBI gene;Acc:334189]	protein_coding	ENSDART00000013785,ENSDART00000148601,ENSDART00000150139
ENSDARG00000058257		12.1367		12.3743	317	15.9988	343	13.7323	274		8.76979	189	11.2163	215	10.729	203		14.0351	10.2384	1.37202	0.4563	0.0236474	0.306979	7	13896769	13906409	-1	slc39a1	solute carrier family 39 member 1 [Source:NCBI gene;Acc:321324]	protein_coding	ENSDART00000062257
ENSDARG00000075299		6.28087		3.72203	95	5.47267	117	4.97765	99		10.2507	221	5.9074	113	7.35478	139		4.72412	7.83763	-1.6719	-0.741491	0.0236629	0.306979	8	1269941	1278948	-1	prxl2c	peroxiredoxin like 2C [Source:ZFIN;Acc:ZDB-GENE-110914-194]	protein_coding	ENSDART00000112130,ENSDART00000169095,ENSDART00000179683
ENSDARG00000014554		183.074		165.582	4248	177.617	3813	134.397	2686		204.297	4414	191.769	3684	224.782	4263		159.198	206.949	-1.30617	-0.385346	0.0236807	0.306979	12	16281312	16288285	1	ppp1r3cb	protein phosphatase 1, regulatory subunit 3Cb [Source:NCBI gene;Acc:393807]	protein_coding	ENSDART00000013360,ENSDART00000141169,ENSDART00000152500
ENSDARG00000098004		1.483		2.31896	59	1.70002	36	1.72592	34		1.31894	28	0.858786	16	0.975365	18		1.91497	1.05103	1.84138	0.880791	0.0236985	0.306979	15	41757442	41762565	-1	ftr91	finTRIM family, member 91 [Source:ZFIN;Acc:ZDB-GENE-131125-31]	protein_coding	ENSDART00000154971,ENSDART00000187125
ENSDARG00000052341		37.6399		34.0829	874	34.536	741	33.4929	669		39.2211	847	41.2477	792	43.2588	820		34.0372	41.2425	-1.21051	-0.275621	0.023733	0.306985	20	23173710	23181762	1	sgcb	sarcoglycan, beta (dystrophin-associated glycoprotein) [Source:ZFIN;Acc:ZDB-GENE-030131-6695]	protein_coding	ENSDART00000074172
ENSDARG00000108340		10.255		12.0235	308	12.8317	275	13.6823	273		4.97495	107	5.12669	98	12.8906	244		12.8458	7.66409	1.87513	0.906993	0.0237708	0.306985	5	4223515	4230370	-1	si:ch211-283g2.2	si:ch211-283g2.2 [Source:ZFIN;Acc:ZDB-GENE-060526-151]	protein_coding	ENSDART00000133187,ENSDART00000140748
ENSDARG00000103978		11.6589		13.7384	352	13.344	286	14.8829	297		8.90862	192	12.6736	243	6.40578	121		13.9884	9.32933	1.55344	0.635468	0.0237737	0.306985	16	36126310	36163508	1	sh3bp5b	SH3-domain binding protein 5b (BTK-associated) [Source:ZFIN;Acc:ZDB-GENE-040426-2813]	protein_coding	ENSDART00000166040,ENSDART00000189802
ENSDARG00000093851		5.98303		7.65841	196	6.54391	140	6.72859	134		4.32705	93	4.8144	92	5.82583	110		6.97697	4.98909	1.41937	0.505255	0.0238088	0.306985	8	12452086	12669091	-1			processed_transcript	ENSDART00000114118,ENSDART00000143155,ENSDART00000175148
ENSDARG00000063917		8409.29		8177.22	209811	6817.24	146368	6329.75	126527		11086.7	239565	8070.74	155064	9974.06	189180		7108.07	9710.51	-1.36258	-0.446342	0.0238101	0.306985	MT	11299	12679	1	mt-nd4	NADH dehydrogenase subunit 4 [Source:NCBI gene;Acc:140534]	protein_coding	ENSDART00000093618
ENSDARG00000101459		13.7521		13.6215	349	18.8399	404	18.2347	364		7.05748	152	13.7666	264	10.9926	208		16.8987	10.6056	1.64347	0.716746	0.0238129	0.306985	4	35130120	35293690	1	si:dkey-279j5.1	si:dkey-279j5.1 [Source:ZFIN;Acc:ZDB-GENE-120703-27]	protein_coding	ENSDART00000165372,ENSDART00000167934,ENSDART00000181204,ENSDART00000183689,ENSDART00000192116,ENSDART00000192178,ENSDART00000192362
ENSDARG00000043021		8.51595		9.60712	246	9.61792	206	9.73019	194		6.73353	145	7.2086	138	8.19834	155		9.65174	7.38016	1.31568	0.395804	0.0238662	0.307256	22	11497366	11520405	-1	slc26a11	solute carrier family 26 member 11 [Source:ZFIN;Acc:ZDB-GENE-030131-5349]	protein_coding	ENSDART00000063157,ENSDART00000193885
ENSDARG00000010478		296.311		292.637	7508	176.639	3792	173.467	3467		264.042	5705	516.547	9924	354.532	6724		214.248	378.374	-1.75483	-0.811334	0.0238719	0.307256	20	53982317	54012043	-1	hsp90aa1.1	heat shock protein 90, alpha (cytosolic), class A member 1, tandem duplicate 1 [Source:NCBI gene;Acc:30591]	protein_coding	ENSDART00000004756,ENSDART00000152830,ENSDART00000170138
ENSDARG00000073869		28.1348		19.9742	512	28.9469	621	23.9878	479		31.724	685	31.5669	606	32.6088	618		24.303	31.9666	-1.33396	-0.415715	0.0239178	0.307421	6	44243070	44402358	-1	pdzrn3b	PDZ domain containing RING finger 3b [Source:NCBI gene;Acc:100005518]	protein_coding	ENSDART00000114330,ENSDART00000157215,ENSDART00000193007,ENSDART00000193603
ENSDARG00000076221		36.2219		50.491	1295	70.8186	1520	30.9415	618		35.8427	774	9.91507	190	19.3228	366		50.7504	21.6935	2.50091	1.32246	0.0239228	0.307421	3	32105175	32106672	1	fthl28	ferritin, heavy polypeptide-like 28 [Source:ZFIN;Acc:ZDB-GENE-030131-7540]	protein_coding	ENSDART00000113789
ENSDARG00000102356		40.9425		27.925	716	41.8484	898	31.4418	628		50.5593	1092	54.2596	1042	39.6209	751		33.7384	48.1466	-1.43698	-0.523038	0.0240615	0.308958	23	41831224	41854104	1	scp2b	sterol carrier protein 2b [Source:ZFIN;Acc:ZDB-GENE-041010-196]	protein_coding	ENSDART00000171885
ENSDARG00000098589		51.9307		45.97	1179	41.2895	886	50.4519	1008		57.2234	1236	62.9516	1209	53.6978	1018		45.9038	57.9576	-1.26422	-0.338247	0.0241107	0.309344	24	2836307	2843107	-1	cyb5a	cytochrome b5 type A (microsomal) [Source:ZFIN;Acc:ZDB-GENE-040426-2148]	protein_coding	ENSDART00000165290
ENSDARG00000003081		19.4667		16.8563	432	16.9769	364	15.5333	310		18.5346	400	26.5183	509	22.3807	424		16.4555	22.4778	-1.34757	-0.430364	0.0241502	0.309353	6	55032439	55082533	1	mybphb	myosin binding protein Hb [Source:ZFIN;Acc:ZDB-GENE-030131-9794]	protein_coding	ENSDART00000026359,ENSDART00000122794,ENSDART00000157584,ENSDART00000158845,ENSDART00000164232,ENSDART00000172526,ENSDART00000183742
ENSDARG00000103135		21.3852		18.9999	487	18.7468	402	18.4348	368		27.3275	590	21.2615	408	23.5406	446		18.7272	24.0432	-1.27865	-0.354624	0.0241931	0.309353	10	16857529	16868211	-1	stoml2	stomatin (EPB72)-like 2 [Source:ZFIN;Acc:ZDB-GENE-040426-1139]	protein_coding	ENSDART00000171755
ENSDARG00000059175		6.36331		4.85228	124	6.1713	132	5.12773	102		7.56654	163	6.89631	132	7.56567	143		5.38377	7.34284	-1.3764	-0.460903	0.0242094	0.309353	22	2937485	2942954	1	cep19	centrosomal protein 19 [Source:NCBI gene;Acc:619252]	protein_coding	ENSDART00000082222,ENSDART00000135507,ENSDART00000143258
ENSDARG00000096037		5.14965		3.52716	90	1.97947	42	4.57744	91		9.04746	195	7.41679	142	4.3496	82		3.36136	6.93795	-2.11572	-1.08115	0.0242173	0.309353	4	5249494	5253973	1	si:ch211-214j24.14	si:ch211-214j24.14 [Source:ZFIN;Acc:ZDB-GENE-110914-226]	protein_coding	ENSDART00000150391
[truncated: 14,902 more rows]

## Sheet: upregulated genes
ID	zfin_id_symbol	description	foldChange	logFC	P.Value	adj.P.Val	AvrExp	ave_KO	ave_WT	Norm_KO_2	Raw_KO_2	Norm_KO_3	Raw_KO_3	Norm_KO_4	Raw_KO_4	Norm_WT_1	Raw_WT_1	Norm_WT_2	Raw_WT_2	Norm_WT_4	Raw_WT_4	chromosome_name	start_position	end_position	strand	zfin_id_symbol	description	gene_biotype	ensembl_transcript_id
[truncated: 990 more rows]

[truncated: 3 more sheets: downregulated genes, Figure 4B, Figure 4C]
